# Supplementary material for: A bivalent histone mark reader, AtDEK2 governs plant immunity
Source: Research Square preprint supplement (doi:10.21203/rs.3.rs-3829971/v1), 2024-03-05
Supplement: Supplementary file 1 [file 08b97b6411a5b299c9a808a6.xlsx]

## Sheet: Sheet1
seqnames	start	end	length	abs_summit	pileup	X.log10.pvalue.	fold_enrichment	X.log10.qvalue.	name	geneId	distanceToTSS
chr2	16699862	16702293	2433	16701072	260.93	78.3588	4.17488	70.5763	DEK2_peak_9856	AT2G39990	0
chr1	26357490	26358236	748	26357810	227.87	68.4308	4.15656	62.7277	DEK2_peak_5578	AT1G69980	0
chr4	14653196	14655068	1874	14653567	246.63	71.6902	4.04169	65.7913	DEK2_peak_18443	AT4G29940	0
chr1	4787949	4788775	828	4788349	211.78	58.6539	3.86444	53.6976	DEK2_peak_1445	AT1G13980	0
chr5	19158934	19159414	482	19159198	211.78	58.6539	3.86444	53.6976	DEK2_peak_23389	AT5G47170	0
chr1	23473442	23474335	895	23473932	232.34	63.2685	3.80833	58.0406	DEK2_peak_4771	AT1G63290	0
chr3	10152222	10152770	550	10152471	208.21	56.8777	3.79952	52.0558	DEK2_peak_13770	AT3G27430	0
chr1	9647554	9650377	2825	9648222	231.44	61.9049	3.75514	56.7497	DEK2_peak_2785	AT1G27730	0
chr3	5248587	5249244	659	5248866	248.42	65.5757	3.72271	60.1718	DEK2_peak_12481	AT3G15518	0
chr1	29502900	29504687	1789	29503348	226.08	59.7692	3.70624	54.7516	DEK2_peak_6709	AT1G78420	0
chr1	27644748	27646743	1997	27645797	200.17	52.2326	3.65346	47.707	DEK2_peak_6021	AT1G73530	0
chr3	20047510	20049052	1544	20048728	202.85	52.2693	3.64014	47.7376	DEK2_peak_14948	AT3G54140	0
chr4	14841121	14842004	885	14841558	198.38	51.0926	3.621	46.6457	DEK2_peak_18512	AT4G30340	-54
chr1	2457194	2458464	1272	2457537	198.38	51.0926	3.621	46.6457	DEK2_peak_757	AT1G07930	0
chr4	13809346	13814819	5475	13810323	198.38	51.0926	3.621	46.6457	DEK2_peak_18192	AT4G27652	0
chr5	23413579	23414230	653	23413893	197.49	50.5258	3.60477	46.1143	DEK2_peak_24517	AT5G57790	0
chr4	13072797	13074377	1582	13073861	196.59	49.9612	3.58854	45.5912	DEK2_peak_17974	AT4G25630	0
chr5	17730709	17731225	518	17731026	225.19	56.9778	3.58119	52.1516	DEK2_peak_23049	AT5G44060	0
chr1	6299627	6301533	1908	6300984	196.59	49.8256	3.58087	45.468	DEK2_peak_1892	AT1G18300	0
chr5	2482702	2483599	899	2483059	213.57	53.856	3.57618	49.2258	DEK2_peak_20514	AT5G07790	0
chr2	17199342	17200657	1317	17200197	195.7	49.3988	3.57231	45.0664	DEK2_peak_10004	AT2G41240	-22
chr3	732580	733824	1246	733185	198.38	50.1555	3.56844	45.7692	DEK2_peak_11104	AT3G03180	0
chr4	17144197	17145321	1126	17144737	201.95	50.5521	3.5606	46.1356	DEK2_peak_19219	AT4G36230	-265
chr5	26905517	26907229	1714	26906808	236.8	58.7649	3.54932	53.8013	DEK2_peak_25711	AT5G67420	0
chr3	5121203	5123452	2251	5122648	243.95	60.244	3.5426	55.1844	DEK2_peak_12435	AT3G15210	0
chr1	28586144	28588031	1889	28586568	193.02	48.2806	3.52363	44.0366	DEK2_peak_6363	AT1G76170	0
chr1	951644	952395	753	951993	210	51.6269	3.51661	47.1526	DEK2_peak_314	AT1G03780	0
chr2	9809126	9810211	1087	9809836	193.91	47.7485	3.50958	43.5504	DEK2_peak_7998	AT2G23040	0
chr5	739934	741676	1744	741076	218.93	53.2653	3.49099	48.6745	DEK2_peak_19977	AT5G03140	0
chr4	15487816	15490921	3107	15489572	209.1	51.4057	3.49014	46.9374	DEK2_peak_18726	AT4G32020	0
chr2	10846707	10848039	1334	10847267	223.4	54.5646	3.48908	49.8819	DEK2_peak_8219	AT2G25482	-359
chr2	15276653	15278953	2302	15277338	201.06	49.4307	3.4838	45.0949	DEK2_peak_9385	AT2G36410	0
chr3	21261032	21263935	2905	21262697	197.49	48.2327	3.47666	44.0094	DEK2_peak_15322	AT3G57450	0
chr5	4873503	4874908	1407	4874064	194.81	47.2783	3.46797	43.1099	DEK2_peak_21214	AT5G15050	0
chr1	23695402	23696861	1461	23695722	188.55	45.5243	3.44248	41.4825	DEK2_peak_4831	AT1G63850	-101
chr2	10753432	10755661	2231	10754921	188.55	45.5243	3.44248	41.4825	DEK2_peak_8196	AT2G25250	0
chr1	772964	773638	676	773267	226.08	54.3627	3.44063	49.6992	DEK2_peak_257	AT1G03180	0
chr2	19483467	19484281	816	19483971	211.78	50.39	3.42476	45.9908	DEK2_peak_10822	AT2G47480	361
chr5	14997780	14999347	1569	14998560	193.91	46.1489	3.4195	42.0616	DEK2_peak_22536	AT5G37770	272
chr3	22808291	22810536	2247	22809866	207.32	49.4378	3.41501	45.1007	DEK2_peak_15748	AT3G61640	211
chr5	18461863	18462421	560	18462128	193.02	46.1489	3.40382	42.0616	DEK2_peak_23229	AT5G45550	0
chr1	3301922	3302634	714	3302340	243.95	57.1277	3.40213	52.2859	DEK2_peak_990	AT1G10110	-108
chr5	1829346	1830375	1031	1830113	185.87	43.8977	3.39379	39.9697	DEK2_peak_20320	AT5G06070	-160
chr5	1249693	1250511	820	1250023	207.32	49.0144	3.39298	44.7119	DEK2_peak_20139	AT5G04420	0
chr1	6528107	6529189	1084	6528438	215.36	50.5553	3.38059	46.1384	DEK2_peak_1959	AT1G18900	0
chr3	19686628	19687929	1303	19687308	193.91	45.4041	3.37802	41.3722	DEK2_peak_14836	AT3G53100	0
chr3	4221429	4222045	618	4221794	184.98	43.3602	3.37757	39.4693	DEK2_peak_12138	AT3G13120	0
chr5	4620494	4621354	862	4621048	184.98	43.3602	3.37757	39.4693	DEK2_peak_21135	AT5G14330	0
chr1	4621644	4622296	654	4621925	238.59	55.5019	3.37453	50.7674	DEK2_peak_1392	AT1G13470	-64
chr3	18616240	18616760	522	18616453	185.87	43.44	3.36732	39.545	DEK2_peak_14486	AT3G50210	0
chr3	1350643	1351888	1247	1351457	184.08	43.3602	3.36134	39.4693	DEK2_peak_11280	AT3G04903	133
chr2	16159767	16160837	1072	16160166	193.91	45.0889	3.36054	41.0761	DEK2_peak_9679	AT2G38646	0
chr1	29803773	29809931	6160	29805331	189.44	44.3006	3.35802	40.3483	DEK2_peak_6802	AT1G79240	0
chr5	22031294	22032182	890	22031894	194.81	45.2774	3.35685	41.2527	DEK2_peak_24096	AT5G54260	0
chr2	13879733	13880192	461	13879962	195.7	45.5255	3.35646	41.4834	DEK2_peak_8994	AT2G32730	0
chr1	2927280	2929494	2216	2928860	204.63	47.4946	3.35391	43.3132	DEK2_peak_884	AT1G09070	0
chr1	1660390	1662809	2421	1661395	184.98	42.9497	3.35375	39.0984	DEK2_peak_520	AT1G05575	0
chr5	2656167	2657005	840	2656548	191.23	44.6208	3.34739	40.6404	DEK2_peak_20560	AT5G08260	-146
chr1	3881237	3881810	575	3881518	183.19	42.8249	3.34511	38.9829	DEK2_peak_1158	AT1G11550	0
chr1	22033513	22040771	7260	22039929	186.76	43.2052	3.33919	39.3359	DEK2_peak_4451	AT1G59870	0
chr3	3825388	3826339	953	3826001	195.7	45.112	3.33388	41.0967	DEK2_peak_12017	AT3G12020	0
chr5	17691728	17692918	1192	17692048	195.7	45.0447	3.33021	41.0371	DEK2_peak_23037	AT5G43960	0
chr3	23281368	23282238	872	23281826	182.29	42.292	3.32888	38.4886	DEK2_peak_15907	AT3G62988	0
chr4	16160072	16160644	574	16160354	193.02	44.7884	3.32861	40.7997	DEK2_peak_18908	AT4G33640	0
chr5	22859847	22860486	641	22860172	206.42	47.5101	3.32834	43.3284	DEK2_peak_24335	AT5G56450	0
chr5	24666829	24667508	681	24667138	248.42	56.6586	3.32562	51.8512	DEK2_peak_24900	AT5G61345	0
chr1	22979965	22980725	762	22980385	211.78	48.4236	3.32474	44.1682	DEK2_peak_4648	AT1G62190	-251
chr4	16354218	16358039	3823	16357465	193.02	44.7012	3.32382	40.7168	DEK2_peak_18965	AT4G34150	0
chr3	6182712	6183849	1139	6183312	198.38	45.6683	3.32299	41.6152	DEK2_peak_12773	AT3G18060	0
chr1	30382600	30385992	3394	30383752	187.66	42.9396	3.30976	39.0888	DEK2_peak_6969	AT1G80840	0
chr4	10247237	10248974	1739	10247755	182.29	41.9527	3.30917	38.1768	DEK2_peak_17246	AT4G18600	0
chr1	21717243	21717837	596	21717490	193.02	44.3109	3.30243	40.3577	DEK2_peak_4415	AT1G58440	0
chr4	14733841	14735074	1235	14734127	186.76	42.5556	3.30219	38.7339	DEK2_peak_18464	AT4G30130	0
chr1	22984133	22984789	658	22984572	184.98	42.0389	3.30124	38.2575	DEK2_peak_4649	AT1G62200	0
chr3	21103106	21103693	589	21103391	180.51	41.2333	3.29642	37.5106	DEK2_peak_15259	AT3G57030	0
chr1	8135839	8136645	808	8136287	186.76	42.4127	3.29408	38.601	DEK2_peak_2435	AT1G22985	0
chr3	16757232	16759421	2191	16758977	208.21	47.315	3.29266	43.1439	DEK2_peak_14070	AT3G45650	0
chr5	26849710	26850367	659	26849949	209.1	47.5625	3.29258	43.3794	DEK2_peak_25681	AT5G67290	0
chr5	3578081	3578881	802	3578413	183.19	41.8546	3.28908	38.0854	DEK2_peak_20840	AT5G11225	0
chr3	4560549	4561420	873	4560976	218.93	49.1694	3.28861	44.8567	DEK2_peak_12247	AT3G13855	0
chr2	10905920	10906781	863	10906264	201.95	45.3916	3.2832	41.3604	DEK2_peak_8230	AT2G25625	0
chr2	19231133	19232244	1113	19231906	179.61	40.7075	3.28019	37.024	DEK2_peak_10727	AT2G46787	-133
chr1	20971518	20972031	515	20971825	179.61	40.7075	3.28019	37.024	DEK2_peak_4280	AT1G56070	0
chr1	9125318	9125894	578	9125693	191.23	43.3226	3.27553	39.4457	DEK2_peak_2647	AT1G26370	0
chr4	17827947	17828677	732	17828352	215.36	48.3854	3.27319	44.1323	DEK2_peak_19505	AT4G37910	0
chr3	10191882	10192571	691	10192213	193.02	43.7747	3.27318	39.859	DEK2_peak_13776	AT3G27520	0
chr3	21279156	21279891	737	21279442	209.1	47.1571	3.27212	43.005	DEK2_peak_15327	AT3G57480	0
chr1	1349748	1350301	555	1350030	199.27	44.8972	3.2687	40.9029	DEK2_peak_440	AT1G04810	0
chr1	3012230	3012929	701	3012463	222.51	49.7129	3.26717	45.3591	DEK2_peak_905	AT1G09320	0
chr1	30387551	30388497	948	30387960	201.06	45.3492	3.26652	41.3204	DEK2_peak_6970	AT1G80850	-29
chr3	994319	995584	1267	995038	178.72	40.1841	3.26396	36.5378	DEK2_peak_11166	AT3G03870	0
chr2	18236619	18237378	761	18237051	194.81	43.5657	3.26342	39.6609	DEK2_peak_10352	AT2G44080	0
chr5	2828419	2829309	892	2828841	210.89	46.884	3.25985	42.7447	DEK2_peak_20609	AT5G08695	0
chr3	22208846	22210456	1612	22209431	236.8	52.3994	3.2576	47.8596	DEK2_peak_15567	AT3G60130	0
chr1	452590	453394	806	452927	209.1	46.8185	3.25509	42.6831	DEK2_peak_151	AT1G02290	0
chr1	1108365	1109189	826	1108848	202.85	45.006	3.25017	41.0003	DEK2_peak_357	AT1G04190	0
chr1	24936191	24936814	625	24936556	177.83	39.6631	3.24773	36.0531	DEK2_peak_5127	AT1G66840	0
chr1	29421486	29422542	1058	29422045	177.83	39.6631	3.24773	36.0531	DEK2_peak_6669	AT1G78206	0
chr1	9184232	9184800	570	9184526	178.72	39.7297	3.23727	36.1168	DEK2_peak_2662	AT1G26580	0
chr2	17899300	17899866	568	17899549	207.32	45.9472	3.23582	41.8798	DEK2_peak_10224	AT2G43040	0
chr5	5140401	5141370	971	5140994	176.93	39.1446	3.2315	35.5691	DEK2_peak_21289	AT5G15750	0
chr5	21898253	21898909	658	21898604	176.93	39.1446	3.2315	35.5691	DEK2_peak_24055	AT5G53940	0
chr2	14050995	14051841	848	14051535	192.12	42.7261	3.22951	38.8944	DEK2_peak_9032	AT2G33150	0
chr5	7626804	7627356	554	7627107	189.44	41.9669	3.22786	38.1901	DEK2_peak_21940	AT5G22820	0
chr3	5002757	5004178	1423	5003654	189.44	41.9441	3.2266	38.1687	DEK2_peak_12395	AT3G14870	390
chr1	6463245	6465910	2667	6465226	201.06	44.5505	3.22492	40.5759	DEK2_peak_1942	AT1G18740	0
chr3	515524	516278	756	515803	185.87	40.8893	3.22188	37.1938	DEK2_peak_11030	AT3G02493	80
chr5	19171035	19171929	896	19171378	208.21	45.8481	3.2186	41.7854	DEK2_peak_23393	AT5G47210	0
chr2	7462400	7463033	635	7462682	219.83	47.9509	3.2181	43.7401	DEK2_peak_7448	AT2G17130	0
chr1	3803528	3804491	965	3804151	176.04	39.1446	3.21528	35.5691	DEK2_peak_1138	AT1G11310	0
chr1	20450368	20451199	833	20451022	176.04	39.1446	3.21528	35.5691	DEK2_peak_4168	AT1G54830	0
chr5	895083	895968	887	895511	188.55	41.4693	3.21375	37.7308	DEK2_peak_20044	AT5G03550	177
chr4	16659122	16660474	1354	16660132	197.49	43.3362	3.21201	39.4588	DEK2_peak_19073	AT4G34980	0
chr2	706540	707159	621	706875	194.81	42.5735	3.20992	38.7497	DEK2_peak_7126	AT2G02600	0
chr3	5561042	5561636	596	5561351	191.23	42.012	3.20385	38.2317	DEK2_peak_12577	AT3G16380	-49
chr3	5000667	5001697	1032	5001142	191.23	42.012	3.20385	38.2317	DEK2_peak_12393	AT3G14860	0
chr1	6994866	6995532	668	6995268	181.4	39.8265	3.20081	36.2074	DEK2_peak_2102	AT1G20170	0
chr3	4431894	4432402	510	4432220	181.4	39.8059	3.19963	36.1887	DEK2_peak_12200	AT3G13570	0
chr5	25366676	25367220	546	25366933	201.06	44.0536	3.19918	40.116	DEK2_peak_25131	AT5G63280	0
chr1	28712762	28713830	1070	28713056	175.15	38.6284	3.19905	35.0939	DEK2_peak_6405	AT1G76510	0
chr1	4057822	4058306	486	4058073	192.12	42.1044	3.19584	38.3177	DEK2_peak_1206	AT1G12013	0
chr3	2343290	2344857	1569	2344597	193.91	42.0606	3.19527	38.2757	DEK2_peak_11595	AT3G07340	0
chr2	17921438	17922238	802	17921827	235.02	51.0258	3.19504	46.591	DEK2_peak_10232	AT2G43110	0
chr5	26363314	26364276	964	26363618	189.44	41.2631	3.18916	37.5381	DEK2_peak_25492	AT5G65910	0
chr4	18510168	18511842	1676	18511395	190.34	41.4986	3.18895	37.7581	DEK2_peak_19708	AT4G39900	0
chr5	26969198	26970143	947	26969600	215.36	46.5976	3.18614	42.4852	DEK2_peak_25740	AT5G67630	0
chr3	6476913	6477885	974	6477593	199.27	43.2948	3.18465	39.4194	DEK2_peak_12851	AT3G18790	0
chr2	11861150	11862268	1120	11861769	192.12	41.8788	3.18367	38.1085	DEK2_peak_8454	AT2G27840	0
chr3	51183	51660	479	51476	226.08	48.8741	3.18264	44.5853	DEK2_peak_10891	AT3G01150	0
chr1	26430273	26430707	436	26430545	186.76	40.4248	3.18242	36.7641	DEK2_peak_5599	AT1G70190	0
chr3	21830157	21832477	2322	21832191	182.29	39.7037	3.18016	36.0917	DEK2_peak_15469	AT3G59060	0
chr3	23181176	23182734	1560	23182344	178.72	38.6381	3.17365	35.1032	DEK2_peak_15873	AT3G62680	0
chr3	3459332	3460084	754	3459845	215.36	46.3132	3.17241	42.2155	DEK2_peak_11908	AT3G11030	0
chr2	12814078	12817239	3163	12816336	201.95	43.2383	3.17116	39.366	DEK2_peak_8721	AT2G30020	0
chr2	277860	278305	447	278089	176.93	38.0855	3.16912	34.5952	DEK2_peak_7043	AT2G01620	0
chr5	1984148	1984857	711	1984330	179.61	38.7421	3.16594	35.2015	DEK2_peak_20377	AT5G06510	-134
chr3	22470137	22470701	566	22470478	208.21	44.7758	3.16504	40.7875	DEK2_peak_15662	AT3G60805	0
chr1	7884033	7885186	1155	7884231	223.4	47.6852	3.16057	43.4962	DEK2_peak_2347	AT1G22320	0
chr5	1519441	1520116	677	1519831	182.29	39.3379	3.15944	35.7509	DEK2_peak_20222	AT5G05140	0
chr5	96627	97504	879	96972	182.29	39.2167	3.15259	35.6374	DEK2_peak_19772	AT5G01240	-390
chr4	10355154	10356138	986	10355710	191.23	41.0416	3.15132	37.3361	DEK2_peak_17277	AT4G18900	-327
chr5	2217980	2218488	510	2218205	172.47	37.0947	3.15036	33.6685	DEK2_peak_20451	AT5G07152	-168
chr1	28004029	28005464	1437	28004670	172.47	37.0947	3.15036	33.6685	DEK2_peak_6135	AT1G74510	0
chr2	16359673	16360396	725	16360096	172.47	37.0947	3.15036	33.6685	DEK2_peak_9733	AT2G39200	0
chr5	19955803	19956646	845	19956211	190.34	40.6784	3.14441	37.0017	DEK2_peak_23590	AT5G49220	0
chr4	14880294	14881018	726	14880678	177.83	37.7754	3.13731	34.3038	DEK2_peak_18534	AT4G30430	0
chr3	9986362	9987007	647	9986677	184.08	39.4082	3.13698	35.8164	DEK2_peak_13722	AT3G27080	0
chr3	3144315	3145106	793	3144719	209.1	44.4213	3.13586	40.4613	DEK2_peak_11825	AT3G10160	0
chr4	9040237	9040832	597	9040561	179.61	38.1198	3.13023	34.6213	DEK2_peak_16930	AT4G15950	0
chr3	7663453	7664226	775	7663931	193.02	41.0991	3.12932	37.3897	DEK2_peak_13160	AT3G21740	0
chr1	4855105	4855890	787	4855498	201.06	42.5774	3.12337	38.7534	DEK2_peak_1466	AT1G14200	0
chr5	25209330	25210567	1239	25209616	208.21	43.9177	3.12253	39.9884	DEK2_peak_25079	AT5G62760	0
chr5	16181287	16181833	548	16181562	176.93	37.2721	3.12163	33.8354	DEK2_peak_22684	AT5G40440	0
chr3	7115059	7116349	1292	7115904	174.25	37.053	3.1202	33.6349	DEK2_peak_13025	AT3G20410	0
chr2	14653846	14654479	635	14654133	170.68	36.0847	3.1179	32.7246	DEK2_peak_9199	AT2G34730	0
chr4	7948094	7948789	697	7948493	170.68	36.0847	3.1179	32.7246	DEK2_peak_16727	AT4G13670	0
chr5	15785433	15785937	506	15785668	184.08	39.0473	3.11691	35.4891	DEK2_peak_22612	AT5G39450	0
chr2	11338326	11339036	712	11338604	223.4	46.7368	3.11667	42.6073	DEK2_peak_8336	AT2G26660	0
chr5	21560405	21560974	571	21560638	204.63	42.852	3.11568	39.0075	DEK2_peak_23950	AT5G53160	0
chr5	25529263	25529742	481	25529451	181.4	38.3123	3.11472	34.8041	DEK2_peak_25182	AT5G63800	-313
chr5	23803595	23804079	486	23803874	189.44	39.8366	3.11147	36.2168	DEK2_peak_24623	AT5G58950	0
chr5	14622948	14623633	687	14623152	207.32	43.4161	3.10919	39.5228	DEK2_peak_22495	AT5G37010	-7
chr1	22794561	22795486	927	22795255	182.29	38.401	3.10669	34.8871	DEK2_peak_4601	AT1G61730	0
chr4	10295933	10296635	704	10296225	210	43.4811	3.10289	39.5824	DEK2_peak_17262	AT4G18710	0
chr3	9488543	9489011	470	9488815	169.78	35.5834	3.10167	32.2571	DEK2_peak_13595	AT3G25910	-210
chr1	10630278	10631165	889	10630630	169.78	35.5834	3.10167	32.2571	DEK2_peak_3009	AT1G30210	0
chr1	12554008	12554554	548	12554286	178.72	37.336	3.09863	33.8951	DEK2_peak_3378	AT1G34380	0
chr2	15705104	15706526	1424	15706145	172.47	36.2063	3.09759	32.8397	DEK2_peak_9526	AT2G37430	0
chr1	26555025	26555761	738	26555402	177.83	37.0775	3.097	33.6579	DEK2_peak_5647	AT1G70460	-85
chr5	3786655	3787384	731	3787146	175.15	36.8432	3.09446	33.4349	DEK2_peak_20897	AT5G11750	0
chr5	1930208	1932765	2559	1930946	195.7	40.6171	3.09372	36.9434	DEK2_peak_20360	AT5G06320	0
chr2	11531671	11532222	553	11531987	187.66	39.0305	3.09273	35.473	DEK2_peak_8374	AT2G27030	0
chr3	7096008	7096524	518	7096257	185.87	38.5446	3.09125	35.0215	DEK2_peak_13017	AT3G20350	0
chr4	7019335	7019836	503	7019589	176.04	37.0093	3.09077	33.5932	DEK2_peak_16564	AT4G11630	0
chr1	1410560	1411309	751	1410961	210.89	43.4036	3.08788	39.5113	DEK2_peak_452	AT1G04960	0
chr4	16596204	16596858	656	16596485	168.89	35.0847	3.08544	31.7926	DEK2_peak_19051	AT4G34800	-2
chr3	5964986	5966079	1095	5965809	168.89	35.0847	3.08544	31.7926	DEK2_peak_12708	AT3G17430	0
chr5	24686400	24687805	1407	24687437	168.89	35.0847	3.08544	31.7926	DEK2_peak_24907	AT5G61412	0
chr3	22186740	22187674	936	22187435	198.38	41.1354	3.08494	37.4252	DEK2_peak_15557	AT3G60075	0
chr3	20683955	20685488	1535	20684671	168.89	35.0727	3.08472	31.7862	DEK2_peak_15119	AT3G55730	0
chr2	17589680	17590408	730	17590096	177.83	36.8379	3.08322	33.4298	DEK2_peak_10129	AT2G42210	0
chr1	30223925	30225392	1469	30224561	172.47	35.9528	3.08262	32.6061	DEK2_peak_6916	AT1G80400	0
chr5	22282175	22283017	844	22282639	206.42	42.5829	3.07931	38.7587	DEK2_peak_24171	AT5G54850	0
chr3	19445539	19446728	1191	19446314	175.15	36.53	3.0763	33.146	DEK2_peak_14751	AT3G52460	-242
chr2	9386009	9386710	703	9386402	191.23	39.6403	3.07628	36.0366	DEK2_peak_7877	AT2G22080	0
chr4	11181746	11182286	542	11182023	181.4	37.6066	3.07502	34.1441	DEK2_peak_17449	AT4G20890	0
chr3	22771246	22771839	595	22771456	176.93	36.4443	3.0737	33.0646	DEK2_peak_15733	AT3G61520	0
chr1	7369630	7371953	2325	7370138	172.47	35.7971	3.07344	32.4588	DEK2_peak_2200	AT1G21060	0
chr1	461251	462050	801	461701	217.15	44.6782	3.07247	40.695	DEK2_peak_154	AT1G02320	0
chr1	1877466	1878070	606	1877764	210.89	43.054	3.07087	39.194	DEK2_peak_574	AT1G06148	0
chr4	17640427	17641422	997	17640984	176.04	36.6576	3.07051	33.26	DEK2_peak_19422	AT4G37540	0
chr2	7623338	7624269	933	7623724	190.34	39.2993	3.07024	35.7143	DEK2_peak_7495	AT2G17525	0
chr3	18391618	18392468	852	18391922	168	34.5885	3.06921	31.3291	DEK2_peak_14417	AT3G49610	-201
chr1	8026260	8027088	830	8026486	168	34.5885	3.06921	31.3291	DEK2_peak_2404	AT1G22680	0
chr3	8179698	8180257	561	8180066	168	34.5885	3.06921	31.3291	DEK2_peak_13290	AT3G23020	0
chr5	6126562	6127998	1438	6127215	168	34.5885	3.06921	31.3291	DEK2_peak_21570	AT5G18470	0
chr5	25415384	25416009	627	25415634	168	34.5885	3.06921	31.3291	DEK2_peak_25146	AT5G63460	0
chr5	4202685	4206169	3486	4204326	168	34.5885	3.06921	31.3291	DEK2_peak_21018	AT5G13190	236
chr4	11462365	11463154	791	11462858	173.36	35.9056	3.06646	32.5613	DEK2_peak_17503	AT4G21550	0
chr4	9276159	9277095	938	9276405	179.61	36.9078	3.06125	33.4964	DEK2_peak_16981	AT4G16444	0
chr4	16988895	16989758	865	16989262	217.15	44.4339	3.061	40.4704	DEK2_peak_19178	AT4G35860	0
chr3	9511049	9511916	869	9511376	169.78	34.8526	3.0578	31.5795	DEK2_peak_13606	AT3G26010	0
chr1	25875605	25876299	696	25875777	171.57	35.3018	3.05761	31.9974	DEK2_peak_5398	AT1G68830	-55
chr1	30310561	30311291	732	30310873	225.19	45.8787	3.05659	41.8147	DEK2_peak_6947	AT1G80630	0
chr1	9411142	9412321	1181	9411997	167.1	34.5885	3.05299	31.3291	DEK2_peak_2731	AT1G27100	0
chr3	21176884	21177593	711	21177400	167.1	34.5885	3.05299	31.3291	DEK2_peak_15291	AT3G57230	0
chr3	1470549	1471162	615	1470804	176.04	36.3423	3.05241	32.968	DEK2_peak_11329	AT3G05180	0
chr3	2518834	2520880	2048	2520425	186.76	38.0358	3.05092	34.5489	DEK2_peak_11655	AT3G07890	0
chr3	18498728	18499371	645	18499039	190.34	38.9332	3.05071	35.381	DEK2_peak_14455	AT3G49890	0
chr4	17486192	17486842	652	17486504	190.34	38.9141	3.04968	35.3624	DEK2_peak_19353	AT4G37110	0
chr3	22881436	22882336	902	22881941	221.61	44.8219	3.0495	40.8308	DEK2_peak_15772	AT3G61820	0
chr1	18326535	18327145	612	18326829	184.98	37.5462	3.04878	34.0933	DEK2_peak_3703	AT1G49510	0
chr1	28570222	28571256	1036	28570756	174.25	35.8217	3.0484	32.4822	DEK2_peak_6357	AT1G76140	0
chr2	16986424	16987469	1047	16986685	197.49	40.0827	3.04244	36.4484	DEK2_peak_9950	AT2G40720	0
chr4	6905158	6906171	1015	6905531	181.4	36.9805	3.04002	33.566	DEK2_peak_16552	AT4G11355	0
chr5	3105937	3106612	677	3106183	211.78	42.636	3.03977	38.8089	DEK2_peak_20689	AT5G09960	0
chr5	26640636	26641718	1084	26640870	221.61	44.6046	3.0395	40.6258	DEK2_peak_25595	AT5G66720	0
chr1	483188	484218	1032	483935	175.15	35.849	3.037	32.5081	DEK2_peak_168	AT1G02391	0
chr1	8175764	8176534	772	8176332	166.21	34.0949	3.03676	30.8758	DEK2_peak_2450	AT1G23070	0
chr1	24484733	24485333	602	24484990	166.21	34.0949	3.03676	30.8758	DEK2_peak_5012	AT1G65820	0
chr2	10135160	10137791	2633	10135533	166.21	34.0949	3.03676	30.8758	DEK2_peak_8080	AT2G23808	0
chr1	28540329	28541003	676	28540649	193.91	39.0532	3.03553	35.4947	DEK2_peak_6345	AT1G76050	0
chr2	8323727	8324337	612	8324054	168.89	34.2261	3.03376	30.9997	DEK2_peak_7656	AT2G19180	-379
chr5	26052583	26053481	900	26053194	179.61	36.4087	3.03308	33.0316	DEK2_peak_25374	AT5G65207	0
chr1	18321316	18322822	1508	18322360	177.83	35.9242	3.03096	32.5785	DEK2_peak_3701	AT1G49500	0
chr5	21310258	21311159	903	21310967	186.76	37.622	3.02843	34.1584	DEK2_peak_23884	AT5G52520	0
chr1	29346456	29347907	1453	29347103	199.27	40.2269	3.02697	36.5792	DEK2_peak_6636	AT1G78050	0
chr3	8788280	8788886	608	8788698	180.51	36.4902	3.02513	33.1081	DEK2_peak_13444	AT3G24255	0
chr1	5202032	5203050	1020	5202671	219.83	43.844	3.02501	39.9242	DEK2_peak_1603	AT1G15120	0
chr3	21411507	21412265	760	21411950	178.72	36.033	3.02448	32.6814	DEK2_peak_15361	AT3G57800	0
chr3	7892132	7892637	507	7892445	228.76	45.567	3.02438	41.5229	DEK2_peak_13206	AT3G22320	0
chr2	15105724	15106630	908	15106077	165.32	33.6039	3.02053	30.4198	DEK2_peak_9325	AT2G35960	-310
chr1	18700806	18702208	1404	18701232	165.32	33.6039	3.02053	30.4198	DEK2_peak_3781	AT1G50480	0
chr1	24847612	24848370	760	24847904	165.32	33.6039	3.02053	30.4198	DEK2_peak_5106	AT1G66600	0
chr1	26219412	26220459	1049	26219808	165.32	33.6039	3.02053	30.4198	DEK2_peak_5520	AT1G69700	0
chr1	27983433	27985628	2197	27984132	165.32	33.6039	3.02053	30.4198	DEK2_peak_6131	AT1G74453	0
chr4	8694994	8696763	1771	8695854	165.32	33.6039	3.02053	30.4198	DEK2_peak_16882	AT4G15236	0
chr5	24385874	24389652	3780	24388639	165.32	33.6039	3.02053	30.4198	DEK2_peak_24810	AT5G60680	0
chr3	4763491	4764325	836	4764044	190.34	38.3623	3.02037	34.8501	DEK2_peak_12308	AT3G14290	0
chr2	700871	701425	556	701132	173.36	35.0827	3.01852	31.7926	DEK2_peak_7125	AT2G02570	0
chr5	16296901	16297591	692	16297192	182.29	36.7592	3.01536	33.3562	DEK2_peak_22710	AT5G40720	-307
chr5	22923684	22924782	1100	22924162	185.87	37.1343	3.01402	33.7055	DEK2_peak_24350	AT5G56630	0
chr5	15902581	15903517	938	15903282	188.55	37.7004	3.00873	34.2331	DEK2_peak_22634	AT5G39740	0
chr5	20194983	20195411	430	20195229	196.59	39.1976	3.00841	35.6188	DEK2_peak_23657	AT5G49710	0
chr3	1254644	1255291	649	1255004	177.83	35.5081	3.00731	32.1916	DEK2_peak_11245	AT3G04610	0
chr3	1538425	1539671	1248	1538911	198.38	39.6075	3.00678	36.0048	DEK2_peak_11350	AT3G05370	0
chr3	376340	377071	733	376710	206.42	41.0954	3.00612	37.3873	DEK2_peak_10981	AT3G02120	-26
chr1	4418852	4419904	1054	4419214	215.36	42.7924	3.00497	38.9565	DEK2_peak_1321	AT1G12950	0
chr1	19295396	19296339	945	19295607	164.42	33.1154	3.0043	29.9648	DEK2_peak_3889	AT1G51930	-160
chr3	8308856	8309549	695	8309055	164.42	33.1154	3.0043	29.9648	DEK2_peak_13335	AT3G23250	0
chr4	2674766	2675267	503	2674935	164.42	33.1154	3.0043	29.9648	DEK2_peak_16372	AT4G05190	0
chr4	15861186	15862197	1013	15861551	164.42	33.1154	3.0043	29.9648	DEK2_peak_18821	AT4G32870	0
chr3	8263943	8264738	797	8264195	164.42	33.1154	3.0043	29.9648	DEK2_peak_13316	AT3G23165	322
chr3	105011	105475	466	105291	183.19	36.7761	3.00412	33.3719	DEK2_peak_10908	AT3G01316	-102
chr5	24585641	24586110	471	24585843	200.17	39.9639	3.00249	36.3367	DEK2_peak_24873	AT5G61120	0
chr1	29197295	29197874	581	29197606	171.57	34.315	2.99958	31.0839	DEK2_peak_6572	AT1G77682	-224
chr1	26796314	26797412	1100	26796865	176.04	35.3967	2.99843	32.0876	DEK2_peak_5741	AT1G71030	0
chr1	5077714	5078925	1213	5078578	179.61	35.7874	2.99819	32.4496	DEK2_peak_1558	AT1G14740	0
chr1	12246005	12246518	515	12246293	169.78	33.8176	2.99622	30.6211	DEK2_peak_3343	AT1G33780	0
chr4	14949875	14951064	1191	14950205	184.08	36.8499	2.99611	33.4412	DEK2_peak_18562	AT4G30620	0
chr1	26608068	26608751	685	26608444	173.36	34.6878	2.99565	31.4237	DEK2_peak_5666	AT1G70570	0
chr1	4461295	4461878	585	4461684	212.68	41.9163	2.99478	38.1435	DEK2_peak_1331	AT1G13090	0
chr4	11812820	11813400	582	11813059	176.04	35.3218	2.99417	32.0163	DEK2_peak_17603	AT4G22380	0
chr3	1197273	1198241	970	1197847	165.32	33.159	2.99356	30.0059	DEK2_peak_11228	AT3G04480	0
chr1	8863578	8864198	622	8863827	181.4	36.0829	2.99018	32.7246	DEK2_peak_2576	AT1G25280	0
chr5	1606070	1606674	606	1606438	207.32	40.9852	2.99003	37.2847	DEK2_peak_20255	AT5G05435	0
chr1	19527501	19527953	454	19527702	163.53	32.6295	2.98807	29.5129	DEK2_peak_3932	AT1G52420	0
chr1	23558807	23559598	793	23559193	163.53	32.6295	2.98807	29.5129	DEK2_peak_4792	AT1G63510	0
chr2	11380046	11380806	762	11380353	163.53	32.6295	2.98807	29.5129	DEK2_peak_8346	AT2G26710	0
chr5	4071078	4072116	1040	4071766	163.53	32.6295	2.98807	29.5129	DEK2_peak_20974	AT5G12890	0
chr5	22278197	22278990	795	22278578	163.53	32.6295	2.98807	29.5129	DEK2_peak_24168	AT5G54840	0
chr1	3909530	3910006	478	3909804	166.21	33.2511	2.98589	30.0928	DEK2_peak_1164	AT1G11610	-192
chr2	7489606	7490380	776	7490145	166.21	33.2147	2.98371	30.0588	DEK2_peak_7452	AT2G17220	0
chr2	10930860	10931322	464	10931080	168	33.0676	2.97766	29.926	DEK2_peak_8235	AT2G25670	0
chr3	20573479	20574033	556	20573845	168.89	33.2726	2.97688	30.1125	DEK2_peak_15093	AT3G55490	0
chr1	292771	293545	776	293110	196.59	38.5661	2.97606	35.0419	DEK2_peak_100	AT1G01800	0
chr4	11293769	11294334	567	11294037	171.57	33.9006	2.97537	30.6991	DEK2_peak_17464	AT4G21190	0
chr3	6671816	6672879	1065	6672588	162.64	32.1463	2.97184	29.0634	DEK2_peak_12905	AT3G19260	-297
chr2	18191277	18191903	628	18191566	162.64	32.1463	2.97184	29.0634	DEK2_peak_10332	AT2G43920	0
chr3	1354327	1354955	630	1354747	162.64	32.1463	2.97184	29.0634	DEK2_peak_11283	AT3G04910	0
chr3	8635866	8636412	548	8636130	162.64	32.1463	2.97184	29.0634	DEK2_peak_13414	AT3G23900	0
chr3	8947742	8948206	466	8947926	162.64	32.1463	2.97184	29.0634	DEK2_peak_13474	AT3G24530	0
chr2	17999626	18000392	768	18000069	203.74	39.6483	2.96726	36.0434	DEK2_peak_10260	AT2G43320	0
chr5	1500617	1501033	418	1500854	170.68	33.4983	2.96457	30.3271	DEK2_peak_20214	AT5G05080	0
chr4	14158326	14159010	686	14158661	162.64	32.0244	2.96436	28.9547	DEK2_peak_18308	AT4G28690	0
chr5	25179977	25181375	1400	25180918	215.36	41.9117	2.96381	38.1389	DEK2_peak_25067	AT5G62690	-40
chr5	25896483	25897066	585	25896697	215.36	41.9117	2.96381	38.1389	DEK2_peak_25318	AT5G64760	0
chr1	18354283	18354976	695	18354696	197.49	38.5163	2.96248	34.995	DEK2_peak_3710	AT1G49590	0
chr5	3168252	3168862	612	3168401	182.29	35.7728	2.96114	32.4371	DEK2_peak_20709	AT5G10110	0
chr5	8534771	8535402	633	8535104	179.61	35.1191	2.96089	31.824	DEK2_peak_22171	AT5G24840	0
chr2	1039999	1041037	1040	1040660	184.08	36.1823	2.95989	32.818	DEK2_peak_7190	AT2G03440	0
chr1	819233	819877	646	819454	192.12	37.6368	2.95931	34.1728	DEK2_peak_271	AT1G03330	0
chr2	19065173	19065894	723	19065535	209.1	40.78	2.95919	37.0921	DEK2_peak_10662	AT2G46450	0
chr4	7602522	7603177	657	7602874	209.1	40.78	2.95919	37.0921	DEK2_peak_16671	AT4G13020	0
chr4	16252827	16253318	493	16253091	190.34	37.1907	2.95858	33.7599	DEK2_peak_18925	AT4G33900	-116
chr1	1583578	1584160	584	1583865	222.51	43.0433	2.9584	39.1856	DEK2_peak_502	AT1G05385	0
chr1	18363123	18363627	506	18363264	179.61	35.0668	2.95798	31.7811	DEK2_peak_3712	AT1G49610	0
chr1	2454571	2455012	443	2454803	161.74	31.6657	2.95561	28.6162	DEK2_peak_756	AT1G07920	0
chr4	15412238	15414010	1774	15413122	161.74	31.6657	2.95561	28.6162	DEK2_peak_18701	AT4G31875	0
chr4	17628859	17629591	734	17629090	161.74	31.6657	2.95561	28.6162	DEK2_peak_19414	AT4G37510	0
chr2	18454654	18455370	718	18454955	176.93	34.3614	2.95472	31.1279	DEK2_peak_10432	AT2G44760	0
chr1	2338179	2338992	815	2338448	223.4	43.1307	2.95264	39.2659	DEK2_peak_717	AT1G07600	329
chr3	17974335	17975405	1072	17974709	184.98	35.7734	2.95199	32.4371	DEK2_peak_14322	AT3G48515	0
chr1	22867186	22871534	4350	22869260	168.89	32.8327	2.95082	29.7052	DEK2_peak_4621	AT1G61890	0
chr4	7260962	7261446	486	7261237	173.36	33.8931	2.94988	30.6919	DEK2_peak_16605	AT4G12120	0
chr4	14025070	14025656	588	14025414	165.32	32.419	2.94898	29.3207	DEK2_peak_18270	AT4G28340	0
chr4	17598572	17598937	367	17598774	173.36	33.8383	2.94674	30.6404	DEK2_peak_19403	AT4G37432	0
chr5	22307491	22310109	2620	22307825	206.42	39.8445	2.94525	36.2245	DEK2_peak_24179	AT5G54930	0
chr3	1763649	1764642	995	1764107	174.25	34.0248	2.94512	30.8167	DEK2_peak_11412	AT3G05900	0
chr5	7528506	7529397	893	7529210	240.38	46.0478	2.94365	41.9752	DEK2_peak_21919	AT5G22640	0
chr1	11219815	11220696	883	11220319	170.68	33.1331	2.94322	29.9811	DEK2_peak_3128	AT1G31340	-357
chr4	9308464	9309092	630	9308843	161.74	31.4539	2.94257	28.421	DEK2_peak_16992	AT4G16520	-2
chr5	24215304	24215957	655	24215609	201.95	38.694	2.94136	35.156	DEK2_peak_24761	AT5G60140	0
chr5	4954757	4955656	901	4955148	232.34	44.5427	2.94134	40.5688	DEK2_peak_21240	AT5G15260	0
chr4	9803421	9803888	469	9803585	170.68	33.0968	2.9411	29.9541	DEK2_peak_17116	AT4G17600	0
chr5	3833002	3834123	1123	3833864	222.51	42.6546	2.94088	38.8267	DEK2_peak_20912	AT5G11900	0
chr1	29649847	29650537	692	29650318	243.06	46.6132	2.94048	42.4994	DEK2_peak_6754	AT1G78865	0
chr2	17041974	17042846	874	17042517	193.02	37.472	2.93967	34.0232	DEK2_peak_9961	AT2G40830	0
chr1	6945066	6945785	721	6945487	160.85	31.1878	2.93938	28.1689	DEK2_peak_2088	AT1G20030	0
chr1	10516326	10516941	617	10516624	160.85	31.1878	2.93938	28.1689	DEK2_peak_2987	AT1G30020	0
chr2	16569135	16569722	589	16569378	160.85	31.1878	2.93938	28.1689	DEK2_peak_9812	AT2G39725	0
chr4	1140295	1140777	484	1140537	160.85	31.1878	2.93938	28.1689	DEK2_peak_16234	AT4G02590	0
chr2	18730280	18731005	727	18730593	187.66	36.1585	2.93812	32.7954	DEK2_peak_10543	AT2G45440	0
chr4	12393566	12394485	921	12394171	168.89	32.5608	2.93477	29.4546	DEK2_peak_17763	AT4G23810	0
chr4	17381756	17382808	1054	17382370	160.85	31.0861	2.9331	28.0797	DEK2_peak_19306	AT4G36890	0
chr1	2104123	2105231	1110	2104470	201.06	38.768	2.93207	35.2258	DEK2_peak_639	AT1G06850	0
chr5	6325261	6325916	657	6325488	164.42	31.9049	2.93095	28.8418	DEK2_peak_21616	AT5G18940	0
chr2	16686523	16687429	908	16686763	182.29	35.2081	2.93033	31.9093	DEK2_peak_9850	AT2G39970	0
chr5	19782225	19782810	587	19782568	189.44	36.4299	2.9299	33.0507	DEK2_peak_23554	AT5G48790	-175
chr3	3018585	3019527	944	3019208	193.02	37.2589	2.92871	33.8238	DEK2_peak_11788	AT3G09840	0
chr3	17177676	17179872	2198	17178432	186.76	35.7557	2.92803	32.4206	DEK2_peak_14139	AT3G46620	195
chr5	22861955	22862856	903	22862289	189.44	36.387	2.92765	33.0106	DEK2_peak_24336	AT5G56452	-137
chr2	18945042	18945871	831	18945520	201.06	38.6777	2.92761	35.1405	DEK2_peak_10610	AT2G46060	0
chr5	18040670	18041336	668	18040941	192.12	36.996	2.92613	33.5804	DEK2_peak_23146	AT5G44705	0
chr3	571774	572758	986	572456	215.36	41.0491	2.92376	37.3432	DEK2_peak_11048	AT3G02660	0
chr2	11282331	11284277	1948	11282975	159.95	30.7125	2.92315	27.727	DEK2_peak_8321	AT2G26530	0
chr2	13171669	13172383	716	13172208	159.95	30.7125	2.92315	27.727	DEK2_peak_8819	AT2G30945	0
chr2	16119099	16119629	532	16119300	159.95	30.7125	2.92315	27.727	DEK2_peak_9669	AT2G38500	0
chr3	8287390	8288013	625	8287655	159.95	30.7125	2.92315	27.727	DEK2_peak_13327	AT3G23220	0
chr4	9432228	9433031	805	9432639	159.95	30.7125	2.92315	27.727	DEK2_peak_17028	AT4G16765	0
chr5	4444535	4445465	932	4445167	213.57	40.6082	2.92299	36.9355	DEK2_peak_21082	AT5G13770	0
chr4	13137488	13139097	1611	13138037	174.25	33.5985	2.92087	30.4198	DEK2_peak_17994	AT4G25840	0
chr5	25109589	25110081	494	25109886	177.83	33.9699	2.92067	30.7652	DEK2_peak_25047	AT5G62560	0
chr4	10072975	10074017	1044	10073718	175.15	33.7584	2.91792	30.5649	DEK2_peak_17196	AT4G18205	0
chr5	17458671	17459455	786	17459168	173.36	33.2776	2.91467	30.1173	DEK2_peak_22980	AT5G43450	0
chr1	1028885	1029429	546	1029056	210	39.5777	2.91432	35.9768	DEK2_peak_338	AT1G04000	0
chr2	15147909	15149946	2039	15148173	161.74	30.985	2.91381	27.9841	DEK2_peak_9343	AT2G36070	0
chr4	11134039	11134855	818	11134552	179.61	34.2577	2.91313	31.0298	DEK2_peak_17435	AT4G20780	-69
chr5	412774	413564	792	413365	193.91	36.6674	2.91174	33.2692	DEK2_peak_19872	AT5G02100	0
chr3	16472146	16472883	739	16472553	197.49	37.4841	2.91035	34.0342	DEK2_peak_14030	AT3G45030	0
chr5	5011646	5012130	486	5011925	193.91	36.5786	2.90718	33.1917	DEK2_peak_21258	AT5G15440	0
chr1	26781807	26782506	701	26781986	159.06	30.7125	2.90692	27.727	DEK2_peak_5736	AT1G71010	-333
chr4	17707072	17707785	715	17707482	159.06	30.7125	2.90692	27.727	DEK2_peak_19449	AT4G37690	-109
chr1	760487	761260	775	760667	159.06	30.7125	2.90692	27.727	DEK2_peak_253	AT1G03160	-22
chr1	21440460	21443301	2843	21441694	159.06	30.7125	2.90692	27.727	DEK2_peak_4358	AT1G57980	0
chr1	25275984	25276626	644	25276210	159.06	30.7125	2.90692	27.727	DEK2_peak_5213	AT1G67480	0
chr2	7516007	7516734	729	7516457	159.06	30.7125	2.90692	27.727	DEK2_peak_7464	AT2G17290	0
chr3	20478356	20479388	1034	20479004	159.06	30.7125	2.90692	27.727	DEK2_peak_15060	AT3G55250	0
chr5	1179862	1180324	464	1180123	159.06	30.7125	2.90692	27.727	DEK2_peak_20121	AT5G04260	0
chr3	20563605	20564358	755	20564064	196.59	37.1825	2.90577	33.752	DEK2_peak_15090	AT3G55470	0
chr5	23306503	23308516	2015	23308083	208.21	39.4456	2.90568	35.8527	DEK2_peak_24473	AT5G57560	0
chr5	16003939	16004444	507	16004193	168.89	32.0592	2.90526	28.9874	DEK2_peak_22652	AT5G39990	0
chr1	24148741	24149563	824	24149175	159.06	30.6655	2.90402	27.6962	DEK2_peak_4956	AT1G65010	0
chr3	3324749	3325534	787	3325215	210.89	39.569	2.90392	35.9688	DEK2_peak_11864	AT3G10640	0
chr4	1229835	1230424	591	1230146	192.12	36.5522	2.90325	33.1666	DEK2_peak_16248	AT4G02770	0
chr5	4827958	4828947	991	4828385	199.27	37.7483	2.90251	34.2784	DEK2_peak_21200	AT5G14930	0
chr1	8556098	8557520	1424	8556725	190.34	36.0507	2.89905	32.6979	DEK2_peak_2530	AT1G24160	0
chr2	9253973	9254660	689	9254370	159.95	30.2913	2.89706	27.3433	DEK2_peak_7855	AT2G21640	0
chr3	1490924	1492341	1419	1491961	183.19	34.8033	2.89695	31.5328	DEK2_peak_11339	AT3G05230	0
chr1	18504443	18505150	709	18504653	204.63	38.41	2.89627	34.8955	DEK2_peak_3747	AT1G49970	0
chr3	17157610	17158157	549	17157860	184.98	34.7242	2.89542	31.4583	DEK2_peak_14135	AT3G46600	0
chr2	18183904	18184517	615	18184142	181.4	34.3526	2.89526	31.1198	DEK2_peak_10328	AT2G43900	-33
chr2	7971956	7972700	746	7972366	181.4	34.3526	2.89526	31.1198	DEK2_peak_7574	AT2G18350	0
chr2	16471022	16471786	766	16471292	181.4	34.3526	2.89526	31.1198	DEK2_peak_9769	AT2G39445	0
chr4	333355	333984	631	333641	207.32	38.9757	2.89327	35.4212	DEK2_peak_16029	AT4G00760	0
chr1	341929	342679	752	342404	210.89	39.3398	2.89309	35.7526	DEK2_peak_114	AT1G01980	0
chr2	11571621	11572621	1002	11572424	185.87	34.8753	2.89231	31.6006	DEK2_peak_8385	AT2G27090	0
chr4	10393761	10394311	552	10393966	184.08	34.9187	2.89191	31.6418	DEK2_peak_17287	AT4G18975	0
chr1	11293616	11294148	534	11293828	158.17	30.2399	2.8907	27.2949	DEK2_peak_3142	AT1G31540	0
chr2	11816509	11816964	457	11816707	158.17	30.2399	2.8907	27.2949	DEK2_peak_8436	AT2G27710	0
chr2	17946613	17948253	1642	17947491	158.17	30.2399	2.8907	27.2949	DEK2_peak_10243	AT2G43160	0
chr3	4311184	4314123	2941	4313895	158.17	30.2399	2.8907	27.2949	DEK2_peak_12158	AT3G13310	0
chr5	24462395	24463323	930	24463053	158.17	30.2399	2.8907	27.2949	DEK2_peak_24832	AT5G60800	0
chr5	16589289	16589802	515	16589530	160.85	30.3887	2.89015	27.435	DEK2_peak_22797	AT5G41450	-195
chr1	10512938	10513518	582	10513201	206.42	38.7003	2.89009	35.1619	DEK2_peak_2986	AT1G30010	0
chr3	1040188	1041114	928	1040498	247.53	45.9537	2.88986	41.8859	DEK2_peak_11184	AT3G04020	0
chr2	14190104	14190658	556	14190340	191.23	36.0819	2.88982	32.7246	DEK2_peak_9070	AT2G33500	0
chr4	13444787	13445316	531	13445047	161.74	30.5761	2.88882	27.6111	DEK2_peak_18090	AT4G26650	0
chr3	2595416	2595884	470	2595651	169.78	31.9802	2.88838	28.9132	DEK2_peak_11671	AT3G08530	0
chr5	5718451	5720423	1974	5718795	164.42	31.1888	2.88797	28.1698	DEK2_peak_21458	AT5G17350	0
chr3	9131827	9132587	762	9132202	201.06	37.8444	2.88658	34.3685	DEK2_peak_13510	AT3G25070	0
chr4	12255704	12257305	1603	12255941	159.06	30.3622	2.88534	27.4101	DEK2_peak_17716	AT4G23493	0
chr3	20841590	20842059	471	20841828	176.93	33.1096	2.88431	29.9648	DEK2_peak_15175	AT3G56160	-49
chr1	19052223	19053148	927	19052795	241.27	44.8237	2.8842	40.8324	DEK2_peak_3842	AT1G51400	0
chr1	1558593	1560771	2180	1559187	169.78	31.8922	2.88326	28.8299	DEK2_peak_495	AT1G05340	0
chr3	6116282	6117200	920	6116894	183.19	34.5378	2.88267	31.2949	DEK2_peak_12748	AT3G17850	0
chr4	16349809	16350920	1113	16350569	202.85	37.7093	2.88246	34.2416	DEK2_peak_18964	AT4G34138	0
chr2	286379	286879	502	286671	192.12	36.1472	2.88245	32.7845	DEK2_peak_7047	AT2G01650	0
chr2	15546019	15546689	672	15546517	162.64	30.6568	2.88106	27.6879	DEK2_peak_9472	AT2G37020	0
chr1	20180144	20180921	779	20180666	193.02	36.3134	2.88031	32.9414	DEK2_peak_4094	AT1G54050	0
chr3	856371	856901	532	856724	196.59	36.6617	2.87952	33.264	DEK2_peak_11137	AT3G03560	0
chr4	13014872	13016684	1814	13015163	168.89	31.6178	2.87941	28.5765	DEK2_peak_17957	AT4G25470	0
chr1	20706395	20707537	1144	20707230	186.76	34.8158	2.87808	31.545	DEK2_peak_4208	AT1G55450	0
chr5	25361432	25361978	548	25361705	166.21	31.4206	2.87698	28.3893	DEK2_peak_25130	AT5G63260	0
chr1	19644890	19645514	626	19645233	197.49	36.8113	2.87661	33.405	DEK2_peak_3957	AT1G52740	0
chr2	10927503	10928002	501	10927794	160.85	30.1607	2.87618	27.2259	DEK2_peak_8233	AT2G25660	-113
chr5	15975927	15976650	725	15976279	185.87	34.5487	2.87491	31.3049	DEK2_peak_22647	AT5G39895	0
chr3	6336490	6336932	444	6336661	157.27	29.77	2.87447	26.8578	DEK2_peak_12812	AT3G18480	0
chr3	20940731	20941825	1096	20941308	157.27	29.77	2.87447	26.8578	DEK2_peak_15208	AT3G56490	0
chr4	1203123	1204432	1311	1203376	157.27	29.77	2.87447	26.8578	DEK2_peak_16244	AT4G02715	0
chr4	8406924	8407977	1055	8407759	157.27	29.77	2.87447	26.8578	DEK2_peak_16815	AT4G14660	0
chr5	20132550	20133033	485	20132739	157.27	29.77	2.87447	26.8578	DEK2_peak_23646	AT5G49610	0
chr5	21088328	21089583	1257	21089244	157.27	29.77	2.87447	26.8578	DEK2_peak_23824	AT5G51880	0
chr2	977239	978008	771	977639	182.29	34.1579	2.87341	30.9362	DEK2_peak_7173	AT2G03240	0
chr2	16101530	16102256	728	16101870	193.02	36.1728	2.87315	32.8088	DEK2_peak_9659	AT2G38450	0
chr2	14310123	14311105	984	14310820	162.64	30.5163	2.87256	27.5547	DEK2_peak_9108	AT2G33830	0
chr1	24631099	24631676	579	24631398	176.93	32.8514	2.86989	29.7221	DEK2_peak_5049	AT1G66150	0
chr5	21285128	21286988	1862	21286700	182.29	34.0354	2.8668	30.8271	DEK2_peak_23875	AT5G52430	0
chr3	5687320	5687859	541	5687617	236.8	43.3295	2.86511	39.4525	DEK2_peak_12619	AT3G16700	0
chr4	17979953	17981043	1092	17980552	210	38.5256	2.86446	35.0037	DEK2_peak_19534	AT4G38405	0
chr4	12381475	12382101	628	12381834	168	31.1537	2.86436	28.1424	DEK2_peak_17759	AT4G23760	0
chr1	17866989	17867469	482	17867198	162.64	30.3764	2.86412	27.4235	DEK2_peak_3607	AT1G48350	0
chr3	731083	732257	1176	731525	196.59	36.346	2.86366	32.9715	DEK2_peak_11103	AT3G03170	0
chr4	14301967	14302603	638	14302359	184.98	34.0842	2.86116	30.8718	DEK2_peak_18344	AT4G29010	0
chr5	3753061	3754534	1475	3754234	161.74	30.1202	2.86109	27.1886	DEK2_peak_20888	AT5G11670	0
chr3	3481417	3482810	1395	3481934	176.04	32.9345	2.86009	29.8006	DEK2_peak_11916	AT3G11120	365
chr1	4709238	4710204	968	4709562	173.36	32.2856	2.85834	29.1952	DEK2_peak_1413	AT1G13720	0
chr1	30341736	30342246	512	30342023	156.38	29.3029	2.85824	26.4244	DEK2_peak_6954	AT1G80740	-148
chr4	11902422	11903708	1288	11903372	156.38	29.3029	2.85824	26.4244	DEK2_peak_17617	AT4G22610	0
chr5	7436465	7437095	632	7436733	156.38	29.3029	2.85824	26.4244	DEK2_peak_21901	AT5G22440	0
chr2	9537826	9538548	724	9538072	195.7	36.0227	2.85775	32.6715	DEK2_peak_7918	AT2G22470	331
chr5	22245442	22246559	1119	22245931	157.27	29.4961	2.85745	26.6064	DEK2_peak_24157	AT5G54770	-33
chr3	22665857	22666326	471	22666124	167.1	31.274	2.85623	28.2499	DEK2_peak_15703	AT3G61240	0
chr3	2832907	2833445	540	2833172	204.63	37.5783	2.85604	34.1231	DEK2_peak_11733	AT3G09230	0
chr1	7250203	7251999	1798	7251697	176.04	32.8514	2.85548	29.7221	DEK2_peak_2170	AT1G20850	-175
chr5	22721005	22721530	527	22721205	157.27	29.4612	2.85528	26.5736	DEK2_peak_24300	AT5G56120	0
chr5	3409874	3410551	679	3410245	169.78	31.4035	2.85492	28.3727	DEK2_peak_20782	AT5G10790	0
chr2	19480793	19481517	726	19481172	184.08	34.2164	2.85444	30.9907	DEK2_peak_10821	AT2G47470	0
chr1	27358731	27359539	810	27359031	172.47	31.9627	2.85169	28.8963	DEK2_peak_5928	AT1G72670	0
chr5	23681665	23682415	752	23682015	167.1	31.1869	2.85115	28.1689	DEK2_peak_24589	AT5G58590	0
chr1	4492440	4493195	757	4492984	168	30.927	2.85107	27.9297	DEK2_peak_1338	AT1G13170	0
chr1	26434238	26435598	1362	26434440	195.7	35.8829	2.85071	32.5395	DEK2_peak_5601	AT1G70200	0
chr3	3089844	3091358	1516	3090629	179.61	33.1115	2.85015	29.9648	DEK2_peak_11809	AT3G10015	0
chr2	19150900	19151910	1012	19151109	181.4	33.5187	2.85002	30.3456	DEK2_peak_10693	AT2G46650	0
chr2	18855173	18856013	842	18855616	212.68	38.8113	2.84903	35.2659	DEK2_peak_10584	AT2G45780	0
chr3	3016210	3016787	579	3016462	173.36	32.0971	2.8477	29.0229	DEK2_peak_11787	AT3G09830	0
chr3	9827167	9827980	815	9827535	157.27	29.322	2.84665	26.442	DEK2_peak_13687	AT3G26740	0
chr2	15226604	15229202	2600	15227319	169.78	31.2562	2.84641	28.2331	DEK2_peak_9372	AT2G36310	0
chr5	2637162	2637773	613	2637444	179.61	33.0424	2.84638	29.9028	DEK2_peak_20554	AT5G08200	-263
chr1	19225562	19226251	691	19225965	164.42	30.4887	2.84623	27.5284	DEK2_peak_3884	AT1G51805	0
chr1	26127725	26128464	741	26128115	176.93	32.4146	2.84557	29.3164	DEK2_peak_5486	AT1G69520	0
chr2	12493109	12493511	404	12493308	186.76	34.1872	2.84489	30.9627	DEK2_peak_8634	AT2G29080	0
chr3	8181520	8182267	749	8182002	172.47	31.8219	2.84369	28.7628	DEK2_peak_13293	AT3G23030	0
chr1	20718934	20719802	870	20719238	179.61	32.9907	2.84355	29.8537	DEK2_peak_4210	AT1G55490	0
chr5	26169112	26170248	1138	26169920	156.38	29.0662	2.84347	26.2064	DEK2_peak_25413	AT5G65460	-111
chr3	1854809	1855503	696	1855096	155.49	28.8384	2.84201	25.9918	DEK2_peak_11449	AT3G06130	0
chr5	7255874	7257534	1662	7257279	155.49	28.8384	2.84201	25.9918	DEK2_peak_21851	AT5G21950	0
chr1	26538644	26540106	1464	26539078	237.7	42.9719	2.84164	39.118	DEK2_peak_5641	AT1G70410	-311
chr4	15941209	15941747	540	15941422	159.95	29.3841	2.84121	26.501	DEK2_peak_18851	AT4G33040	0
chr5	2027833	2028834	1003	2028598	160.85	29.559	2.83944	26.6656	DEK2_peak_20394	AT5G06600	0
chr3	3303874	3304413	541	3304121	209.1	38.2464	2.83923	34.741	DEK2_peak_11857	AT3G10572	0
chr4	12521074	12521922	850	12521628	170.68	31.3311	2.83897	28.305	DEK2_peak_17818	AT4G24110	-261
chr1	6388051	6390236	2187	6388347	164.42	30.3505	2.83802	27.3986	DEK2_peak_1915	AT1G18570	0
chr5	25735815	25736551	738	25736195	194.81	35.422	2.83776	32.1109	DEK2_peak_25259	AT5G64350	0
chr2	13327177	13327829	654	13327532	169.78	31.0933	2.837	28.0867	DEK2_peak_8861	AT2G31260	0
chr3	2711776	2712526	752	2712077	239.49	43.2477	2.83625	39.3754	DEK2_peak_11706	AT3G08910	0
chr4	18293577	18294057	482	18293851	180.51	33.0567	2.83606	29.9157	DEK2_peak_19638	AT4G39345	0
chr4	16788333	16789140	809	16788528	178.72	32.6499	2.83605	29.5321	DEK2_peak_19118	AT4G35280	-50
chr1	28766063	28768075	2014	28767409	178.72	32.6499	2.83605	29.5321	DEK2_peak_6427	AT1G76650	63
chr3	11005355	11006820	1467	11006606	168	30.6693	2.836	27.6993	DEK2_peak_13887	AT3G29000	0
chr3	469001	470225	1226	469781	214.46	38.9157	2.83506	35.3639	DEK2_peak_11014	AT3G02315	0
chr3	19772241	19773000	761	19772608	158.17	29.3181	2.83383	26.4384	DEK2_peak_14865	AT3G53320	0
chr1	2000445	2001550	1107	2000753	161.74	29.6539	2.83286	26.7552	DEK2_peak_613	AT1G06530	-44
chr3	4982165	4983138	975	4982547	168.89	30.7953	2.83151	27.8051	DEK2_peak_12384	AT3G14830	0
chr3	6875577	6876266	691	6875933	185.87	33.7271	2.83135	30.5359	DEK2_peak_12960	AT3G19790	0
chr1	4224918	4225758	842	4225272	202.85	36.6572	2.83122	33.2597	DEK2_peak_1264	AT1G12411	0
chr5	20474206	20474606	402	20474457	174.25	32.0077	2.83122	28.9387	DEK2_peak_23700	AT5G50310	0
chr1	27288286	27288763	479	27288535	171.57	31.3631	2.82918	28.3349	DEK2_peak_5899	AT1G72480	0
chr3	20556154	20558058	1906	20556979	166.21	30.6029	2.82894	27.6362	DEK2_peak_15087	AT3G55450	0
chr3	9469850	9470483	635	9470232	194.81	35.2189	2.82751	31.919	DEK2_peak_13587	AT3G25880	0
chr5	23161705	23163597	1894	23161953	208.21	37.7865	2.82715	34.314	DEK2_peak_24429	AT5G57160	0
chr2	7641089	7641702	615	7641343	174.25	31.9261	2.82665	28.8616	DEK2_peak_7502	AT2G17556	-318
chr3	19322552	19323608	1058	19323155	185.87	33.629	2.82617	30.443	DEK2_peak_14709	AT3G52105	0
chr5	23384060	23384736	678	23384384	154.59	28.3768	2.82578	25.5605	DEK2_peak_24507	AT5G57710	-58
chr4	13653148	13653750	604	13653539	154.59	28.3768	2.82578	25.5605	DEK2_peak_18140	AT4G27260	0
chr5	20030069	20030855	788	20030647	154.59	28.3768	2.82578	25.5605	DEK2_peak_23610	AT5G49400	0
chr5	24185424	24185878	456	24185639	154.59	28.3768	2.82578	25.5605	DEK2_peak_24752	AT5G60050	0
chr3	22715076	22716303	1229	22715598	193.91	34.9633	2.82481	31.6835	DEK2_peak_15719	AT3G61389	0
chr5	21509371	21510297	928	21509642	193.91	34.9633	2.82481	31.6835	DEK2_peak_23936	AT5G53045	0
chr3	2177305	2178580	1277	2178204	191.23	34.7457	2.82124	31.4779	DEK2_peak_11555	AT3G06895	0
chr3	9964605	9965021	418	9964815	167.1	30.6693	2.821	27.6993	DEK2_peak_13719	AT3G27020	-8
chr5	3407949	3408453	506	3408186	174.25	31.8194	2.82069	28.7609	DEK2_peak_20781	AT5G10780	0
chr2	17624431	17625186	757	17624995	196.59	35.4552	2.81912	32.1411	DEK2_peak_10140	AT2G42310	-26
chr1	602096	602745	651	602443	243.95	43.3808	2.81912	39.4892	DEK2_peak_208	AT1G02750	0
chr4	16371196	16372190	996	16371848	201.95	36.1998	2.81881	32.8339	DEK2_peak_18972	AT4G34180	0
chr1	26451739	26453018	1281	26452719	189.44	34.2885	2.81846	31.0589	DEK2_peak_5611	AT1G70250	0
chr5	26957526	26958200	676	26957819	187.66	33.8824	2.81829	30.6822	DEK2_peak_25735	AT5G67580	0
chr1	6814308	6814977	671	6814644	185.87	33.4763	2.81811	30.3061	DEK2_peak_2046	AT1G19710	0
chr4	8874990	8876099	1111	8875742	169.78	30.7351	2.81636	27.7485	DEK2_peak_16898	AT4G15545	0
chr4	16890620	16891307	689	16890988	243.95	43.2926	2.81556	39.418	DEK2_peak_19145	AT4G35580	0
chr1	26401777	26403385	1610	26402590	170.68	30.9214	2.8155	27.9245	DEK2_peak_5591	AT1G70100	0
chr1	9143220	9144110	892	9143482	159.06	29.2127	2.815	26.3436	DEK2_peak_2652	AT1G26420	0
chr1	19906974	19907611	639	19907229	165.32	30.1601	2.81482	27.2252	DEK2_peak_4029	AT1G53360	0
chr3	7312515	7313072	559	7312780	170.68	30.902	2.81439	27.9059	DEK2_peak_13059	AT3G20870	0
chr1	3057853	3058699	848	3058428	165.32	30.1431	2.81382	27.2092	DEK2_peak_915	AT1G09480	0
chr5	19163706	19164746	1042	19163914	190.34	34.3986	2.81378	31.163	DEK2_peak_23390	AT5G47180	0
chr5	16645622	16646362	742	16645939	170.68	30.8536	2.81163	27.8604	DEK2_peak_22813	AT5G41620	0
chr4	14539575	14540217	644	14539904	190.34	34.3559	2.81159	31.1229	DEK2_peak_18408	AT4G29680	0
chr5	26357781	26358348	569	26358042	174.25	31.6492	2.81119	28.6064	DEK2_peak_25490	AT5G65900	0
chr5	24347396	24347969	575	24347821	156.38	28.5335	2.81036	25.709	DEK2_peak_24796	AT5G60570	0
chr3	187970	188583	615	188278	176.04	32.0321	2.81015	28.9613	DEK2_peak_10926	AT3G01480	0
chr5	22604910	22605890	982	22605325	153.7	27.9179	2.80955	25.1337	DEK2_peak_24266	AT5G55855	-364
chr5	1911611	1912207	598	1911910	153.7	27.9179	2.80955	25.1337	DEK2_peak_20348	AT5G06270	-343
chr1	7789153	7789790	639	7789369	153.7	27.9179	2.80955	25.1337	DEK2_peak_2323	AT1G22070	0
chr1	22722937	22723526	591	22723166	153.7	27.9179	2.80955	25.1337	DEK2_peak_4589	AT1G61580	0
chr3	1992685	1993360	677	1993094	153.7	27.9179	2.80955	25.1337	DEK2_peak_11490	AT3G06483	0
chr3	17689417	17690282	867	17689934	153.7	27.9179	2.80955	25.1337	DEK2_peak_14260	AT3G47940	0
chr3	22461640	22462290	652	22461801	153.7	27.9179	2.80955	25.1337	DEK2_peak_15660	AT3G60770	0
chr4	12730677	12731859	1184	12731654	153.7	27.9179	2.80955	25.1337	DEK2_peak_17869	AT4G24670	0
chr4	15242817	15243357	542	15243162	153.7	27.9179	2.80955	25.1337	DEK2_peak_18641	AT4G31408	0
chr5	1215661	1216729	1070	1216127	153.7	27.9179	2.80955	25.1337	DEK2_peak_20132	AT5G04340	377
chr3	22322430	22323551	1123	22323152	161.74	29.2623	2.80924	26.3912	DEK2_peak_15608	AT3G60390	0
chr1	20851654	20852152	500	20851903	160.85	29.0591	2.80909	26.1999	DEK2_peak_4245	AT1G55770	-88
chr3	20775778	20779412	3636	20777992	237.7	42.1655	2.80821	38.3758	DEK2_peak_15153	AT3G55980	0
chr2	12408127	12408568	443	12408387	159.06	29.099	2.80809	26.2365	DEK2_peak_8606	AT2G28890	0
chr4	10104307	10105332	1027	10104956	159.06	29.099	2.80809	26.2365	DEK2_peak_17205	AT4G18280	311
chr1	11577687	11578570	885	11577985	153.7	27.8735	2.80675	25.0966	DEK2_peak_3208	AT1G32172	0
chr5	2580022	2580628	608	2580419	243.06	43.2926	2.80528	39.418	DEK2_peak_20535	AT5G08060	0
chr5	5360525	5361110	587	5360771	203.74	36.2847	2.80352	32.9143	DEK2_peak_21361	AT5G16380	0
chr1	27603524	27603887	365	27603722	154.59	28.0091	2.80267	25.2193	DEK2_peak_6007	AT1G73430	0
chr1	2702925	2703554	631	2703278	194.81	34.6166	2.79722	31.3558	DEK2_peak_820	AT1G08540	0
chr4	15803785	15804909	1126	15804639	169.78	30.3978	2.79699	27.4439	DEK2_peak_18807	AT4G32765	0
chr3	9492476	9492924	450	9492715	175.15	31.5752	2.79597	28.5354	DEK2_peak_13598	AT3G25920	0
chr2	11277376	11278159	785	11277744	201.95	35.7123	2.79513	32.3791	DEK2_peak_8318	AT2G26511	0
chr1	1926304	1926752	450	1926527	177.83	31.7018	2.79509	28.6491	DEK2_peak_593	AT1G06310	-39
chr3	10017066	10017569	505	10017315	155.49	28.0765	2.79441	25.2829	DEK2_peak_13727	AT3G27160	0
chr5	24487645	24488052	409	24487800	155.49	28.0765	2.79441	25.2829	DEK2_peak_24845	AT5G60870	0
chr5	171055	171833	780	171393	185.87	33.0223	2.79422	29.8841	DEK2_peak_19793	AT5G01400	0
chr3	4709883	4710685	804	4710398	177.83	31.6851	2.79417	28.6339	DEK2_peak_12286	AT3G14190	0
chr4	10309406	10310165	761	10309616	188.55	33.6135	2.79395	30.429	DEK2_peak_17267	AT4G18760	0
chr3	10848035	10848537	504	10848193	152.81	27.4617	2.79332	24.7075	DEK2_peak_13868	AT3G28850	-132
chr1	18182016	18183661	1647	18182682	152.81	27.4617	2.79332	24.7075	DEK2_peak_3668	AT1G49160	0
chr5	6997433	6998264	833	6997613	152.81	27.4617	2.79332	24.7075	DEK2_peak_21787	AT5G20680	0
chr5	8187094	8188783	1691	8188423	152.81	27.4617	2.79332	24.7075	DEK2_peak_22091	AT5G24165	0
chr5	18866429	18867897	1470	18867195	152.81	27.4617	2.79332	24.7075	DEK2_peak_23316	AT5G46520	0
chr5	26367847	26369167	1322	26368217	152.81	27.4617	2.79332	24.7075	DEK2_peak_25495	AT5G65925	0
chr1	4289363	4290664	1303	4290006	152.81	27.4617	2.79332	24.7075	DEK2_peak_1287	AT1G12610	353
chr5	25398781	25400471	1692	25400275	202.85	35.8552	2.79243	32.5138	DEK2_peak_25140	AT5G63420	0
chr3	5830145	5831389	1246	5830655	180.51	32.2494	2.79242	29.1612	DEK2_peak_12669	AT3G17100	0
chr5	2325281	2325787	508	2325476	183.19	32.8177	2.79094	29.6909	DEK2_peak_20478	AT5G07350	0
chr1	19956372	19957161	791	19956845	183.19	32.8138	2.79073	29.687	DEK2_peak_4040	AT1G53460	0
chr3	4461720	4462465	747	4462100	180.51	32.2096	2.79028	29.1235	DEK2_peak_12213	AT3G13640	0
chr3	23236600	23237261	663	23236927	201.95	35.6124	2.79028	32.2842	DEK2_peak_15891	AT3G62840	0
chr2	8512866	8513750	886	8513491	185.87	32.9246	2.78909	29.791	DEK2_peak_7689	AT2G19740	0
chr4	13163206	13164060	856	13163773	184.98	32.6864	2.78699	29.5667	DEK2_peak_18002	AT4G25910	0
chr1	2316235	2316686	453	2316479	162.64	29.0451	2.78429	26.1863	DEK2_peak_711	AT1G07530	0
chr2	14302335	14303568	1235	14302527	206.42	36.4746	2.78419	33.0937	DEK2_peak_9104	AT2G33800	0
chr5	16250667	16251168	503	16250908	155.49	27.8927	2.78298	25.1145	DEK2_peak_22702	AT5G40580	0
chr1	194277	195801	1526	194802	178.72	31.6709	2.78257	28.6205	DEK2_peak_73	AT1G01540	0
chr1	11930914	11932599	1687	11932035	174.25	31.1208	2.78178	28.1125	DEK2_peak_3289	AT1G32928	0
chr4	14406374	14407398	1026	14406836	176.93	31.2327	2.78021	28.2117	DEK2_peak_18380	AT4G29220	0
chr5	19165947	19166976	1031	19166217	176.93	31.2327	2.78021	28.2117	DEK2_peak_23391	AT5G47190	0
chr1	11928456	11930452	1998	11929045	201.95	35.4039	2.78019	32.0939	DEK2_peak_3288	AT1G32920	0
chr2	18576605	18577472	869	18577028	175.15	31.2797	2.77964	28.2555	DEK2_peak_10475	AT2G45040	-178
chr1	2189355	2191219	1866	2190433	182.29	32.3606	2.77719	29.266	DEK2_peak_672	AT1G07135	0
chr1	7324253	7324764	513	7324524	151.91	27.0084	2.77709	24.2843	DEK2_peak_2184	AT1G20980	0
chr1	10151289	10152004	717	10151790	151.91	27.0084	2.77709	24.2843	DEK2_peak_2895	AT1G29071	0
chr2	10079877	10080428	553	10080253	151.91	27.0084	2.77709	24.2843	DEK2_peak_8065	AT2G23700	0
chr2	14702151	14702600	451	14702321	151.91	27.0084	2.77709	24.2843	DEK2_peak_9208	AT2G34840	0
chr2	18623414	18624500	1088	18624231	151.91	27.0084	2.77709	24.2843	DEK2_peak_10498	AT2G45170	0
chr4	14857775	14858599	826	14858159	151.91	27.0084	2.77709	24.2843	DEK2_peak_18524	AT4G30360	0
chr5	6061437	6062089	654	6061717	151.91	27.0084	2.77709	24.2843	DEK2_peak_21553	AT5G18310	0
chr5	22816811	22817879	1070	22817433	151.91	27.0084	2.77709	24.2843	DEK2_peak_24330	AT5G56340	0
chr5	22997816	22998931	1117	22998057	151.91	27.0084	2.77709	24.2843	DEK2_peak_24372	AT5G56865	0
chr4	17008001	17008602	603	17008256	210	36.6437	2.77627	33.2477	DEK2_peak_19186	AT4G35905	0
chr5	22123138	22124712	1576	22124409	184.98	32.4733	2.77575	29.3721	DEK2_peak_24122	AT5G54500	0
chr1	23995429	23996027	600	23995776	237.7	41.3737	2.77556	37.6418	DEK2_peak_4919	AT1G64600	0
chr2	9102840	9103364	526	9103081	170.68	30.2168	2.77536	27.2792	DEK2_peak_7824	AT2G21240	0
chr1	19969444	19969930	488	19969647	173.36	30.8078	2.77535	27.8174	DEK2_peak_4041	AT1G53500	0
chr3	8734342	8735075	735	8734704	160.85	28.49	2.7747	25.6681	DEK2_peak_13436	AT3G24170	0
chr4	393246	393863	619	393533	187.66	33.0369	2.77436	29.8977	DEK2_peak_16042	AT4G00920	0
chr5	6056986	6057924	940	6057335	162.64	28.8635	2.77348	26.0156	DEK2_peak_21550	AT5G18300	0
chr5	32606	33030	426	32828	157.27	28.1313	2.77333	25.3349	DEK2_peak_19750	AT5G01090	0
chr1	19304912	19305565	655	19305148	165.32	29.4278	2.77194	26.5429	DEK2_peak_3893	AT1G51950	0
chr2	11999605	12000083	480	11999791	165.32	29.4278	2.77194	26.5429	DEK2_peak_8489	AT2G28150	0
chr3	9536699	9537200	503	9536993	160.85	28.4403	2.77171	25.6212	DEK2_peak_13614	AT3G26100	0
chr5	7967919	7968562	645	7968206	220.72	38.4463	2.7715	34.9298	DEK2_peak_22031	AT5G23630	0
chr1	1261296	1261803	509	1261580	240.38	41.8579	2.77128	38.0886	DEK2_peak_410	AT1G04590	0
chr2	9516031	9517828	1799	9516380	168	29.541	2.77045	26.6484	DEK2_peak_7911	AT2G22426	0
chr1	9448581	9449730	1151	9449446	162.64	28.7957	2.76945	25.9568	DEK2_peak_2741	AT1G27190	0
chr1	27337740	27338239	501	27338070	152.81	27.0847	2.76943	24.3563	DEK2_peak_5918	AT1G72600	0
chr5	2236720	2237553	835	2237242	159.95	28.2048	2.76935	25.4044	DEK2_peak_20456	AT5G07190	0
chr1	26300117	26300800	685	26300528	170.68	30.1049	2.769	27.1737	DEK2_peak_5555	AT1G69850	0
chr2	9162279	9162698	421	9162526	170.68	30.1049	2.769	27.1737	DEK2_peak_7837	AT2G21410	0
chr5	22728770	22729215	447	22729019	170.68	30.1049	2.769	27.1737	DEK2_peak_24303	AT5G56150	0
chr3	20189470	20190036	568	20189751	164.42	29.1676	2.76821	26.3025	DEK2_peak_14989	AT3G54540	0
chr5	1640715	1641335	622	1641009	204.63	35.7393	2.768	32.4049	DEK2_peak_20265	AT5G05550	-109
chr1	18308732	18309296	566	18308937	173.36	30.6688	2.7676	27.6989	DEK2_peak_3697	AT1G49460	0
chr1	2366350	2367560	1212	2366639	153.7	27.2377	2.76669	24.5009	DEK2_peak_729	AT1G07650	0
chr4	148202	149006	806	148733	190.34	33.4698	2.76635	30.2999	DEK2_peak_15991	AT4G00340	0
chr2	10505157	10505776	621	10505505	176.04	31.2327	2.76624	28.2117	DEK2_peak_8156	AT2G24693	-282
chr4	2587224	2588861	1639	2588144	155.49	27.6097	2.76542	24.8472	DEK2_peak_16360	AT4G05049	0
chr5	25291315	25292141	828	25291779	236.8	40.9256	2.76517	37.229	DEK2_peak_25108	AT5G63050	-294
chr1	32979	33864	887	33495	183.19	32.3182	2.76455	29.2261	DEK2_peak_9	AT1G01050	0
chr5	8052234	8052699	467	8052509	156.38	27.735	2.76106	24.9649	DEK2_peak_22059	AT5G23880	0
chr5	25484253	25485398	1147	25485096	151.02	27.0084	2.76086	24.2843	DEK2_peak_25165	AT5G63660	-294
chr1	4541729	4542494	767	4542038	151.02	27.0084	2.76086	24.2843	DEK2_peak_1362	AT1G13260	0
chr1	20310482	20311035	555	20310790	151.02	27.0084	2.76086	24.2843	DEK2_peak_4136	AT1G54410	0
chr1	24732235	24732693	460	24732506	151.02	27.0084	2.76086	24.2843	DEK2_peak_5076	AT1G66330	0
chr1	26879856	26880267	413	26880043	151.02	27.0084	2.76086	24.2843	DEK2_peak_5766	AT1G71310	0
chr3	1678677	1680016	1341	1679322	151.02	27.0084	2.76086	24.2843	DEK2_peak_11385	AT3G05690	0
chr5	14752915	14753523	610	14753311	151.02	27.0084	2.76086	24.2843	DEK2_peak_22500	AT5G37260	0
chr5	17511925	17512828	905	17512295	151.02	27.0084	2.76086	24.2843	DEK2_peak_22989	AT5G43600	0
chr5	20215596	20216771	1177	20216135	151.02	27.0084	2.76086	24.2843	DEK2_peak_23663	AT5G49760	0
chr5	20441750	20442875	1127	20441946	151.02	27.0084	2.76086	24.2843	DEK2_peak_23695	AT5G50210	0
chr1	4311302	4311705	405	4311517	151.02	27.0084	2.76086	24.2843	DEK2_peak_1292	AT1G12663	333
chr1	23526653	23527566	915	23527001	177.83	31.0721	2.76065	28.0661	DEK2_peak_4784	AT1G63440	-89
chr5	3531084	3532321	1239	3531913	161.74	28.4447	2.76021	25.6255	DEK2_peak_20827	AT5G11100	-81
chr2	16749208	16750290	1084	16749881	192.12	33.714	2.75892	30.5237	DEK2_peak_9876	AT2G40113	0
chr4	10780234	10780871	639	10780450	169.78	29.7175	2.7581	26.8151	DEK2_peak_17373	AT4G19860	0
chr1	6148621	6149450	831	6148996	190.34	33.3051	2.75797	30.1439	DEK2_peak_1862	AT1G17850	0
chr1	27766155	27766890	737	27766432	167.1	29.541	2.7558	26.6484	DEK2_peak_6066	AT1G73840	0
chr3	4274240	4274758	520	4274538	167.1	29.541	2.7558	26.6484	DEK2_peak_12151	AT3G13235	0
chr5	5818172	5818921	751	5818682	178.72	31.143	2.75391	28.1328	DEK2_peak_21480	AT5G17650	0
chr5	19135299	19136286	989	19135521	178.72	31.143	2.75391	28.1328	DEK2_peak_23386	AT5G47110	0
chr3	1329332	1329910	580	1329627	160.85	28.1439	2.75388	25.3467	DEK2_peak_11271	AT3G04840	0
chr3	7331398	7331805	409	7331582	172.47	30.2193	2.75342	27.2813	DEK2_peak_13068	AT3G20930	0
chr2	17126531	17127106	577	17126908	176.93	30.7391	2.75311	27.7519	DEK2_peak_9979	AT2G41060	0
chr5	870794	871580	788	871148	177.83	30.9247	2.75262	27.9275	DEK2_peak_20030	AT5G03480	0
chr3	561648	562303	657	561872	243.95	41.7196	2.75228	37.9652	DEK2_peak_11045	AT3G02630	0
chr5	25647608	25648100	494	25647901	210.89	36.3114	2.75182	32.9395	DEK2_peak_25220	AT5G64090	0
chr1	8741576	8742090	516	8741832	202.85	35.0081	2.75172	31.7259	DEK2_peak_2563	AT1G24706	0
chr3	4235581	4236420	841	4236059	180.51	31.4613	2.75011	28.4278	DEK2_peak_12144	AT3G13175	0
chr5	26044846	26045574	730	26045217	176.04	30.9028	2.74821	27.9065	DEK2_peak_25370	AT5G65180	0
chr3	5836595	5837864	1271	5837292	185.87	32.1405	2.74808	29.0634	DEK2_peak_12671	AT3G17110	0
chr4	13997171	13997779	610	13997480	226.97	38.7937	2.74669	35.249	DEK2_peak_18254	AT4G28230	0
chr5	21860487	21861334	849	21860976	152.81	26.7221	2.74653	24.0237	DEK2_peak_24038	AT5G53840	0
chr5	22405067	22405647	582	22405335	172.47	30.0945	2.74644	27.164	DEK2_peak_24215	AT5G55240	-279
chr1	7835529	7837946	2419	7837075	191.23	33.2661	2.74615	30.1071	DEK2_peak_2336	AT1G22190	0
chr5	13748034	13748504	472	13748305	157.27	27.6684	2.74505	24.9021	DEK2_peak_22453	AT5G35560	0
chr2	8092226	8093484	1260	8092540	150.13	26.5579	2.74463	23.8681	DEK2_peak_7601	AT2G18670	0
chr5	19716840	19717448	610	19717115	150.13	26.5579	2.74463	23.8681	DEK2_peak_23541	AT5G48620	364
chr3	20260412	20262561	2151	20261289	159.95	27.7948	2.74456	25.0221	DEK2_peak_15002	AT3G54740	0
chr1	6898457	6900650	2195	6898687	179.61	31.1491	2.74377	28.1388	DEK2_peak_2072	AT1G19870	0
chr5	3480312	3480841	531	3480565	160.85	27.9658	2.74319	25.1781	DEK2_peak_20809	AT5G11000	0
chr1	8076307	8076981	676	8076648	201.95	34.6248	2.74262	31.3635	DEK2_peak_2417	AT1G22830	0
chr1	23921750	23923510	1762	23922521	163.53	28.5291	2.74215	25.705	DEK2_peak_4901	AT1G64405	-222
chr4	17504273	17504834	563	17504453	163.53	28.5291	2.74215	25.705	DEK2_peak_19358	AT4G37180	0
chr5	21692176	21693341	1167	21693071	163.53	28.5291	2.74215	25.705	DEK2_peak_23986	AT5G53451	0
chr1	5237451	5238223	774	5237912	181.4	31.4713	2.74032	28.437	DEK2_peak_1613	AT1G15215	0
chr3	6063376	6064015	641	6063771	168.89	29.2093	2.74017	26.3406	DEK2_peak_12735	AT3G17730	-364
chr3	21013124	21014132	1010	21013678	168.89	29.2093	2.74017	26.3406	DEK2_peak_15226	AT3G56730	0
chr1	20812773	20813196	425	20812923	151.91	26.423	2.73987	23.7464	DEK2_peak_4232	AT1G55690	0
chr5	26156968	26157696	730	26157319	235.91	40.1169	2.7398	36.4806	DEK2_peak_25412	AT5G65445	0
chr4	512568	513558	992	513014	178.72	30.866	2.73893	27.8722	DEK2_peak_16076	AT4G01210	0
chr1	26429211	26430130	921	26429737	174.25	30.3352	2.73832	27.3847	DEK2_peak_5598	AT1G70185	0
chr3	7811985	7813221	1238	7812846	174.25	30.3352	2.73832	27.3847	DEK2_peak_13187	AT3G22150	0
chr3	21233374	21234139	767	21233602	174.25	30.3352	2.73832	27.3847	DEK2_peak_15309	AT3G57390	0
chr1	521642	522155	515	521933	218.04	37.5526	2.73799	34.099	DEK2_peak_184	AT1G02510	0
chr5	2513041	2514047	1008	2513566	150.13	26.4329	2.73668	23.756	DEK2_peak_20521	AT5G07870	0
chr1	20803384	20803978	596	20803680	201.06	34.7252	2.73535	31.4592	DEK2_peak_4230	AT1G55670	0
chr1	6266628	6268370	1744	6267282	184.98	31.6958	2.73494	28.6436	DEK2_peak_1882	AT1G18200	0
chr1	26851675	26852209	536	26852011	158.17	27.6906	2.73465	24.9231	DEK2_peak_5762	AT1G71230	-252
chr3	4137381	4138546	1167	4137729	173.36	30.0683	2.73422	27.1389	DEK2_peak_12113	AT3G12965	0
chr1	25363225	25363747	524	25363558	187.66	32.2581	2.73415	29.1691	DEK2_peak_5237	AT1G67660	0
chr5	22050189	22051279	1092	22050878	157.27	27.4723	2.7331	24.7174	DEK2_peak_24101	AT5G54290	0
chr5	1936017	1936371	356	1936217	171.57	29.6486	2.73229	26.7501	DEK2_peak_20363	AT5G06340	0
chr3	4688000	4688609	611	4688256	164.42	28.5443	2.73173	25.7193	DEK2_peak_12281	AT3G14130	0
chr1	26342898	26343437	541	26343198	169.78	29.2452	2.73124	26.3752	DEK2_peak_5574	AT1G69935	0
chr5	3582019	3582698	681	3582409	198.38	34.0628	2.73123	30.8524	DEK2_peak_20842	AT5G11240	0
chr5	18790191	18791980	1791	18790395	155.49	27.052	2.73096	24.3256	DEK2_peak_23299	AT5G46325	0
chr2	15392785	15393199	416	15392976	157.27	27.4025	2.72886	24.6557	DEK2_peak_9422	AT2G36720	0
chr3	3419420	3421174	1756	3420088	178.72	30.672	2.72845	27.702	DEK2_peak_11891	AT3G10930	0
chr4	17467254	17468755	1503	17468469	149.23	26.1103	2.72841	23.451	DEK2_peak_19347	AT4G37070	-145
chr3	5935600	5936013	415	5935819	149.23	26.1103	2.72841	23.451	DEK2_peak_12698	AT3G17360	-95
chr1	16913368	16913937	571	16913718	149.23	26.1103	2.72841	23.451	DEK2_peak_3494	AT1G44790	0
chr1	19458791	19460140	1351	19459842	149.23	26.1103	2.72841	23.451	DEK2_peak_3913	AT1G52240	0
chr2	11750073	11753223	3152	11750327	149.23	26.1103	2.72841	23.451	DEK2_peak_8415	AT2G27490	0
chr3	666679	667431	754	666887	149.23	26.1103	2.72841	23.451	DEK2_peak_11083	AT3G02950	0
chr3	5348862	5349590	730	5349309	149.23	26.1103	2.72841	23.451	DEK2_peak_12519	AT3G15810	0
chr3	20785747	20786402	657	20786212	149.23	26.1103	2.72841	23.451	DEK2_peak_15156	AT3G56000	0
chr4	14198358	14199333	977	14198934	149.23	26.1103	2.72841	23.451	DEK2_peak_18319	AT4G28730	0
chr4	15974542	15975020	480	15974808	149.23	26.1103	2.72841	23.451	DEK2_peak_18862	AT4G33110	0
chr4	18254549	18255378	831	18255075	149.23	26.1103	2.72841	23.451	DEK2_peak_19623	AT4G39195	0
chr3	4419257	4419983	728	4419549	159.95	27.5209	2.72805	24.7625	DEK2_peak_12195	AT3G13530	0
chr3	9841987	9842703	718	9842265	159.95	27.5209	2.72805	24.7625	DEK2_peak_13695	AT3G26750	0
chr2	10757305	10758483	1180	10758061	149.23	26.1002	2.72776	23.4465	DEK2_peak_8198	AT2G25260	0
chr2	15320020	15321126	1108	15320611	162.64	28.0921	2.72776	25.2971	DEK2_peak_9398	AT2G36510	0
chr3	19056064	19056855	793	19056622	183.19	31.5989	2.72674	28.5582	DEK2_peak_14626	AT3G51330	0
chr1	6183738	6184777	1041	6184253	165.32	28.6465	2.7265	25.8163	DEK2_peak_1868	AT1G17960	0
chr5	1409771	1410161	392	1409995	165.32	28.6465	2.7265	25.8163	DEK2_peak_20197	AT5G04850	0
chr1	4887769	4888407	640	4888199	175.15	30.2934	2.72545	27.3452	DEK2_peak_1476	AT1G14315	0
chr3	4160933	4162602	1671	4162227	152.81	26.3818	2.72512	23.708	DEK2_peak_12124	AT3G13000	0
chr3	1121252	1121831	581	1121578	195.7	33.3551	2.72474	30.1909	DEK2_peak_11207	AT3G04250	-119
chr3	6704037	6704909	874	6704562	227.87	38.47	2.72462	34.9509	DEK2_peak_12913	AT3G19340	0
chr2	8932014	8932561	549	8932360	184.98	31.4943	2.7244	28.4594	DEK2_peak_7779	AT2G20723	-92
chr3	393508	394123	617	393880	154.59	26.7368	2.72335	24.0377	DEK2_peak_10991	AT3G02160	0
chr1	7231467	7232163	698	7231873	178.72	30.5715	2.72304	27.6066	DEK2_peak_2161	AT1G20800	0
chr2	7481375	7481916	543	7481632	178.72	30.5715	2.72304	27.6066	DEK2_peak_7450	AT2G17190	0
chr4	17668900	17672765	3867	17670362	178.72	30.5715	2.72304	27.6066	DEK2_peak_19435	AT4G37608	0
chr5	16902203	16902661	460	16902390	178.72	30.5715	2.72304	27.6066	DEK2_peak_22876	AT5G42270	0
chr3	5081320	5082078	760	5081784	184.08	31.7035	2.72219	28.6507	DEK2_peak_12420	AT3G15095	0
chr5	21110131	21110518	389	21110319	158.17	27.4631	2.72091	24.7085	DEK2_peak_23830	AT5G51960	0
chr5	26097174	26098030	858	26097398	189.44	32.3769	2.72062	29.2811	DEK2_peak_25388	AT5G65305	0
chr3	21393613	21394233	622	21393941	176.93	30.1406	2.7204	27.2068	DEK2_peak_15354	AT3G57750	0
chr2	7841886	7842218	334	7842030	197.49	33.62	2.71899	30.4351	DEK2_peak_7536	AT2G18040	0
chr4	9279652	9280113	463	9279913	150.13	26.1399	2.71808	23.4787	DEK2_peak_16982	AT4G16450	0
chr4	14316812	14317514	704	14317144	202.85	34.3017	2.71797	31.0712	DEK2_peak_18346	AT4G29050	0
chr3	22284971	22285500	531	22285183	176.93	30.0925	2.71778	27.1621	DEK2_peak_15595	AT3G60300	0
chr5	3142974	3143872	900	3143291	162.64	27.9148	2.7173	25.1337	DEK2_peak_20702	AT5G10040	0
chr4	14072338	14073350	1014	14072630	159.06	27.5678	2.71571	24.8069	DEK2_peak_18285	AT4G28470	0
chr1	10758748	10759247	501	10759075	161.74	27.6813	2.71476	24.914	DEK2_peak_3043	AT1G30440	-228
chr1	24438375	24438945	572	24438653	151.02	26.2762	2.71462	23.6076	DEK2_peak_5007	AT1G65710	0
chr2	18250606	18253416	2812	18250988	170.68	29.141	2.71453	26.2769	DEK2_peak_10356	AT2G44120	0
chr1	11611737	11612211	476	11611927	177.83	30.2138	2.71402	27.2763	DEK2_peak_3218	AT1G32230	0
chr5	19396994	19397578	586	19397278	159.06	27.5209	2.7129	24.7625	DEK2_peak_23459	AT5G47910	0
chr1	18578929	18579465	538	18579259	161.74	27.6408	2.71237	24.8766	DEK2_peak_3759	AT1G50140	-227
chr4	994355	995062	709	994559	194.81	32.914	2.71236	29.7812	DEK2_peak_16195	AT4G02280	0
chr4	15706893	15707772	881	15707184	149.23	25.8573	2.71225	23.2167	DEK2_peak_18788	AT4G32551	0
chr1	26447915	26448980	1067	26448223	148.34	25.6655	2.71218	23.0357	DEK2_peak_5609	AT1G70220	0
chr2	6921819	6922460	643	6922197	148.34	25.6655	2.71218	23.0357	DEK2_peak_7378	AT2G15890	0
chr5	5803631	5804034	405	5803868	164.42	28.203	2.71185	25.4031	DEK2_peak_21473	AT5G17610	0
chr3	411657	412180	525	411984	168	28.5213	2.71176	25.6977	DEK2_peak_11001	AT3G02210	-5
chr5	22666995	22667471	478	22667324	151.02	26.2285	2.71162	23.5624	DEK2_peak_24284	AT5G55970	0
chr4	14547753	14548346	595	14548068	167.1	28.7653	2.71135	25.928	DEK2_peak_18411	AT4G29710	-351
chr2	15511288	15511879	593	15511545	167.1	28.7653	2.71135	25.928	DEK2_peak_9457	AT2G36930	0
chr1	26637588	26638715	1129	26637825	199.27	33.8393	2.71116	30.6414	DEK2_peak_5676	AT1G70645	0
chr1	19368782	19369309	529	19368982	175.15	30.0095	2.70994	27.0834	DEK2_peak_3899	AT1G52080	0
chr3	4735889	4737435	1548	4736392	165.32	28.3586	2.70984	25.5489	DEK2_peak_12297	AT3G14225	0
chr1	1188161	1189366	1207	1188503	177.83	30.1302	2.7095	27.1977	DEK2_peak_389	AT1G04400	0
chr1	28622583	28623158	577	28622808	177.83	30.1302	2.7095	27.1977	DEK2_peak_6375	AT1G76280	0
chr3	20530468	20531609	1143	20531174	177.83	30.1302	2.7095	27.1977	DEK2_peak_15072	AT3G55380	0
chr1	1023711	1024833	1124	1024020	180.51	30.6918	2.70907	27.7205	DEK2_peak_336	AT1G03982	0
chr5	5907392	5907921	531	5907636	185.87	31.3745	2.70825	28.3455	DEK2_peak_21505	AT5G17870	0
chr4	17698937	17699943	1008	17699189	188.55	31.9357	2.70786	28.8707	DEK2_peak_19444	AT4G37670	-94
chr1	2406559	2407391	834	2406828	188.55	31.9357	2.70786	28.8707	DEK2_peak_738	AT1G07760	0
chr1	4877002	4877848	848	4877392	188.55	31.9357	2.70786	28.8707	DEK2_peak_1472	AT1G14270	0
chr3	23210305	23211218	915	23210644	188.55	31.9357	2.70786	28.8707	DEK2_peak_15880	AT3G62735	0
chr5	3127024	3127557	535	3127354	151.91	25.8915	2.70627	23.2489	DEK2_peak_20697	AT5G10000	315
chr3	21758574	21759088	516	21758876	201.95	33.8622	2.70605	30.6632	DEK2_peak_15452	AT3G58840	0
chr2	16771540	16775633	4095	16774324	212.68	35.6662	2.70478	32.3357	DEK2_peak_9884	AT2G40140	0
chr2	13381235	13382158	925	13381712	151.91	25.8596	2.70426	23.2189	DEK2_peak_8877	AT2G31380	0
chr4	16941754	16942677	925	16942126	179.61	30.3293	2.69984	27.3797	DEK2_peak_19162	AT4G35750	0
chr1	27814366	27814844	480	27814559	181.4	30.6994	2.69944	27.727	DEK2_peak_6079	AT1G73960	0
chr5	18692266	18693532	1268	18692780	151.91	25.7801	2.69925	23.144	DEK2_peak_23270	AT5G46090	0
chr3	21701168	21701630	464	21701382	163.53	27.7804	2.69826	25.0084	DEK2_peak_15434	AT3G58660	0
chr2	13676123	13676516	395	13676302	158.17	27.0787	2.69775	24.3505	DEK2_peak_8949	AT2G32200	0
chr4	14579418	14582156	2740	14580293	213.57	35.6973	2.69765	32.365	DEK2_peak_18423	AT4G29780	0
chr5	897222	898442	1222	898096	174.25	29.5945	2.6976	26.6988	DEK2_peak_20046	AT5G03552	0
chr1	25804130	25804594	466	25804390	160.85	27.2007	2.69747	24.4657	DEK2_peak_5381	AT1G68720	0
chr1	1141203	1142147	946	1141554	167.1	28.5213	2.69743	25.6977	DEK2_peak_370	AT1G04260	0
chr1	4285301	4286241	942	4285812	166.21	28.3239	2.69693	25.5164	DEK2_peak_1286	AT1G12590	0
chr1	9935389	9936808	1421	9936561	147.44	25.2236	2.69595	22.6224	DEK2_peak_2843	AT1G28330	-118
chr1	7873333	7874218	887	7873652	147.44	25.2236	2.69595	22.6224	DEK2_peak_2343	AT1G22280	0
chr3	8639407	8639729	324	8639582	147.44	25.2236	2.69595	22.6224	DEK2_peak_13415	AT3G23910	0
chr4	6026892	6027519	629	6027268	147.44	25.2236	2.69595	22.6224	DEK2_peak_16446	AT4G09520	0
chr4	6384181	6384747	568	6384379	147.44	25.2236	2.69595	22.6224	DEK2_peak_16478	AT4G10300	0
chr5	314852	315620	770	315241	147.44	25.2236	2.69595	22.6224	DEK2_peak_19838	AT5G01820	0
chr5	8692892	8693291	401	8693061	147.44	25.2236	2.69595	22.6224	DEK2_peak_22202	AT5G25170	0
chr5	9046096	9046784	690	9046590	147.44	25.2236	2.69595	22.6224	DEK2_peak_22274	AT5G25920	0
chr1	27376094	27377082	990	27376591	147.44	25.2236	2.69595	22.6224	DEK2_peak_5936	AT1G72720	313
chr4	10370036	10370821	787	10370503	179.61	30.2523	2.69573	27.3067	DEK2_peak_17280	AT4G18930	0
chr1	6313805	6314333	530	6314107	182.29	30.8133	2.69551	27.8224	DEK2_peak_1896	AT1G18340	0
chr3	2102059	2102586	529	2102287	184.98	30.9362	2.6953	27.9381	DEK2_peak_11524	AT3G06660	0
chr3	4048791	4049872	1083	4049206	184.98	30.9362	2.6953	27.9381	DEK2_peak_12076	AT3G12740	0
chr5	18067370	18068283	915	18067852	187.66	31.4968	2.69509	28.4615	DEK2_peak_23150	AT5G44780	0
chr3	5341998	5343064	1068	5342737	193.02	32.6185	2.69469	29.5091	DEK2_peak_12516	AT3G15790	0
chr3	5005474	5006381	909	5006157	154.59	26.2723	2.69463	23.6043	DEK2_peak_12396	AT3G14880	-184
chr5	15874753	15875142	391	15874959	195.7	32.7411	2.6945	29.619	DEK2_peak_22628	AT5G39650	-57
chr5	19623977	19625796	1821	19625465	198.38	33.3016	2.69432	30.1404	DEK2_peak_23510	AT5G48412	0
chr4	9475372	9476305	935	9476064	165.32	28.0872	2.69417	25.2926	DEK2_peak_17041	AT4G16845	0
chr5	1420138	1421057	921	1420571	174.25	29.531	2.69412	26.6399	DEK2_peak_20200	AT5G04870	0
chr1	29768248	29769012	766	29768727	209.1	35.1057	2.69363	31.8124	DEK2_peak_6789	AT1G79120	0
chr1	28073733	28074824	1093	28074078	182.29	30.7733	2.69341	27.7849	DEK2_peak_6164	AT1G74720	-250
chr5	26295812	26296349	539	26296159	195.7	32.7185	2.6934	29.5973	DEK2_peak_25467	AT5G65720	0
chr1	5843703	5844646	945	5844292	227.87	37.7154	2.69257	34.2473	DEK2_peak_1774	AT1G17090	0
chr5	6260858	6261493	637	6261190	235.91	38.9585	2.69217	35.4055	DEK2_peak_21602	AT5G18760	0
chr1	28169946	28170368	424	28170146	167.1	28.4257	2.69198	25.6072	DEK2_peak_6197	AT1G75010	0
chr5	5610530	5611004	476	5610692	148.34	25.3195	2.69	22.713	DEK2_peak_21427	AT5G17060	0
chr5	323049	324581	1534	324036	163.53	27.6376	2.68992	24.8738	DEK2_peak_19842	AT5G01840	0
chr3	18619686	18620276	592	18619889	159.95	26.8815	2.68966	24.1741	DEK2_peak_14487	AT3G50230	-323
chr1	2710831	2711415	586	2711162	168	28.1252	2.68911	25.329	DEK2_peak_822	AT1G08560	0
chr1	2055354	2056359	1007	2055999	175.15	29.6208	2.68876	26.7235	DEK2_peak_626	AT1G06700	0
chr3	22635182	22635972	792	22635597	195.7	32.6241	2.68876	29.5129	DEK2_peak_15692	AT3G61160	0
chr1	9996554	9997022	470	9996849	150.13	25.6742	2.68863	23.044	DEK2_peak_2867	AT1G28440	0
chr1	29813939	29816003	2066	29814356	161.74	27.2359	2.68839	24.4991	DEK2_peak_6804	AT1G79270	0
chr1	29630395	29630828	435	29630636	160.85	27.035	2.68762	24.3094	DEK2_peak_6744	AT1G78810	0
chr3	4481640	4482571	933	4481915	197.49	32.9621	2.68696	29.8259	DEK2_peak_12217	AT3G13682	-131
chr5	5990528	5991185	659	5990780	186.76	31.1499	2.68693	28.1395	DEK2_peak_21526	AT5G18110	0
chr3	349826	350809	985	350302	215.36	35.8303	2.68678	32.4904	DEK2_peak_10971	AT3G02040	0
chr3	5272700	5273350	652	5272996	173.36	29.1876	2.68558	26.3209	DEK2_peak_12490	AT3G15578	-341
chr2	19650082	19651663	1583	19651199	169.78	28.4321	2.68525	25.6134	DEK2_peak_10873	AT2G48030	0
chr3	4861133	4861510	379	4861326	182.29	30.5837	2.68348	27.6182	DEK2_peak_12354	AT3G14475	-124
chr1	23820737	23821556	821	23820989	184.08	30.9534	2.68324	27.9548	DEK2_peak_4869	AT1G64180	0
chr3	6528942	6529599	659	6529215	151.91	25.5166	2.68267	22.8992	DEK2_peak_12868	AT3G18940	0
chr2	15584968	15585500	534	15585244	156.38	26.4526	2.68265	23.774	DEK2_peak_9485	AT2G37080	0
chr1	11809559	11810692	1135	11810444	157.27	26.6392	2.68261	23.9455	DEK2_peak_3264	AT1G32650	0
chr1	23227128	23227684	558	23227374	159.95	26.7632	2.68258	24.0621	DEK2_peak_4712	AT1G62720	0
chr4	14354979	14356001	1024	14355218	159.95	26.7632	2.68258	24.0621	DEK2_peak_18358	AT4G29130	0
chr4	13680690	13681303	615	13681003	170.68	28.5698	2.68247	25.7435	DEK2_peak_18154	AT4G27320	0
chr5	5411065	5411774	711	5411544	173.36	29.1305	2.68244	26.2667	DEK2_peak_21379	AT5G16560	0
chr1	20870196	20871045	851	20870561	176.04	29.6914	2.68242	26.7897	DEK2_peak_4249	AT1G55830	0
chr1	23595736	23596261	527	23596027	178.72	29.8152	2.68239	26.9002	DEK2_peak_4796	AT1G63640	0
chr3	19083608	19084130	524	19083892	184.08	30.9362	2.68235	27.9381	DEK2_peak_14636	AT3G51420	0
chr1	2374475	2375191	718	2374750	208.21	34.6688	2.68217	31.4052	DEK2_peak_731	AT1G07670	0
chr3	4817779	4818662	885	4818194	218.93	36.0371	2.6821	32.685	DEK2_peak_12335	AT3G14410	0
chr5	1837221	1838161	942	1837542	167.1	28.2514	2.68206	25.4483	DEK2_peak_20323	AT5G06100	0
chr1	29647595	29648293	700	29647894	154.59	26.0666	2.68195	23.4147	DEK2_peak_6753	AT1G78860	-96
chr2	12665976	12666501	527	12666224	169.78	28.3535	2.68082	25.5444	DEK2_peak_8680	AT2G29620	-173
chr1	2847664	2848500	838	2848050	147.44	24.9758	2.67998	22.3932	DEK2_peak_856	AT1G08880	0
chr1	11043516	11044007	493	11043745	146.55	24.7845	2.67972	22.212	DEK2_peak_3102	AT1G30970	0
chr2	14957604	14958132	530	14957861	146.55	24.7845	2.67972	22.212	DEK2_peak_9273	AT2G35613	0
chr3	11190745	11191793	1050	11191373	146.55	24.7845	2.67972	22.212	DEK2_peak_13905	AT3G29240	0
chr3	16426827	16427281	456	16427072	146.55	24.7845	2.67972	22.212	DEK2_peak_14025	AT3G44955	0
chr5	16579633	16580318	687	16579875	146.55	24.7845	2.67972	22.212	DEK2_peak_22793	AT5G41410	0
chr3	17495057	17495579	524	17495231	186.76	30.9931	2.67888	27.9918	DEK2_peak_14207	AT3G47470	-24
chr4	826660	827317	659	827093	176.04	29.6162	2.67836	26.719	DEK2_peak_16157	AT4G01910	0
chr5	1216887	1217815	930	1217246	165.32	27.8025	2.67777	25.0288	DEK2_peak_20133	AT5G04340	0
chr1	29015441	29016173	734	29015841	169.78	28.2909	2.67729	25.4857	DEK2_peak_6524	AT1G77230	0
chr5	24741795	24742253	460	24742036	188.55	31.3311	2.67711	28.305	DEK2_peak_24923	AT5G61530	0
chr5	7400792	7401789	999	7401295	176.93	29.3339	2.67657	26.453	DEK2_peak_21896	AT5G22350	0
chr1	958017	958354	339	958184	178.72	29.7033	2.6764	26.8012	DEK2_peak_317	AT1G03800	-19
chr5	144641	145873	1234	145582	188.55	31.2842	2.67473	28.2598	DEK2_peak_19784	AT5G01340	0
chr4	13217212	13217937	727	13217514	151.91	25.3546	2.6725	22.7463	DEK2_peak_18018	AT4G26070	0
chr2	15285970	15286542	574	15286282	168.89	28.0124	2.67208	25.2222	DEK2_peak_9388	AT2G36420	0
chr4	18025090	18025820	732	18025458	234.12	38.524	2.67186	35.0023	DEK2_peak_19551	AT4G38545	0
chr2	15699430	15699893	465	15699676	156.38	26.2636	2.67118	23.5966	DEK2_peak_9525	AT2G37410	-155
chr4	10321426	10322139	715	10321768	204.63	33.6747	2.67058	30.487	DEK2_peak_17268	AT4G18800	0
chr3	654356	655133	779	654565	167.1	28.0466	2.67043	25.2554	DEK2_peak_11079	AT3G02930	0
chr5	25706234	25706809	577	25706493	199.27	32.9897	2.67031	29.8526	DEK2_peak_25245	AT5G64270	0
chr2	9830163	9830663	502	9830494	159.95	26.5524	2.66999	23.8681	DEK2_peak_8005	AT2G23090	0
chr3	3068633	3069257	626	3068948	191.23	31.7451	2.66987	28.6902	DEK2_peak_11805	AT3G09980	0
chr5	3030757	3031372	617	3031103	191.23	31.7451	2.66987	28.6902	DEK2_peak_20661	AT5G09755	0
chr4	13820778	13821238	462	13820969	188.55	31.1854	2.66972	28.1689	DEK2_peak_18195	AT4G27680	0
chr2	9802863	9803454	593	9803172	185.87	30.6259	2.66956	27.6581	DEK2_peak_7993	AT2G23020	0
chr2	16850367	16851196	831	16850665	185.87	30.6259	2.66956	27.6581	DEK2_peak_9913	AT2G40340	0
chr2	15071621	15073094	1475	15072200	157.27	26.4172	2.66922	23.7412	DEK2_peak_9311	AT2G35900	0
chr2	12849191	12849980	791	12849681	189.44	31.3596	2.66915	28.3321	DEK2_peak_8737	AT2G30105	0
chr5	25118448	25119263	817	25118851	176.04	29.4434	2.66903	26.558	DEK2_peak_25052	AT5G62576	0
chr1	1291746	1292688	944	1292093	175.15	29.2549	2.66888	26.3841	DEK2_peak_417	AT1G04640	0
chr5	9859522	9861422	1902	9859756	172.47	28.6947	2.66869	25.862	DEK2_peak_22379	AT5G27820	0
chr3	6398039	6398488	451	6398262	169.78	28.1347	2.66851	25.3376	DEK2_peak_12831	AT3G18580	0
chr2	12355657	12356641	986	12356198	164.42	27.4488	2.66811	24.7	DEK2_peak_8593	AT2G28790	-226
chr4	15136577	15136954	379	15136776	164.42	27.4488	2.66811	24.7	DEK2_peak_18616	AT4G31120	0
chr1	25049442	25050383	943	25050132	161.74	26.8885	2.6679	24.1805	DEK2_peak_5165	AT1G67090	-18
chr3	18141975	18142512	539	18142247	161.74	26.8885	2.6679	24.1805	DEK2_peak_14356	AT3G48930	0
chr5	4936218	4936710	494	4936458	161.74	26.8885	2.6679	24.1805	DEK2_peak_21231	AT5G15200	0
chr2	7325961	7326436	477	7326189	151.02	25.5166	2.667	22.8992	DEK2_peak_7436	AT2G16900	0
chr1	18728065	18728731	668	18728317	168.89	27.9189	2.66679	25.1347	DEK2_peak_3786	AT1G50570	0
chr1	4139838	4141060	1224	4140190	148.34	24.9406	2.6658	22.3595	DEK2_peak_1238	AT1G12210	0
chr3	10216554	10217015	463	10216860	160.85	26.6593	2.66531	23.965	DEK2_peak_13784	AT3G27570	0
chr1	3119529	3120055	528	3119794	210.89	34.3939	2.66394	31.1591	DEK2_peak_935	AT1G09630	0
chr5	14897016	14897426	412	14897258	151.02	25.4643	2.66372	22.8497	DEK2_peak_22512	AT5G37510	0
chr1	5003466	5004187	723	5003827	145.66	24.3484	2.66349	21.8054	DEK2_peak_1523	AT1G14600	-96
chr2	13328606	13328994	390	13328799	145.66	24.3484	2.66349	21.8054	DEK2_peak_8862	AT2G31270	-15
chr1	5135430	5137082	1654	5135634	145.66	24.3484	2.66349	21.8054	DEK2_peak_1578	AT1G14890	0
chr1	21539521	21540197	678	21539970	145.66	24.3484	2.66349	21.8054	DEK2_peak_4375	AT1G58180	0
chr1	29204570	29205166	598	29204947	145.66	24.3484	2.66349	21.8054	DEK2_peak_6575	AT1G77700	0
chr3	1756246	1757704	1460	1756737	145.66	24.3484	2.66349	21.8054	DEK2_peak_11409	AT3G05880	0
chr3	17475091	17475541	452	17475347	145.66	24.3484	2.66349	21.8054	DEK2_peak_14201	AT3G47420	0
chr3	19466993	19467703	712	19467255	145.66	24.3484	2.66349	21.8054	DEK2_peak_14759	AT3G52500	0
chr1	24361819	24362450	633	24362112	177.83	29.2696	2.66309	26.3983	DEK2_peak_4991	AT1G65520	0
chr2	18401527	18402262	737	18401870	154.59	25.7375	2.66171	23.1038	DEK2_peak_10409	AT2G44578	-201
chr3	2308931	2309700	771	2309493	227.87	36.9749	2.66126	33.5611	DEK2_peak_11585	AT3G07260	-4
chr3	478569	479286	719	478845	227.87	36.9749	2.66126	33.5611	DEK2_peak_11016	AT3G02350	0
chr5	17856656	17857223	569	17856909	256.46	41.5662	2.66085	37.8209	DEK2_peak_23089	AT5G44320	0
chr4	15720885	15721476	593	15721266	181.4	29.9611	2.66058	27.0382	DEK2_peak_18792	AT4G32590	0
chr1	5517748	5518569	823	5518230	189.44	31.1886	2.66053	28.1696	DEK2_peak_1701	AT1G16100	0
chr5	3757998	3759073	1077	3758788	217.15	35.604	2.66031	32.2761	DEK2_peak_20889	AT5G11680	0
chr1	2804950	2805402	454	2805162	159.06	26.6304	2.6598	23.9374	DEK2_peak_844	AT1G08760	0
chr1	26731352	26732022	672	26731652	201.06	33.1156	2.65869	29.9648	DEK2_peak_5718	AT1G70900	0
chr4	9257474	9258009	537	9257816	201.06	33.1156	2.65869	29.9648	DEK2_peak_16974	AT4G16390	0
chr1	262186	262965	781	262674	188.55	30.9268	2.65662	27.9295	DEK2_peak_93	AT1G01710	0
chr1	22459816	22462021	2207	22461379	179.61	29.5073	2.65609	26.617	DEK2_peak_4533	AT1G60987	0
chr4	10500022	10501397	1377	10501159	179.61	29.5073	2.65609	26.617	DEK2_peak_17316	AT4G19210	0
chr4	10698461	10699386	927	10698772	151.91	25.0902	2.65593	22.5011	DEK2_peak_17356	AT4G19660	-218
chr4	14003510	14004661	1153	14004275	171.57	28.2614	2.65495	25.4573	DEK2_peak_18258	AT4G28260	0
chr4	14033916	14034846	932	14034167	159.95	26.2887	2.65427	23.6191	DEK2_peak_18274	AT4G28370	0
chr1	19761234	19761827	595	19761498	166.21	27.5748	2.65413	24.8135	DEK2_peak_3980	AT1G53030	0
chr1	6324211	6325182	973	6324836	182.29	30.0215	2.6541	27.0946	DEK2_peak_1898	AT1G18370	0
chr3	18770701	18771090	391	18770959	151.02	25.3078	2.65396	22.702	DEK2_peak_14525	AT3G50590	0
chr2	11118020	11119028	1010	11118260	146.55	24.3836	2.65379	21.8382	DEK2_peak_8272	AT2G26100	0
chr3	21487164	21487590	428	21487377	163.53	27.0151	2.6537	24.2903	DEK2_peak_15387	AT3G58035	0
chr5	18954362	18954996	636	18954647	163.53	27.0151	2.6537	24.2903	DEK2_peak_23335	AT5G46710	0
chr5	17245781	17246763	984	17246260	193.91	31.5398	2.65366	28.5019	DEK2_peak_22941	AT5G42990	0
chr1	98961	99622	663	99287	165.32	27.3806	2.65355	24.6359	DEK2_peak_37	AT1G01240	-272
chr4	7042284	7042793	511	7042479	160.85	26.4556	2.65325	23.7766	DEK2_peak_16568	AT4G11660	0
chr5	5759379	5760600	1223	5760276	160.85	26.4556	2.65325	23.7766	DEK2_peak_21464	AT5G17460	0
chr1	20731038	20731680	644	20731335	184.98	30.1125	2.65259	27.1811	DEK2_peak_4214	AT1G55530	0
chr3	23167094	23168510	1418	23167749	155.49	25.7684	2.65232	23.1327	DEK2_peak_15866	AT3G62650	0
chr1	26767985	26769101	1118	26768800	152.81	25.2085	2.65183	22.6134	DEK2_peak_5730	AT1G70990	0
chr4	16271738	16272089	353	16271954	152.81	25.2085	2.65183	22.6134	DEK2_peak_18934	AT4G33950	0
chr3	5418401	5419252	853	5419048	150.13	25.0814	2.65132	22.4928	DEK2_peak_12533	AT3G15980	0
chr5	653595	654130	537	653856	190.34	31.1873	2.65124	28.1689	DEK2_peak_19956	AT5G02860	0
chr5	23391623	23392671	1050	23391962	213.57	34.6149	2.64902	31.3545	DEK2_peak_24509	AT5G57720	-3
chr5	19224430	19225801	1373	19225242	175.15	28.8697	2.64802	26.0216	DEK2_peak_23409	AT5G47380	0
chr5	22079975	22080668	695	22080258	202.85	32.8125	2.64737	29.6861	DEK2_peak_24109	AT5G54380	-95
chr1	1312668	1313763	1097	1313008	202.85	32.8125	2.64737	29.6861	DEK2_peak_429	AT1G04690	0
chr1	18739169	18739849	682	18739578	144.76	23.9153	2.64726	21.4009	DEK2_peak_3790	AT1G50600	0
chr1	22423588	22424174	588	22423995	144.76	23.9153	2.64726	21.4009	DEK2_peak_4526	AT1G60900	0
chr2	13771139	13771567	430	13771331	144.76	23.9153	2.64726	21.4009	DEK2_peak_8970	AT2G32430	0
chr3	6465690	6466394	706	6466129	144.76	23.9153	2.64726	21.4009	DEK2_peak_12846	AT3G18773	0
chr3	16732335	16733376	1043	16732580	144.76	23.9153	2.64726	21.4009	DEK2_peak_14060	AT3G45590	0
chr3	16895795	16896388	595	16896030	144.76	23.9153	2.64726	21.4009	DEK2_peak_14092	AT3G45970	0
chr3	19356759	19357457	700	19357103	144.76	23.9153	2.64726	21.4009	DEK2_peak_14718	AT3G52190	0
chr3	20488852	20489444	594	20489092	144.76	23.9153	2.64726	21.4009	DEK2_peak_15061	AT3G55260	0
chr5	4868922	4869365	445	4869150	144.76	23.9153	2.64726	21.4009	DEK2_peak_21211	AT5G15030	0
chr5	7237531	7238295	766	7237693	144.76	23.9153	2.64726	21.4009	DEK2_peak_21844	AT5G21900	0
chr5	20200134	20201319	1187	20200543	144.76	23.9153	2.64726	21.4009	DEK2_peak_23659	AT5G49720	0
chr5	24291590	24292691	1103	24292014	144.76	23.9153	2.64726	21.4009	DEK2_peak_24787	AT5G60400	0
chr1	1958206	1959145	941	1958810	197.49	32.1257	2.64648	29.0501	DEK2_peak_600	AT1G06420	0
chr1	5189351	5190251	902	5189681	197.49	32.1257	2.64648	29.0501	DEK2_peak_1597	AT1G15090	0
chr5	3547981	3548479	500	3548222	168.89	27.5483	2.64586	24.7883	DEK2_peak_20831	AT5G11150	0
chr3	3289184	3290008	826	3289496	189.44	30.8806	2.64505	27.886	DEK2_peak_11856	AT3G10540	0
chr2	7836752	7837183	433	7836997	187.66	30.4962	2.6441	27.5358	DEK2_peak_7534	AT2G18020	0
chr1	25385847	25386585	740	25386106	184.08	30.1939	2.64403	27.2571	DEK2_peak_5241	AT1G67720	0
chr5	23595365	23597491	2128	23596012	148.34	24.5981	2.64399	22.0417	DEK2_peak_24565	AT5G58375	0
chr5	19381006	19381607	603	19381431	203.74	32.9207	2.64387	29.7876	DEK2_peak_23454	AT5G47850	0
chr1	25455510	25456454	946	25455796	181.4	29.6352	2.6435	26.7372	DEK2_peak_5260	AT1G67880	0
chr2	10942074	10942664	592	10942408	181.4	29.6352	2.6435	26.7372	DEK2_peak_8238	AT2G25690	0
chr5	19328724	19329981	1259	19329053	181.4	29.6352	2.6435	26.7372	DEK2_peak_23440	AT5G47700	0
chr1	3140593	3140967	376	3140811	178.72	29.0767	2.64295	26.2163	DEK2_peak_945	AT1G09710	0
chr5	4448561	4449263	704	4448740	174.25	28.5927	2.64293	25.7657	DEK2_peak_21083	AT5G13780	0
chr5	23343072	23344725	1655	23344229	170.68	27.8306	2.6412	25.0554	DEK2_peak_24487	AT5G57630	0
chr5	8037523	8038467	946	8037834	191.23	31.1408	2.63981	28.1307	DEK2_peak_22050	AT5G23850	0
chr5	18551244	18551935	693	18551734	175.15	28.7155	2.63968	25.882	DEK2_peak_23240	AT5G45730	-12
chr2	14121681	14122848	1169	14122008	162.64	26.5841	2.63928	23.8929	DEK2_peak_9049	AT2G33320	0
chr5	17721327	17722396	1071	17721673	182.29	29.7288	2.63885	26.8255	DEK2_peak_23046	AT5G44040	0
chr1	6008272	6008748	478	6008462	212.68	34.1864	2.63799	30.9622	DEK2_peak_1829	AT1G17490	0
chr3	7208349	7208930	583	7208542	212.68	34.1864	2.63799	30.9622	DEK2_peak_13036	AT3G20630	0
chr1	981769	982688	921	982013	204.63	32.9418	2.63634	29.8067	DEK2_peak_324	AT1G03860	0
chr4	6863753	6866622	2871	6866284	199.27	32.2547	2.63517	29.1661	DEK2_peak_16541	AT4G11280	0
chr1	10547944	10548419	477	10548192	146.55	24.0895	2.63483	21.565	DEK2_peak_2993	AT1G30070	0
chr1	28419434	28420248	816	28419977	196.59	31.697	2.63457	28.6444	DEK2_peak_6295	AT1G75680	0
chr3	21827298	21828356	1060	21827780	196.59	31.697	2.63457	28.6444	DEK2_peak_15468	AT3G59050	0
chr3	7590782	7591264	484	7591080	156.38	25.643	2.63363	23.0188	DEK2_peak_13133	AT3G21540	0
chr5	24732016	24732731	717	24732449	238.59	38.0482	2.63288	34.5593	DEK2_peak_24919	AT5G61490	0
chr1	4588647	4589408	763	4588910	160.85	26.1049	2.63254	23.4509	DEK2_peak_1383	AT1G13370	-34
chr2	12548331	12548974	645	12548534	176.04	28.7616	2.63236	25.9252	DEK2_peak_8652	AT2G29190	0
chr5	2732715	2733288	575	2733002	191.23	30.9878	2.63222	27.9867	DEK2_peak_20583	AT5G08450	0
chr4	12615990	12617498	1510	12617123	152.81	24.8904	2.63209	22.3125	DEK2_peak_17844	AT4G24390	0
chr1	25047219	25047768	551	25047469	143.87	23.4851	2.63103	20.9994	DEK2_peak_5163	AT1G67080	-359
chr1	3419413	3420752	1341	3419598	143.87	23.4851	2.63103	20.9994	DEK2_peak_1023	AT1G10410	0
chr1	8586091	8586507	418	8586363	143.87	23.4851	2.63103	20.9994	DEK2_peak_2535	AT1G24240	0
chr1	19684850	19685398	550	19685120	143.87	23.4851	2.63103	20.9994	DEK2_peak_3967	AT1G52860	0
chr2	16792304	16792805	503	16792602	143.87	23.4851	2.63103	20.9994	DEK2_peak_9891	AT2G40205	0
chr2	19414733	19415208	477	19415008	143.87	23.4851	2.63103	20.9994	DEK2_peak_10799	AT2G47275	0
chr3	6708982	6710926	1946	6709887	143.87	23.4851	2.63103	20.9994	DEK2_peak_12915	AT3G19370	0
chr3	8254221	8254880	661	8254645	143.87	23.4851	2.63103	20.9994	DEK2_peak_13312	AT3G23150	0
chr4	9896527	9897032	507	9896801	143.87	23.4851	2.63103	20.9994	DEK2_peak_17143	AT4G17800	0
chr5	24513812	24514523	713	24514281	143.87	23.4851	2.63103	20.9994	DEK2_peak_24857	AT5G60920	0
chr5	4581443	4582715	1274	4582334	166.21	27.1644	2.63078	24.4314	DEK2_peak_21123	AT5G14210	-69
chr4	16471396	16471983	589	16471819	170.68	27.6414	2.63068	24.8771	DEK2_peak_19003	AT4G34450	0
chr1	29427519	29428470	953	29427834	180.51	29.2062	2.63054	26.3383	DEK2_peak_6671	AT1G78220	-338
chr1	26653632	26655166	1536	26654231	154.59	25.2131	2.62959	22.6177	DEK2_peak_5682	AT1G70700	0
chr4	14012635	14013811	1178	14013103	175.15	28.5184	2.62904	25.695	DEK2_peak_18263	AT4G28290	-52
chr2	13835443	13836013	572	13835686	175.15	28.5184	2.62904	25.695	DEK2_peak_8984	AT2G32600	0
chr5	7512816	7513153	339	7512986	169.78	27.4023	2.62745	24.6557	DEK2_peak_21912	AT5G22608	-20
chr5	14235115	14235842	729	14235585	169.78	27.4023	2.62745	24.6557	DEK2_peak_22480	AT5G36160	0
chr5	23619210	23619699	491	23619423	175.15	28.4856	2.62728	25.6644	DEK2_peak_24570	AT5G58420	0
chr1	3130804	3131695	893	3131183	256.46	40.6654	2.62718	36.9896	DEK2_peak_940	AT1G09660	0
chr1	2878139	2879767	1630	2879412	159.95	25.8295	2.62697	23.191	DEK2_peak_872	AT1G08950	0
chr5	25254059	25254973	916	25254713	167.1	27.2721	2.62662	24.5328	DEK2_peak_25094	AT5G62920	0
chr2	12826363	12827061	700	12826794	174.25	28.2863	2.62629	25.4813	DEK2_peak_8728	AT2G30060	0
chr3	6961385	6961967	584	6961695	206.42	33.0722	2.6256	29.9302	DEK2_peak_12981	AT3G19980	0
chr1	27371526	27372339	815	27372116	166.21	27.0726	2.62558	24.3449	DEK2_peak_5934	AT1G72710	0
chr4	9697537	9698352	817	9698112	171.57	27.719	2.62494	24.9497	DEK2_peak_17083	AT4G17330	0
chr4	15544238	15544974	738	15544615	203.74	32.5153	2.62489	29.4114	DEK2_peak_18742	AT4G32190	0
chr4	9569825	9570310	487	9569984	161.74	26.1557	2.62487	23.4931	DEK2_peak_17054	AT4G17000	0
chr1	30165633	30166049	418	30165840	143.87	23.3842	2.62441	20.9081	DEK2_peak_6899	AT1G80210	0
chr5	288971	290148	1179	289202	159.06	26.0254	2.62395	23.3752	DEK2_peak_19830	AT5G01750	0
chr5	1948318	1948804	488	1948509	159.06	26.0254	2.62395	23.3752	DEK2_peak_20367	AT5G06370	0
chr1	9887456	9888324	870	9887647	198.38	31.8274	2.62342	28.7677	DEK2_peak_2835	AT1G28280	0
chr3	22268367	22268932	567	22268558	176.93	28.3354	2.62272	25.5274	DEK2_peak_15589	AT3G60245	0
chr1	1482166	1482800	636	1482431	195.7	31.2705	2.62265	28.2466	DEK2_peak_474	AT1G05140	0
chr5	21841466	21842023	559	21841799	195.7	31.2705	2.62265	28.2466	DEK2_peak_24033	AT5G53780	0
chr4	11180633	11181011	380	11180792	153.7	24.9085	2.62203	22.3287	DEK2_peak_17448	AT4G20880	0
chr4	12006017	12006688	673	12006351	153.7	24.9085	2.62203	22.3287	DEK2_peak_17654	AT4G22880	0
chr1	26983235	26983794	561	26983604	229.66	36.3794	2.62109	33.0035	DEK2_peak_5795	AT1G71720	0
chr1	19155914	19156505	593	19156161	194.81	31.0537	2.62087	28.0487	DEK2_peak_3867	AT1G51670	0
chr4	7656502	7656895	395	7656678	154.59	25.0608	2.6203	22.4734	DEK2_peak_16683	AT4G13170	0
chr4	12760633	12761298	667	12760998	190.34	30.5607	2.61998	27.5966	DEK2_peak_17876	AT4G24750	0
chr4	9853957	9854314	359	9854142	148.34	24.2193	2.61996	21.6872	DEK2_peak_17134	AT4G17700	-8
chr1	2671594	2672512	920	2671844	148.34	24.2193	2.61996	21.6872	DEK2_peak_808	AT1G08450	0
chr5	20110414	20111019	607	20110770	204.63	32.5883	2.61989	29.4808	DEK2_peak_23642	AT5G49555	0
chr3	344226	344975	751	344602	224.29	35.6917	2.6197	32.3597	DEK2_peak_10970	AT3G02030	0
chr5	8265849	8266650	803	8266277	161.74	26.0611	2.61934	23.4094	DEK2_peak_22113	AT5G24290	-108
chr3	2611244	2612510	1268	2612176	221.61	35.1356	2.61898	31.8399	DEK2_peak_11676	AT3G08590	0
chr5	7166953	7168172	1221	7167289	145.66	23.6608	2.61888	21.1652	DEK2_peak_21826	AT5G21100	-12
chr2	1032528	1032926	400	1032691	182.29	29.3368	2.6185	26.4555	DEK2_peak_7188	AT2G03390	0
chr3	4394000	4394384	386	4394183	157.27	25.5676	2.61822	22.9482	DEK2_peak_12183	AT3G13480	-39
chr2	243085	243764	681	243574	167.1	27.1196	2.61803	24.3887	DEK2_peak_7031	AT2G01540	0
chr2	281201	282171	972	281395	167.1	27.1196	2.61803	24.3887	DEK2_peak_7044	AT2G01630	0
chr4	5740002	5742198	2198	5741199	179.61	28.7796	2.61759	25.9412	DEK2_peak_16421	AT4G08950	0
chr2	15778632	15779200	570	15778985	157.27	25.5524	2.61731	22.9335	DEK2_peak_9550	AT2G37620	0
chr5	1286220	1286989	771	1286497	183.19	29.486	2.61691	26.597	DEK2_peak_20151	AT5G04510	0
chr5	1502775	1503387	614	1503143	176.93	28.2227	2.61666	25.4207	DEK2_peak_20215	AT5G05090	0
chr3	21719737	21720313	578	21720087	159.95	25.6479	2.61621	23.0236	DEK2_peak_15442	AT3G58730	0
chr5	25755027	25756345	1320	25755889	172.47	27.7362	2.61597	24.966	DEK2_peak_25266	AT5G64410	0
chr1	537478	537912	436	537733	208.21	33.2034	2.61512	30.0477	DEK2_peak_186	AT1G02560	0
chr2	18227726	18228748	1024	18228343	208.21	33.2034	2.61512	30.0477	DEK2_peak_10347	AT2G44065	0
chr2	14308536	14309831	1297	14308770	142.98	23.0578	2.6148	20.6001	DEK2_peak_9107	AT2G33820	-243
chr4	6434957	6435404	449	6435278	142.98	23.0578	2.6148	20.6001	DEK2_peak_16486	AT4G10380	-135
chr1	634661	635422	763	635081	142.98	23.0578	2.6148	20.6001	DEK2_peak_222	AT1G02860	0
chr1	7391549	7392047	500	7391759	142.98	23.0578	2.6148	20.6001	DEK2_peak_2209	AT1G21110	0
chr1	11222688	11223078	392	11222876	142.98	23.0578	2.6148	20.6001	DEK2_peak_3130	AT1G31350	0
chr2	12084911	12085602	693	12085428	142.98	23.0578	2.6148	20.6001	DEK2_peak_8509	AT2G28310	0
chr2	18625377	18626367	992	18626139	142.98	23.0578	2.6148	20.6001	DEK2_peak_10499	AT2G45180	0
chr3	8123346	8124197	853	8123587	142.98	23.0578	2.6148	20.6001	DEK2_peak_13269	AT3G22920	0
chr3	10314810	10315460	652	10315002	142.98	23.0578	2.6148	20.6001	DEK2_peak_13799	AT3G27820	0
chr5	1916463	1917474	1013	1916810	142.98	23.0578	2.6148	20.6001	DEK2_peak_20352	AT5G06278	0
chr5	8011245	8012182	939	8011923	142.98	23.0578	2.6148	20.6001	DEK2_peak_22045	AT5G23750	0
chr5	5212735	5213295	562	5213058	171.57	27.5336	2.61472	24.7742	DEK2_peak_21317	AT5G15980	0
chr4	9668257	9668695	440	9668414	168.89	26.9765	2.6137	24.2638	DEK2_peak_17076	AT4G17240	0
chr5	15225026	15225595	571	15225359	168.89	26.9765	2.6137	24.2638	DEK2_peak_22550	AT5G38150	0
chr1	24653735	24655203	1470	24654037	163.53	26.3231	2.61365	23.6521	DEK2_peak_5061	AT1G66190	0
chr3	21972256	21972813	559	21972564	202.85	32.0909	2.61343	29.0168	DEK2_peak_15502	AT3G59450	-27
chr2	13681840	13682922	1084	13682356	202.85	32.0909	2.61343	29.0168	DEK2_peak_8951	AT2G32230	0
chr1	11373383	11374046	665	11373627	236.8	37.1996	2.61324	33.7684	DEK2_peak_3155	AT1G31760	0
chr2	12978684	12979192	510	12978887	149.23	24.292	2.61318	21.7569	DEK2_peak_8776	AT2G30460	0
chr4	10955039	10955660	623	10955397	200.17	31.9587	2.61256	28.8924	DEK2_peak_17410	AT4G20290	0
chr3	21225307	21225815	510	21225513	234.12	37.0672	2.61249	33.6479	DEK2_peak_15305	AT3G57360	0
chr4	5992724	5993230	508	5992849	151.91	24.3877	2.6121	21.8422	DEK2_peak_16441	AT4G09460	0
chr5	16816610	16818210	1602	16817400	175.15	28.197	2.61174	25.3975	DEK2_peak_22854	AT5G42053	0
chr1	6759664	6760038	376	6759865	163.53	26.2871	2.61157	23.6179	DEK2_peak_2033	AT1G19520	0
chr3	17951285	17951749	466	17951534	161.74	25.9252	2.61139	23.2808	DEK2_peak_14317	AT3G48470	0
chr3	4169294	4169848	556	4169526	185.87	29.4917	2.61136	26.6024	DEK2_peak_12125	AT3G13020	-377
chr3	4127403	4128589	1188	4128175	202.85	32.041	2.61109	28.97	DEK2_peak_12109	AT3G12930	0
chr3	3589303	3591677	2376	3590571	194.81	30.8461	2.61074	27.8534	DEK2_peak_11946	AT3G11420	0
chr3	6501194	6501738	546	6501507	226.08	35.8235	2.61013	32.4838	DEK2_peak_12861	AT3G18850	0
chr3	21396895	21397671	778	21397343	184.08	29.5187	2.60936	26.628	DEK2_peak_15356	AT3G57770	0
chr1	9191022	9191628	608	9191375	159.95	25.5275	2.60909	22.9097	DEK2_peak_2665	AT1G26600	0
chr1	3324266	3326152	1888	3324549	164.42	26.4164	2.6087	23.7405	DEK2_peak_998	AT1G10150	0
chr2	17985017	17985475	460	17985192	152.81	24.5114	2.60865	21.9592	DEK2_peak_10253	AT2G43260	0
chr3	1478591	1479696	1107	1479373	169.78	27.0643	2.60859	24.3375	DEK2_peak_11331	AT3G05210	0
chr4	18096256	18096710	456	18096396	179.61	28.6004	2.60814	25.7731	DEK2_peak_19576	AT4G38760	-90
chr1	6727652	6728700	1050	6728049	186.76	29.601	2.60782	26.7048	DEK2_peak_2025	AT1G19430	0
chr2	18978972	18979647	677	18979369	209.1	33.2049	2.60706	30.0492	DEK2_peak_10621	AT2G46220	0
chr5	19547890	19548281	393	19548097	152.81	24.4828	2.60688	21.9322	DEK2_peak_23489	AT5G48205	-103
chr5	20674977	20675617	642	20675303	152.81	24.4828	2.60688	21.9322	DEK2_peak_23725	AT5G50805	0
chr5	21361936	21362766	832	21362305	184.08	29.4684	2.60679	26.5797	DEK2_peak_23896	AT5G52660	0
chr5	8880686	8881474	790	8880920	215.36	34.0238	2.60672	30.8158	DEK2_peak_22241	AT5G25500	0
chr5	20741305	20741902	599	20741618	212.68	33.4683	2.60582	30.2984	DEK2_peak_23744	AT5G50995	0
chr5	25116849	25117668	821	25117465	181.4	28.9118	2.60573	26.0612	DEK2_peak_25051	AT5G62575	0
chr1	5941059	5941978	921	5941671	150.13	24.3504	2.60561	21.8071	DEK2_peak_1805	AT1G17350	0
chr3	4314270	4314930	662	4314498	150.13	24.3504	2.60561	21.8071	DEK2_peak_12159	AT3G13320	0
chr4	7138473	7138875	404	7138659	150.13	24.3504	2.60561	21.8071	DEK2_peak_16583	AT4G11860	0
chr3	18451443	18452493	1052	18452134	149.23	24.1707	2.60556	21.6423	DEK2_peak_14438	AT3G49750	0
chr5	24543099	24543661	564	24543334	178.72	28.3554	2.60464	25.5459	DEK2_peak_24867	AT5G60980	0
chr1	12355015	12355935	922	12355689	169.78	26.9894	2.60441	24.2758	DEK2_peak_3349	AT1G33990	0
chr5	23609177	23609678	503	23609443	147.44	23.7926	2.60429	21.2896	DEK2_peak_24567	AT5G58410	0
chr1	3557870	3558431	563	3558220	204.63	32.224	2.60297	29.137	DEK2_peak_1071	AT1G10710	0
chr2	18604719	18606109	1392	18605648	204.63	32.224	2.60297	29.137	DEK2_peak_10488	AT2G45126	0
chr5	18712300	18712832	534	18712669	144.76	23.235	2.60292	20.7672	DEK2_peak_23278	AT5G46160	0
chr1	9613942	9614698	758	9614467	161.74	25.775	2.60262	23.1392	DEK2_peak_2778	AT1G27650	0
chr2	18010398	18011001	605	18010617	173.36	27.666	2.60237	24.8999	DEK2_peak_10267	AT2G43350	0
chr5	7249930	7250825	897	7250460	150.13	24.2943	2.60211	21.759	DEK2_peak_21847	AT5G21940	0
chr2	19586757	19587347	592	19586983	164.42	26.296	2.6018	23.6258	DEK2_peak_10854	AT2G47820	0
chr4	8195436	8196013	579	8195740	203.74	32.0152	2.60154	28.9461	DEK2_peak_16764	AT4G14220	0
chr2	8514009	8515281	1274	8514994	170.68	27.1095	2.60118	24.3791	DEK2_peak_7690	AT2G19750	0
chr2	19469444	19469943	501	19469724	170.68	27.1095	2.60118	24.3791	DEK2_peak_10814	AT2G47440	0
chr3	17522786	17523586	802	17523250	170.68	27.1095	2.60118	24.3791	DEK2_peak_14220	AT3G47543	0
chr3	20593194	20593915	723	20593606	170.68	27.1095	2.60118	24.3791	DEK2_peak_15097	AT3G55520	0
chr1	29787954	29788613	661	29788458	167.1	26.8172	2.60101	24.1142	DEK2_peak_6798	AT1G79190	-26
chr3	19396282	19396736	456	19396552	167.1	26.8172	2.60101	24.1142	DEK2_peak_14729	AT3G52300	0
chr5	5493005	5493837	834	5493346	166.21	26.6334	2.60071	23.9403	DEK2_peak_21401	AT5G16720	-391
chr4	18304415	18304994	581	18304645	165.32	26.4497	2.6004	23.7712	DEK2_peak_19641	AT4G39361	0
chr2	15816896	15817776	882	15817120	150.13	24.2641	2.60023	21.7302	DEK2_peak_9562	AT2G37710	0
chr5	18281670	18282039	371	18281835	144.76	23.1907	2.60004	20.726	DEK2_peak_23186	AT5G45190	0
chr5	3566902	3567330	430	3567095	168	26.5533	2.59996	23.8681	DEK2_peak_20836	AT5G11200	0
chr3	645223	645999	778	645629	161.74	25.7151	2.59913	23.0827	DEK2_peak_11075	AT3G02900	0
chr5	25568123	25568662	541	25568386	194.81	30.6044	2.59895	27.6376	DEK2_peak_25197	AT5G63890	0
chr1	1576424	1576950	528	1576744	193.91	30.424	2.59882	27.4682	DEK2_peak_501	AT1G05380	0
chr2	18037921	18038454	535	18038210	151.02	24.4179	2.5987	21.8711	DEK2_peak_10278	AT2G43430	0
chr1	10307958	10308783	827	10308395	165.32	26.4197	2.59869	23.7432	DEK2_peak_2945	AT1G29460	0
chr1	6483561	6484404	845	6484070	142.08	23.0578	2.59857	20.6001	DEK2_peak_1946	AT1G18800	0
chr1	10294292	10295029	739	10294588	142.08	23.0578	2.59857	20.6001	DEK2_peak_2936	AT1G29400	0
chr1	17318976	17319348	374	17319172	142.08	23.0578	2.59857	20.6001	DEK2_peak_3542	AT1G47250	0
chr1	24929563	24930499	938	24929962	142.08	23.0578	2.59857	20.6001	DEK2_peak_5124	AT1G66820	0
chr1	28358302	28359376	1076	28358961	142.08	23.0578	2.59857	20.6001	DEK2_peak_6265	AT1G75530	0
chr2	15749903	15751066	1165	15750531	142.08	23.0578	2.59857	20.6001	DEK2_peak_9538	AT2G37520	0
chr4	8260611	8261233	624	8261019	142.08	23.0578	2.59857	20.6001	DEK2_peak_16775	AT4G14350	0
chr4	12107111	12107840	731	12107352	142.08	23.0578	2.59857	20.6001	DEK2_peak_17677	AT4G23100	0
chr5	14935563	14935989	428	14935811	142.08	23.0578	2.59857	20.6001	DEK2_peak_22521	AT5G37600	0
chr5	15712835	15713353	520	15713106	142.08	23.0578	2.59857	20.6001	DEK2_peak_22604	AT5G39240	0
chr5	24474379	24474897	520	24474692	142.08	23.0578	2.59857	20.6001	DEK2_peak_24835	AT5G60840	0
chr3	16192051	16193341	1292	16192233	142.98	22.8081	2.59833	20.3739	DEK2_peak_14002	AT3G44610	0
chr4	17279302	17282802	3502	17280872	149.23	24.05	2.59799	21.5292	DEK2_peak_19260	AT4G36648	0
chr3	22621639	22622198	561	22621874	191.23	30.2902	2.59771	27.3422	DEK2_peak_15685	AT3G61130	0
chr3	19063164	19064464	1302	19063505	167.1	26.757	2.59764	24.0569	DEK2_peak_14628	AT3G51350	0
chr1	20254671	20255141	472	20254946	162.64	25.8631	2.59739	23.2216	DEK2_peak_4120	AT1G54250	0
chr3	2702580	2703204	626	2702854	212.68	33.2769	2.59727	30.1166	DEK2_peak_11704	AT3G08870	0
chr1	27339962	27341051	1091	27340815	217.15	34.157	2.59697	30.9354	DEK2_peak_5920	AT1G72610	0
chr2	9247773	9248666	895	9248045	148.34	23.8511	2.59668	21.3448	DEK2_peak_7854	AT2G21620	0
chr2	17582395	17583080	687	17582715	214.46	33.602	2.59596	30.4198	DEK2_peak_10126	AT2G42190	0
chr3	1340984	1341564	582	1341179	155.49	24.8376	2.59587	22.2625	DEK2_peak_11276	AT3G04860	-361
chr1	30347891	30348963	1074	30348666	185.87	29.179	2.59541	26.3129	DEK2_peak_6956	AT1G80750	0
chr5	834228	835127	901	834628	185.87	29.179	2.59541	26.3129	DEK2_peak_20020	AT5G03380	0
chr5	278180	279089	911	278533	185.87	29.179	2.59541	26.3129	DEK2_peak_19823	AT5G01734	53
chr3	8692529	8693137	610	8693007	156.38	25.0063	2.59532	22.4223	DEK2_peak_13428	AT3G24068	0
chr2	18465385	18466900	1517	18466197	168.89	26.6417	2.59494	23.9479	DEK2_peak_10439	AT2G44800	0
chr4	8890227	8890692	467	8890536	157.27	25.1729	2.59465	22.5794	DEK2_peak_16902	AT4G15563	-187
chr1	28519642	28520272	632	28519887	181.4	28.6981	2.59461	25.8652	DEK2_peak_6337	AT1G75970	0
chr1	2445013	2446232	1221	2445284	183.19	29.0449	2.5942	26.1863	DEK2_peak_755	AT1G07910	0
chr1	469385	469993	610	469575	196.59	30.8519	2.59376	27.8588	DEK2_peak_159	AT1G02350	0
chr3	2380498	2381405	909	2381049	224.29	35.0577	2.59287	31.7725	DEK2_peak_11612	AT3G07440	0
chr3	17940651	17941423	774	17941186	160.85	25.4272	2.59268	22.8158	DEK2_peak_14313	AT3G48440	0
chr4	14311812	14312454	644	14312191	169.78	26.7656	2.59196	24.0644	DEK2_peak_18345	AT4G29040	0
chr5	735826	736885	1061	736064	151.91	24.0598	2.59173	21.5371	DEK2_peak_19975	AT5G03130	0
chr5	26555669	26556353	686	26555958	203.74	31.8031	2.59166	28.7458	DEK2_peak_25559	AT5G66530	0
chr1	29945101	29946322	1223	29946175	175.15	27.8064	2.59076	25.0327	DEK2_peak_6839	AT1G79590	0
chr1	19149197	19149679	484	19149493	149.23	23.9256	2.5902	21.4099	DEK2_peak_3864	AT1G51645	0
chr5	26732448	26733048	602	26732743	156.38	24.9166	2.58994	22.3365	DEK2_peak_25631	AT5G66950	0
chr2	18204853	18205553	702	18205072	168	26.3693	2.5896	23.6961	DEK2_peak_10337	AT2G43960	0
chr5	17390113	17390608	497	17390296	161.74	25.5512	2.58958	22.9323	DEK2_peak_22969	AT5G43330	0
chr3	5743021	5743599	580	5743321	198.38	31.1135	2.58935	28.1058	DEK2_peak_12640	AT3G16840	0
chr1	20105805	20106425	622	20106109	169.78	26.6879	2.58764	23.9915	DEK2_peak_4077	AT1G53850	0
chr3	22118121	22118582	463	22118358	169.78	26.6879	2.58764	23.9915	DEK2_peak_15531	AT3G59870	0
chr5	18958794	18959503	711	18959062	169.78	26.6879	2.58764	23.9915	DEK2_peak_23338	AT5G46720	0
chr2	12775882	12776511	631	12776236	151.02	24.2375	2.58755	21.7047	DEK2_peak_8706	AT2G29970	0
chr2	19640707	19641509	804	19640931	206.42	32.2379	2.58728	29.1504	DEK2_peak_10870	AT2G48000	0
chr4	10065066	10065579	515	10065422	143.87	22.8123	2.58696	20.3776	DEK2_peak_17193	AT4G18180	-47
chr5	26455697	26457672	1977	26456209	194.81	30.3524	2.5867	27.4005	DEK2_peak_25520	AT5G66200	0
chr2	14263057	14263884	829	14263326	151.02	24.2225	2.58663	21.6903	DEK2_peak_9095	AT2G33720	0
chr5	4206255	4207086	833	4206511	184.08	29.0693	2.58639	26.2094	DEK2_peak_21019	AT5G13190	0
chr5	23501075	23501800	727	23501437	216.25	33.7365	2.58633	30.5446	DEK2_peak_24546	AT5G58070	0
chr3	17986903	17987650	749	17987291	167.1	26.5533	2.58621	23.8681	DEK2_peak_14324	AT3G48530	0
chr4	10408786	10409323	539	10409025	167.1	26.5533	2.58621	23.8681	DEK2_peak_17290	AT4G19003	0
chr1	6920331	6921070	741	6920568	144.76	22.9668	2.58551	20.5241	DEK2_peak_2079	AT1G19940	0
chr5	5379101	5379535	436	5379278	146.55	23.3191	2.58543	20.8469	DEK2_peak_21370	AT5G16470	0
chr4	8612432	8612814	384	8612646	164.42	25.9974	2.58473	23.3492	DEK2_peak_16869	AT4G15080	0
chr3	10759123	10759640	519	10759329	194.81	30.3082	2.58455	27.3595	DEK2_peak_13862	AT3G28695	0
chr3	16917306	16917757	453	16917603	187.66	29.3139	2.58433	26.4347	DEK2_peak_14097	AT3G46060	0
chr4	18324273	18324924	653	18324683	187.66	29.3139	2.58433	26.4347	DEK2_peak_19651	AT4G39400	0
chr5	4728477	4729081	606	4728827	148.34	23.6416	2.58348	21.1473	DEK2_peak_21166	AT5G14660	0
chr5	409331	409902	573	409605	184.98	28.7593	2.58299	25.923	DEK2_peak_19870	AT5G02080	0
chr4	16654801	16657041	2242	16655203	208.21	32.4926	2.58283	29.3901	DEK2_peak_19072	AT4G34975	0
chr2	14367643	14368761	1120	14368085	141.19	22.6336	2.58234	20.2088	DEK2_peak_9127	AT2G34010	-95
chr1	4502969	4503998	1031	4503695	141.19	22.6336	2.58234	20.2088	DEK2_peak_1343	AT1G13195	0
chr1	18187387	18187844	459	18187650	141.19	22.6336	2.58234	20.2088	DEK2_peak_3670	AT1G49180	0
chr2	7570566	7571366	802	7571122	141.19	22.6336	2.58234	20.2088	DEK2_peak_7478	AT2G17440	0
chr2	7712272	7713370	1100	7712556	141.19	22.6336	2.58234	20.2088	DEK2_peak_7519	AT2G17760	0
chr2	8088026	8088638	614	8088412	141.19	22.6336	2.58234	20.2088	DEK2_peak_7599	AT2G18650	0
chr2	12433432	12434193	763	12433933	141.19	22.6336	2.58234	20.2088	DEK2_peak_8624	AT2G28950	0
chr2	16158510	16158983	475	16158785	141.19	22.6336	2.58234	20.2088	DEK2_peak_9678	AT2G38640	0
chr2	18192047	18193596	1551	18192952	141.19	22.6336	2.58234	20.2088	DEK2_peak_10333	AT2G43930	0
chr3	8332657	8333208	553	8332899	141.19	22.6336	2.58234	20.2088	DEK2_peak_13339	AT3G23300	0
chr5	8013322	8014683	1363	8013564	141.19	22.6336	2.58234	20.2088	DEK2_peak_22046	AT5G23760	0
chr5	23281044	23281567	525	23281344	147.44	23.4432	2.58209	20.9643	DEK2_peak_24465	AT5G57480	-76
chr1	5315174	5315665	493	5315397	171.57	26.9394	2.58205	24.2293	DEK2_peak_1643	AT1G15470	0
chr5	26416651	26417462	813	26416934	205.53	31.9383	2.58161	28.873	DEK2_peak_25508	AT5G66053	0
chr3	2754301	2754878	579	2754616	201.06	31.4709	2.58125	28.4366	DEK2_peak_11716	AT3G09030	0
chr1	26062523	26062991	470	26062708	151.91	23.8805	2.58062	21.3735	DEK2_peak_5462	AT1G69325	-214
chr1	27144956	27145955	1001	27145229	142.98	22.5257	2.57976	20.1115	DEK2_peak_5847	AT1G72141	0
chr1	107316	108693	1379	107605	200.17	31.2485	2.57906	28.2265	DEK2_peak_42	AT1G01260	-253
chr5	5157344	5158094	752	5157723	200.17	31.2485	2.57906	28.2265	DEK2_peak_21297	AT5G15802	0
chr5	21116047	21116712	667	21116376	200.17	31.2485	2.57906	28.2265	DEK2_peak_23833	AT5G51980	0
chr1	6560197	6561370	1175	6560942	176.93	27.5143	2.57874	24.757	DEK2_peak_1966	AT1G18990	0
chr1	25261883	25262383	502	25262109	150.13	23.9046	2.57787	21.3966	DEK2_peak_5207	AT1G67430	0
chr1	19104770	19106070	1302	19104958	197.49	30.6942	2.57774	27.7223	DEK2_peak_3852	AT1G51510	0
chr4	9589244	9589798	556	9589474	197.49	30.6942	2.57774	27.7223	DEK2_peak_17057	AT4G17040	0
chr1	11333479	11334094	617	11333703	218.04	33.8717	2.57693	30.6718	DEK2_peak_3149	AT1G31660	0
chr1	27189415	27190565	1152	27189677	151.02	24.0598	2.57659	21.5371	DEK2_peak_5868	AT1G72240	0
chr1	28260613	28261059	448	28260889	145.66	23.0021	2.57641	20.5571	DEK2_peak_6226	AT1G75310	0
chr1	3493617	3494255	640	3493845	194.81	30.1401	2.57638	27.2066	DEK2_peak_1050	AT1G10580	0
chr1	24163350	24164153	805	24163815	194.81	30.1401	2.57638	27.2066	DEK2_peak_4958	AT1G65040	0
chr2	428514	429156	644	428787	194.81	30.1401	2.57638	27.2066	DEK2_peak_7077	AT2G01930	0
chr5	1951815	1952925	1112	1952236	215.36	33.3179	2.57569	30.1554	DEK2_peak_20368	AT5G06390	0
chr1	7554326	7555118	794	7554736	143.87	22.6206	2.57446	20.2011	DEK2_peak_2256	AT1G21560	0
chr4	18059338	18059921	585	18059627	206.42	31.9433	2.57379	28.8779	DEK2_peak_19563	AT4G38630	0
chr5	5288874	5289837	965	5289120	155.49	24.466	2.57346	21.9171	DEK2_peak_21346	AT5G16200	365
chr1	8134166	8135048	884	8134376	153.7	24.1143	2.57339	21.5885	DEK2_peak_2434	AT1G22980	0
chr3	7089781	7090310	531	7090096	163.53	25.6218	2.5733	22.9988	DEK2_peak_13013	AT3G20320	0
chr1	23801848	23802757	911	23802365	183.19	28.6346	2.57315	25.8055	DEK2_peak_4864	AT1G64120	0
chr5	270411	270922	513	270649	210	32.211	2.57313	29.1246	DEK2_peak_19819	AT5G01720	0
chr5	8354482	8354893	413	8354733	144.76	22.7744	2.57305	20.3418	DEK2_peak_22129	AT5G24460	0
chr3	991483	992313	832	991689	159.06	25.1548	2.57271	22.5635	DEK2_peak_11165	AT3G03860	0
chr5	5994607	5995640	1035	5995232	151.91	23.7479	2.57242	21.2481	DEK2_peak_21528	AT5G18130	0
chr2	18066499	18067210	713	18066877	186.76	28.8957	2.57209	26.0461	DEK2_peak_10289	AT2G43510	0
chr2	951332	952134	804	951945	142.98	22.3924	2.57101	19.9856	DEK2_peak_7169	AT2G03150	0
chr3	22032917	22033359	444	22033108	142.98	22.3924	2.57101	19.9856	DEK2_peak_15513	AT3G59650	0
chr3	21910421	21910972	553	21910737	163.53	25.5776	2.57077	22.9575	DEK2_peak_15483	AT3G59280	0
chr2	15521548	15522667	1121	15522405	184.08	28.7593	2.57058	25.923	DEK2_peak_9466	AT2G36960	-253
chr3	18402804	18403177	375	18402988	168.89	26.199	2.57021	23.5347	DEK2_peak_14421	AT3G49640	0
chr1	4975615	4976492	879	4976291	141.19	22.4459	2.56998	20.0358	DEK2_peak_1511	AT1G14540	0
chr1	26703732	26704382	652	26703942	145.66	22.8988	2.56978	20.4597	DEK2_peak_5709	AT1G70810	0
chr2	12702156	12702651	497	12702407	154.59	24.2238	2.56941	21.6916	DEK2_peak_8693	AT2G29720	0
chr1	3347624	3349436	1814	3349070	146.55	23.0673	2.56936	20.6085	DEK2_peak_1006	AT1G10200	0
chr3	2916507	2917215	710	2916862	201.95	30.9675	2.56904	27.9677	DEK2_peak_11760	AT3G09500	0
chr1	19043647	19044323	678	19044154	160.85	25.023	2.56902	22.4381	DEK2_peak_3838	AT1G51360	0
chr1	27929344	27929730	388	27929552	182.29	28.3781	2.56895	25.5618	DEK2_peak_6108	AT1G74270	0
chr4	15841592	15842396	806	15841889	164.42	25.7019	2.56788	23.0702	DEK2_peak_18816	AT4G32820	0
chr1	10447248	10447954	708	10447662	178.72	27.651	2.56743	24.886	DEK2_peak_2970	AT1G29840	0
chr2	12177801	12178880	1081	12178490	178.72	27.651	2.56743	24.886	DEK2_peak_8532	AT2G28480	0
chr1	30019447	30019910	465	30019686	175.15	27.3621	2.56698	24.6189	DEK2_peak_6862	AT1G79810	0
chr3	20906203	20907040	839	20906617	140.3	22.2124	2.56612	19.8156	DEK2_peak_15196	AT3G56390	-314
chr2	15709133	15709783	652	15709479	140.3	22.2124	2.56612	19.8156	DEK2_peak_9528	AT2G37435	-25
chr3	21679362	21680319	959	21680131	140.3	22.2124	2.56612	19.8156	DEK2_peak_15430	AT3G58620	-7
chr1	7478954	7479471	519	7479156	140.3	22.2124	2.56612	19.8156	DEK2_peak_2232	AT1G21350	0
chr1	17330588	17330962	376	17330790	140.3	22.2124	2.56612	19.8156	DEK2_peak_3543	AT1G47278	0
chr1	29220139	29220613	476	29220360	140.3	22.2124	2.56612	19.8156	DEK2_peak_6582	AT1G77740	0
chr2	11293300	11294134	836	11293601	140.3	22.2124	2.56612	19.8156	DEK2_peak_8325	AT2G26550	0
chr3	10528956	10529416	462	10529157	140.3	22.2124	2.56612	19.8156	DEK2_peak_13839	AT3G28223	0
chr3	22414870	22415870	1002	22415550	140.3	22.2124	2.56612	19.8156	DEK2_peak_15643	AT3G60640	0
chr4	9787211	9787604	395	9787435	140.3	22.2124	2.56612	19.8156	DEK2_peak_17113	AT4G17570	0
chr4	15786787	15787449	664	15787160	140.3	22.2124	2.56612	19.8156	DEK2_peak_18804	AT4G32720	0
chr5	16571916	16572370	456	16572171	140.3	22.2124	2.56612	19.8156	DEK2_peak_22787	AT5G41401	0
chr5	17195867	17196596	731	17196395	140.3	22.2124	2.56612	19.8156	DEK2_peak_22931	AT5G42890	0
chr1	3514578	3515032	456	3514738	154.59	24.1651	2.56585	21.637	DEK2_peak_1053	AT1G10630	0
chr4	13638208	13639418	1212	13638610	176.04	27.5143	2.56579	24.757	DEK2_peak_18136	AT4G27230	0
chr5	4865853	4866738	887	4866062	176.04	27.5143	2.56579	24.757	DEK2_peak_21208	AT5G15020	0
chr1	3920216	3920699	485	3920438	142.08	22.5553	2.56568	20.1395	DEK2_peak_1167	AT1G11660	0
chr5	6094826	6095788	964	6095608	146.55	23.0084	2.56561	20.5632	DEK2_peak_21561	AT5G18400	0
chr2	16391395	16392100	707	16391685	155.49	24.3314	2.56536	21.7943	DEK2_peak_9744	AT2G39250	-322
chr1	7087811	7089514	1705	7088256	155.49	24.3314	2.56536	21.7943	DEK2_peak_2129	AT1G20450	92
chr1	28144155	28146285	2132	28144990	214.46	32.9012	2.56505	29.7693	DEK2_peak_6186	AT1G74940	0
chr4	18062207	18062683	478	18062475	214.46	32.9012	2.56505	29.7693	DEK2_peak_19564	AT4G38640	0
chr5	19286899	19287912	1015	19287540	152.81	23.7767	2.56343	21.275	DEK2_peak_23425	AT5G47550	0
chr3	1767138	1768871	1735	1768576	229.66	34.9717	2.56284	31.6916	DEK2_peak_11413	AT3G05910	0
chr5	1928025	1928513	490	1928247	170.68	26.4059	2.56236	23.7308	DEK2_peak_20359	AT5G06310	0
chr4	13023364	13024770	1408	13024592	167.1	26.1187	2.56189	23.4593	DEK2_peak_17962	AT4G25500	0
chr1	8908865	8910190	1327	8909123	165.32	25.7675	2.56171	23.1322	DEK2_peak_2586	AT1G25390	-11
chr1	27273579	27274639	1062	27273889	188.55	29.0329	2.56149	26.1755	DEK2_peak_5895	AT1G72440	0
chr1	46544	47661	1119	46908	168	25.8523	2.56056	23.2119	DEK2_peak_12	AT1G01080	0
chr3	9182341	9182766	427	9182543	147.44	23.0846	2.55938	20.6252	DEK2_peak_13523	AT3G25220	0
chr5	7945757	7946528	773	7946337	165.32	25.7145	2.55871	23.0821	DEK2_peak_22024	AT5G23575	0
chr3	4024120	4024933	815	4024556	191.23	29.496	2.55864	26.6064	DEK2_peak_12068	AT3G12670	0
chr5	7394089	7394631	544	7394354	199.27	30.6358	2.55842	27.6675	DEK2_peak_21894	AT5G22330	0
chr3	7066025	7067292	1269	7066861	239.49	36.3518	2.55835	32.9769	DEK2_peak_13003	AT3G20260	0
chr3	3366087	3366893	808	3366599	204.63	31.2573	2.55828	28.2341	DEK2_peak_11874	AT3G10745	0
chr4	15429786	15430573	789	15430170	183.19	28.342	2.55817	25.5335	DEK2_peak_18710	AT4G31895	0
chr1	9337810	9338770	962	9338514	141.19	22.254	2.55736	19.8552	DEK2_peak_2708	AT1G26930	-24
chr2	17480526	17481260	736	17480944	144.76	22.5299	2.55725	20.1152	DEK2_peak_10091	AT2G41890	-174
chr5	2284535	2284976	443	2284741	184.08	28.4948	2.55712	25.6728	DEK2_peak_20468	AT5G07280	-64
chr1	28726955	28728379	1426	28727985	163.53	25.3287	2.55651	22.7221	DEK2_peak_6408	AT1G76550	0
chr5	24959011	24959713	704	24959395	198.38	30.4146	2.55615	27.46	DEK2_peak_24982	AT5G62160	-394
chr1	6395504	6396084	582	6395786	142.08	22.3931	2.55509	19.9863	DEK2_peak_1918	AT1G18580	0
chr5	23997579	23998898	1321	23998156	177.83	27.2355	2.55467	24.4988	DEK2_peak_24698	AT5G59540	0
chr2	18339119	18339626	509	18339446	142.98	22.1301	2.55381	19.7428	DEK2_peak_10386	AT2G44440	0
chr4	15478747	15479600	855	15479134	175.15	27.0973	2.55284	24.368	DEK2_peak_18723	AT4G32010	0
chr4	15616982	15617508	528	15617280	157.27	24.4687	2.55281	21.9194	DEK2_peak_18762	AT4G32350	0
chr1	3944945	3945992	1049	3945472	140.3	21.9975	2.55189	19.6167	DEK2_peak_1180	AT1G11700	0
chr5	21873019	21874586	1569	21874228	154.59	23.9313	2.55171	21.4154	DEK2_peak_24041	AT5G53880	0
chr3	6577407	6577817	412	6577600	188.55	28.8324	2.55149	25.9918	DEK2_peak_12888	AT3G19050	0
chr2	17918233	17919078	847	17918778	172.47	26.5508	2.55133	23.8675	DEK2_peak_10230	AT2G43090	0
chr3	1601102	1601768	668	1601459	164.42	25.4095	2.55125	22.7987	DEK2_peak_11365	AT3G05525	0
chr2	14707856	14708526	672	14708191	190.34	29.1709	2.55116	26.3055	DEK2_peak_9209	AT2G34860	0
chr5	25011324	25012073	751	25011871	156.38	24.2678	2.55115	21.7338	DEK2_peak_25000	AT5G62270	0
chr2	13411785	13412156	373	13411993	168	25.6818	2.55102	23.0512	DEK2_peak_8882	AT2G31490	0
chr5	4553467	4555419	1954	4554991	172.47	26.5439	2.55096	23.8608	DEK2_peak_21117	AT5G14110	0
chr5	17860957	17861944	989	17861753	157.27	24.436	2.55087	21.8885	DEK2_peak_23090	AT5G44340	0
chr1	4043557	4044731	1176	4044036	154.59	23.9147	2.55071	21.4009	DEK2_peak_1204	AT1G11960	0
chr5	26129712	26130701	991	26130193	139.4	21.7942	2.54989	19.4251	DEK2_peak_25405	AT5G65390	-374
chr3	8554783	8555105	324	8554956	139.4	21.7942	2.54989	19.4251	DEK2_peak_13392	AT3G23740	-38
chr1	3545108	3546013	907	3545710	139.4	21.7942	2.54989	19.4251	DEK2_peak_1066	AT1G10682	0
chr2	13190148	13190830	684	13190453	139.4	21.7942	2.54989	19.4251	DEK2_peak_8825	AT2G30990	0
chr4	3766371	3766815	446	3766644	139.4	21.7942	2.54989	19.4251	DEK2_peak_16385	AT4G06634	0
chr5	7341776	7342162	388	7341984	139.4	21.7942	2.54989	19.4251	DEK2_peak_21878	AT5G22140	0
chr3	7632918	7633677	761	7633094	139.4	21.7942	2.54989	19.4251	DEK2_peak_13149	AT3G21680	176
chr3	22692659	22693837	1180	22693086	187.66	28.6184	2.54941	25.7902	DEK2_peak_15713	AT3G61310	0
chr1	6033692	6034382	692	6034088	200.17	30.615	2.54932	27.6478	DEK2_peak_1836	AT1G17550	0
chr1	27896198	27896796	600	27896466	169.78	25.9909	2.54902	23.3434	DEK2_peak_6101	AT1G74170	0
chr4	8310016	8310588	574	8310291	140.3	21.9536	2.54899	19.576	DEK2_peak_16789	AT4G14455	0
chr1	10638614	10639075	463	10638909	151.91	23.3611	2.54854	20.887	DEK2_peak_3010	AT1G30230	0
chr2	137716	138341	627	137972	164.42	25.3514	2.54794	22.7434	DEK2_peak_7000	AT2G01260	0
chr2	10122020	10122720	702	10122301	201.06	30.7393	2.54709	27.7522	DEK2_peak_8076	AT2G23770	0
chr1	8349981	8350803	824	8350240	167.1	25.8523	2.54702	23.2119	DEK2_peak_2488	AT1G23550	0
chr5	23549228	23549878	652	23549466	167.1	25.8523	2.54702	23.2119	DEK2_peak_24553	AT5G58200	0
chr4	8499918	8500434	518	8500161	200.17	30.5529	2.54642	27.5898	DEK2_peak_16841	AT4G14790	0
chr3	20963695	20965051	1358	20964846	165.32	25.476	2.54524	22.8609	DEK2_peak_15211	AT3G56590	0
chr3	3770299	3770768	471	3770545	164.42	25.299	2.54497	22.6945	DEK2_peak_12011	AT3G11910	0
chr5	8122598	8123090	494	8122917	146.55	22.6684	2.54398	20.2417	DEK2_peak_22078	AT5G24030	0
chr4	8415466	8416220	756	8415958	179.61	27.3745	2.54386	24.6304	DEK2_peak_16816	AT4G14680	-75
chr1	1817153	1817604	453	1817352	159.06	24.656	2.54352	22.0953	DEK2_peak_559	AT1G05970	0
chr2	14450647	14451214	569	14450933	172.47	26.406	2.54348	23.7309	DEK2_peak_9146	AT2G34220	111
chr4	9663365	9664062	699	9663671	142.98	21.9708	2.54339	19.5927	DEK2_peak_17074	AT4G17230	0
chr3	9550963	9551589	628	9551215	159.06	24.6415	2.54267	22.082	DEK2_peak_13619	AT3G26125	-223
chr3	1554357	1554818	463	1554581	139.4	21.6832	2.5425	19.3249	DEK2_peak_11354	AT3G05410	0
chr4	16344608	16345519	913	16345130	179.61	27.3361	2.54185	24.5937	DEK2_peak_18962	AT4G34131	0
chr1	30080677	30081493	818	30081134	225.19	34.0068	2.54143	30.7997	DEK2_peak_6877	AT1G79960	-128
chr5	23575929	23576414	487	23576126	158.17	24.4443	2.54119	21.8963	DEK2_peak_24559	AT5G58310	0
chr5	6775493	6776321	830	6776116	192.12	29.3097	2.54111	26.4308	DEK2_peak_21738	AT5G20060	0
chr4	13383572	13384117	547	13383752	198.38	30.0774	2.54019	27.1478	DEK2_peak_18071	AT4G26500	0
chr4	14266463	14267400	939	14266805	155.49	23.911	2.54012	21.4009	DEK2_peak_18338	AT4G28910	0
chr3	16968861	16969393	534	16969146	174.25	26.6828	2.53989	23.9868	DEK2_peak_14111	AT3G46200	0
chr5	7663876	7664658	784	7664316	189.44	28.7577	2.53925	25.9221	DEK2_peak_21949	AT5G22910	-47
chr5	22724916	22725496	582	22725244	189.44	28.7577	2.53925	25.9221	DEK2_peak_24301	AT5G56130	0
chr5	23817528	23817955	429	23817731	145.66	22.4176	2.53895	20.009	DEK2_peak_24629	AT5G59000	-229
chr1	2268831	2269937	1108	2269148	150.13	23.273	2.53877	20.8031	DEK2_peak_699	AT1G07390	0
chr2	9085414	9086569	1157	9086095	139.4	21.6252	2.53864	19.2703	DEK2_peak_7818	AT2G21210	0
chr1	25755750	25757395	1647	25756423	143.87	22.0668	2.53846	19.6822	DEK2_peak_5366	AT1G68585	0
chr3	17700302	17701142	842	17700861	156.38	24.0536	2.53839	21.532	DEK2_peak_14264	AT3G47960	0
chr5	21356847	21357262	417	21357027	156.38	24.0536	2.53839	21.532	DEK2_peak_23895	AT5G52650	0
chr5	24708361	24710367	2008	24709568	156.38	24.0536	2.53839	21.532	DEK2_peak_24915	AT5G61445	0
chr3	6127632	6128701	1071	6128345	176.93	26.7466	2.53788	24.0471	DEK2_peak_12753	AT3G17900	0
chr1	20785389	20785879	492	20785630	171.57	26.1304	2.53782	23.4703	DEK2_peak_4226	AT1G55615	0
chr3	5667571	5668138	569	5667821	171.57	26.1304	2.53782	23.4703	DEK2_peak_12612	AT3G16630	0
chr4	17899328	17899895	569	17899632	203.74	30.6145	2.53656	27.6474	DEK2_peak_19519	AT4G38130	0
chr4	13423713	13424851	1140	13424587	159.95	24.2808	2.53572	21.7463	DEK2_peak_18083	AT4G26610	0
chr4	15277335	15277911	578	15277584	168.89	25.5784	2.53568	22.9579	DEK2_peak_18653	AT4G31510	-116
chr4	16801100	16802310	1212	16801914	168.89	25.5784	2.53568	22.9579	DEK2_peak_19121	AT4G35310	0
chr3	93289	94540	1253	93570	184.08	28.0662	2.53537	25.2736	DEK2_peak_10905	AT3G01300	0
chr4	10148569	10149335	768	10148949	184.08	28.0662	2.53537	25.2736	DEK2_peak_17214	AT4G18360	0
chr3	2939288	2939668	382	2939474	174.25	26.5833	2.53456	23.8925	DEK2_peak_11766	AT3G09560	0
chr1	9378042	9378748	708	9378398	142.98	21.8269	2.53399	19.4569	DEK2_peak_2721	AT1G27020	0
chr5	7809725	7810370	647	7810071	138.51	21.379	2.53366	19.0373	DEK2_peak_21974	AT5G23210	-313
chr5	13916407	13917075	670	13916755	138.51	21.379	2.53366	19.0373	DEK2_peak_22469	AT5G35750	-70
chr1	10542125	10543301	1178	10542977	138.51	21.379	2.53366	19.0373	DEK2_peak_2991	AT1G30050	0
chr1	19571946	19573316	1372	19572886	138.51	21.379	2.53366	19.0373	DEK2_peak_3937	AT1G52540	0
chr3	21836036	21836798	764	21836525	138.51	21.379	2.53366	19.0373	DEK2_peak_15472	AT3G59080	0
chr4	1045767	1047196	1431	1047042	138.51	21.379	2.53366	19.0373	DEK2_peak_16206	AT4G02380	0
chr5	15910957	15911529	574	15911220	138.51	21.379	2.53366	19.0373	DEK2_peak_22639	AT5G39760	0
chr3	5257778	5258802	1026	5258363	166.21	25.4383	2.53348	22.8259	DEK2_peak_12487	AT3G15534	-74
chr3	20064832	20065275	445	20065058	181.4	27.5143	2.53335	24.757	DEK2_peak_14954	AT3G54200	-390
chr4	16696549	16698041	1494	16696858	196.59	29.5893	2.53324	26.6939	DEK2_peak_19091	AT4G35080	-293
chr3	460832	461343	513	461025	155.49	23.7957	2.53321	21.2926	DEK2_peak_11012	AT3G02300	0
chr5	25277109	25277910	803	25277541	211.78	31.6635	2.53314	28.6162	DEK2_peak_25103	AT5G62990	0
chr5	22074241	22074732	493	22074524	152.81	23.2774	2.53287	20.8074	DEK2_peak_24107	AT5G54365	0
chr5	4481898	4482513	617	4482115	151.02	23.3398	2.53234	20.8668	DEK2_peak_21095	AT5G13900	-9
chr2	17960229	17960915	688	17960599	163.53	24.8949	2.53172	22.3168	DEK2_peak_10247	AT2G43210	0
chr2	8987288	8987726	440	8987525	159.95	24.2092	2.53153	21.679	DEK2_peak_7792	AT2G20890	0
chr4	13346323	13346806	485	13346563	193.91	29.0385	2.53132	26.1804	DEK2_peak_18061	AT4G26400	0
chr3	18871450	18872623	1175	18872408	148.34	22.8079	2.53115	20.3737	DEK2_peak_14561	AT3G50764	0
chr1	26909445	26910079	636	26909884	149.23	22.9458	2.52911	20.5043	DEK2_peak_5776	AT1G71400	0
chr4	13231682	13232333	653	13232042	160.85	24.3342	2.52888	21.7967	DEK2_peak_18024	AT4G26110	-262
chr1	18087754	18088218	466	18087958	160.85	24.3342	2.52888	21.7967	DEK2_peak_3646	AT1G48900	0
chr2	17325302	17326365	1065	17325629	160.85	24.3342	2.52888	21.7967	DEK2_peak_10049	AT2G41530	0
chr2	18007244	18007920	678	18007598	160.85	24.3342	2.52888	21.7967	DEK2_peak_10266	AT2G43340	0
chr4	145532	146030	500	145740	160.85	24.3342	2.52888	21.7967	DEK2_peak_15990	AT4G00335	0
chr1	10381967	10382441	476	10382126	145.66	22.2552	2.52857	19.856	DEK2_peak_2963	AT1G29690	0
chr5	1608902	1609407	507	1609158	139.4	21.4663	2.52808	19.1203	DEK2_peak_20257	AT5G05440	0
chr3	7070793	7071531	740	7071220	218.93	32.4959	2.52796	29.3931	DEK2_peak_13004	AT3G20280	0
chr3	10327681	10328626	947	10328277	218.93	32.4959	2.52796	29.3931	DEK2_peak_13804	AT3G27865	0
chr3	22744244	22745858	1616	22745442	203.74	30.4218	2.52767	27.4667	DEK2_peak_15729	AT3G61470	0
chr2	108540	109780	1242	108837	188.55	28.3468	2.52733	25.538	DEK2_peak_6990	AT2G01180	0
chr2	19557471	19560084	2615	19559767	188.55	28.3468	2.52733	25.538	DEK2_peak_10847	AT2G47740	0
chr1	9399119	9399765	648	9399472	173.36	26.2707	2.52694	23.6027	DEK2_peak_2726	AT1G27070	0
chr5	24765084	24766864	1782	24765377	173.36	26.2707	2.52694	23.6027	DEK2_peak_24931	AT5G61590	0
chr5	21044053	21044598	547	21044255	164.42	24.9768	2.5267	22.3941	DEK2_peak_23818	AT5G51795	0
chr1	10715306	10716813	1509	10715663	201.06	30.2808	2.52576	27.3335	DEK2_peak_3034	AT1G30360	0
chr3	1034615	1035542	929	1034807	156.38	23.8344	2.52536	21.3296	DEK2_peak_11180	AT3G04000	0
chr4	15400254	15400780	528	15400555	156.38	23.8344	2.52536	21.3296	DEK2_peak_18695	AT4G31830	367
chr1	4610583	4611766	1185	4610796	185.87	27.7961	2.52526	25.0231	DEK2_peak_1389	AT1G13440	0
chr5	25097281	25098357	1078	25097754	170.68	25.7194	2.52468	23.0865	DEK2_peak_25043	AT5G62520	0
chr1	5139401	5139977	578	5139575	196.59	29.3994	2.52418	26.5158	DEK2_peak_1580	AT1G14900	0
chr1	11000586	11001041	457	11000738	140.3	21.5769	2.52413	19.2245	DEK2_peak_3098	AT1G30910	0
chr1	22885708	22886749	1043	22886420	155.49	23.6413	2.52398	21.147	DEK2_peak_4628	AT1G61910	-341
chr3	4945332	4945723	393	4945505	155.49	23.6413	2.52398	21.147	DEK2_peak_12374	AT3G14720	0
chr5	9835627	9836065	440	9835811	198.38	29.7302	2.52379	26.8265	DEK2_peak_22378	AT5G27770	0
chr3	5598608	5600011	1405	5599698	153.7	23.288	2.52315	20.8172	DEK2_peak_12593	AT3G16470	0
chr5	17994703	17995339	638	17994900	140.3	21.5618	2.52313	19.21	DEK2_peak_23134	AT5G44610	-27
chr1	9066025	9067180	1157	9066514	168	25.1685	2.52235	22.5755	DEK2_peak_2635	AT1G26210	0
chr3	23264532	23265705	1175	23264846	195.7	29.18	2.52178	26.3137	DEK2_peak_15900	AT3G62940	0
chr2	14827160	14827588	430	14827387	156.38	23.7629	2.52111	21.2622	DEK2_peak_9235	AT2G35170	0
chr2	849452	850208	758	849925	175.15	26.4932	2.52069	23.8128	DEK2_peak_7155	AT2G02910	0
chr4	12421340	12422190	852	12421525	186.76	27.867	2.52031	25.0902	DEK2_peak_17777	AT4G23890	0
chr4	12408247	12408596	351	12408408	156.38	23.7486	2.52026	21.2488	DEK2_peak_17769	AT4G23850	0
chr1	5286397	5287123	728	5286842	165.32	25.0269	2.51994	22.4416	DEK2_peak_1630	AT1G15370	0
chr2	19111611	19112341	732	19111909	154.59	23.3845	2.51875	20.9084	DEK2_peak_10679	AT2G46540	0
chr3	8424242	8424971	731	8424440	177.83	26.5536	2.51869	23.8681	DEK2_peak_13359	AT3G23490	0
chr5	5358447	5359274	829	5358648	164.42	24.834	2.51862	22.2589	DEK2_peak_21360	AT5G16370	0
chr5	16979557	16979940	385	16979752	150.13	22.9415	2.51833	20.5001	DEK2_peak_22890	AT5G42460	0
chr2	15737204	15737938	736	15737584	199.27	29.7739	2.51789	26.8608	DEK2_peak_9535	AT2G37478	0
chr1	29461045	29461797	754	29461323	137.61	20.967	2.51743	18.6542	DEK2_peak_6691	AT1G78300	0
chr2	15601997	15603767	1772	15602342	137.61	20.967	2.51743	18.6542	DEK2_peak_9494	AT2G37140	0
chr3	7818819	7819388	571	7819014	137.61	20.967	2.51743	18.6542	DEK2_peak_13191	AT3G22160	0
chr4	5417167	5417491	326	5417339	137.61	20.967	2.51743	18.6542	DEK2_peak_16402	AT4G08520	0
chr4	8883671	8883983	314	8883839	137.61	20.967	2.51743	18.6542	DEK2_peak_16900	AT4G15560	0
chr4	8984007	8985164	1159	8984794	137.61	20.967	2.51743	18.6542	DEK2_peak_16916	AT4G15800	0
chr5	17618662	17619022	362	17618784	137.61	20.967	2.51743	18.6542	DEK2_peak_23015	AT5G43820	0
chr5	18530589	18531057	470	18530860	137.61	20.967	2.51743	18.6542	DEK2_peak_23236	AT5G45680	0
chr2	15139346	15140010	666	15139668	137.61	20.967	2.51743	18.6542	DEK2_peak_9340	AT2G36053	350
chr1	3979103	3979497	396	3979289	141.19	21.6445	2.51742	19.2885	DEK2_peak_1187	AT1G11780	0
chr1	11877291	11877648	359	11877462	144.76	21.9057	2.51707	19.5304	DEK2_peak_3284	AT1G32790	0
chr4	17034756	17035161	407	17034940	159.06	24.195	2.51665	21.6653	DEK2_peak_19196	AT4G35987	0
chr2	1717440	1717958	520	1717663	175.15	26.4118	2.51637	23.736	DEK2_peak_7259	AT2G04880	0
chr1	9963235	9963678	445	9963477	148.34	22.5629	2.51584	20.1469	DEK2_peak_2856	AT1G28380	0
chr2	15649026	15649783	759	15649209	187.66	27.9381	2.51542	25.1523	DEK2_peak_9510	AT2G37270	0
chr3	22362283	22364216	1935	22362774	187.66	27.9381	2.51542	25.1523	DEK2_peak_15624	AT3G60520	0
chr2	15288926	15290265	1341	15289990	137.61	20.9297	2.51492	18.6227	DEK2_peak_9390	AT2G36430	0
chr4	17225139	17227085	1948	17226619	159.95	23.925	2.51492	21.4096	DEK2_peak_19247	AT4G36500	0
chr3	19393414	19394023	611	19393822	151.02	23.0522	2.51474	20.6001	DEK2_peak_14728	AT3G52290	0
chr4	13036116	13036876	762	13036516	141.19	21.6016	2.51462	19.2479	DEK2_peak_17964	AT4G25520	0
chr3	4815322	4815770	450	4815596	168.89	25.1925	2.51429	22.5984	DEK2_peak_12334	AT3G14400	0
chr3	6932820	6935027	2209	6933893	141.19	21.5873	2.51368	19.2344	DEK2_peak_12974	AT3G19930	0
chr3	6322916	6323291	377	6323127	144.76	21.8448	2.51316	19.473	DEK2_peak_12807	AT3G18410	0
chr1	20252395	20252907	514	20252596	163.53	24.567	2.51305	22.0118	DEK2_peak_4119	AT1G54240	0
chr5	25703617	25705795	2180	25704974	237.7	34.8537	2.51261	31.5806	DEK2_peak_25244	AT5G64260	0
chr4	13206798	13207319	523	13207035	157.27	23.7828	2.51228	21.2805	DEK2_peak_18013	AT4G26040	0
chr1	5088687	5089151	466	5088944	169.78	25.3109	2.51153	22.7047	DEK2_peak_1561	AT1G14770	0
chr1	7400509	7402023	1516	7401416	169.78	25.3109	2.51153	22.7047	DEK2_peak_2214	AT1G21130	0
chr1	3610261	3611861	1602	3610565	222.51	32.7801	2.51131	29.6553	DEK2_peak_1083	AT1G10840	0
chr5	2473553	2474847	1296	2474495	184.98	27.3349	2.51047	24.5925	DEK2_peak_20512	AT5G07770	0
chr5	3212120	3212678	560	3212347	142.08	21.7029	2.51022	19.3435	DEK2_peak_20723	AT5G10235	0
chr2	15639429	15639966	539	15639649	173.36	25.9592	2.5102	23.3132	DEK2_peak_9507	AT2G37230	0
chr3	22291105	22292085	982	22291536	174.25	26.1266	2.51017	23.467	DEK2_peak_15597	AT3G60318	0
chr3	1415774	1416299	527	1416055	182.29	27.2257	2.50986	24.4897	DEK2_peak_11306	AT3G05060	0
chr3	22247866	22249323	1459	22248102	178.72	26.5422	2.50926	23.8595	DEK2_peak_15579	AT3G60200	0
chr1	23039616	23040107	493	23039887	142.08	21.6838	2.50899	19.3255	DEK2_peak_4660	AT1G62310	-7
chr1	3180188	3181166	980	3180606	232.34	34.1626	2.50899	30.9407	DEK2_peak_952	AT1G09800	0
chr1	28634118	28635049	933	28634624	153.7	23.0467	2.50855	20.5992	DEK2_peak_6378	AT1G76330	0
chr4	13160379	13160820	443	13160577	179.61	26.6961	2.50853	23.999	DEK2_peak_18000	AT4G25890	0
chr3	3857210	3858073	865	3857580	192.12	28.6301	2.50811	25.8011	DEK2_peak_12023	AT3G12100	0
chr1	2876296	2877660	1366	2877485	145.66	21.9317	2.50795	19.5548	DEK2_peak_871	AT1G08940	-32
chr5	552722	553267	547	552958	204.63	30.1567	2.50774	27.2222	DEK2_peak_19915	AT5G02490	-75
chr3	18513687	18514515	830	18514023	151.91	22.6813	2.50676	20.2528	DEK2_peak_14463	AT3G49940	0
chr4	14277079	14277982	905	14277650	159.95	23.784	2.50669	21.2816	DEK2_peak_18341	AT4G28950	-12
chr4	12349582	12350283	703	12350063	168.89	25.0516	2.5065	22.4648	DEK2_peak_17744	AT4G23710	0
chr2	5541123	5541662	541	5541447	164.42	24.618	2.50641	22.0595	DEK2_peak_7311	AT2G13360	0
chr1	4058792	4059577	787	4059254	164.42	24.618	2.50641	22.0595	DEK2_peak_1207	AT1G12015	305
chr1	44840	45540	702	45116	189.44	28.0807	2.50584	25.2867	DEK2_peak_11	AT1G01073	163
chr5	5642491	5643075	586	5642781	175.15	26.2092	2.50563	23.5442	DEK2_peak_21431	AT5G17160	0
chr1	21364497	21365152	657	21364704	201.95	29.6081	2.50561	26.7113	DEK2_peak_4349	AT1G57680	0
chr2	15030156	15030730	576	15030401	214.46	31.54	2.5054	28.502	DEK2_peak_9295	AT2G35750	0
chr5	6217608	6218302	696	6217836	161.74	24.068	2.50372	21.5444	DEK2_peak_21590	AT5G18650	0
chr1	5392726	5393211	487	5392943	174.25	26.0035	2.50361	23.3549	DEK2_peak_1663	AT1G15680	-196
chr3	6554910	6557030	2122	6556118	146.55	22.0287	2.50345	19.6458	DEK2_peak_12882	AT3G19000	0
chr2	232148	232809	663	232458	224.29	32.923	2.50327	29.7898	DEK2_peak_7029	AT2G01510	0
chr1	3092915	3093893	980	3093487	200.17	29.6166	2.5027	26.7193	DEK2_peak_926	AT1G09560	0
chr5	24062074	24062550	478	24062262	170.68	25.302	2.50186	22.6974	DEK2_peak_24713	AT5G59720	-27
chr3	20505193	20505906	715	20505480	155.49	23.269	2.50175	20.7993	DEK2_peak_15067	AT3G55310	0
chr3	815144	815820	678	815525	139.4	21.0667	2.50159	18.7478	DEK2_peak_11123	AT3G03440	0
chr3	5574423	5575276	855	5574659	136.72	20.558	2.5012	18.2718	DEK2_peak_12584	AT3G16415	-131
chr4	17633971	17634746	777	17634495	136.72	20.558	2.5012	18.2718	DEK2_peak_19418	AT4G37530	-38
chr1	5054895	5055671	778	5055354	136.72	20.558	2.5012	18.2718	DEK2_peak_1547	AT1G14690	0
chr1	24348881	24349608	729	24349274	136.72	20.558	2.5012	18.2718	DEK2_peak_4987	AT1G65486	0
chr1	26533272	26534083	813	26533519	136.72	20.558	2.5012	18.2718	DEK2_peak_5637	AT1G70400	0
chr2	9538760	9540091	1333	9539932	136.72	20.558	2.5012	18.2718	DEK2_peak_7919	AT2G22470	0
chr2	11149824	11151326	1504	11150348	136.72	20.558	2.5012	18.2718	DEK2_peak_8280	AT2G26190	0
chr4	17181136	17182510	1376	17182198	136.72	20.558	2.5012	18.2718	DEK2_peak_19226	AT4G36360	0
chr5	22681144	22681539	397	22681303	136.72	20.558	2.5012	18.2718	DEK2_peak_24287	AT5G56010	0
chr5	24767253	24767962	711	24767666	136.72	20.558	2.5012	18.2718	DEK2_peak_24932	AT5G61600	0
chr3	5454449	5455134	687	5454667	184.08	27.3885	2.50111	24.6429	DEK2_peak_12541	AT3G16080	0
chr5	1570342	1571335	995	1571073	184.08	27.3885	2.50111	24.6429	DEK2_peak_20242	AT5G05300	0
chr3	1465746	1466408	664	1466032	171.57	25.454	2.50104	22.8398	DEK2_peak_11328	AT3G05170	-165
chr5	19217608	19219960	2354	19218733	152.81	22.7524	2.50087	20.3212	DEK2_peak_23407	AT5G47370	0
chr4	8207290	8207723	435	8207477	165.32	24.6761	2.50025	22.1145	DEK2_peak_16766	AT4G14240	0
chr4	15005991	15006579	590	15006303	166.21	24.8294	2.49948	22.2545	DEK2_peak_18583	AT4G30820	0
chr4	7309546	7310321	777	7309888	162.64	24.1598	2.4994	21.632	DEK2_peak_16618	AT4G12300	0
chr1	6153750	6154323	575	6154085	193.91	28.3678	2.49887	25.5572	DEK2_peak_1863	AT1G17880	0
chr1	6684087	6684821	736	6684573	181.4	26.8393	2.49865	24.1337	DEK2_peak_2010	AT1G19340	0
chr3	22735069	22735934	867	22735737	181.4	26.8393	2.49865	24.1337	DEK2_peak_15723	AT3G61440	0
chr2	16745230	16745810	582	16745489	168.89	24.9049	2.49839	22.3258	DEK2_peak_9874	AT2G40100	0
chr3	21128261	21128648	389	21128512	168.89	24.9049	2.49839	22.3258	DEK2_peak_15275	AT3G57090	0
chr5	17753000	17753400	402	17753233	156.38	23.3748	2.4981	20.8988	DEK2_peak_23057	AT5G44100	-284
chr1	19848321	19849919	1600	19848586	156.38	23.3748	2.4981	20.8988	DEK2_peak_4006	AT1G53233	-112
chr3	1268054	1269253	1201	1268283	156.38	23.3748	2.4981	20.8988	DEK2_peak_11251	AT3G04670	0
chr5	15724133	15724626	495	15724420	140.3	21.1779	2.49789	18.8528	DEK2_peak_22605	AT5G39250	0
chr1	201245	202389	1146	201943	163.53	24.2991	2.49782	21.7634	DEK2_peak_76	AT1G01560	0
chr3	3436035	3436628	595	3436392	216.25	31.6835	2.49715	28.6327	DEK2_peak_11899	AT3G10970	0
chr3	23088900	23089718	820	23089504	216.25	31.6835	2.49715	28.6327	DEK2_peak_15844	AT3G62390	0
chr4	13827607	13828692	1087	13827979	163.53	24.2851	2.49703	21.7505	DEK2_peak_18197	AT4G27700	0
chr5	3356464	3356909	447	3356737	153.7	22.8497	2.49664	20.4129	DEK2_peak_20768	AT5G10620	0
chr5	4673755	4674289	536	4673978	191.23	28.2239	2.4965	25.4218	DEK2_peak_21155	AT5G14495	0
chr2	17114692	17115481	791	17115220	137.61	20.6466	2.4959	18.3562	DEK2_peak_9977	AT2G41010	0
chr1	232343	233241	900	232748	154.59	23.0031	2.49584	20.5581	DEK2_peak_86	AT1G01640	0
chr3	4705374	4706249	877	4705839	166.21	24.7611	2.49567	22.1948	DEK2_peak_12284	AT3G14172	0
chr2	18258176	18258767	593	18258417	182.29	26.9444	2.4955	24.2342	DEK2_peak_10357	AT2G44150	0
chr4	16888099	16888699	602	16888292	153.7	22.825	2.49515	20.3897	DEK2_peak_19144	AT4G35570	0
chr1	20259087	20260001	916	20259668	140.3	21.1355	2.49511	18.8135	DEK2_peak_4122	AT1G54270	0
chr5	21986748	21987629	883	21987276	151.02	22.7256	2.49481	20.2954	DEK2_peak_24087	AT5G54170	0
chr1	24894473	24894889	418	24894700	141.19	21.2938	2.49455	18.9626	DEK2_peak_5113	AT1G66750	0
chr3	1161001	1161544	545	1161314	157.27	23.4773	2.49431	20.997	DEK2_peak_11217	AT3G04380	0
chr1	19546265	19546786	523	19546555	188.55	27.6755	2.49408	24.9085	DEK2_peak_3934	AT1G52450	0
chr4	13478353	13478831	480	13478568	168	24.6467	2.49332	22.0872	DEK2_peak_18102	AT4G26750	0
chr2	11987479	11988335	858	11987904	163.53	24.2118	2.49287	21.6805	DEK2_peak_8484	AT2G28130	-341
chr1	8097472	8098718	1248	8098115	163.53	24.2118	2.49287	21.6805	DEK2_peak_2420	AT1G22882	-49
chr5	2987795	2988574	781	2988029	151.02	22.6813	2.49211	20.2528	DEK2_peak_20653	AT5G09640	0
chr2	18271596	18272184	590	18271962	233.23	33.9018	2.49181	30.7002	DEK2_peak_10360	AT2G44180	0
chr2	591584	592034	452	591773	147.44	21.9993	2.49109	19.6184	DEK2_peak_7108	AT2G02230	0
chr3	17719777	17720320	545	17720006	173.36	25.5978	2.49084	22.9755	DEK2_peak_14270	AT3G48000	0
chr4	12753980	12754767	789	12754240	175.15	25.9281	2.49075	23.2837	DEK2_peak_17874	AT4G24730	0
chr2	7755335	7758189	2856	7755541	153.7	22.7518	2.49073	20.3206	DEK2_peak_7523	AT2G17840	0
chr1	9342706	9343206	502	9342968	195.7	28.5123	2.48986	25.6896	DEK2_peak_2711	AT1G26940	0
chr5	23985514	23986199	687	23985928	230.55	33.3549	2.48978	30.1907	DEK2_peak_24691	AT5G59500	0
chr2	15272479	15273149	672	15272840	150.13	22.4736	2.48958	20.0625	DEK2_peak_9382	AT2G36400	0
chr3	5458581	5459399	820	5459080	138.51	20.7159	2.4894	18.4216	DEK2_peak_12544	AT3G16100	0
chr4	18270608	18271201	595	18270916	218.04	31.8274	2.48908	28.7677	DEK2_peak_19629	AT4G39240	0
chr1	9715009	9715456	449	9715262	183.19	26.9831	2.48903	24.2696	DEK2_peak_2794	AT1G27890	0
chr3	4955611	4956093	484	4955797	183.19	26.9831	2.48903	24.2696	DEK2_peak_12378	AT3G14750	0
chr2	9727959	9728886	929	9728170	138.51	20.7019	2.48846	18.4082	DEK2_peak_7975	AT2G22840	0
chr3	22197055	22197885	832	22197564	205.53	29.8965	2.48829	26.9766	DEK2_peak_15561	AT3G60110	0
chr5	25157347	25157911	566	25157616	170.68	25.0493	2.48809	22.4626	DEK2_peak_25062	AT5G62660	0
chr1	3647356	3648254	900	3647865	159.95	23.4627	2.48798	20.983	DEK2_peak_1090	AT1G10920	0
chr3	2551179	2551649	472	2551403	141.19	21.1906	2.48782	18.8646	DEK2_peak_11661	AT3G07980	0
chr1	9610829	9611266	439	9611103	149.23	22.2781	2.48777	19.8777	DEK2_peak_2777	AT1G27630	0
chr2	19446091	19446598	509	19446277	173.36	25.538	2.48764	22.9194	DEK2_peak_10806	AT2G47390	0
chr5	24705572	24707647	2077	24706256	193.02	28.3678	2.48741	25.5572	DEK2_peak_24914	AT5G61440	0
chr2	17135394	17135888	496	17135577	169.78	24.8697	2.48732	22.2931	DEK2_peak_9984	AT2G41090	0
chr5	3718461	3718966	507	3718776	151.91	22.3616	2.48719	19.9573	DEK2_peak_20879	AT5G11580	0
chr4	15294756	15295431	677	15295051	168	24.5357	2.48715	21.9819	DEK2_peak_18662	AT4G31560	0
chr2	9236222	9236706	486	9236481	158.17	23.5185	2.48699	21.0308	DEK2_peak_7850	AT2G21580	0
chr4	9637935	9638359	426	9638146	158.17	23.5185	2.48699	21.0308	DEK2_peak_17068	AT4G17150	0
chr3	6521411	6521918	509	6521614	148.34	22.0967	2.48681	19.7107	DEK2_peak_12864	AT3G18910	0
chr3	21577704	21578317	615	21577935	180.51	26.435	2.48641	23.7577	DEK2_peak_15413	AT3G58270	0
chr4	13959162	13959976	816	13959410	180.51	26.435	2.48641	23.7577	DEK2_peak_18239	AT4G28085	0
chr5	272039	272909	872	272464	180.51	26.435	2.48641	23.7577	DEK2_peak_19821	AT5G01732	0
chr5	20031841	20032909	1070	20032571	180.51	26.435	2.48641	23.7577	DEK2_peak_23611	AT5G49410	0
chr3	3498970	3499933	965	3499366	189.44	27.6815	2.48621	24.9143	DEK2_peak_11917	AT3G11165	0
chr1	1201976	1202491	517	1202200	141.19	21.1625	2.486	18.8382	DEK2_peak_394	AT1G04440	0
chr4	13860378	13861489	1113	13860764	202.85	29.3495	2.48595	26.4677	DEK2_peak_18208	AT4G27820	0
chr1	5946085	5946914	831	5946440	168	24.5014	2.48525	21.9496	DEK2_peak_1807	AT1G17360	0
chr3	8040261	8041691	1432	8040735	135.83	20.1522	2.48497	17.8932	DEK2_peak_13244	AT3G22750	-358
chr3	17791041	17791471	432	17791306	135.83	20.1522	2.48497	17.8932	DEK2_peak_14287	AT3G48180	-122
chr1	4544678	4545067	391	4544841	135.83	20.1522	2.48497	17.8932	DEK2_peak_1364	AT1G13270	0
chr1	11672141	11673055	916	11672868	135.83	20.1522	2.48497	17.8932	DEK2_peak_3231	AT1G32360	0
chr1	24298052	24298787	737	24298625	135.83	20.1522	2.48497	17.8932	DEK2_peak_4979	AT1G65420	0
chr2	7767693	7768122	431	7767854	135.83	20.1522	2.48497	17.8932	DEK2_peak_7526	AT2G17880	0
chr2	9075263	9076357	1096	9076056	135.83	20.1522	2.48497	17.8932	DEK2_peak_7813	AT2G21180	0
chr2	17728315	17728875	562	17728712	135.83	20.1522	2.48497	17.8932	DEK2_peak_10171	AT2G42580	0
chr5	15625328	15625860	534	15625532	135.83	20.1522	2.48497	17.8932	DEK2_peak_22597	AT5G39040	0
chr5	21800774	21801343	571	21801045	135.83	20.1522	2.48497	17.8932	DEK2_peak_24027	AT5G53700	0
chr5	24120127	24120502	377	24120322	135.83	20.1522	2.48497	17.8932	DEK2_peak_24740	AT5G59880	0
chr5	95247	96038	793	95731	190.34	27.82	2.4849	25.0457	DEK2_peak_19771	AT5G01230	0
chr4	17481926	17483059	1135	17482342	152.81	22.4871	2.48475	20.0753	DEK2_peak_19352	AT4G37100	-63
chr4	9791077	9791546	471	9791288	177.83	25.8874	2.48371	23.245	DEK2_peak_17115	AT4G17580	0
chr3	1620437	1621646	1211	1621392	152.81	22.4593	2.48306	20.049	DEK2_peak_11372	AT3G05590	0
chr1	6948757	6949165	410	6948963	165.32	24.3563	2.48233	21.8122	DEK2_peak_2090	AT1G20040	0
chr3	20243828	20244555	729	20244287	165.32	24.3563	2.48233	21.8122	DEK2_peak_14999	AT3G54680	0
chr4	11190963	11191346	385	11191103	165.32	24.3563	2.48233	21.8122	DEK2_peak_17451	AT4G20910	0
chr4	12331562	12332105	545	12331868	165.32	24.3563	2.48233	21.8122	DEK2_peak_17733	AT4G23660	0
chr2	16237047	16238266	1221	16238010	187.66	27.2727	2.48232	24.5331	DEK2_peak_9704	AT2G38870	0
chr4	1379402	1379854	454	1379602	187.66	27.2727	2.48232	24.5331	DEK2_peak_16273	AT4G03110	0
chr3	16229734	16230256	524	16230084	144.76	21.3438	2.48108	19.0098	DEK2_peak_14006	AT3G44680	0
chr2	12484477	12485231	756	12484752	175.15	25.7423	2.48093	23.108	DEK2_peak_8630	AT2G29065	0
chr2	11070373	11070963	592	11070711	175.15	25.7423	2.48093	23.108	DEK2_peak_8260	AT2G25964	324
chr4	12327380	12328054	676	12327631	185.87	26.9037	2.48035	24.1951	DEK2_peak_17732	AT4G23650	0
chr5	14816332	14816821	491	14816569	162.64	23.8081	2.47933	21.3044	DEK2_peak_22505	AT5G37370	0
chr4	14016531	14017490	961	14016878	164.42	24.1317	2.47899	21.6053	DEK2_peak_18265	AT4G28310	0
chr2	10855645	10856151	508	10855925	140.3	20.8878	2.47887	18.5829	DEK2_peak_8223	AT2G25510	-221
chr1	20349779	20350302	525	20350081	140.3	20.8878	2.47887	18.5829	DEK2_peak_4140	AT1G54490	0
chr2	9559770	9560431	663	9560004	172.47	25.1945	2.47807	22.6	DEK2_peak_7927	AT2G22496	-330
chr1	20240495	20241458	965	20241221	172.47	25.1945	2.47807	22.6	DEK2_peak_4114	AT1G54210	0
chr5	23485222	23485592	372	23485416	172.47	25.1945	2.47807	22.6	DEK2_peak_24542	AT5G58020	0
chr4	16444626	16445570	946	16444975	168	24.3699	2.47796	21.8252	DEK2_peak_18995	AT4G34400	0
chr1	28983515	28984055	542	28983831	209.1	30.3249	2.47792	27.3754	DEK2_peak_6510	AT1G77140	0
chr3	2022089	2022658	571	2022391	171.57	25.0236	2.47773	22.4387	DEK2_peak_11502	AT3G06530	0
chr2	167085	167578	495	167310	155.49	22.8637	2.47762	20.4261	DEK2_peak_7008	AT2G01350	0
chr3	4103525	4104201	678	4103715	150.13	22.2758	2.47746	19.8756	DEK2_peak_12095	AT3G12900	-375
chr1	30067315	30067728	415	30067495	150.13	22.2758	2.47746	19.8756	DEK2_peak_6874	AT1G79930	0
chr1	29026817	29027897	1082	29027580	172.47	25.1767	2.47712	22.5831	DEK2_peak_6526	AT1G77260	0
chr3	23165095	23165562	469	23165298	144.76	21.2745	2.47665	18.9443	DEK2_peak_15864	AT3G62630	0
chr1	11565226	11565730	506	11565472	151.02	22.4172	2.47604	20.0088	DEK2_peak_3201	AT1G32150	0
chr1	10963021	10963920	901	10963567	135.83	20.0186	2.47589	17.7713	DEK2_peak_3093	AT1G30830	0
chr1	3756925	3757504	581	3757232	147.44	21.7483	2.47539	19.3872	DEK2_peak_1119	AT1G11210	0
chr3	18892328	18893236	910	18892574	151.91	22.154	2.47451	19.7647	DEK2_peak_14572	AT3G50820	0
chr1	21255708	21256368	662	21256105	156.38	22.9753	2.47449	20.5321	DEK2_peak_4337	AT1G56700	0
chr2	9925934	9927145	1213	9926380	163.53	23.8817	2.47416	21.3746	DEK2_peak_8030	AT2G23321	0
chr3	22038566	22039009	445	22038739	179.61	26.0331	2.47416	23.3825	DEK2_peak_15514	AT3G59660	0
chr5	25322762	25323268	508	25322952	159.06	23.4489	2.47336	20.9698	DEK2_peak_25116	AT5G63130	0
chr2	18502382	18503273	893	18502608	154.59	22.6274	2.47334	20.2078	DEK2_peak_10454	AT2G44860	0
chr4	18274926	18275470	546	18275236	189.44	27.4183	2.47329	24.671	DEK2_peak_19631	AT4G39260	0
chr3	22420914	22421587	675	22421331	157.27	23.1147	2.47303	20.6536	DEK2_peak_15645	AT3G60660	0
chr3	8530875	8531999	1126	8531210	199.27	28.803	2.47251	25.9638	DEK2_peak_13387	AT3G23690	0
chr1	737852	738727	877	738098	167.1	24.5014	2.47211	21.9496	DEK2_peak_244	AT1G03080	0
chr1	5279749	5280509	762	5279928	167.1	24.5014	2.47211	21.9496	DEK2_peak_1627	AT1G15350	0
chr3	1613917	1614399	484	1614219	167.1	24.5014	2.47211	21.9496	DEK2_peak_11369	AT3G05560	0
chr4	18028457	18029187	732	18028675	209.1	30.1871	2.4718	27.2512	DEK2_peak_19552	AT4G38552	0
chr1	17484068	17484752	686	17484390	176.93	25.4866	2.47129	22.8707	DEK2_peak_3557	AT1G47578	0
chr2	17674954	17675455	503	17675184	176.93	25.4866	2.47129	22.8707	DEK2_peak_10158	AT2G42450	0
chr3	2510486	2510950	466	2510661	151.91	22.0989	2.47115	19.7129	DEK2_peak_11652	AT3G07870	0
chr2	10479264	10479624	362	10479434	144.76	21.1791	2.47057	18.8537	DEK2_peak_8151	AT2G24640	0
chr2	18810811	18812203	1394	18811043	144.76	21.1791	2.47057	18.8537	DEK2_peak_10566	AT2G45660	0
chr2	12847077	12847774	699	12847406	186.76	26.8721	2.47056	24.1648	DEK2_peak_8735	AT2G30100	-54
chr5	970534	971206	674	970797	196.59	28.2569	2.46991	25.4534	DEK2_peak_20067	AT5G03705	0
chr4	16021870	16022413	545	16022103	154.59	22.567	2.46973	20.1503	DEK2_peak_18874	AT4G33220	-26
chr3	20379885	20381621	1738	20380250	154.59	22.567	2.46973	20.1503	DEK2_peak_15039	AT3G55000	0
chr4	381288	381893	607	381602	165.32	24.1189	2.46907	21.593	DEK2_peak_16040	AT4G00893	0
chr4	2375397	2375841	446	2375658	149.23	21.9718	2.46888	19.5937	DEK2_peak_16334	AT4G04690	-262
chr3	5859554	5860677	1125	5859755	134.93	19.7495	2.46874	17.517	DEK2_peak_12679	AT3G17180	-397
chr1	26676321	26676959	640	26676627	134.93	19.7495	2.46874	17.517	DEK2_peak_5693	AT1G70740	-331
chr2	11519011	11519680	671	11519378	134.93	19.7495	2.46874	17.517	DEK2_peak_8368	AT2G26980	-277
chr2	15137845	15138820	977	15138295	134.93	19.7495	2.46874	17.517	DEK2_peak_9338	AT2G36053	-176
chr3	1753109	1753393	286	1753276	134.93	19.7495	2.46874	17.517	DEK2_peak_11406	AT3G05870	-74
chr1	7396695	7397283	590	7397003	134.93	19.7495	2.46874	17.517	DEK2_peak_2210	AT1G21120	0
chr1	8480115	8480739	626	8480425	134.93	19.7495	2.46874	17.517	DEK2_peak_2508	AT1G23960	0
chr1	19762181	19762685	506	19762478	134.93	19.7495	2.46874	17.517	DEK2_peak_3981	AT1G53035	0
chr2	11753698	11754160	464	11753978	134.93	19.7495	2.46874	17.517	DEK2_peak_8416	AT2G27500	0
chr2	15091827	15092608	783	15092225	134.93	19.7495	2.46874	17.517	DEK2_peak_9320	AT2G35940	0
chr4	11722785	11723794	1011	11723623	134.93	19.7495	2.46874	17.517	DEK2_peak_17573	AT4G22130	0
chr4	12527006	12527824	820	12527187	134.93	19.7495	2.46874	17.517	DEK2_peak_17822	AT4G24130	0
chr4	16552635	16553610	977	16553369	134.93	19.7495	2.46874	17.517	DEK2_peak_19030	AT4G34680	0
chr5	3343505	3344280	777	3344071	134.93	19.7495	2.46874	17.517	DEK2_peak_20764	AT5G10572	0
chr3	5754942	5756070	1130	5755914	139.4	20.563	2.46834	18.2767	DEK2_peak_12649	AT3G16857	0
chr4	7857699	7858230	533	7858040	142.98	20.8162	2.46831	18.5163	DEK2_peak_16712	AT4G13500	0
chr4	14711541	14712024	485	14711811	184.08	26.7258	2.46776	24.0268	DEK2_peak_18461	AT4G30090	0
chr5	20100001	20100728	729	20100528	136.72	20.0615	2.46768	17.8121	DEK2_peak_23639	AT5G49530	0
chr1	28865125	28865581	458	28865384	146.55	21.4567	2.4674	19.1112	DEK2_peak_6458	AT1G76880	0
chr3	9897850	9898266	418	9898081	146.55	21.4567	2.4674	19.1112	DEK2_peak_13706	AT3G26850	0
chr5	16165992	16166526	536	16166269	193.91	27.7113	2.46724	24.9423	DEK2_peak_22681	AT5G40395	0
chr5	6789518	6789921	405	6789719	137.61	20.2148	2.46698	17.9523	DEK2_peak_21742	AT5G20100	-135
chr4	10102004	10102412	410	10102239	142.08	21.0331	2.46694	18.7154	DEK2_peak_17202	AT4G18270	-107
chr4	12593533	12594948	1417	12594203	158.17	23.1711	2.46676	20.707	DEK2_peak_17837	AT4G24290	0
chr4	16265800	16266108	310	16265895	152.81	22.1834	2.46634	19.7927	DEK2_peak_18931	AT4G33940	0
chr4	16135637	16137290	1655	16136445	151.91	22.0198	2.46633	19.6372	DEK2_peak_18903	AT4G33565	0
chr5	875179	875795	618	875519	151.91	22.0198	2.46633	19.6372	DEK2_peak_20033	AT5G03495	0
chr1	22663720	22664797	1079	22664205	171.57	24.7936	2.46531	22.2202	DEK2_peak_4577	AT1G61420	0
chr3	21079621	21080487	868	21080098	171.57	24.7936	2.46531	22.2202	DEK2_peak_15252	AT3G56950	0
chr4	14213550	14214039	491	14213809	171.57	24.7936	2.46531	22.2202	DEK2_peak_18324	AT4G28770	0
chr2	11684881	11685282	403	11685081	137.61	20.1873	2.46514	17.926	DEK2_peak_8401	AT2G27310	0
chr3	20855407	20855991	586	20855669	181.4	26.1794	2.46488	23.5158	DEK2_peak_15179	AT3G56210	0
chr4	14043143	14043706	565	14043369	181.4	26.1794	2.46488	23.5158	DEK2_peak_18276	AT4G28390	0
chr3	2160387	2161114	729	2160733	191.23	27.5646	2.4645	24.8038	DEK2_peak_11548	AT3G06850	0
chr3	4594874	4596054	1182	4595779	191.23	27.5646	2.4645	24.8038	DEK2_peak_12254	AT3G13920	0
chr5	983945	984620	677	984363	174.25	25.2486	2.46349	22.6464	DEK2_peak_20073	AT5G03745	0
chr4	16406065	16407201	1138	16406349	169.78	24.4291	2.46321	21.8818	DEK2_peak_18987	AT4G34270	0
chr5	8902963	8903613	652	8903326	148.34	21.7081	2.4627	19.3484	DEK2_peak_22245	AT5G25580	0
chr1	7886085	7886658	575	7886369	159.06	23.2606	2.46248	20.7913	DEK2_peak_2348	AT1G22330	0
chr4	15140168	15140883	717	15140578	159.06	23.2606	2.46248	20.7913	DEK2_peak_18619	AT4G31136	0
chr3	611058	611582	526	611368	161.74	23.342	2.46206	20.869	DEK2_peak_11062	AT3G02820	0
chr4	12626098	12626769	673	12626533	178.72	25.6336	2.46192	23.01	DEK2_peak_17847	AT4G24420	-327
chr5	10369145	10369569	426	10369353	178.72	25.6336	2.46192	23.01	DEK2_peak_22413	AT5G28442	0
chr2	17525902	17527214	1314	17526207	188.55	27.0189	2.46169	24.2937	DEK2_peak_10109	AT2G41980	0
chr5	472383	473223	842	472831	188.55	27.0189	2.46169	24.2937	DEK2_peak_19893	AT5G02290	0
chr1	21014000	21014654	656	21014370	135.83	19.7982	2.46093	17.5633	DEK2_peak_4286	AT1G56145	0
chr2	11295657	11296635	980	11296273	134.93	19.6312	2.46065	17.4148	DEK2_peak_8326	AT2G26560	0
chr5	894070	894761	693	894361	140.3	20.6059	2.46044	18.318	DEK2_peak_20043	AT5G03545	0
chr3	22814894	22815400	508	22815225	153.7	22.2407	2.45996	19.8426	DEK2_peak_15750	AT3G61650	0
chr1	11536120	11536529	411	11536358	153.7	22.227	2.45914	19.8292	DEK2_peak_3190	AT1G32070	0
chr3	4436743	4437596	855	4437008	156.38	22.7136	2.45907	20.2839	DEK2_peak_12202	AT3G13590	0
chr3	19643064	19643711	649	19643536	156.38	22.7136	2.45907	20.2839	DEK2_peak_14829	AT3G52970	0
chr1	2177322	2178489	1169	2177787	185.87	26.4738	2.45881	23.7941	DEK2_peak_668	AT1G07100	0
chr1	29300650	29301143	495	29300983	185.87	26.4738	2.45881	23.7941	DEK2_peak_6619	AT1G77930	0
chr3	22873648	22874149	503	22873894	185.87	26.4738	2.45881	23.7941	DEK2_peak_15768	AT3G61790	0
chr5	26425129	26425879	752	26425658	205.53	29.2429	2.45867	26.3729	DEK2_peak_25512	AT5G66080	0
chr2	18137414	18138375	963	18137678	173.36	24.9862	2.45818	22.4031	DEK2_peak_10313	AT2G43780	0
chr1	4498438	4499098	662	4498894	135.83	19.7435	2.45721	17.517	DEK2_peak_1341	AT1G13190	0
chr3	19068626	19069582	958	19069255	187.66	26.7443	2.45614	24.0449	DEK2_peak_14630	AT3G51370	0
chr4	18235885	18236560	677	18236224	222.51	31.4659	2.45612	28.4321	DEK2_peak_19619	AT4G39150	0
chr2	9590338	9591338	1002	9591144	193.02	27.7113	2.45592	24.9423	DEK2_peak_7939	AT2G22570	0
chr5	1904911	1905433	524	1905219	183.19	26.3263	2.45585	23.6549	DEK2_peak_20344	AT5G06260	0
chr5	18566389	18567100	713	18566588	173.36	24.9407	2.45576	22.3595	DEK2_peak_23244	AT5G45775	0
chr1	3993348	3994262	916	3993655	158.17	22.9787	2.45557	20.5353	DEK2_peak_1190	AT1G11820	0
chr1	23522311	23522886	577	23522586	153.7	22.1672	2.45555	19.7771	DEK2_peak_4783	AT1G63430	0
chr4	12298744	12300015	1273	12299186	141.19	20.6904	2.45535	18.3972	DEK2_peak_17727	AT4G23570	0
chr5	22416057	22416849	794	22416545	200.17	28.5508	2.45325	25.7256	DEK2_peak_24217	AT5G55260	0
chr3	2983388	2983958	572	2983745	212.68	30.018	2.45324	27.0913	DEK2_peak_11776	AT3G09720	0
chr3	5049372	5050374	1004	5049715	173.36	24.8907	2.4531	22.3128	DEK2_peak_12404	AT3G15000	0
chr4	16535877	16536893	1018	16536147	170.68	24.3953	2.45254	21.8493	DEK2_peak_19024	AT4G34620	0
chr5	19407120	19407780	662	19407519	170.68	24.3953	2.45254	21.8493	DEK2_peak_23464	AT5G47930	0
chr1	24315052	24315563	513	24315202	134.04	19.7495	2.45251	17.517	DEK2_peak_4981	AT1G65450	-251
chr1	7658866	7660194	1330	7659348	134.04	19.7495	2.45251	17.517	DEK2_peak_2283	AT1G21810	-232
chr4	375428	375846	420	375597	134.04	19.7495	2.45251	17.517	DEK2_peak_16039	AT4G00890	-78
chr1	4892031	4892577	548	4892285	134.04	19.7495	2.45251	17.517	DEK2_peak_1478	AT1G14330	0
chr1	7734053	7734908	857	7734665	134.04	19.7495	2.45251	17.517	DEK2_peak_2309	AT1G21980	0
chr1	21237597	21238091	496	21237773	134.04	19.7495	2.45251	17.517	DEK2_peak_4332	AT1G56660	0
chr2	389652	390611	961	390413	134.04	19.7495	2.45251	17.517	DEK2_peak_7070	AT2G01870	0
chr2	7693037	7693848	813	7693574	134.04	19.7495	2.45251	17.517	DEK2_peak_7514	AT2G17710	0
chr2	12770278	12770841	565	12770608	134.04	19.7495	2.45251	17.517	DEK2_peak_8703	AT2G29960	0
chr3	951448	951848	402	951606	134.04	19.7495	2.45251	17.517	DEK2_peak_11154	AT3G03773	0
chr3	15891695	15892141	448	15891897	134.04	19.7495	2.45251	17.517	DEK2_peak_13974	AT3G44160	0
chr5	21433485	21434133	650	21433650	134.04	19.7495	2.45251	17.517	DEK2_peak_23915	AT5G52880	0
chr5	21722967	21723525	560	21723238	134.04	19.7495	2.45251	17.517	DEK2_peak_23996	AT5G53487	0
chr5	22046182	22047203	1023	22046994	134.04	19.7495	2.45251	17.517	DEK2_peak_24098	AT5G54280	0
chr4	18514202	18514595	395	18514407	141.19	20.6355	2.45179	18.3456	DEK2_peak_19709	AT4G39910	0
chr1	3377297	3377909	614	3377676	142.98	20.5568	2.45154	18.2718	DEK2_peak_1014	AT1G10300	-233
chr1	29436234	29436839	607	29436559	138.51	20.1348	2.45082	17.8824	DEK2_peak_6675	AT1G78240	0
chr1	2086883	2087452	571	2087084	207.32	29.3906	2.45077	26.5073	DEK2_peak_633	AT1G06790	0
chr3	9656403	9656929	528	9656607	159.95	22.8185	2.45059	20.3837	DEK2_peak_13641	AT3G26360	0
chr4	17806362	17807152	792	17806681	140.3	20.4549	2.45058	18.1791	DEK2_peak_19493	AT4G37870	0
chr4	14290708	14291341	635	14291022	157.27	22.73	2.45052	20.2997	DEK2_peak_18342	AT4G28990	0
chr2	15027828	15028725	899	15028327	159.06	23.0496	2.4503	20.6001	DEK2_peak_9294	AT2G35743	0
chr2	18420368	18421026	660	18420649	179.61	25.5632	2.4499	22.9439	DEK2_peak_10418	AT2G44650	84
chr1	29449521	29450786	1267	29450608	184.08	26.3676	2.44979	23.6946	DEK2_peak_6684	AT1G78265	0
chr1	10762098	10762847	751	10762617	147.44	21.3358	2.44966	19.0021	DEK2_peak_3044	AT1G30450	0
chr4	14140849	14141513	666	14141028	187.66	26.6089	2.44945	23.9166	DEK2_peak_18303	AT4G28630	0
chr5	19603960	19604561	603	19604257	153.7	22.0636	2.44933	19.6791	DEK2_peak_23503	AT5G48375	-77
chr5	24983743	24984597	856	24983967	152.81	21.8971	2.44902	19.5224	DEK2_peak_24990	AT5G62190	0
chr4	18262988	18263775	789	18263522	160.85	22.9443	2.44854	20.5028	DEK2_peak_19626	AT4G39220	0
chr5	210011	211067	1058	210340	214.46	30.2304	2.44846	27.2917	DEK2_peak_19804	AT5G01542	-190
chr3	21123675	21124156	483	21123973	155.49	22.3695	2.44832	19.9647	DEK2_peak_15272	AT3G57070	0
chr2	11926245	11926719	476	11926428	148.34	21.4733	2.44816	19.1267	DEK2_peak_8464	AT2G28000	0
chr4	17011250	17011868	620	17011670	150.13	21.7951	2.44808	19.426	DEK2_peak_19187	AT4G35910	0
chr5	18457551	18458063	514	18457816	140.3	20.4139	2.4479	18.1399	DEK2_peak_23228	AT5G45530	-274
chr5	25397897	25398529	634	25398176	144.76	20.8222	2.44783	18.5219	DEK2_peak_25139	AT5G63410	0
chr3	9532362	9532856	496	9532595	188.55	26.7345	2.4477	24.0354	DEK2_peak_13612	AT3G26090	0
chr3	20515176	20515714	540	20515478	241.27	33.8359	2.4472	30.6382	DEK2_peak_15069	AT3G55330	0
chr4	12883694	12884629	937	12884013	175.15	25.1012	2.44715	22.5119	DEK2_peak_17917	AT4G25090	0
chr3	16020093	16020573	482	16020312	175.15	25.0883	2.44647	22.4993	DEK2_peak_13987	AT3G44340	0
chr4	14601007	14601462	457	14601183	175.15	25.0883	2.44647	22.4993	DEK2_peak_18428	AT4G29840	0
chr4	17242608	17243755	1149	17243554	175.15	25.0883	2.44647	22.4993	DEK2_peak_19252	AT4G36540	0
chr5	6578183	6578797	616	6578413	150.13	21.7678	2.44642	19.4052	DEK2_peak_21688	AT5G19490	0
chr2	19038289	19039395	1108	19038615	155.49	22.3288	2.44591	19.9258	DEK2_peak_10649	AT2G46380	0
chr3	2976096	2976602	508	2976270	164.42	23.5422	2.44589	21.053	DEK2_peak_11773	AT3G09700	0
chr1	1226234	1226786	554	1226582	165.32	23.7022	2.44583	21.2036	DEK2_peak_400	AT1G04510	0
chr2	13136790	13137593	805	13137206	165.32	23.7022	2.44583	21.2036	DEK2_peak_8807	AT2G30840	0
chr3	9989283	9989750	469	9989450	165.32	23.7022	2.44583	21.2036	DEK2_peak_13723	AT3G27090	0
chr3	22141641	22143160	1521	22142654	143.87	20.6285	2.44576	18.339	DEK2_peak_15543	AT3G59940	0
chr2	15988554	15989541	989	15988926	201.95	28.3034	2.44523	25.4969	DEK2_peak_9622	AT2G38160	0
chr1	4947429	4948397	970	4947616	155.49	22.3153	2.44511	19.9127	DEK2_peak_1503	AT1G14450	0
chr2	13673183	13673750	569	13673376	155.49	22.3153	2.44511	19.9127	DEK2_peak_8946	AT2G32180	0
chr2	17002375	17002874	501	17002621	155.49	22.3153	2.44511	19.9127	DEK2_peak_9953	AT2G40750	0
chr1	28115200	28115995	797	28115670	144.76	20.768	2.44438	18.4698	DEK2_peak_6176	AT1G74830	0
chr3	4548519	4549455	938	4549097	145.66	20.9275	2.44429	18.6205	DEK2_peak_12245	AT3G13820	-161
chr2	18610283	18611069	788	18610801	182.29	25.9292	2.44393	23.2844	DEK2_peak_10490	AT2G45140	0
chr4	13664780	13666284	1506	13665972	151.91	21.6495	2.44378	19.2934	DEK2_peak_18147	AT4G27290	0
chr5	7941394	7941864	472	7941641	151.91	21.6495	2.44378	19.2934	DEK2_peak_22023	AT5G23550	0
chr3	3480448	3481316	870	3480890	146.55	21.074	2.44338	18.7549	DEK2_peak_11915	AT3G11120	0
chr3	812162	812661	501	812427	135.83	19.5387	2.44335	17.3272	DEK2_peak_11122	AT3G03420	0
chr3	22846852	22847278	428	22847058	156.38	22.4411	2.44304	20.0315	DEK2_peak_15762	AT3G61723	0
chr5	24985570	24986068	500	24985812	160.85	22.8363	2.44233	20.4002	DEK2_peak_24991	AT5G62200	0
chr3	6792699	6793400	703	6793091	162.64	23.1573	2.44232	20.6939	DEK2_peak_12941	AT3G19553	0
chr3	4630454	4630925	473	4630678	151.91	21.6225	2.44214	19.2679	DEK2_peak_12263	AT3G13990	0
chr1	28098261	28099027	768	28098612	173.36	24.6738	2.44155	22.1124	DEK2_peak_6173	AT1G74790	0
chr5	17267669	17268137	470	17267901	179.61	25.3852	2.44073	22.7754	DEK2_peak_22944	AT5G43050	0
chr1	2147897	2148449	554	2148210	142.98	20.3823	2.44028	18.1097	DEK2_peak_655	AT1G06990	0
chr1	28733074	28734408	1336	28734177	142.98	20.3823	2.44028	18.1097	DEK2_peak_6410	AT1G76580	0
chr5	21383592	21384301	711	21383872	142.98	20.3823	2.44028	18.1097	DEK2_peak_23897	AT5G52750	0
chr2	17867449	17868494	1047	17867638	171.57	24.3279	2.44021	21.7913	DEK2_peak_10212	AT2G42955	0
chr5	14978521	14978960	441	14978706	136.72	19.6519	2.44013	17.4345	DEK2_peak_22528	AT5G37710	-199
chr3	1603158	1603610	454	1603451	144.76	20.7004	2.44009	18.4068	DEK2_peak_11366	AT3G05530	0
chr3	22150385	22150916	533	22150723	169.78	23.9995	2.43978	21.4805	DEK2_peak_15546	AT3G59970	-279
chr1	27865413	27866352	941	27866023	196.59	27.6114	2.43941	24.8486	DEK2_peak_6096	AT1G74100	0
chr1	30027212	30028159	949	30027713	196.59	27.6114	2.43941	24.8486	DEK2_peak_6863	AT1G79820	0
chr3	3034348	3034870	524	3034590	150.13	21.6454	2.43896	19.2894	DEK2_peak_11793	AT3G09900	0
chr2	14629156	14629695	541	14629355	159.95	22.6131	2.43871	20.1941	DEK2_peak_9192	AT2G34680	-27
chr2	14725413	14725858	447	14725618	159.95	22.6131	2.43871	20.1941	DEK2_peak_9211	AT2G34900	0
chr1	2627556	2628135	581	2627868	150.13	21.6215	2.4375	19.2668	DEK2_peak_797	AT1G08320	0
chr3	20628992	20629379	389	20629129	150.13	21.6215	2.4375	19.2668	DEK2_peak_15108	AT3G55610	0
chr3	22649594	22650301	709	22649967	176.93	24.8418	2.43744	22.266	DEK2_peak_15697	AT3G61185	-389
chr1	780100	780631	533	780365	230.55	32.0598	2.43736	28.9879	DEK2_peak_259	AT1G03200	0
chr5	2687217	2688314	1099	2687926	151.02	21.7712	2.43686	19.4082	DEK2_peak_20572	AT5G08350	0
chr3	7002435	7003035	602	7002671	176.93	24.8227	2.43644	22.2484	DEK2_peak_12991	AT3G20050	-31
chr3	3705497	3706125	630	3705814	180.51	25.4597	2.43634	22.8454	DEK2_peak_11987	AT3G11710	0
chr3	7668733	7669269	538	7669007	133.15	19.35	2.43628	17.1489	DEK2_peak_13163	AT3G21755	-168
chr1	4928485	4929180	697	4928797	167.1	23.8505	2.43628	21.3443	DEK2_peak_1497	AT1G14400	0
chr1	17723071	17723580	511	17723318	133.15	19.35	2.43628	17.1489	DEK2_peak_3580	AT1G48050	0
chr2	7697132	7697609	479	7697321	133.15	19.35	2.43628	17.1489	DEK2_peak_7515	AT2G17720	0
chr2	8559504	8559888	386	8559685	133.15	19.35	2.43628	17.1489	DEK2_peak_7705	AT2G19830	0
chr2	14842062	14842518	458	14842322	133.15	19.35	2.43628	17.1489	DEK2_peak_9240	AT2G35230	0
chr3	1448131	1448790	661	1448483	133.15	19.35	2.43628	17.1489	DEK2_peak_11319	AT3G05155	0
chr3	9634345	9635134	791	9634703	133.15	19.35	2.43628	17.1489	DEK2_peak_13636	AT3G26290	0
chr4	14627369	14628122	755	14627738	133.15	19.35	2.43628	17.1489	DEK2_peak_18438	AT4G29905	0
chr4	14818758	14819830	1074	14819468	133.15	19.35	2.43628	17.1489	DEK2_peak_18500	AT4G30260	0
chr4	15874759	15875532	775	15875391	133.15	19.35	2.43628	17.1489	DEK2_peak_18827	AT4G32890	0
chr5	2120173	2120800	629	2120506	133.15	19.35	2.43628	17.1489	DEK2_peak_20423	AT5G06839	0
chr5	22133573	22133989	418	22133736	133.15	19.35	2.43628	17.1489	DEK2_peak_24126	AT5G54510	0
chr2	19418073	19418824	753	19418315	191.23	26.9767	2.43608	24.2639	DEK2_peak_10801	AT2G47300	0
chr3	2413238	2413723	487	2413532	212.68	29.6151	2.43562	26.7181	DEK2_peak_11622	AT3G07560	0
chr3	22147572	22148333	763	22148021	162.64	23.0342	2.43534	20.5876	DEK2_peak_15545	AT3G59950	0
chr3	9271127	9271759	634	9271430	184.08	26.0778	2.43529	23.4246	DEK2_peak_13536	AT3G25520	0
chr3	3933465	3934288	825	3934054	177.83	24.9484	2.43467	22.3669	DEK2_peak_12044	AT3G12360	0
chr2	10427388	10428273	887	10427606	181.4	25.5854	2.43461	22.9645	DEK2_peak_8133	AT2G24545	0
chr4	12744984	12746025	1043	12745514	174.25	24.6924	2.43406	22.1297	DEK2_peak_17873	AT4G24700	0
chr5	3798593	3799685	1094	3799422	174.25	24.6924	2.43406	22.1297	DEK2_peak_20903	AT5G11790	0
chr5	22935928	22936623	697	22936134	165.32	23.479	2.43341	20.9986	DEK2_peak_24353	AT5G56670	0
chr5	5265297	5265919	624	5265504	135.83	19.3909	2.43335	17.1872	DEK2_peak_21337	AT5G16120	0
chr3	21010543	21011190	649	21011009	164.42	23.3064	2.43269	20.8348	DEK2_peak_15225	AT3G56720	0
chr5	18398301	18399042	743	18398638	159.06	22.7374	2.43232	20.307	DEK2_peak_23209	AT5G45400	0
chr1	17939784	17940163	381	17939973	171.57	24.149	2.43059	21.6216	DEK2_peak_3623	AT1G48520	0
chr3	18817036	18818077	1043	18817822	171.57	24.149	2.43059	21.6216	DEK2_peak_14541	AT3G50660	0
chr5	380972	381558	588	381218	150.13	21.4966	2.4299	19.1492	DEK2_peak_19859	AT5G02000	-377
chr1	8839454	8840145	693	8839720	205.53	28.6023	2.42975	25.7748	DEK2_peak_2568	AT1G25220	0
chr5	16450505	16451421	918	16451169	147.44	21.011	2.42945	18.695	DEK2_peak_22761	AT5G41110	-49
chr2	19531324	19531953	631	19531844	176.93	24.6892	2.42945	22.1271	DEK2_peak_10837	AT2G47620	0
chr5	6539642	6540062	422	6539921	144.76	20.532	2.42939	18.2517	DEK2_peak_21680	AT5G19400	0
chr1	28638279	28639938	1661	28639503	140.3	20.129	2.42934	17.8767	DEK2_peak_6380	AT1G76350	0
chr5	3616809	3617273	466	3617010	136.72	19.4902	2.42929	17.2819	DEK2_peak_20849	AT5G11325	0
chr1	1450718	1451427	711	1450893	148.34	21.1639	2.42905	18.8395	DEK2_peak_461	AT1G05055	0
chr1	28348578	28349258	682	28348805	161.74	22.7629	2.42898	20.331	DEK2_peak_6264	AT1G75510	0
chr5	8796866	8797500	636	8797168	161.74	22.7629	2.42898	20.331	DEK2_peak_22230	AT5G25350	0
chr1	28759094	28759655	563	28759433	178.72	24.9916	2.42865	22.4082	DEK2_peak_6424	AT1G76630	-44
chr3	19280942	19282932	1992	19281431	178.72	24.9916	2.42865	22.4082	DEK2_peak_14699	AT3G51950	0
chr1	23943034	23943585	553	23943333	195.7	27.2185	2.42838	24.4827	DEK2_peak_4905	AT1G64450	-188
chr3	968052	968972	922	968448	212.68	29.4439	2.42815	26.5584	DEK2_peak_11157	AT3G03800	-135
chr5	26060803	26061418	617	26061029	184.98	25.6958	2.42788	23.0645	DEK2_peak_25378	AT5G65220	0
chr1	26980779	26981401	624	26980980	134.93	19.1434	2.42739	16.9586	DEK2_peak_5792	AT1G71710	0
chr5	15409386	15409859	475	15409605	151.91	21.3761	2.42718	19.0373	DEK2_peak_22567	AT5G38480	0
chr1	20282893	20283636	745	20283332	168.89	23.6062	2.42701	21.1137	DEK2_peak_4129	AT1G54340	0
chr2	18586635	18587617	984	18586792	168.89	23.6062	2.42701	21.1137	DEK2_peak_10479	AT2G45060	0
chr4	2525238	2525764	528	2525500	168.89	23.6062	2.42701	21.1137	DEK2_peak_16350	AT4G04955	0
chr5	1277872	1278455	585	1278129	142.08	20.408	2.42678	18.1341	DEK2_peak_20148	AT5G04480	0
chr2	2588196	2589054	860	2588534	185.87	25.8216	2.42624	23.1838	DEK2_peak_7290	AT2G06520	0
chr3	8173906	8174460	556	8174207	182.29	25.5774	2.42614	22.9575	DEK2_peak_13288	AT3G23010	-398
chr3	716717	717343	628	717124	145.66	20.6383	2.42605	18.3483	DEK2_peak_11097	AT3G03120	0
chr1	18679962	18680401	441	18680168	138.51	19.7558	2.42577	17.5226	DEK2_peak_3775	AT1G50420	0
chr1	4576582	4577103	523	4576791	193.02	27.0686	2.42523	24.3411	DEK2_peak_1376	AT1G13350	0
chr5	2813169	2814266	1099	2813900	193.02	27.0686	2.42523	24.3411	DEK2_peak_20603	AT5G08650	0
chr4	9821497	9822112	617	9821782	176.04	24.8418	2.4252	22.266	DEK2_peak_17122	AT4G17620	0
chr5	22251784	22252305	523	22252084	176.04	24.8418	2.4252	22.266	DEK2_peak_24159	AT5G54780	0
chr1	23390600	23391334	736	23390951	159.06	22.6131	2.42517	20.1941	DEK2_peak_4749	AT1G63080	0
chr3	8962907	8964231	1326	8963705	158.17	22.4501	2.42493	20.04	DEK2_peak_13479	AT3G24560	0
chr5	18524501	18525091	592	18524844	146.55	20.7777	2.42483	18.4793	DEK2_peak_23235	AT5G45660	0
chr3	3360487	3361157	672	3360831	172.47	24.1858	2.42405	21.6569	DEK2_peak_11872	AT3G10730	0
chr4	13728663	13729949	1288	13729745	151.02	21.5552	2.42381	19.204	DEK2_peak_18170	AT4G27450	0
chr1	6488616	6489184	570	6488749	165.32	23.3047	2.42373	20.8335	DEK2_peak_1947	AT1G18820	0
chr5	18406440	18407410	972	18406822	155.49	21.9519	2.42363	19.5745	DEK2_peak_23211	AT5G45420	0
chr3	3931288	3931694	408	3931563	154.59	21.7859	2.42319	19.4221	DEK2_peak_12043	AT3G12350	0
chr5	26534169	26534735	568	26534520	154.59	21.7859	2.42319	19.4221	DEK2_peak_25551	AT5G66450	0
chr5	24628844	24629669	827	24629228	150.13	21.3755	2.42254	19.0373	DEK2_peak_24883	AT5G61240	0
chr3	19841007	19841673	668	19841319	146.55	20.7376	2.42232	18.4424	DEK2_peak_14887	AT3G53520	0
chr1	8241940	8242653	715	8242453	190.34	26.5265	2.42199	23.8444	DEK2_peak_2465	AT1G23220	0
chr2	10451665	10452559	896	10452306	133.15	19.1387	2.42186	16.9543	DEK2_peak_8144	AT2G24592	246
chr1	1789637	1790339	704	1790049	158.17	22.3966	2.42183	19.9894	DEK2_peak_554	AT1G05910	0
chr1	4187895	4188775	882	4188167	156.38	22.0779	2.42172	19.6927	DEK2_peak_1250	AT1G12310	0
chr3	19836859	19837462	605	19837204	162.64	22.7936	2.42172	20.3602	DEK2_peak_14886	AT3G53500	0
chr3	510791	512146	1357	511328	173.36	24.299	2.42165	21.7632	DEK2_peak_11028	AT3G02480	-166
chr3	22106035	22106589	556	22106261	173.36	24.299	2.42165	21.7632	DEK2_peak_15528	AT3G59840	0
chr4	17788644	17789047	405	17788931	155.49	21.9118	2.42127	19.5364	DEK2_peak_19486	AT4G37830	0
chr2	10825908	10826542	636	10826181	156.38	22.0696	2.42124	19.6846	DEK2_peak_8213	AT2G25440	-193
chr1	6904558	6905005	449	6904744	147.44	20.877	2.42113	18.5729	DEK2_peak_2074	AT1G19890	-29
chr1	9316485	9316924	441	9316706	143.87	20.2394	2.42087	17.9753	DEK2_peak_2696	AT1G26880	0
chr1	7420831	7421422	593	7421020	177.83	24.6823	2.42083	22.1206	DEK2_peak_2216	AT1G21190	0
chr3	5780930	5781886	958	5781628	148.34	21.0298	2.42078	18.713	DEK2_peak_12658	AT3G16940	0
chr5	25279156	25280111	957	25279441	163.53	22.9329	2.42065	20.4919	DEK2_peak_25104	AT5G62998	0
chr4	2452364	2453034	672	2452779	180.51	25.142	2.4201	22.551	DEK2_peak_16344	AT4G04850	0
chr1	5369756	5370282	528	5370091	132.25	18.9536	2.42005	16.7803	DEK2_peak_1657	AT1G15610	-395
chr2	15291357	15292258	903	15291943	132.25	18.9536	2.42005	16.7803	DEK2_peak_9391	AT2G36440	-390
chr1	13076434	13076705	273	13076550	132.25	18.9536	2.42005	16.7803	DEK2_peak_3406	AT1G35513	-140
chr1	3830946	3832721	1777	3831462	132.25	18.9536	2.42005	16.7803	DEK2_peak_1146	AT1G11380	0
chr1	10561240	10561795	557	10561597	132.25	18.9536	2.42005	16.7803	DEK2_peak_2995	AT1G30090	0
chr1	10960569	10961173	606	10960835	132.25	18.9536	2.42005	16.7803	DEK2_peak_3092	AT1G30825	0
chr1	19945483	19946058	577	19945863	132.25	18.9536	2.42005	16.7803	DEK2_peak_4038	AT1G53440	0
chr2	9080670	9081104	436	9080888	132.25	18.9536	2.42005	16.7803	DEK2_peak_7816	AT2G21190	0
chr2	12271991	12272323	334	12272157	132.25	18.9536	2.42005	16.7803	DEK2_peak_8558	AT2G28625	0
chr3	10590000	10590881	883	10590564	132.25	18.9536	2.42005	16.7803	DEK2_peak_13843	AT3G28340	0
chr3	16908845	16909773	930	16909148	132.25	18.9536	2.42005	16.7803	DEK2_peak_14094	AT3G46000	0
chr4	7613171	7613526	357	7613370	132.25	18.9536	2.42005	16.7803	DEK2_peak_16673	AT4G13040	0
chr5	8277445	8277929	486	8277769	132.25	18.9536	2.42005	16.7803	DEK2_peak_22115	AT5G24314	0
chr5	19120675	19121099	426	19120945	132.25	18.9536	2.42005	16.7803	DEK2_peak_23379	AT5G47070	0
chr5	22896287	22899356	3071	22897970	132.25	18.9536	2.42005	16.7803	DEK2_peak_24346	AT5G56550	0
chr3	22629824	22630793	971	22630479	187.66	25.9849	2.41867	23.3379	DEK2_peak_15689	AT3G61150	0
chr2	9626839	9627407	570	9627185	211.78	29.0537	2.418	26.1946	DEK2_peak_7945	AT2G22650	0
chr3	21004148	21004885	739	21004615	170.68	23.7569	2.418	21.2562	DEK2_peak_15221	AT3G56705	0
chr4	8977776	8978074	300	8977921	134.93	18.9974	2.41746	16.8206	DEK2_peak_16913	AT4G15770	0
chr3	489437	489910	475	489704	194.81	26.8279	2.41735	24.1232	DEK2_peak_11020	AT3G02400	0
chr2	15556730	15557144	416	15556890	177.83	24.6005	2.41658	22.0437	DEK2_peak_9475	AT2G37035	0
chr5	24065954	24066591	639	24066224	177.83	24.6005	2.41658	22.0437	DEK2_peak_24715	AT5G59730	0
chr1	2621436	2623043	1609	2621639	146.55	20.6443	2.41649	18.354	DEK2_peak_795	AT1G08315	0
chr3	3577872	3578503	633	3578302	243.06	33.3507	2.41643	30.1865	DEK2_peak_11940	AT3G11400	0
chr5	25497737	25498144	409	25497911	160.85	22.3711	2.41565	19.966	DEK2_peak_25169	AT5G63700	-105
chr3	9755903	9756376	475	9756197	160.85	22.3711	2.41565	19.966	DEK2_peak_13673	AT3G26570	0
chr5	6133706	6134448	744	6134097	159.06	22.4424	2.41536	20.0324	DEK2_peak_21572	AT5G18480	0
chr2	18938027	18938754	729	18938305	184.98	25.444	2.41527	22.8305	DEK2_peak_10609	AT2G46040	0
chr5	7085033	7086099	1068	7085255	163.53	22.8266	2.41468	20.3913	DEK2_peak_21809	AT5G20885	-299
chr5	1556486	1556889	405	1556682	152.81	21.3212	2.41431	18.9887	DEK2_peak_20234	AT5G05240	0
chr1	19893337	19893850	515	19893521	168	23.2154	2.41425	20.7492	DEK2_peak_4024	AT1G53320	0
chr5	5077119	5078243	1126	5077731	155.49	21.7789	2.41343	19.4153	DEK2_peak_21277	AT5G15600	0
chr5	25429063	25429640	579	25429217	155.49	21.7789	2.41343	19.4153	DEK2_peak_25150	AT5G63520	0
chr1	8982820	8986228	3410	8983797	151.02	21.3761	2.413	19.0373	DEK2_peak_2616	AT1G25560	0
chr1	4801745	4802317	574	4801948	155.49	21.7656	2.41265	19.4031	DEK2_peak_1449	AT1G14010	0
chr1	6408941	6410158	1219	6409742	143.87	20.1067	2.41241	17.8554	DEK2_peak_1921	AT1G18620	0
chr5	26348832	26349456	626	26349150	158.17	22.2201	2.41163	19.8226	DEK2_peak_25484	AT5G65860	0
chr3	22121558	22122692	1136	22122316	158.17	22.2201	2.41163	19.8226	DEK2_peak_15533	AT3G59884	207
chr4	17187180	17188094	916	17187456	134.04	19.1434	2.41143	16.9586	DEK2_peak_19230	AT4G36370	0
chr3	219087	219956	871	219635	213.57	29.2049	2.41091	26.3375	DEK2_peak_10939	AT3G01560	0
chr4	14837796	14838356	562	14838079	138.51	19.5288	2.4108	17.3179	DEK2_peak_18511	AT4G30330	0
chr2	15351671	15352511	842	15351998	189.44	26.136	2.41068	23.475	DEK2_peak_9406	AT2G36620	0
chr3	2114760	2115200	442	2114945	189.44	26.136	2.41068	23.475	DEK2_peak_11527	AT3G06680	0
chr3	22611229	22611789	562	22611503	191.23	26.4442	2.41042	23.7658	DEK2_peak_15684	AT3G61100	0
chr4	12886608	12887473	867	12886769	165.32	23.0641	2.41038	20.6056	DEK2_peak_17918	AT4G25100	0
chr5	22182445	22183219	776	22182896	165.32	23.0641	2.41038	20.6056	DEK2_peak_24142	AT5G54600	0
chr5	26029651	26030113	464	26029890	165.32	23.0641	2.41038	20.6056	DEK2_peak_25363	AT5G65158	0
chr1	28577569	28578235	668	28577774	145.66	20.3855	2.41014	18.1128	DEK2_peak_6359	AT1G76150	0
chr3	575901	576555	656	576182	220.72	30.0476	2.41	27.1192	DEK2_peak_11049	AT3G02680	0
chr2	199097	200101	1006	199688	141.19	19.9884	2.40998	17.7428	DEK2_peak_7016	AT2G01440	0
chr1	23700931	23701835	906	23701130	199.27	27.4506	2.40974	24.7017	DEK2_peak_4832	AT1G63855	0
chr3	9493595	9494879	1286	9494683	142.98	19.9013	2.40932	17.6604	DEK2_peak_13599	AT3G25930	0
chr3	22650473	22651653	1182	22651231	172.47	23.908	2.40924	21.3992	DEK2_peak_15698	AT3G61190	0
chr1	28740209	28741055	848	28740685	138.51	19.5023	2.40905	17.293	DEK2_peak_6412	AT1G76590	0
chr5	25373790	25374308	520	25374015	192.12	26.57	2.40894	23.8797	DEK2_peak_25133	AT5G63310	0
chr1	29864158	29864634	478	29864407	179.61	24.7625	2.40873	22.1962	DEK2_peak_6816	AT1G79390	0
chr2	16882294	16882659	367	16882438	148.34	20.8332	2.40868	18.5312	DEK2_peak_9921	AT2G40430	0
chr4	12137378	12138344	968	12138166	148.34	20.8332	2.40868	18.5312	DEK2_peak_17685	AT4G23180	0
chr4	16233971	16234541	572	16234173	148.34	20.8332	2.40868	18.5312	DEK2_peak_18921	AT4G33865	0
chr5	3918635	3919623	990	3919442	153.7	21.3812	2.40849	19.0394	DEK2_peak_20937	AT5G12120	0
chr3	1591995	1593406	1413	1592782	179.61	24.7519	2.40819	22.1865	DEK2_peak_11362	AT3G05500	-28
chr1	27497445	27498452	1009	27498180	179.61	24.7519	2.40819	22.1865	DEK2_peak_5977	AT1G73120	0
chr5	17843444	17843970	528	17843760	179.61	24.7519	2.40819	22.1865	DEK2_peak_23086	AT5G44290	0
chr5	25344950	25345556	608	25345381	155.49	21.678	2.40749	19.3198	DEK2_peak_25128	AT5G63190	0
chr5	24139718	24140164	448	24139961	159.95	22.0719	2.40748	19.6869	DEK2_peak_24745	AT5G59945	0
chr2	8117030	8118209	1181	8117943	159.95	22.0719	2.40748	19.6869	DEK2_peak_7612	AT2G18721	31
chr1	26972843	26973935	1094	26973526	133.15	18.9244	2.40725	16.7568	DEK2_peak_5790	AT1G71700	0
chr3	799268	799652	386	799397	132.25	18.7583	2.40664	16.5992	DEK2_peak_11120	AT3G03380	0
chr1	10432030	10432782	754	10432452	146.55	20.4852	2.40656	18.2082	DEK2_peak_2967	AT1G29800	0
chr4	12909303	12909784	483	12909564	162.64	22.5227	2.4064	20.1089	DEK2_peak_17923	AT4G25170	0
chr1	7521305	7521952	649	7521604	193.91	26.4394	2.40632	23.7617	DEK2_peak_2247	AT1G21480	0
chr2	8849783	8850408	627	8850124	193.91	26.4394	2.40632	23.7617	DEK2_peak_7758	AT2G20560	0
chr2	100222	100567	347	100430	169.78	23.3672	2.40541	20.8925	DEK2_peak_6986	AT2G01150	-82
chr1	27302847	27303658	813	27303375	138.51	19.4455	2.40532	17.2398	DEK2_peak_5905	AT1G72510	0
chr3	1842575	1843614	1041	1843464	138.51	19.4455	2.40532	17.2398	DEK2_peak_11444	AT3G06100	0
chr5	9470132	9470558	428	9470359	138.51	19.4455	2.40532	17.2398	DEK2_peak_22326	AT5G26910	0
chr3	4510203	4511214	1013	4511067	134.04	19.0506	2.40516	16.8714	DEK2_peak_12230	AT3G13750	0
chr3	21448435	21449474	1041	21449114	210	28.4464	2.40507	25.6268	DEK2_peak_15375	AT3G57930	0
chr2	15118481	15119658	1179	15119407	143.87	19.988	2.40484	17.7428	DEK2_peak_9330	AT2G36010	0
chr1	5454241	5455035	796	5454436	141.19	19.9074	2.40477	17.6659	DEK2_peak_1683	AT1G15860	0
chr1	3278562	3279004	444	3278789	171.57	23.663	2.40451	21.167	DEK2_peak_985	AT1G10040	0
chr3	16193624	16193950	328	16193817	176.93	24.2117	2.4045	21.6805	DEK2_peak_14003	AT3G44620	0
chr2	12818929	12820018	1091	12819578	145.66	20.2931	2.40433	18.0264	DEK2_peak_8723	AT2G30032	0
chr5	22401675	22402197	524	22401909	145.66	20.2931	2.40433	18.0264	DEK2_peak_24214	AT5G55230	0
chr2	16529239	16530529	1292	16529639	160.85	22.1717	2.40424	19.7813	DEK2_peak_9788	AT2G39650	0
chr1	21517976	21518407	433	21518151	145.66	20.2912	2.40421	18.0246	DEK2_peak_4369	AT1G58110	0
chr5	25861958	25862517	561	25862312	131.36	18.5605	2.40383	16.4122	DEK2_peak_25302	AT5G64690	-352
chr3	7305407	7306025	620	7305725	131.36	18.5605	2.40383	16.4122	DEK2_peak_13057	AT3G20860	-122
chr1	23481243	23482122	881	23481448	131.36	18.5605	2.40383	16.4122	DEK2_peak_4773	AT1G63300	-71
chr1	4646603	4648191	1590	4647836	131.36	18.5605	2.40383	16.4122	DEK2_peak_1400	AT1G13580	0
chr1	9145855	9146209	356	9146028	131.36	18.5605	2.40383	16.4122	DEK2_peak_2653	AT1G26440	0
chr1	26700210	26700898	690	26700412	131.36	18.5605	2.40383	16.4122	DEK2_peak_5707	AT1G70790	0
chr1	27225564	27226054	492	27225794	131.36	18.5605	2.40383	16.4122	DEK2_peak_5879	AT1G72310	0
chr2	11649668	11650497	831	11650296	131.36	18.5605	2.40383	16.4122	DEK2_peak_8395	AT2G27228	0
chr2	15379211	15379877	668	15379568	131.36	18.5605	2.40383	16.4122	DEK2_peak_9419	AT2G36690	0
chr3	6901052	6901496	446	6901290	131.36	18.5605	2.40383	16.4122	DEK2_peak_12966	AT3G19850	0
chr4	9448672	9449352	682	9449123	131.36	18.5605	2.40383	16.4122	DEK2_peak_17034	AT4G16780	0
chr4	16845755	16846587	834	16846065	131.36	18.5605	2.40383	16.4122	DEK2_peak_19129	AT4G35470	0
chr5	1925186	1925921	737	1925449	131.36	18.5605	2.40383	16.4122	DEK2_peak_20357	AT5G06300	0
chr5	2837863	2838760	899	2838183	131.36	18.5605	2.40383	16.4122	DEK2_peak_20610	AT5G08710	0
chr1	28937701	28938852	1153	28938519	131.36	18.5605	2.40383	16.4122	DEK2_peak_6494	AT1G76994	64
chr4	1382275	1383427	1154	1382645	222.51	30.1994	2.4033	27.2623	DEK2_peak_16274	AT4G03113	0
chr2	17293616	17294189	575	17293812	152.81	21.1367	2.40322	18.8143	DEK2_peak_10044	AT2G41470	0
chr4	9969525	9971015	1492	9970820	152.81	21.1367	2.40322	18.8143	DEK2_peak_17166	AT4G17960	0
chr1	2163092	2164609	1519	2163409	191.23	26.2875	2.40288	23.6181	DEK2_peak_660	AT1G07040	0
chr2	16965578	16966137	561	16965854	192.12	26.4384	2.40264	23.761	DEK2_peak_9945	AT2G40650	0
chr1	27837012	27837787	777	27837533	140.3	19.715	2.40245	17.4936	DEK2_peak_6086	AT1G74020	0
chr2	12759725	12760066	343	12759933	159.95	21.982	2.40231	19.6029	DEK2_peak_8702	AT2G29940	-73
chr5	3978027	3978765	740	3978129	159.95	21.982	2.40231	19.6029	DEK2_peak_20953	AT5G12290	0
chr2	11223090	11223481	393	11223306	136.72	19.078	2.40171	16.897	DEK2_peak_8303	AT2G26360	0
chr4	9739456	9739884	430	9739656	144.76	20.0879	2.40126	17.8372	DEK2_peak_17099	AT4G17460	0
chr1	1821827	1822688	863	1822487	161.74	22.2716	2.40103	19.8717	DEK2_peak_561	AT1G06000	0
chr1	19993228	19993720	494	19993480	212.68	28.8176	2.40087	25.9779	DEK2_peak_4051	AT1G53580	0
chr2	16473709	16475102	1395	16474712	212.68	28.8176	2.40087	25.9779	DEK2_peak_9770	AT2G39450	0
chr1	4465752	4467397	1647	4466931	146.55	20.3929	2.4008	18.1198	DEK2_peak_1333	AT1G13110	0
chr1	6845926	6846532	608	6846327	174.25	24.0596	2.40072	21.5371	DEK2_peak_2054	AT1G19800	0
chr3	19586279	19588009	1732	19587572	135.83	18.9035	2.40048	16.7367	DEK2_peak_14803	AT3G52850	0
chr3	6483738	6484288	552	6484132	181.4	24.9037	2.40002	22.3251	DEK2_peak_12854	AT3G18815	0
chr5	3676143	3676708	567	3676489	193.91	26.3027	2.3998	23.6323	DEK2_peak_20866	AT5G11500	0
chr5	24736672	24737252	582	24736879	174.25	24.0409	2.39973	21.5203	DEK2_peak_24920	AT5G61500	0
chr4	7998395	7998860	467	7998610	142.98	19.75	2.39961	17.517	DEK2_peak_16731	AT4G13780	0
chr3	17479888	17480630	744	17480393	162.64	22.3977	2.39935	19.9904	DEK2_peak_14204	AT3G47430	0
chr5	178395	178873	480	178598	137.61	19.1911	2.39884	17.0032	DEK2_peak_19795	AT5G01430	0
chr2	13653710	13654319	611	13653996	150.13	20.9847	2.39881	18.6709	DEK2_peak_8940	AT2G32120	0
chr5	25107849	25108934	1087	25108508	195.7	26.5917	2.39877	23.9001	DEK2_peak_25046	AT5G62550	0
chr2	13145743	13146375	634	13146091	241.27	32.5752	2.39874	29.4686	DEK2_peak_8812	AT2G30880	0
chr4	15113998	15114787	791	15114369	167.1	23.159	2.3984	20.6955	DEK2_peak_18614	AT4G31040	0
chr2	15514703	15515409	708	15514994	139.4	19.4963	2.39839	17.2872	DEK2_peak_9459	AT2G36950	0
chr3	18673726	18674534	810	18674328	164.42	22.6747	2.39743	20.2474	DEK2_peak_14503	AT3G50360	0
chr5	21316808	21317299	493	21317011	164.42	22.6747	2.39743	20.2474	DEK2_peak_23886	AT5G52530	0
chr1	23412117	23412845	730	23412517	143.87	19.87	2.39732	17.6303	DEK2_peak_4756	AT1G63130	0
chr1	27628781	27629246	467	27628988	131.36	18.4597	2.39686	16.3229	DEK2_peak_6013	AT1G73480	0
chr1	4567589	4568139	552	4567794	171.57	23.5195	2.39683	21.0315	DEK2_peak_1374	AT1G13320	0
chr1	18405386	18405973	589	18405610	171.57	23.5195	2.39683	21.0315	DEK2_peak_3724	AT1G49730	0
chr2	14667855	14668712	859	14668436	171.57	23.5195	2.39683	21.0315	DEK2_peak_9202	AT2G34780	0
chr2	18376403	18377303	902	18376984	171.57	23.5195	2.39683	21.0315	DEK2_peak_10403	AT2G44510	0
chr5	25928825	25929789	966	25929040	184.08	25.3002	2.3965	22.6956	DEK2_peak_25334	AT5G64860	0
chr4	9680830	9681585	757	9681308	192.12	26.3073	2.39638	23.6368	DEK2_peak_17081	AT4G17300	0
chr3	23242050	23242682	634	23242442	178.72	24.3642	2.39627	21.8196	DEK2_peak_15895	AT3G62860	0
chr4	6952301	6952642	343	6952433	145.66	20.1617	2.39608	17.9022	DEK2_peak_16556	AT4G11420	0
chr5	4718561	4719424	865	4718867	150.13	20.937	2.39592	18.6298	DEK2_peak_21164	AT5G14620	0
chr3	21430074	21431089	1017	21430318	185.87	25.2087	2.39576	22.6134	DEK2_peak_15367	AT3G57870	0
chr4	17974995	17975814	821	17975285	185.87	25.2087	2.39576	22.6134	DEK2_peak_19533	AT4G38380	0
chr5	23555688	23556199	513	23555923	185.87	25.2087	2.39576	22.6134	DEK2_peak_24554	AT5G58220	0
chr2	18428153	18428662	511	18428347	138.51	19.2911	2.39516	17.0984	DEK2_peak_10422	AT2G44680	0
chr5	23842434	23842859	427	23842671	139.4	19.4437	2.39496	17.2382	DEK2_peak_24640	AT5G59050	0
chr1	3880097	3881103	1008	3880800	135.83	18.8205	2.39489	16.6586	DEK2_peak_1157	AT1G11545	0
chr1	8431837	8432306	471	8432063	155.49	21.4626	2.39481	19.1167	DEK2_peak_2505	AT1G23870	0
chr3	20350313	20350669	358	20350505	140.3	19.5962	2.39476	17.3823	DEK2_peak_15027	AT3G54925	-333
chr5	25514836	25515514	680	25515157	137.61	19.1255	2.39449	16.9423	DEK2_peak_25173	AT5G63750	0
chr4	15789763	15790427	666	15790251	147.44	20.4434	2.39426	18.1682	DEK2_peak_18805	AT4G32730	0
chr3	18940298	18940948	652	18940567	159.06	22.0719	2.39412	19.6869	DEK2_peak_14589	AT3G50960	0
chr2	17639882	17640652	772	17640160	154.59	21.2892	2.39374	18.9582	DEK2_peak_10148	AT2G42360	-146
chr3	7259637	7260720	1085	7260318	154.59	21.2892	2.39374	18.9582	DEK2_peak_13047	AT3G20760	0
chr1	23554610	23555743	1135	23555463	161.74	22.141	2.39362	19.7526	DEK2_peak_4791	AT1G63500	0
chr1	10180116	10180752	638	10180347	228.76	30.6569	2.39336	27.6879	DEK2_peak_2897	AT1G29150	0
chr1	6607872	6608297	427	6608094	161.74	22.1348	2.39326	19.7467	DEK2_peak_1975	AT1G19120	0
chr4	11970983	11971525	544	11971358	161.74	22.1348	2.39326	19.7467	DEK2_peak_17638	AT4G22780	0
chr5	23426297	23426910	615	23426522	161.74	22.1348	2.39326	19.7467	DEK2_peak_24521	AT5G57815	0
chr4	12166929	12167619	692	12167224	182.29	24.9177	2.39288	22.3375	DEK2_peak_17695	AT4G23250	0
chr1	7909577	7910210	635	7909801	243.06	32.7276	2.39274	29.6062	DEK2_peak_2359	AT1G22403	0
chr3	7999378	8000000	624	7999640	142.08	19.875	2.39269	17.6351	DEK2_peak_13235	AT3G22560	0
chr5	3519730	3520646	918	3520229	176.04	24.2117	2.39243	21.6805	DEK2_peak_20822	AT5G11080	0
chr4	14516877	14517361	486	14517115	131.36	18.3939	2.39231	16.2598	DEK2_peak_18404	AT4G29610	-87
chr5	6348018	6348674	658	6348377	142.08	19.8618	2.39185	17.6229	DEK2_peak_21622	AT5G19010	0
chr5	9288696	9289284	590	9289034	190.34	25.9003	2.39172	23.2569	DEK2_peak_22299	AT5G26742	0
chr2	14980310	14981215	907	14980798	146.55	20.2225	2.39018	17.9599	DEK2_peak_9275	AT2G35635	0
chr2	18862619	18864754	2137	18862966	160.85	21.9238	2.39007	19.5474	DEK2_peak_10586	AT2G45820	0
chr2	14144517	14144926	411	14144676	145.66	20.0571	2.38953	17.8079	DEK2_peak_9058	AT2G33370	0
chr4	17338867	17339225	360	17339054	148.34	20.5141	2.38906	18.235	DEK2_peak_19282	AT4G36791	0
chr3	5200345	5200891	548	5200547	172.47	23.5276	2.389	21.0389	DEK2_peak_12461	AT3G15395	0
chr5	19215757	19217083	1328	19215919	159.06	21.982	2.38897	19.6029	DEK2_peak_23406	AT5G47360	0
chr1	23493932	23494595	665	23494266	135.83	18.7291	2.38875	16.5719	DEK2_peak_4774	AT1G63340	0
chr5	1655847	1656483	638	1656171	166.21	22.8272	2.38871	20.3915	DEK2_peak_20266	AT5G05570	-83
chr1	29627753	29628317	566	29627996	166.21	22.8272	2.38871	20.3915	DEK2_peak_6743	AT1G78800	0
chr2	15166328	15166878	552	15166706	166.21	22.8272	2.38871	20.3915	DEK2_peak_9351	AT2G36130	0
chr1	21424940	21426036	1098	21425630	173.36	23.6722	2.38848	21.1755	DEK2_peak_4354	AT1G57850	0
chr2	18531704	18532680	978	18532028	173.36	23.6722	2.38848	21.1755	DEK2_peak_10461	AT2G44930	0
chr2	16582748	16583100	354	16582939	148.34	20.5011	2.38826	18.2228	DEK2_peak_9818	AT2G39760	0
chr5	400607	401085	480	400901	180.51	24.5171	2.38826	21.9646	DEK2_peak_19867	AT5G02040	0
chr5	17331523	17332276	755	17331858	180.51	24.5171	2.38826	21.9646	DEK2_peak_22958	AT5G43170	0
chr4	9119547	9120513	968	9120003	151.02	20.9581	2.38783	18.6501	DEK2_peak_16944	AT4G16120	-230
chr2	17763970	17764453	485	17764141	131.36	18.3282	2.38778	16.1979	DEK2_peak_10182	AT2G42640	0
chr4	18312695	18313133	440	18312860	201.95	27.0508	2.38769	24.3245	DEK2_peak_19644	AT4G39380	0
chr3	17758179	17759760	1583	17759292	130.47	18.1706	2.3876	16.048	DEK2_peak_14280	AT3G48090	-399
chr4	12357474	12358339	867	12357994	130.47	18.1706	2.3876	16.048	DEK2_peak_17745	AT4G23720	-336
chr5	20752483	20753093	612	20752891	130.47	18.1706	2.3876	16.048	DEK2_peak_23746	AT5G51050	-288
chr4	9551064	9551480	418	9551223	130.47	18.1706	2.3876	16.048	DEK2_peak_17051	AT4G16960	-57
chr1	1494001	1494454	455	1494157	130.47	18.1706	2.3876	16.048	DEK2_peak_477	AT1G05170	0
chr1	28390131	28390693	564	28390327	130.47	18.1706	2.3876	16.048	DEK2_peak_6285	AT1G75600	0
chr2	10665792	10667515	1725	10667074	130.47	18.1706	2.3876	16.048	DEK2_peak_8172	AT2G25070	0
chr2	11494179	11494604	427	11494413	130.47	18.1706	2.3876	16.048	DEK2_peak_8363	AT2G26930	0
chr3	5638239	5640392	2155	5639489	130.47	18.1706	2.3876	16.048	DEK2_peak_12606	AT3G16560	0
[truncated: 2,270 more rows]
