# Supplementary material for: A bivalent histone mark reader, AtDEK2 governs plant immunity
Source: Research Square preprint supplement (doi:10.21203/rs.3.rs-3829971/v1), 2024-03-05
Supplement: Supplementary file 2 [file 6dde4ffc47e46da04cb53072.xlsx]

## Sheet: constructs list
S. No.	ATG No.	Gene name	Vector used	Purpose	Tag orientation
pMHN414	AT5G63550	DEK2	pENTR-D/TOPO	Gateway entry clone	-
pMHN442	AT5G63550	DEK2	pDEST-his-MBP	Protein expression and GST pull-down	N-term-6xHis-MBP
G1616	AT3G45640	MITOGEN-ACTIVATED PROTEIN KINASE 3, MPK3	pDEST-His-MBP	Protein expression	N-term-6xHis-MBP
G1033	AT4G01370	MITOGEN-ACTIVATED PROTEIN KINASE 4, MPK4	pDEST17	Protein expression	N-term-6xHis
G757	AT2G43790	MITOGEN-ACTIVATED PROTEIN KINASE 6, MPK6	pDEST17	Protein expression	N-term-6xHis
BP42	AT5G63550	DEK2	pBIFC2	BiFC	YFPn-GTW
BP43	AT5G63550	DEK2	pBIFC3	BiFC	YFPc-GTW
pHN415	AT3G45640	MITOGEN-ACTIVATED PROTEIN KINASE 3, MPK3	pBiFC3	BiFC	YFPc-GTW
G1654	AT4G01370	MITOGEN-ACTIVATED PROTEIN KINASE 4, MPK4	pBiFC2	BiFC	YFPn-GTW
G3173	AT2G43790	MITOGEN-ACTIVATED PROTEIN KINASE 6, MPK6	pBiFC4	BiFC	GTW-YFPc
pHN485	AT5G23090	NUCLEAR FACTOR Y, SUBUNIT B13", NF-YB13	pBiFC2	BiFC	YFPn-GTW
pMHN469	AT5G23090	NUCLEAR FACTOR Y, SUBUNIT B13", NF-YB13	pBiFC3	BiFC	YFPc-GTW
pMHN466	AT3G12480	NUCLEAR FACTOR Y, SUBUNIT C11", NF-YC11	pBiFC2	BiFC	YFPn-GTW
pHN490	AT3G45640	MITOGEN-ACTIVATED PROTEIN KINASE 3, MPK3	pGEX6p-1	GST pull-down	N-term-GST
pHN491	AT4G01370	MITOGEN-ACTIVATED PROTEIN KINASE 4, MPK4	pGEX6p-1	GST pull-down	N-term-GST
pHN492	AT2G43790	MITOGEN-ACTIVATED PROTEIN KINASE 6, MPK6	pGEX6p-1	GST pull-down	N-term-GST
pMHN276	AT5G63550	DEK2 promoter	pGWB5	Localization	C term-GFP
pMHN487	AT5G63550	DEK2	pGW433-GUS	GUS staining for expression pattern	GUS

## Sheet: primers list
S. No.	ATG No.	Gene name	Orientation	Seq 5' - 3'	Purpose
HA222	AT5G63550	DEK2	LB	ATTGCATTTATGGCCTCTGTG	genotyping dek2-1 (SALK_137152)
HA223	AT5G63550	DEK2	RB	TTGGTTGGATTACCGTCATTC
HA226	AT5G63550	DEK2	LB	TTCTTCCGTGTCAGATGGAAG	genotyping dek2-2 (SALK_033428)
HA227	AT5G63550	DEK2	RB	TTTTTGCTGTTTCAGTGGCTC
N0200	T-DNA LB	SALK	LBb1.3	ATTTTGCCGATTTCGGAAC	T-DNA LB
N0032	AT5G63550	DEK2	Forward	CACCATGGCGACTGAAACCCTAGATG	For cloning into Gateway pENTR-TOPO
N0033	AT5G63550	DEK2	Reverse	TCWATCCTTTGGCTCTTCTTTTTCCTT	For cloning into Gateway pENTR-TOPO
HA228	AT5G63550	DEK2	Forward	AGAGGAGAGTTCAGGGTCCA	level of expression
HA229	AT5G63550	DEK2	Reverse	TTAGCCTGTGGCTTACTCGG
HA234	AT5G63550	DEK2	Forward	GCGTTTCTCGTTGTCGACTC
HA354	AT5G63550	DEK2 promoter region 1KB	Forward	GTGTAAAAACCAAACAATCAAATAACCTGCAGAAC	Gus expression
HA355	AT5G63550	DEK2 promoter region 1KB	Reverse	TTCAAACCCAAACAACAGGCGAATCAAAAC
HA274	AT3G45140	LOX2	Forward	TGCGTAGTCTTCTACCGTAATCCG	qRT-PCR
HA275	AT3G45140	LOX2	Reverse	TGGAGGGCATAACTTGGTCGAG
HA282	AT1G17420	LOX3	Forward	CTTCACTGCTGGTGCATACGG	qRT-PCR
HA283	AT1G17420	LOX3	Reverse	TCGTTGGCGTACGGATAGTC
HA250	AT1G72520	LOX4	Forward	AAACGGTTCGTCTCTAACGCTTG	qRT-PCR
HA251	AT1G72520	LOX4	Reverse	GGAAGACCACATCATCGGTCAAC
HA332	AT3G25760	AOC1	Forward	AATACCGAAAACCCCAGACC	qRT-PCR
HA333	AT3G25760	AOC1	Reverse	TTCGATCACAACGCAGAGAC
HA266	AT3G25770	AOC2	Forward	GCCAAGAAGAACCTCACTGC	qRT-PCR
HA267	AT3G25770	AOC2	Reverse	TCCGAGACCGAACATTAAGC
HA334	AT5G42650	AOS	Forward	CTTACCGGCGCATTGTTTAT	qRT-PCR
HA335	AT5G42650	AOS	Reverse	AAGTCAAAGCCGGTGAAATG
HA328	AT4G37770	ACS8	Forward	GGTTTTCCGGCTATCGTTTCA	qRT-PCR
HA329	AT4G37770	ACS8	Reverse	CACACTGCATTATCCGTTACA
HA256	AT4G11280	ACS6	Forward	TCCCGGCGATGGTTTCTTAGTTC	qRT-PCR
HA257	AT4G11280	ACS6	Reverse	TCCAAGGCTTCCACCGTAATCTTG
HA316	AT5G47230	ERF5	Forward	TCTTCGGATCATCGTCCTCTTC	qRT-PCR
HA317	AT5G47230	ERF5	Reverse	GGTTTGCATACGGATTCAGAGAA
HA264	AT5G61600	ERF104	Forward	TATCTCCGACGTCTCCCAAC	qRT-PCR
HA265	AT5G61600	ERF104	Reverse	GAGTGACGCAAGTGAAAACG
HA258	AT5G47220	ERF2	Forward	TAATTCCGGTGAACCTGACC	qRT-PCR
HA259	AT5G47220	ERF2	Reverse	CACGTGTCTCATCACCAACC
HA318	AT4G17490	ERF6	Forward	GAAAACCGCCGTTGAAGATC	qRT-PCR
HA319	AT4G17490	ERF6	Reverse	CGGTTGCGAATTGAATCCA
HA276	AT2G38470	WRKY33	Forward	CTGTGGTTGGAGAAGCTAGAACG	qRT-PCR
HA277	AT2G38470	WRKY33	Reverse	CTTCCACTTGTTTCAGTCCCTCTC
HA292	AT3G56400	WRKY70	Forward	TGCTCTTGGGAGTTTCTGCGTTG	qRT-PCR
HA293	AT3G56400	WRKY70	Reverse	TGAGCTCGAACCCAAGATGTTCAG
HA298	AT2G22330	CYP79B3	Forward	GGC CAG CCT TTG CTT ACC GCT GAT G	qRT-PCR
HA299	AT2G22330	CYP79B3	Reverse	TCT CCG CAA TGG CCC ATT CCA CGG C
HA300	AT4G31500	CYP83B1	Forward	TGGGATTGCAATGGTAGAGA	qRT-PCR
HA301	AT4G31500	CYP83B1	Reverse	TCCAGTCATGACGTCCATCT
HA296	AT1G18570	MYB51	Forward	TACCGGAGGTTATGCCCTTGTG	qRT-PCR
HA297	AT1G18570	MYB51	Reverse	CCTTCACGGCAACAAATGGTCTG
HA057	AT3g18780	ACTIN2	Forword	ACCACCTGAAAGGAAGTACAGTG	qRT-PCR
HA058	AT3g18780	ACTIN2	Reverse	CTGTGAACGATTCCTGGACCTGC
HA208	At4g05320	UBIQUITIN 10	Forword	GGCCTTGTATAATCCCTGATGA	qRT-PCR
HA209	At4g05320	UBIQUITIN 10	Reverse	AAAGAGATAACAGGAACGGAAA
HA348		Cutinase A in Botrytis cinerea	Forword	AGCCTTATGTCCCTTCCCTTG	qRT-PCR
HA349		Cutinase A in Botrytis cinerea	Reverse	GAAGAGAAATGGAAAATGGTGAG
HA350	At5g26751	ASK1	Forword	CTTATCGGATTTCTCTATGTTTGGC	qRT-PCR
HA351	At5g26751	ASK1	Reverse	GAGCTCCTGTTTATTTAACTTGTACATACC
HA485		TCP binding site	Forword	CAATTTTAGTGGGCCCCTGCTACAT	EMSA
HA486		TCP binding site	Reverse	ATGTAGCAGGGGCCCACTAAAATTG
