# Supplementary material for: A bivalent histone mark reader, AtDEK2 governs plant immunity
Source: Research Square preprint supplement (doi:10.21203/rs.3.rs-3829971/v1), 2024-03-05
Supplement: Supplementary file 3 [file 771b92588d6566b8e45ef2db.xlsx]

## Sheet: WT_M_vs_dek2_M
test_id	gene_id	gene	locus	sample_1	sample_2	status	value_1	value_2	log2(fold_change)	test_stat	p_value	q_value	significant	gene_name	gene_description
AT1G01010	AT1G01010	-	1:3630-5899	Col0Mockb_dir	dek2_1Mocka_dir	OK	2.87064	2.47814	-0.212114	-0.483114	0.46005	0.780593	no	NAC001	NAC domain containing protein 1
AT1G01020	AT1G01020	-	1:5927-8737	Col0Mockb_dir	dek2_1Mocka_dir	OK	3.34185	2.902	-0.203597	-0.494598	0.4347	0.767161	no	ARV1	ARV1 family protein
AT1G01030	AT1G01030	-	1:11648-13714	Col0Mockb_dir	dek2_1Mocka_dir	OK	1.82037	1.5953	-0.1904	-0.351925	0.57645	0.842881	no	NGA3	AP2/B3-like transcriptional factor family protein
AT1G01040	AT1G01040	-	1:23145-33153	Col0Mockb_dir	dek2_1Mocka_dir	OK	4.26478	3.8789	-0.136824	-0.421833	0.51425	0.812667	no	DCL1	dicer-like 1
AT1G01050	AT1G01050	-	1:23145-33153	Col0Mockb_dir	dek2_1Mocka_dir	OK	11.0021	10.0849	-0.125586	-0.247673	0.70245	0.900337	no	PPa1	pyrophosphorylase 1
AT1G01060	AT1G01060	-	1:33378-37871	Col0Mockb_dir	dek2_1Mocka_dir	OK	29.0589	26.6193	-0.126507	-0.489167	0.4433	0.771682	no	LHY	Homeodomain-like superfamily protein
AT1G01070	AT1G01070	-	1:38751-40944	Col0Mockb_dir	dek2_1Mocka_dir	OK	3.1511	3.03674	-0.0533309	-0.115216	0.86075	0.956618	no	UMAMIT28	nodulin MtN21 /EamA-like transporter family protein
AT1G01073	AT1G01073	-	1:44676-44787	Col0Mockb_dir	dek2_1Mocka_dir	NOTEST	0	0	0	0	1	1	no
AT1G01080	AT1G01080	-	1:45295-47019	Col0Mockb_dir	dek2_1Mocka_dir	OK	43.3555	41.0069	-0.0803497	-0.309589	0.6359	0.873377	no	AT1G01080	RNA-binding (RRM/RBD/RNP motifs) family protein
AT1G01090	AT1G01090	-	1:47484-49286	Col0Mockb_dir	dek2_1Mocka_dir	OK	151.278	133.027	-0.185485	-0.730447	0.27545	0.64403	no	PDH-E1 ALPHA	pyruvate dehydrogenase E1 alpha
AT1G01100	AT1G01100	-	1:50074-51199	Col0Mockb_dir	dek2_1Mocka_dir	OK	289.592	290.553	0.00478317	0.0181159	0.9778	0.993806	no	AT1G01100	60S acidic ribosomal protein family
AT1G01110	AT1G01110	-	1:52238-54692	Col0Mockb_dir	dek2_1Mocka_dir	OK	2.70105	2.52617	-0.0965729	-0.239872	0.70935	0.903379	no	IQD18	IQ-domain 18
AT1G01115	AT1G01115	-	1:56623-56740	Col0Mockb_dir	dek2_1Mocka_dir	NOTEST	0	0	0	0	1	1	no
AT1G01120	AT1G01120	-	1:57268-59167	Col0Mockb_dir	dek2_1Mocka_dir	OK	36.5022	42.0511	0.204159	0.827428	0.22445	0.593011	no	KCS1	3-ketoacyl-CoA synthase 1
AT1G01130	AT1G01130	-	1:61904-63811	Col0Mockb_dir	dek2_1Mocka_dir	OK	0.68266	1.81457	1.41039	1.88146	0.00515	0.0946318	no	AT1G01130	CBL-interacting Serine/Threonine-kinase
AT1G01140	AT1G01140	-	1:64165-67625	Col0Mockb_dir	dek2_1Mocka_dir	OK	2.62433	4.27301	0.703305	1.93397	0.00325	0.07066	no	CIPK9	CBL-interacting protein kinase 9
AT1G01150	AT1G01150	-	1:70114-72138	Col0Mockb_dir	dek2_1Mocka_dir	NOTEST	0.025293	0.0817794	1.693	0	1	1	no	AT1G01150	Homeodomain-like protein with RING/FYVE/PHD-type zinc finger domain-containing protein
AT1G01160	AT1G01160	-	1:72338-74737	Col0Mockb_dir	dek2_1Mocka_dir	OK	14.6591	14.7453	0.00845157	0.0167562	0.97965	0.993859	no	GIF2	GRF1-interacting factor 2
AT1G01170	AT1G01170	-	1:72338-74737	Col0Mockb_dir	dek2_1Mocka_dir	OK	113.525	84.9778	-0.417852	-1.26923	0.0522	0.316126	no	AT1G01170	ozone-responsive stress-like protein (DUF1138)
AT1G01180	AT1G01180	-	1:75582-76758	Col0Mockb_dir	dek2_1Mocka_dir	OK	7.3569	8.38022	0.187889	0.556504	0.4264	0.762134	no	AT1G01180	S-adenosyl-L-methionine-dependent methyltransferases superfamily protein
AT1G01190	AT1G01190	-	1:83044-84864	Col0Mockb_dir	dek2_1Mocka_dir	OK	6.78362	2.60874	-1.3787	-3.55257	5e-05	0.00323653	yes	CYP78A8	cytochrome P450, family 78, subfamily A, polypeptide 8
AT1G01200	AT1G01200	-	1:86514-88213	Col0Mockb_dir	dek2_1Mocka_dir	OK	3.54983	3.90697	0.1383	0.310075	0.6345	0.872416	no	RABA3	RAB GTPase homolog A3
AT1G01210	AT1G01210	-	1:88897-89745	Col0Mockb_dir	dek2_1Mocka_dir	OK	14.1435	10.5657	-0.420749	-1.10162	0.0877	0.400659	no	AT1G01210	DNA-directed RNA polymerase, subunit M, archaeal
AT1G01220	AT1G01220	-	1:91375-95651	Col0Mockb_dir	dek2_1Mocka_dir	OK	10.2027	9.7177	-0.0702713	-0.262891	0.6849	0.891775	no	FKGP	L-fucokinase/GDP-L-fucose pyrophosphorylase
AT1G01225	AT1G01225	-	1:95986-97407	Col0Mockb_dir	dek2_1Mocka_dir	OK	6.09219	5.39989	-0.17403	-0.42835	0.5083	0.809403	no	AT1G01225	NC domain-containing protein-like protein
AT1G01230	AT1G01230	-	1:97455-99240	Col0Mockb_dir	dek2_1Mocka_dir	OK	14.3411	17.3762	0.276955	0.94638	0.15275	0.506381	no	AT1G01230	ORMDL family protein
AT1G01240	AT1G01240	-	1:99893-101834	Col0Mockb_dir	dek2_1Mocka_dir	OK	13.9858	12.4971	-0.162371	-0.575782	0.3875	0.732422	no	AT1G01240	transmembrane protein
AT1G01250	AT1G01250	-	1:104490-105330	Col0Mockb_dir	dek2_1Mocka_dir	OK	3.80062	2.21206	-0.780844	-1.41003	0.0557	0.325085	no	AT1G01250	Integrase-type DNA-binding superfamily protein
AT1G01260	AT1G01260	-	1:108945-111609	Col0Mockb_dir	dek2_1Mocka_dir	OK	6.11877	4.6534	-0.394956	-1.25749	0.05025	0.312195	no	AT1G01260	basic helix-loop-helix (bHLH) DNA-binding superfamily protein
AT1G01280	AT1G01280	-	1:112262-113947	Col0Mockb_dir	dek2_1Mocka_dir	NOTEST	0	0	0	0	1	1	no	CYP703A2	cytochrome P450, family 703, subfamily A, polypeptide 2
AT1G01290	AT1G01290	-	1:114285-116108	Col0Mockb_dir	dek2_1Mocka_dir	OK	9.51962	9.41059	-0.0166181	-0.0508585	0.93215	0.979305	no	CNX3	cofactor of nitrate reductase and xanthine dehydrogenase 3
AT1G01300	AT1G01300	-	1:116942-118764	Col0Mockb_dir	dek2_1Mocka_dir	OK	41.4109	30.346	-0.448504	-1.94098	0.00795	0.121642	no	AT1G01300	Eukaryotic aspartyl protease family protein
AT1G01305	AT1G01305	-	1:119396-119997	Col0Mockb_dir	dek2_1Mocka_dir	NOTEST	0	0	0	0	1	1	no	AT1G01305	hypothetical protein
AT1G01310	AT1G01310	-	1:120153-130577	Col0Mockb_dir	dek2_1Mocka_dir	NOTEST	0	0.137937	inf	0	1	1	no	AT1G01310	CAP (Cysteine-rich secretory proteins, Antigen 5, and Pathogenesis-related 1 protein) superfamily protein
AT1G01320	AT1G01320	-	1:120153-130577	Col0Mockb_dir	dek2_1Mocka_dir	OK	48.8357	40.6823	-0.263535	-0.974448	0.1292	0.472895	no	AT1G01320	Tetratricopeptide repeat (TPR)-like superfamily protein
AT1G01340	AT1G01340	-	1:132327-135831	Col0Mockb_dir	dek2_1Mocka_dir	OK	3.41725	2.4649	-0.471305	-1.2518	0.0502	0.312176	no	CNGC10	cyclic nucleotide gated channel 10
AT1G01350	AT1G01350	-	1:136123-138162	Col0Mockb_dir	dek2_1Mocka_dir	OK	10.2285	10.7062	0.0658561	0.219808	0.7281	0.911154	no	AT1G01350	Zinc finger (CCCH-type/C3HC4-type RING finger) family protein
AT1G01355	AT1G01355	-	1:138512-139568	Col0Mockb_dir	dek2_1Mocka_dir	NOTEST	0	0.0387038	inf	0	1	1	no	AT1G01355	Putative endonuclease or glycosyl hydrolase
AT1G01360	AT1G01360	-	1:141970-143183	Col0Mockb_dir	dek2_1Mocka_dir	OK	7.33238	7.53855	0.0400049	0.101562	0.86995	0.959252	no	RCAR1	regulatory component of ABA receptor 1
AT1G01370	AT1G01370	-	1:143563-145684	Col0Mockb_dir	dek2_1Mocka_dir	OK	2.97374	2.24165	-0.407721	-0.852161	0.1954	0.561581	no	HTR12	Histone superfamily protein
AT1G01380	AT1G01380	-	1:147152-147942	Col0Mockb_dir	dek2_1Mocka_dir	OK	1.20972	2.21058	0.869747	0.92134	0.15	0.502697	no	ETC1	Homeodomain-like superfamily protein
AT1G01390	AT1G01390	-	1:148119-149806	Col0Mockb_dir	dek2_1Mocka_dir	OK	3.77605	1.64055	-1.2027	-2.66374	0.00045	0.0184223	yes	AT1G01390	UDP-Glycosyltransferase superfamily protein
AT1G01400	AT1G01400	-	1:150688-152210	Col0Mockb_dir	dek2_1Mocka_dir	NOTEST	0	0	0	0	1	1	no	AT1G01400	hypothetical protein
AT1G01410	AT1G01410	-	1:153112-154198	Col0Mockb_dir	dek2_1Mocka_dir	NOTEST	0	0	0	0	1	1	no	PUM22	pumilio 22
AT1G01420	AT1G01420	-	1:154491-156011	Col0Mockb_dir	dek2_1Mocka_dir	OK	9.22805	6.74643	-0.451902	-1.46669	0.03675	0.26927	no	UGT72B3	UDP-glucosyl transferase 72B3
AT1G01430	AT1G01430	-	1:156800-158655	Col0Mockb_dir	dek2_1Mocka_dir	OK	58.6894	43.0258	-0.4479	-1.7693	0.00685	0.111667	no	TBL25	TRICHOME BIREFRINGENCE-LIKE 25
AT1G01440	AT1G01440	-	1:159855-162572	Col0Mockb_dir	dek2_1Mocka_dir	OK	2.90268	2.51549	-0.206543	-0.531525	0.4309	0.764991	no	AT1G01440	hypothetical protein (DUF3133)
AT1G01450	AT1G01450	-	1:164104-165517	Col0Mockb_dir	dek2_1Mocka_dir	OK	1.91709	1.65903	-0.208577	-0.343312	0.6026	0.855883	no	AT1G01450	Protein kinase superfamily protein
AT1G01453	AT1G01453	-	1:166588-167842	Col0Mockb_dir	dek2_1Mocka_dir	NOTEST	0.0584945	0.234849	2.00536	0	1	1	no	AT1G01453	late embryogenesis abundant hydroxyproline-rich glycoprotein family protein
AT1G01460	AT1G01460	-	1:168722-171165	Col0Mockb_dir	dek2_1Mocka_dir	NOTEST	0	0	0	0	1	1	no	PIPK11	Phosphatidylinositol-4-phosphate 5-kinase, core
AT1G01470	AT1G01470	-	1:172145-172948	Col0Mockb_dir	dek2_1Mocka_dir	OK	62.9828	67.0869	0.0910741	0.349526	0.5985	0.853995	no	LEA14	Late embryogenesis abundant protein
AT1G01471	AT1G01471	-	1:173250-173466	Col0Mockb_dir	dek2_1Mocka_dir	NOTEST	0	0	0	0	1	1	no
AT1G01480	AT1G01480	-	1:175781-178400	Col0Mockb_dir	dek2_1Mocka_dir	OK	1.11513	0.972105	-0.198023	-0.315196	0.62605	0.868889	no	ACS2	1-amino-cyclopropane-1-carboxylate synthase 2
AT1G01490	AT1G01490	-	1:180058-182358	Col0Mockb_dir	dek2_1Mocka_dir	OK	38.1938	37.4579	-0.0280673	-0.108534	0.8697	0.959252	no	AT1G01490	Heavy metal transport/detoxification superfamily protein
AT1G01500	AT1G01500	-	1:185132-186923	Col0Mockb_dir	dek2_1Mocka_dir	OK	7.85924	7.34274	-0.0980715	-0.306735	0.64275	0.876222	no	AT1G01500	Erythronate-4-phosphate dehydrogenase family protein
AT1G01510	AT1G01510	-	1:187210-190056	Col0Mockb_dir	dek2_1Mocka_dir	OK	7.53086	6.54337	-0.20278	-0.710005	0.28545	0.653464	no	AN	NAD(P)-binding Rossmann-fold superfamily protein
AT1G01520	AT1G01520	-	1:190595-192139	Col0Mockb_dir	dek2_1Mocka_dir	OK	0.532445	0.456218	-0.222909	-0.200048	0.75835	0.923593	no	ASG4	Homeodomain-like superfamily protein
AT1G01530	AT1G01530	-	1:192639-193670	Col0Mockb_dir	dek2_1Mocka_dir	NOTEST	0	0.0419746	inf	0	1	1	no	AGL28	AGAMOUS-like 28
AT1G01540	AT1G01540	-	1:195779-198684	Col0Mockb_dir	dek2_1Mocka_dir	OK	16.0311	15.3251	-0.0649824	-0.249987	0.70075	0.899373	no	AT1G01540	Protein kinase superfamily protein
AT1G01550	AT1G01550	-	1:199638-201775	Col0Mockb_dir	dek2_1Mocka_dir	OK	90.7491	99.4301	0.1318	0.516612	0.41815	0.756297	no	BPS1	BPS1-like protein (DUF793)
AT1G01560	AT1G01560	-	1:202135-204335	Col0Mockb_dir	dek2_1Mocka_dir	NOTEST	0	0.221703	inf	0	1	1	no	MPK11	MAP kinase 11
AT1G01570	AT1G01570	-	1:205175-207435	Col0Mockb_dir	dek2_1Mocka_dir	OK	1.00342	0.747096	-0.425566	-0.619696	0.33655	0.692303	no	AT1G01570	transferring glycosyl group transferase (DUF604)
AT1G01580	AT1G01580	-	1:209394-213041	Col0Mockb_dir	dek2_1Mocka_dir	OK	35.4815	27.1659	-0.385273	-1.46069	0.0235	0.212288	no	FRO2	ferric reduction oxidase 2
AT1G01590	AT1G01590	-	1:214228-217304	Col0Mockb_dir	dek2_1Mocka_dir	NOTEST	0.206788	0.0463483	-2.15756	0	1	1	no	FRO1	ferric reduction oxidase 1
AT1G01600	AT1G01600	-	1:218993-221286	Col0Mockb_dir	dek2_1Mocka_dir	OK	2.81532	3.58327	0.347976	0.941954	0.17145	0.531344	no	CYP86A4	cytochrome P450, family 86, subfamily A, polypeptide 4
AT1G01610	AT1G01610	-	1:221690-224340	Col0Mockb_dir	dek2_1Mocka_dir	OK	23.9879	20.365	-0.236215	-0.942234	0.1623	0.518222	no	GPAT4	glycerol-3-phosphate acyltransferase 4
AT1G01620	AT1G01620	-	1:225664-227302	Col0Mockb_dir	dek2_1Mocka_dir	OK	107.046	116.971	0.12792	0.507786	0.44955	0.77418	no	PIP1C	plasma membrane intrinsic protein 1C
AT1G01630	AT1G01630	-	1:229012-230917	Col0Mockb_dir	dek2_1Mocka_dir	OK	13.6327	15.1368	0.150987	0.530967	0.4129	0.752536	no	AT1G01630	Sec14p-like phosphatidylinositol transfer family protein
AT1G01640	AT1G01640	-	1:230993-232508	Col0Mockb_dir	dek2_1Mocka_dir	OK	7.14337	5.72477	-0.319387	-0.826798	0.20025	0.567322	no	AT1G01640	BTB/POZ domain-containing protein
AT1G01650	AT1G01650	-	1:232840-237817	Col0Mockb_dir	dek2_1Mocka_dir	OK	3.56029	3.11196	-0.194172	-0.606015	0.3576	0.70933	no	SPPL4	SIGNAL PEPTIDE PEPTIDASE-LIKE 4
AT1G01660	AT1G01660	-	1:240056-242608	Col0Mockb_dir	dek2_1Mocka_dir	NOTEST	0.355429	0.502815	0.500466	0	1	1	no	AT1G01660	RING/U-box superfamily protein
AT1G01670	AT1G01670	-	1:242842-245988	Col0Mockb_dir	dek2_1Mocka_dir	OK	0.534047	0.609418	0.190465	0.25302	0.68935	0.894222	no	AT1G01670	RING/U-box superfamily protein
AT1G01680	AT1G01680	-	1:246410-248367	Col0Mockb_dir	dek2_1Mocka_dir	NOTEST	0.135979	0.0962123	-0.499088	0	1	1	no	PUB54	plant U-box 54
AT1G01690	AT1G01690	-	1:249140-252462	Col0Mockb_dir	dek2_1Mocka_dir	OK	1.26798	0.996851	-0.347087	-0.642397	0.31325	0.675602	no	PRD3	putative recombination initiation defects 3
AT1G01695	AT1G01695	-	1:252946-254495	Col0Mockb_dir	dek2_1Mocka_dir	OK	0.966634	0.606417	-0.672659	-0.732925	0.2501	0.617951	no	TRM33	Phosphatidylinositol N-acetyglucosaminlytransferase subunit P-like protein
AT1G01700	AT1G01700	-	1:259494-261474	Col0Mockb_dir	dek2_1Mocka_dir	OK	1.09667	0.636598	-0.784675	-1.03118	0.11845	0.456065	no	ROPGEF2	RHO guanyl-nucleotide exchange factor 2
AT1G01710	AT1G01710	-	1:262827-267771	Col0Mockb_dir	dek2_1Mocka_dir	OK	5.10502	4.55134	-0.165626	-0.565025	0.381	0.727029	no	AT1G01710	acyl-CoA thioesterase II
AT1G01720	AT1G01720	-	1:268329-270775	Col0Mockb_dir	dek2_1Mocka_dir	OK	37.266	33.1439	-0.169114	-0.658826	0.3399	0.695391	no	ATAF1	NAC (No Apical Meristem) domain transcriptional regulator superfamily protein
AT1G01725	AT1G01725	-	1:268329-270775	Col0Mockb_dir	dek2_1Mocka_dir	OK	8.79756	6.7125	-0.390253	-0.38438	0.5586	0.833656	no	AT1G01725	adenylosuccinate synthetase
AT1G01730	AT1G01730	-	1:270955-272061	Col0Mockb_dir	dek2_1Mocka_dir	OK	23.8353	18.521	-0.363939	-1.32149	0.053	0.31703	no	AT1G01730	hypothetical protein
AT1G01740	AT1G01740	-	1:272110-274569	Col0Mockb_dir	dek2_1Mocka_dir	OK	2.08432	1.83487	-0.183894	-0.377127	0.5685	0.83846	no	BSK4	kinase with tetratricopeptide repeat domain-containing protein
AT1G01750	AT1G01750	-	1:275365-278448	Col0Mockb_dir	dek2_1Mocka_dir	OK	16.9561	20.696	0.287552	0.883889	0.18015	0.542545	no	ADF11	actin depolymerizing factor 11
AT1G01760	AT1G01760	-	1:275365-278448	Col0Mockb_dir	dek2_1Mocka_dir	NOTEST	0.413493	0.301337	-0.456487	0	1	1	no	AT1G01760	denosine deaminases acting on tRNA
AT1G01770	AT1G01770	-	1:278614-284245	Col0Mockb_dir	dek2_1Mocka_dir	OK	2.51806	2.87611	0.191802	0.319085	0.61255	0.861667	no	AT1G01770	propionyl-CoA carboxylase
AT1G01780	AT1G01780	-	1:278614-284245	Col0Mockb_dir	dek2_1Mocka_dir	OK	18.4137	15.6899	-0.23094	-0.630448	0.32485	0.684551	no	PLIM2b	GATA type zinc finger transcription factor family protein
AT1G01790	AT1G01790	-	1:284609-291094	Col0Mockb_dir	dek2_1Mocka_dir	OK	13.5393	13.5676	0.00301311	0.0116704	0.9877	0.995842	no	KEA1	K efflux antiporter 1
AT1G01800	AT1G01800	-	1:293341-295040	Col0Mockb_dir	dek2_1Mocka_dir	OK	49.2532	46.8433	-0.0723761	-0.279786	0.6616	0.882296	no	AT1G01800	NAD(P)-binding Rossmann-fold superfamily protein
AT1G01810	AT1G01810	-	1:295220-295859	Col0Mockb_dir	dek2_1Mocka_dir	OK	1.0676	0.70496	-0.598757	-0.547803	0.4239	0.760693	no	AT1G01810	hypothetical protein
AT1G01820	AT1G01820	-	1:296000-298120	Col0Mockb_dir	dek2_1Mocka_dir	OK	11.6129	9.2922	-0.321637	-1.04891	0.1038	0.431587	no	PEX11C	peroxin 11c
AT1G01830	AT1G01830	-	1:298534-302315	Col0Mockb_dir	dek2_1Mocka_dir	OK	5.45742	5.45233	-0.00134562	-0.00459864	0.9943	0.997803	no	AT1G01830	ARM repeat superfamily protein
AT1G01840	AT1G01840	-	1:303536-306287	Col0Mockb_dir	dek2_1Mocka_dir	OK	4.20321	3.51716	-0.257081	-0.340139	0.6291	0.869488	no	AT1G01840	AP2-like ethylene-responsive transcription factor SNZ
AT1G01860	AT1G01860	-	1:303536-306287	Col0Mockb_dir	dek2_1Mocka_dir	OK	10.6178	8.43711	-0.331669	-1.03786	0.1099	0.441663	no	PFC1	Ribosomal RNA adenine dimethylase family protein
AT1G01880	AT1G01880	-	1:306479-309109	Col0Mockb_dir	dek2_1Mocka_dir	OK	0.610091	0.885305	0.537151	0.714355	0.26965	0.638609	no	AT1G01880	5'-3' exonuclease family protein
AT1G01900	AT1G01900	-	1:310315-315902	Col0Mockb_dir	dek2_1Mocka_dir	OK	4.4353	3.99126	-0.152187	-0.29159	0.6859	0.892086	no	SBTI1.1	subtilase family protein
AT1G01910	AT1G01910	-	1:310315-315902	Col0Mockb_dir	dek2_1Mocka_dir	OK	16.1739	14.5453	-0.153119	-0.478524	0.4553	0.777767	no	AT1G01910	P-loop containing nucleoside triphosphate hydrolases superfamily protein
AT1G01920	AT1G01920	-	1:316127-319650	Col0Mockb_dir	dek2_1Mocka_dir	OK	3.94265	3.42775	-0.201903	-0.589133	0.35995	0.711302	no	AT1G01920	SET domain-containing protein
AT1G01930	AT1G01930	-	1:319835-322860	Col0Mockb_dir	dek2_1Mocka_dir	OK	3.0443	3.00921	-0.0167265	-0.0470406	0.9447	0.983886	no	AT1G01930	zinc finger protein-like protein
AT1G01940	AT1G01940	-	1:323026-324917	Col0Mockb_dir	dek2_1Mocka_dir	OK	9.58516	8.68184	-0.142801	-0.441429	0.49495	0.801675	no	AT1G01940	Cyclophilin-like peptidyl-prolyl cis-trans isomerase family protein
AT1G01950	AT1G01950	-	1:325378-337582	Col0Mockb_dir	dek2_1Mocka_dir	OK	2.51579	2.27291	-0.14647	-0.20862	0.74545	0.918941	no	ARK2	armadillo repeat kinesin 2
AT1G01960	AT1G01960	-	1:325378-337582	Col0Mockb_dir	dek2_1Mocka_dir	OK	10.9448	9.17951	-0.25376	-0.926686	0.1505	0.503271	no	EDA10	SEC7-like guanine nucleotide exchange family protein
AT1G01970	AT1G01970	-	1:338290-340077	Col0Mockb_dir	dek2_1Mocka_dir	OK	30.605	24.2797	-0.334014	-1.27026	0.0514	0.314924	no	AT1G01970	Tetratricopeptide repeat (TPR)-like superfamily protein
AT1G01980	AT1G01980	-	1:340171-341999	Col0Mockb_dir	dek2_1Mocka_dir	NOTEST	0	0	0	0	1	1	no	AT1G01980	FAD-binding Berberine family protein
AT1G01990	AT1G01990	-	1:343165-344341	Col0Mockb_dir	dek2_1Mocka_dir	OK	22.868	13.764	-0.732431	-2.69201	0.0002	0.0099685	yes	AT1G01990	hypothetical protein
AT1G02000	AT1G02000	-	1:345811-347592	Col0Mockb_dir	dek2_1Mocka_dir	OK	7.39261	6.772	-0.126502	-0.438936	0.54075	0.825809	no	GAE2	UDP-D-glucuronate 4-epimerase 2
AT1G02010	AT1G02010	-	1:347890-352480	Col0Mockb_dir	dek2_1Mocka_dir	OK	2.61488	2.21637	-0.238547	-0.670873	0.29985	0.665676	no	SEC1A	secretory 1A
AT1G02020	AT1G02020	-	1:352636-354969	Col0Mockb_dir	dek2_1Mocka_dir	OK	7.93666	5.62804	-0.495901	-1.74774	0.013	0.159988	no	AT1G02020	nitroreductase family protein
AT1G02030	AT1G02030	-	1:355320-357258	Col0Mockb_dir	dek2_1Mocka_dir	NOTEST	0.385119	0.163663	-1.23458	0	1	1	no	AT1G02030	C2H2-like zinc finger protein
AT1G02040	AT1G02040	-	1:358103-359078	Col0Mockb_dir	dek2_1Mocka_dir	NOTEST	0	0.0688526	inf	0	1	1	no	AT1G02040	C2H2-type zinc finger family protein
AT1G02050	AT1G02050	-	1:359116-360518	Col0Mockb_dir	dek2_1Mocka_dir	OK	6.39937	5.83813	-0.132424	-0.408481	0.55565	0.832056	no	LAP6	Chalcone and stilbene synthase family protein
AT1G02060	AT1G02060	-	1:360917-363094	Col0Mockb_dir	dek2_1Mocka_dir	OK	0.783395	0.740856	-0.0805461	-0.11118	0.86175	0.956932	no	AT1G02060	Tetratricopeptide repeat (TPR)-like superfamily protein
AT1G02065	AT1G02065	-	1:365208-367340	Col0Mockb_dir	dek2_1Mocka_dir	NOTEST	0.259769	0.401308	0.627478	0	1	1	no	SPL8	squamosa promoter binding protein-like 8
AT1G02070	AT1G02070	-	1:370256-370967	Col0Mockb_dir	dek2_1Mocka_dir	NOTEST	0.118403	0.189025	0.674867	0	1	1	no	AT1G02070	zinc ion-binding protein
AT1G02074	AT1G02074	-	1:372063-372210	Col0Mockb_dir	dek2_1Mocka_dir	NOTEST	0	0.315521	inf	0	1	1	no
AT1G02080	AT1G02080	-	1:373334-386847	Col0Mockb_dir	dek2_1Mocka_dir	OK	8.28413	6.75777	-0.293802	-1.15318	0.0823	0.389055	no	AT1G02080	transcription regulator
AT1G02090	AT1G02090	-	1:387276-389647	Col0Mockb_dir	dek2_1Mocka_dir	OK	5.98955	6.30775	0.0746773	0.225499	0.72025	0.908147	no	FUS5	Proteasome component (PCI) domain protein
AT1G02100	AT1G02100	-	1:389811-392816	Col0Mockb_dir	dek2_1Mocka_dir	OK	11.212	9.49257	-0.240178	-0.855129	0.19835	0.564768	no	SBI1	Leucine carboxyl methyltransferase
AT1G02110	AT1G02110	-	1:392830-395528	Col0Mockb_dir	dek2_1Mocka_dir	OK	11.9656	8.70005	-0.459796	-2.00724	0.00885	0.129737	no	AT1G02110	bZIP domain class transcription factor (DUF630 and DUF632)
AT1G02120	AT1G02120	-	1:395760-399897	Col0Mockb_dir	dek2_1Mocka_dir	OK	15.3393	14.9701	-0.0351445	-0.13541	0.8351	0.948789	no	VAD1	GRAM domain family protein
AT1G02130	AT1G02130	-	1:400034-401882	Col0Mockb_dir	dek2_1Mocka_dir	OK	19.0388	16.6802	-0.190801	-0.679589	0.2989	0.665676	no	RA-5	RAS 5
AT1G02140	AT1G02140	-	1:403189-404456	Col0Mockb_dir	dek2_1Mocka_dir	OK	40.6201	40.1807	-0.0156889	-0.0594684	0.92575	0.97763	no	MAGO	mago nashi family protein
AT1G02145	AT1G02145	-	1:404599-408619	Col0Mockb_dir	dek2_1Mocka_dir	OK	1.96159	1.89537	-0.0495397	-0.11678	0.86015	0.956591	no	ALG12	homolog of asparagine-linked glycosylation 12
AT1G02150	AT1G02150	-	1:408621-410611	Col0Mockb_dir	dek2_1Mocka_dir	OK	66.582	55.9814	-0.250185	-1.03163	0.12905	0.472895	no	AT1G02150	Tetratricopeptide repeat (TPR)-like superfamily protein
AT1G02160	AT1G02160	-	1:410747-411597	Col0Mockb_dir	dek2_1Mocka_dir	OK	18.6579	16.4524	-0.181495	-0.523173	0.41305	0.752577	no	AT1G02160	Cox19 family protein (CHCH motif)
AT1G02170	AT1G02170	-	1:411778-414645	Col0Mockb_dir	dek2_1Mocka_dir	OK	10.5816	8.3406	-0.343337	-0.872875	0.1998	0.566853	no	MC1	metacaspase 1
AT1G02180	AT1G02180	-	1:411778-414645	Col0Mockb_dir	dek2_1Mocka_dir	OK	6.30848	6.64824	0.0756784	0.0846278	0.86995	0.959252	no	AT1G02180	ferredoxin-like protein
AT1G02190	AT1G02190	-	1:415078-418010	Col0Mockb_dir	dek2_1Mocka_dir	NOTEST	0.170985	0.0604327	-1.50046	0	1	1	no	AT1G02190	Fatty acid hydroxylase superfamily
AT1G02205	AT1G02205	-	1:418747-422438	Col0Mockb_dir	dek2_1Mocka_dir	OK	5.4421	3.64399	-0.578645	-1.8454	0.0052	0.0951996	no	CER1	Fatty acid hydroxylase superfamily
AT1G02210	AT1G02210	-	1:427547-427811	Col0Mockb_dir	dek2_1Mocka_dir	NOTEST	0	0	0	0	1	1	no	AT1G02210	NAC (No Apical Meristem) domain transcriptional regulator superfamily protein
AT1G02220	AT1G02220	-	1:428813-430647	Col0Mockb_dir	dek2_1Mocka_dir	OK	7.03416	5.61261	-0.325707	-0.90558	0.1579	0.512629	no	NAC003	NAC domain containing protein 3
AT1G02230	AT1G02230	-	1:435173-436776	Col0Mockb_dir	dek2_1Mocka_dir	NOTEST	0.191975	0.228099	0.248742	0	1	1	no	NAC004	NAC domain containing protein 4
AT1G02250	AT1G02250	-	1:437950-439559	Col0Mockb_dir	dek2_1Mocka_dir	NOTEST	0.022859	0.0312323	0.450277	0	1	1	no	NAC005	NAC domain containing protein 5
AT1G02260	AT1G02260	-	1:440440-442877	Col0Mockb_dir	dek2_1Mocka_dir	OK	8.53475	6.50246	-0.392362	-1.28533	0.0465	0.304684	no	AT1G02260	Divalent ion symporter
AT1G02270	AT1G02270	-	1:443148-446235	Col0Mockb_dir	dek2_1Mocka_dir	OK	7.21889	6.58623	-0.132323	-0.430623	0.50405	0.806262	no	AT1G02270	Calcium-binding endonuclease/exonuclease/phosphatase family
AT1G02280	AT1G02280	-	1:448462-450426	Col0Mockb_dir	dek2_1Mocka_dir	OK	32.8029	27.9273	-0.232147	-0.880625	0.17335	0.533181	no	TOC33	translocon at the outer envelope membrane of chloroplasts 33
AT1G02290	AT1G02290	-	1:450526-452737	Col0Mockb_dir	dek2_1Mocka_dir	OK	5.16662	4.47938	-0.205922	-0.551791	0.3855	0.73072	no	AT1G02290	hypothetical protein
AT1G02300	AT1G02300	-	1:453287-455463	Col0Mockb_dir	dek2_1Mocka_dir	OK	4.20686	4.39954	0.0646094	0.162617	0.80265	0.936548	no	AT1G02300	Cysteine proteinases superfamily protein
AT1G02305	AT1G02305	-	1:455687-460696	Col0Mockb_dir	dek2_1Mocka_dir	OK	12.6218	12.8278	0.0233579	0.0793224	0.9043	0.969831	no	AT1G02305	Cysteine proteinases superfamily protein
AT1G02310	AT1G02310	-	1:455687-460696	Col0Mockb_dir	dek2_1Mocka_dir	OK	1.4543	1.38681	-0.0685601	-0.0777729	0.9043	0.969831	no	MAN1	Glycosyl hydrolase superfamily protein
AT1G02320	AT1G02320	-	1:461827-461974	Col0Mockb_dir	dek2_1Mocka_dir	NOTEST	0	2.51083	inf	0	1	1	no	AT1G02320	hypothetical protein
AT1G02330	AT1G02330	-	1:462074-463612	Col0Mockb_dir	dek2_1Mocka_dir	OK	12.9522	13.1174	0.0182889	0.063745	0.9225	0.975904	no	AT1G02330	integrator complex subunit-like protein
AT1G02335	AT1G02335	-	1:463854-464924	Col0Mockb_dir	dek2_1Mocka_dir	OK	8.64715	11.3948	0.398074	1.05143	0.1155	0.451072	no	GL22	germin-like protein subfamily 2 member 2 precursor
AT1G02340	AT1G02340	-	1:465717-467844	Col0Mockb_dir	dek2_1Mocka_dir	OK	1.19526	0.895753	-0.416157	-0.572365	0.37405	0.72297	no	HFR1	basic helix-loop-helix (bHLH) DNA-binding superfamily protein
AT1G02350	AT1G02350	-	1:469817-470693	Col0Mockb_dir	dek2_1Mocka_dir	OK	1.87525	2.30733	0.299141	0.351806	0.5598	0.834135	no	AT1G02350	protoporphyrinogen oxidase-like protein
AT1G02360	AT1G02360	-	1:471989-473160	Col0Mockb_dir	dek2_1Mocka_dir	OK	14.9451	20.2652	0.439337	1.4496	0.02605	0.22338	no	AT1G02360	Chitinase family protein
AT1G02370	AT1G02370	-	1:474499-476511	Col0Mockb_dir	dek2_1Mocka_dir	OK	4.4103	5.48334	0.314177	0.867086	0.17805	0.54032	no	AT1G02370	Tetratricopeptide repeat (TPR)-like superfamily protein
AT1G02380	AT1G02380	-	1:476999-478971	Col0Mockb_dir	dek2_1Mocka_dir	OK	0.832051	1.96335	1.23857	1.77434	0.00855	0.1274	no	AT1G02380	transmembrane protein
AT1G02390	AT1G02390	-	1:480851-483292	Col0Mockb_dir	dek2_1Mocka_dir	OK	0.672054	0.568867	-0.240487	-0.307416	0.64975	0.877885	no	GPAT2	glycerol-3-phosphate acyltransferase 2
AT1G02391	AT1G02391	-	1:483763-483919	Col0Mockb_dir	dek2_1Mocka_dir	NOTEST	0	0	0	0	1	1	no
AT1G02400	AT1G02400	-	1:486800-489577	Col0Mockb_dir	dek2_1Mocka_dir	OK	2.863	2.0798	-0.461081	-1.03074	0.1046	0.432568	no	GA2OX6	gibberellin 2-oxidase 6
AT1G02405	AT1G02405	-	1:489978-490505	Col0Mockb_dir	dek2_1Mocka_dir	OK	0.523087	0.167242	-1.64512	-0.939134	0.27375	0.642391	no	AT1G02405	proline-rich family protein
AT1G02410	AT1G02410	-	1:490924-492926	Col0Mockb_dir	dek2_1Mocka_dir	OK	6.25644	5.32782	-0.231795	-0.630036	0.3339	0.690548	no	AT1G02410	cytochrome c oxidase assembly protein CtaG / Cox11 family
AT1G02420	AT1G02420	-	1:493682-496062	Col0Mockb_dir	dek2_1Mocka_dir	OK	1.10641	0.846069	-0.387033	-0.407968	0.5286	0.819494	no	AT1G02420	Pentatricopeptide repeat (PPR) superfamily protein
AT1G02430	AT1G02430	-	1:493682-496062	Col0Mockb_dir	dek2_1Mocka_dir	OK	6.67763	4.03626	-0.726319	-1.39516	0.03395	0.258838	no	ARFD1B	ADP-ribosylation factor D1B
AT1G02440	AT1G02440	-	1:496585-497479	Col0Mockb_dir	dek2_1Mocka_dir	NOTEST	0.470446	0.16434	-1.51735	0	1	1	no	ARFD1A	ADP-ribosylation factor D1A
AT1G02450	AT1G02450	-	1:497975-498516	Col0Mockb_dir	dek2_1Mocka_dir	OK	1.24889	0.53319	-1.22792	-0.932745	0.26315	0.632023	no	NIMIN1	NIM1-interacting 1
AT1G02460	AT1G02460	-	1:504672-507204	Col0Mockb_dir	dek2_1Mocka_dir	OK	0.549707	1.45521	1.40449	1.97977	0.00625	0.105688	no	AT1G02460	Pectin lyase-like superfamily protein
AT1G02470	AT1G02470	-	1:511764-513624	Col0Mockb_dir	dek2_1Mocka_dir	OK	0.660038	0.610697	-0.112093	-0.118226	0.86775	0.958892	no	AT1G02470	Polyketide cyclase/dehydrase and lipid transport superfamily protein
AT1G02475	AT1G02475	-	1:513842-515404	Col0Mockb_dir	dek2_1Mocka_dir	OK	1.39866	3.24181	1.21275	1.98391	0.0149	0.173619	no	AT1G02475	Polyketide cyclase/dehydrase and lipid transport superfamily protein
AT1G02490	AT1G02490	-	1:516617-516734	Col0Mockb_dir	dek2_1Mocka_dir	NOTEST	0	5.92643	inf	0	1	1	no	AT1G02490	hypothetical protein
AT1G02500	AT1G02500	-	1:518250-520437	Col0Mockb_dir	dek2_1Mocka_dir	OK	442.01	330.151	-0.420952	-1.48072	0.02245	0.208276	no	SAM1	S-adenosylmethionine synthetase 1
AT1G02510	AT1G02510	-	1:520497-521668	Col0Mockb_dir	dek2_1Mocka_dir	NOTEST	0	0.00954025	inf	0	1	1	no	TPK4	Outward rectifying potassium channel protein
AT1G02520	AT1G02520	-	1:523650-528745	Col0Mockb_dir	dek2_1Mocka_dir	OK	1.5278	2.42978	0.669374	1.8442	0.0042	0.0834849	no	ABCB11	P-glycoprotein 11
AT1G02530	AT1G02530	-	1:529794-534677	Col0Mockb_dir	dek2_1Mocka_dir	NOTEST	0.0537069	0.0543532	0.0172582	0	1	1	no	ABCB12	P-glycoprotein 12
AT1G02540	AT1G02540	-	1:534826-535699	Col0Mockb_dir	dek2_1Mocka_dir	NOTEST	0	0	0	0	1	1	no	AT1G02540	hypothetical protein
AT1G02550	AT1G02550	-	1:536482-537211	Col0Mockb_dir	dek2_1Mocka_dir	NOTEST	0	0	0	0	1	1	no	AT1G02550	Plant invertase/pectin methylesterase inhibitor superfamily protein
AT1G02560	AT1G02560	-	1:537859-540109	Col0Mockb_dir	dek2_1Mocka_dir	OK	169.161	136.431	-0.310218	-1.21157	0.07255	0.365763	no	CLPP5	nuclear encoded CLP protease 5
AT1G02570	AT1G02570	-	1:541334-542240	Col0Mockb_dir	dek2_1Mocka_dir	OK	0	0.812524	inf	#NAME?	5e-05	0.00323653	yes	AT1G02570	transmembrane protein
AT1G02575	AT1G02575	-	1:543109-544007	Col0Mockb_dir	dek2_1Mocka_dir	NOTEST	0	0.410592	inf	0	1	1	no	AT1G02575	transmembrane protein
AT1G02580	AT1G02580	-	1:544782-549202	Col0Mockb_dir	dek2_1Mocka_dir	NOTEST	0.0249416	0.0166242	-0.585267	0	1	1	no	MEA	SET domain-containing protein
AT1G02590	AT1G02590	-	1:552137-552761	Col0Mockb_dir	dek2_1Mocka_dir	NOTEST	0	0	0	0	1	1	no	AT1G02590	Aldehyde oxidase/xanthine dehydrogenase, molybdopterin binding protein
AT1G02610	AT1G02610	-	1:553049-555994	Col0Mockb_dir	dek2_1Mocka_dir	OK	0.897821	1.75677	0.96843	1.6268	0.02385	0.214092	no	AT1G02610	RING/FYVE/PHD zinc finger superfamily protein
AT1G02620	AT1G02620	-	1:557091-557986	Col0Mockb_dir	dek2_1Mocka_dir	NOTEST	0	0.193512	inf	0	1	1	no	AT1G02620	Ras-related small GTP-binding family protein
AT1G02630	AT1G02630	-	1:560609-562424	Col0Mockb_dir	dek2_1Mocka_dir	NOTEST	0.0170274	0.0508941	1.57964	0	1	1	no	AT1G02630	Nucleoside transporter family protein
AT1G02640	AT1G02640	-	1:564204-567769	Col0Mockb_dir	dek2_1Mocka_dir	OK	3.90172	5.96066	0.611362	1.97752	0.00285	0.0650864	no	BXL2	beta-xylosidase 2
AT1G02650	AT1G02650	-	1:568703-570418	Col0Mockb_dir	dek2_1Mocka_dir	OK	0.836179	0.770216	-0.118549	-0.156868	0.81455	0.940802	no	AT1G02650	Tetratricopeptide repeat (TPR)-like superfamily protein
AT1G02660	AT1G02660	-	1:571954-574981	Col0Mockb_dir	dek2_1Mocka_dir	OK	0.784973	5.06607	2.69015	5.47394	5e-05	0.00323653	yes	AT1G02660	alpha/beta-Hydrolases superfamily protein
AT1G02670	AT1G02670	-	1:576045-580299	Col0Mockb_dir	dek2_1Mocka_dir	NOTEST	0.111575	0.242864	1.12214	0	1	1	no	AT1G02670	P-loop containing nucleoside triphosphate hydrolases superfamily protein
AT1G02680	AT1G02680	-	1:580624-582310	Col0Mockb_dir	dek2_1Mocka_dir	OK	8.92197	8.25566	-0.111979	-0.329332	0.60315	0.856277	no	TAF13	TBP-associated factor 13
AT1G02690	AT1G02690	-	1:584259-587219	Col0Mockb_dir	dek2_1Mocka_dir	OK	10.9732	9.5824	-0.19552	-0.69009	0.2813	0.649944	no	IMPA-6	importin alpha isoform 6
AT1G02700	AT1G02700	-	1:588328-589480	Col0Mockb_dir	dek2_1Mocka_dir	OK	0.681021	0.463869	-0.553982	-0.493064	0.42775	0.763089	no	AT1G02700	GATA transcription factor-like protein
AT1G02710	AT1G02710	-	1:589705-589996	Col0Mockb_dir	dek2_1Mocka_dir	OK	11.531	10.1612	-0.182445	-0.346926	0.69665	0.89759	no	AT1G02710	glycine-rich protein
AT1G02720	AT1G02720	-	1:591825-594236	Col0Mockb_dir	dek2_1Mocka_dir	OK	5.10571	4.91611	-0.0545953	-0.15963	0.8074	0.9384	no	GATL5	galacturonosyltransferase 5
AT1G02730	AT1G02730	-	1:594572-598657	Col0Mockb_dir	dek2_1Mocka_dir	OK	9.71388	10.3014	0.0847214	0.317817	0.63095	0.870235	no	CSLD5	cellulose synthase-like D5
AT1G02740	AT1G02740	-	1:599415-602038	Col0Mockb_dir	dek2_1Mocka_dir	OK	1.09972	0.926092	-0.247905	-0.375723	0.54895	0.82906	no	AT1G02740	MRG family protein
AT1G02750	AT1G02750	-	1:602496-604292	Col0Mockb_dir	dek2_1Mocka_dir	OK	12.9	13.0525	0.0169548	0.0553378	0.9299	0.978333	no	AT1G02750	Drought-responsive family protein
AT1G02770	AT1G02770	-	1:604872-606693	Col0Mockb_dir	dek2_1Mocka_dir	NOTEST	0.288851	0.485804	0.750048	0	1	1	no	AT1G02770	hypothetical protein
AT1G02780	AT1G02780	-	1:607807-609465	Col0Mockb_dir	dek2_1Mocka_dir	OK	199.375	259.207	0.378618	1.41299	0.0306	0.243445	no	emb2386	Ribosomal protein L19e family protein
AT1G02790	AT1G02790	-	1:610390-612324	Col0Mockb_dir	dek2_1Mocka_dir	NOTEST	0	0	0	0	1	1	no	PGA4	polygalacturonase 4
AT1G02800	AT1G02800	-	1:613215-616191	Col0Mockb_dir	dek2_1Mocka_dir	OK	1.6969	1.59832	-0.0863447	-0.176982	0.7945	0.93462	no	CEL2	cellulase 2
AT1G02810	AT1G02810	-	1:618264-620480	Col0Mockb_dir	dek2_1Mocka_dir	OK	4.35599	3.08965	-0.495556	-1.35044	0.04715	0.305006	no	AT1G02810	Plant invertase/pectin methylesterase inhibitor superfamily
AT1G02813	AT1G02813	-	1:620677-621289	Col0Mockb_dir	dek2_1Mocka_dir	OK	0.759428	0.387422	-0.971008	-0.616384	0.38765	0.732497	no	AT1G02813	pectinesterase (Protein of unknown function, DUF538)
AT1G02816	AT1G02816	-	1:621460-622469	Col0Mockb_dir	dek2_1Mocka_dir	OK	22.434	28.3779	0.339079	1.14569	0.081	0.386154	no	AT1G02816	pectinesterase (Protein of unknown function, DUF538)
AT1G02820	AT1G02820	-	1:623764-624475	Col0Mockb_dir	dek2_1Mocka_dir	OK	102.145	59.8005	-0.772389	-3.09551	5e-05	0.00323653	yes	LEA3	Late embryogenesis abundant 3 (LEA3) family protein
AT1G02830	AT1G02830	-	1:625144-625608	Col0Mockb_dir	dek2_1Mocka_dir	NOTEST	0	0.0704268	inf	0	1	1	no	AT1G02830	Ribosomal L22e protein family
AT1G02840	AT1G02840	-	1:626740-629819	Col0Mockb_dir	dek2_1Mocka_dir	OK	11.588	11.3696	-0.0274407	-0.100298	0.8768	0.96027	no	SR34	RNA-binding (RRM/RBD/RNP motifs) family protein
AT1G02850	AT1G02850	-	1:630504-633259	Col0Mockb_dir	dek2_1Mocka_dir	OK	6.2888	7.78871	0.308599	0.988809	0.13105	0.47643	no	BGLU11	beta glucosidase 11
AT1G02860	AT1G02860	-	1:635143-638677	Col0Mockb_dir	dek2_1Mocka_dir	OK	2.26262	2.40891	0.0903904	0.135329	0.83575	0.948789	no	NLA	SPX (SYG1/Pho81/XPR1) domain-containing protein
AT1G02870	AT1G02870	-	1:635143-638677	Col0Mockb_dir	dek2_1Mocka_dir	OK	11.9519	12.4642	0.0605454	0.176588	0.78425	0.931094	no	AT1G02870	nucleolar-like protein
AT1G02880	AT1G02880	-	1:642751-644903	Col0Mockb_dir	dek2_1Mocka_dir	OK	16.8271	14.8204	-0.183207	-0.65632	0.32195	0.683569	no	TPK1	thiamin pyrophosphokinase1
AT1G02890	AT1G02890	-	1:645091-651907	Col0Mockb_dir	dek2_1Mocka_dir	OK	2.44089	2.54594	0.0607921	0.192955	0.7607	0.923972	no	AT1G02890	AAA-type ATPase family protein
AT1G02900	AT1G02900	-	1:653764-654343	Col0Mockb_dir	dek2_1Mocka_dir	OK	69.9107	68.5535	-0.0282816	-0.107314	0.8758	0.96009	no	RALF1	rapid alkalinization factor 1
AT1G02910	AT1G02910	-	1:655576-658148	Col0Mockb_dir	dek2_1Mocka_dir	OK	11.1764	10.3725	-0.107691	-0.382485	0.5619	0.835578	no	LPA1	tetratricopeptide repeat (TPR)-containing protein
AT1G02920	AT1G02920	-	1:658656-659771	Col0Mockb_dir	dek2_1Mocka_dir	OK	10.5751	21.2608	1.00752	2.97122	5e-05	0.00323653	yes	GSTF7	glutathione S-transferase 7
AT1G02930	AT1G02930	-	1:661176-662456	Col0Mockb_dir	dek2_1Mocka_dir	OK	51.5952	80.9885	0.650481	2.4852	0.00035	0.015269	yes	GSTF6	glutathione S-transferase 6
AT1G02940	AT1G02940	-	1:663078-664128	Col0Mockb_dir	dek2_1Mocka_dir	OK	0.634222	1.38719	1.1291	1.09035	0.09185	0.407027	no	GSTF5	glutathione S-transferase (class phi) 5
AT1G02950	AT1G02950	-	1:665151-666452	Col0Mockb_dir	dek2_1Mocka_dir	OK	13.9763	14.3707	0.0401478	0.124312	0.8435	0.951557	no	GSTF4	glutathione S-transferase F4
AT1G02960	AT1G02960	-	1:666871-669837	Col0Mockb_dir	dek2_1Mocka_dir	OK	3.18091	2.99366	-0.0875316	-0.224881	0.7292	0.911224	no	AT1G02960	kinetochore protein
AT1G02965	AT1G02965	-	1:671660-672814	Col0Mockb_dir	dek2_1Mocka_dir	NOTEST	0	0	0	0	1	1	no	AT1G02965	hypothetical protein
AT1G02970	AT1G02970	-	1:673305-676378	Col0Mockb_dir	dek2_1Mocka_dir	OK	1.44822	0.986333	-0.554134	-0.983747	0.12895	0.472895	no	WEE1	WEE1-like kinase
AT1G02980	AT1G02980	-	1:677868-681310	Col0Mockb_dir	dek2_1Mocka_dir	NOTEST	0.0851329	0.0460269	-0.887238	0	1	1	no	CUL2	cullin 2
AT1G02990	AT1G02990	-	1:681395-687315	Col0Mockb_dir	dek2_1Mocka_dir	OK	2.66678	2.8444	0.0930228	0.29194	0.64565	0.876645	no	AT1G02990	hypothetical protein
AT1G03000	AT1G03000	-	1:687889-692560	Col0Mockb_dir	dek2_1Mocka_dir	OK	2.48841	2.57267	0.0480429	0.136164	0.83245	0.947568	no	PEX6	peroxin 6
AT1G03010	AT1G03010	-	1:693479-696382	Col0Mockb_dir	dek2_1Mocka_dir	OK	0.339204	0.522229	0.622529	0.666073	0.29145	0.658803	no	AT1G03010	Phototropic-responsive NPH3 family protein
AT1G03020	AT1G03020	-	1:698206-698515	Col0Mockb_dir	dek2_1Mocka_dir	OK	0.348398	1.21868	1.80651	0.951069	0.3064	0.670917	no	AT1G03020	Thioredoxin superfamily protein
AT1G03022	AT1G03022	-	1:699120-699246	Col0Mockb_dir	dek2_1Mocka_dir	NOTEST	0	0	0	0	1	1	no
AT1G03030	AT1G03030	-	1:701477-703864	Col0Mockb_dir	dek2_1Mocka_dir	OK	4.33171	3.20265	-0.43567	-1.09374	0.0929	0.408502	no	AT1G03030	P-loop containing nucleoside triphosphate hydrolases superfamily protein
AT1G03040	AT1G03040	-	1:703905-706631	Col0Mockb_dir	dek2_1Mocka_dir	OK	21.022	18.8379	-0.158262	-0.606153	0.34785	0.701577	no	AT1G03040	basic helix-loop-helix (bHLH) DNA-binding superfamily protein
AT1G03050	AT1G03050	-	1:707725-711803	Col0Mockb_dir	dek2_1Mocka_dir	NOTEST	0.0167401	0.0466191	1.47762	0	1	1	no	AT1G03050	ENTH/ANTH/VHS superfamily protein
AT1G03055	AT1G03055	-	1:707725-711803	Col0Mockb_dir	dek2_1Mocka_dir	OK	1.59662	1.71094	0.0997687	0.157247	0.8014	0.936164	no	D27	beta-carotene isomerase D27-like protein
AT1G03060	AT1G03060	-	1:712472-726891	Col0Mockb_dir	dek2_1Mocka_dir	OK	3.89983	3.63281	-0.102327	-0.392125	0.54535	0.826641	no	SPI	BEACH-DOMAIN HOMOLOG A1
AT1G03070	AT1G03070	-	1:729900-731557	Col0Mockb_dir	dek2_1Mocka_dir	OK	0.317697	0.581518	0.872172	0.780569	0.2585	0.627889	no	AT1G03070	Bax inhibitor-1 family protein
AT1G03080	AT1G03080	-	1:731610-738056	Col0Mockb_dir	dek2_1Mocka_dir	OK	14.1346	11.8933	-0.249079	-1.00295	0.1373	0.487854	no	NET1D	kinase interacting (KIP1-like) family protein
AT1G03090	AT1G03090	-	1:739678-746479	Col0Mockb_dir	dek2_1Mocka_dir	OK	2.32054	1.9895	-0.222057	-0.562829	0.38625	0.731516	no	MCCA	methylcrotonyl-CoA carboxylase alpha chain
AT1G03100	AT1G03100	-	1:739678-746479	Col0Mockb_dir	dek2_1Mocka_dir	OK	0.922948	1.13658	0.300383	0.400555	0.5398	0.825243	no	AT1G03100	Pentatricopeptide repeat (PPR) superfamily protein
AT1G03103	AT1G03103	-	1:747196-748057	Col0Mockb_dir	dek2_1Mocka_dir	NOTEST	0	0	0	0	1	1	no	AT1G03103	Bifunctional inhibitor/lipid-transfer protein/seed storage 2S albumin superfamily protein
AT1G03106	AT1G03106	-	1:748101-749034	Col0Mockb_dir	dek2_1Mocka_dir	OK	0.981338	0.233058	-2.07406	-1.28191	0.05215	0.316126	no	AT1G03106	hypothetical protein
AT1G03110	AT1G03110	-	1:749245-751963	Col0Mockb_dir	dek2_1Mocka_dir	OK	5.88711	7.92351	0.42858	1.34311	0.041	0.286311	no	TRM82	Transducin/WD40 repeat-like superfamily protein
AT1G03120	AT1G03120	-	1:752270-753140	Col0Mockb_dir	dek2_1Mocka_dir	OK	0.294895	0.577603	0.969874	0.711575	0.2978	0.664567	no	RAB28	responsive to abscisic acid 28
AT1G03130	AT1G03130	-	1:753306-754198	Col0Mockb_dir	dek2_1Mocka_dir	OK	1217.23	978.422	-0.315072	-1.19997	0.08725	0.399106	no	PSAD-2	photosystem I subunit D-2
AT1G03140	AT1G03140	-	1:754370-756303	Col0Mockb_dir	dek2_1Mocka_dir	OK	27.1754	24.7944	-0.132291	-0.519734	0.4332	0.766338	no	AT1G03140	splicing factor Prp18 family protein
AT1G03150	AT1G03150	-	1:756413-758612	Col0Mockb_dir	dek2_1Mocka_dir	OK	4.75029	5.15573	0.118162	0.30292	0.64305	0.87628	no	AT1G03150	Acyl-CoA N-acyltransferases (NAT) superfamily protein
AT1G03160	AT1G03160	-	1:761281-766158	Col0Mockb_dir	dek2_1Mocka_dir	OK	6.74034	6.38106	-0.0790255	-0.287556	0.66095	0.88196	no	FZL	FZO-like protein
AT1G03170	AT1G03170	-	1:769631-770684	Col0Mockb_dir	dek2_1Mocka_dir	OK	1.75729	0.45485	-1.94989	-1.9776	0.005	0.0929897	no	FAF2	FANTASTIC four-like protein (DUF3049)
AT1G03180	AT1G03180	-	1:773410-775344	Col0Mockb_dir	dek2_1Mocka_dir	OK	1.20964	1.21727	0.00906162	0.0131007	0.98335	0.994625	no	AT1G03180	non-structural protein
AT1G03190	AT1G03190	-	1:775526-780062	Col0Mockb_dir	dek2_1Mocka_dir	OK	1.48531	1.57218	0.0820058	0.191395	0.7667	0.92534	no	UVH6	RAD3-like DNA-binding helicase protein
AT1G03200	AT1G03200	-	1:780601-781285	Col0Mockb_dir	dek2_1Mocka_dir	NOTEST	0.0855637	0.296581	1.79335	0	1	1	no	AT1G03200	hypothetical protein
AT1G03210	AT1G03210	-	1:782947-784240	Col0Mockb_dir	dek2_1Mocka_dir	OK	8.65916	8.23365	-0.072695	-0.194834	0.7609	0.924003	no	AT1G03210	Phenazine biosynthesis PhzC/PhzF protein
AT1G03220	AT1G03220	-	1:787121-788651	Col0Mockb_dir	dek2_1Mocka_dir	OK	76.1889	101.785	0.417878	1.76389	0.0129	0.159645	no	AT1G03220	Eukaryotic aspartyl protease family protein
AT1G03230	AT1G03230	-	1:790090-791592	Col0Mockb_dir	dek2_1Mocka_dir	OK	19.7555	20.5253	0.0551477	0.218342	0.7578	0.923318	no	AT1G03230	Eukaryotic aspartyl protease family protein
AT1G03240	AT1G03240	-	1:792221-792986	Col0Mockb_dir	dek2_1Mocka_dir	NOTEST	0	0.067156	inf	0	1	1	no	AT1G03240	hypothetical protein
AT1G03250	AT1G03250	-	1:793352-795376	Col0Mockb_dir	dek2_1Mocka_dir	OK	17.1391	15.5359	-0.141685	-0.5073	0.43335	0.766338	no	AT1G03250	R3H domain protein
AT1G03260	AT1G03260	-	1:795531-798463	Col0Mockb_dir	dek2_1Mocka_dir	OK	3.85163	3.26375	-0.238939	-0.643043	0.3259	0.685315	no	AT1G03260	SNARE associated Golgi protein family
AT1G03270	AT1G03270	-	1:799190-802436	Col0Mockb_dir	dek2_1Mocka_dir	OK	0.989344	0.756238	-0.387632	-0.618795	0.3402	0.695791	no	AT1G03270	CBS domain protein with a domain protein (DUF21)
AT1G03280	AT1G03280	-	1:803034-807066	Col0Mockb_dir	dek2_1Mocka_dir	OK	7.22944	5.97971	-0.273809	-0.951744	0.13775	0.488412	no	AT1G03280	Transcription factor TFIIE, alpha subunit
AT1G03290	AT1G03290	-	1:807360-810868	Col0Mockb_dir	dek2_1Mocka_dir	OK	9.18844	7.17302	-0.357238	-1.2435	0.05015	0.312176	no	AT1G03290	ELKS/Rab6-interacting/CAST family protein
AT1G03300	AT1G03300	-	1:811032-813086	Col0Mockb_dir	dek2_1Mocka_dir	OK	1.96099	2.22375	0.18141	0.39365	0.55335	0.830984	no	ATDUF1	agenet domain protein (DOMAIN OF UNKNOWN FUNCTION 724 1)
AT1G03310	AT1G03310	-	1:813470-816749	Col0Mockb_dir	dek2_1Mocka_dir	OK	29.9819	22.5486	-0.411052	-1.59366	0.0133	0.161487	no	DBE1	debranching enzyme 1
AT1G03320	AT1G03320	-	1:817026-817767	Col0Mockb_dir	dek2_1Mocka_dir	OK	1.63937	0.927451	-0.821802	-0.87736	0.19585	0.562109	no	AT1G03320	hypothetical protein
AT1G03330	AT1G03330	-	1:817982-819563	Col0Mockb_dir	dek2_1Mocka_dir	OK	31.7706	33.2448	0.0654349	0.247197	0.7098	0.903379	no	LSM2	Small nuclear ribonucleoprotein family protein
AT1G03340	AT1G03340	-	1:819661-821317	Col0Mockb_dir	dek2_1Mocka_dir	OK	1.45551	1.85112	0.346877	0.537068	0.4073	0.748902	no	AT1G03340	hypothetical protein
AT1G03350	AT1G03350	-	1:822637-824393	Col0Mockb_dir	dek2_1Mocka_dir	OK	16.1246	16.7563	0.0554457	0.210336	0.75405	0.921795	no	AT1G03350	BSD domain-containing protein
AT1G03360	AT1G03360	-	1:824536-826358	Col0Mockb_dir	dek2_1Mocka_dir	OK	10.7791	12.6407	0.229843	0.752737	0.23515	0.603033	no	RRP4	ribosomal RNA processing 4
AT1G03365	AT1G03365	-	1:826568-830383	Col0Mockb_dir	dek2_1Mocka_dir	OK	6.07468	5.81559	-0.0628824	-0.215774	0.74055	0.916642	no	AT1G03365	RING/U-box superfamily protein
AT1G03370	AT1G03370	-	1:830626-835361	Col0Mockb_dir	dek2_1Mocka_dir	OK	3.51748	3.60641	0.0360236	0.117206	0.85615	0.955556	no	AT1G03370	C2 calcium/lipid-binding and GRAM domain containing protein
AT1G03380	AT1G03380	-	1:835784-840940	Col0Mockb_dir	dek2_1Mocka_dir	OK	6.91991	5.61656	-0.301065	-1.08794	0.093	0.408851	no	ATG18G	yeast autophagy 18 G-like protein
AT1G03390	AT1G03390	-	1:841032-842418	Col0Mockb_dir	dek2_1Mocka_dir	NOTEST	0.0780788	0.0469917	-0.732525	0	1	1	no	AT1G03390	HXXXD-type acyl-transferase family protein
AT1G03400	AT1G03400	-	1:842746-844190	Col0Mockb_dir	dek2_1Mocka_dir	OK	7.61421	9.91232	0.380528	1.16302	0.08425	0.393108	no	AT1G03400	2-oxoglutarate (2OG) and Fe(II)-dependent oxygenase superfamily protein
AT1G03410	AT1G03410	-	1:844435-847683	Col0Mockb_dir	dek2_1Mocka_dir	OK	17.6404	14.4691	-0.28591	-1.1277	0.0902	0.405026	no	2A6	2-oxoglutarate (2OG) and Fe(II)-dependent oxygenase superfamily protein
AT1G03430	AT1G03430	-	1:847872-849500	Col0Mockb_dir	dek2_1Mocka_dir	OK	6.60752	6.60343	-0.000893062	-0.00227573	0.9975	0.998652	no	AHP5	histidine-containing phosphotransfer factor 5
AT1G03440	AT1G03440	-	1:852365-854032	Col0Mockb_dir	dek2_1Mocka_dir	OK	16.1935	11.8236	-0.453749	-1.69153	0.0175	0.186576	no	AT1G03440	Leucine-rich repeat (LRR) family protein
AT1G03445	AT1G03445	-	1:854409-859701	Col0Mockb_dir	dek2_1Mocka_dir	NOTEST	0.246785	0.153861	-0.681622	0	1	1	no	BSU1	Serine/threonine protein phosphatase family protein
AT1G03457	AT1G03457	-	1:860787-864125	Col0Mockb_dir	dek2_1Mocka_dir	OK	3.11929	2.77538	-0.168533	-0.449109	0.47835	0.792493	no	AT1G03457	RNA-binding (RRM/RBD/RNP motifs) family protein
AT1G03470	AT1G03470	-	1:865914-867733	Col0Mockb_dir	dek2_1Mocka_dir	OK	5.53597	5.55245	0.00428727	0.0116623	0.98395	0.994727	no	NET3A	Kinase interacting (KIP1-like) family protein
AT1G03475	AT1G03475	-	1:869050-871211	Col0Mockb_dir	dek2_1Mocka_dir	OK	69.9221	59.2569	-0.238765	-0.911696	0.1567	0.510812	no	LIN2	Coproporphyrinogen III oxidase
AT1G03490	AT1G03490	-	1:871873-872906	Col0Mockb_dir	dek2_1Mocka_dir	NOTEST	0	0	0	0	1	1	no	NAC006	NAC domain containing protein 6
AT1G03495	AT1G03495	-	1:873183-874935	Col0Mockb_dir	dek2_1Mocka_dir	OK	13.5241	10.3512	-0.385731	-1.34903	0.0464	0.304502	no	AT1G03495	HXXXD-type acyl-transferase family protein
AT1G03510	AT1G03510	-	1:876257-877547	Col0Mockb_dir	dek2_1Mocka_dir	OK	1.12517	0.956929	-0.23366	-0.279312	0.66725	0.885271	no	AT1G03510	Tetratricopeptide repeat (TPR)-like superfamily protein
AT1G03520	AT1G03520	-	1:877861-880158	Col0Mockb_dir	dek2_1Mocka_dir	OK	8.81615	8.83822	0.00360728	0.011679	0.9857	0.995235	no	AT1G03520	Core-2/I-branching beta-1,6-N-acetylglucosaminyltransferase family protein
AT1G03530	AT1G03530	-	1:880495-883391	Col0Mockb_dir	dek2_1Mocka_dir	OK	5.76838	5.88364	0.0285419	0.098911	0.88485	0.963217	no	NAF1	nuclear assembly factor 1
AT1G03540	AT1G03540	-	1:883781-885611	Col0Mockb_dir	dek2_1Mocka_dir	NOTEST	0.302931	0.260524	-0.217571	0	1	1	no	AT1G03540	Pentatricopeptide repeat (PPR-like) superfamily protein
AT1G03550	AT1G03550	-	1:885622-887956	Col0Mockb_dir	dek2_1Mocka_dir	OK	6.19373	4.13782	-0.581936	-1.5871	0.0159	0.179658	no	SCAMP4	Secretory carrier membrane protein (SCAMP) family protein
AT1G03560	AT1G03560	-	1:890155-892410	Col0Mockb_dir	dek2_1Mocka_dir	OK	5.84268	4.49256	-0.379093	-1.1149	0.0853	0.394721	no	AT1G03560	Pentatricopeptide repeat (PPR-like) superfamily protein
AT1G03590	AT1G03590	-	1:894253-897518	Col0Mockb_dir	dek2_1Mocka_dir	OK	8.38237	8.88708	0.0843509	0.2937	0.64495	0.876508	no	AT1G03590	Protein phosphatase 2C family protein
AT1G03600	AT1G03600	-	1:898875-899655	Col0Mockb_dir	dek2_1Mocka_dir	OK	1054.01	752.631	-0.485879	-1.92805	0.0062	0.105289	no	PSB27	photosystem II family protein
AT1G03610	AT1G03610	-	1:900886-903003	Col0Mockb_dir	dek2_1Mocka_dir	OK	14.4123	15.7791	0.13072	0.472952	0.46255	0.782243	no	AT1G03610	plant/protein (DUF789)
AT1G03620	AT1G03620	-	1:904318-906186	Col0Mockb_dir	dek2_1Mocka_dir	NOTEST	0.113017	0.209856	0.892859	0	1	1	no	AT1G03620	ELMO/CED-12 family protein
AT1G03630	AT1G03630	-	1:907641-909376	Col0Mockb_dir	dek2_1Mocka_dir	OK	99.5266	110.57	0.151809	0.586692	0.3699	0.718808	no	POR C	protochlorophyllide oxidoreductase C
AT1G03650	AT1G03650	-	1:910022-911193	Col0Mockb_dir	dek2_1Mocka_dir	OK	3.4937	2.69352	-0.375264	-0.665211	0.28765	0.655939	no	AT1G03650	Acyl-CoA N-acyltransferases (NAT) superfamily protein
AT1G03660	AT1G03660	-	1:911435-911759	Col0Mockb_dir	dek2_1Mocka_dir	OK	14.2781	10.6518	-0.422716	-0.553632	0.3817	0.727599	no	AT1G03660	Ankyrin-repeat containing protein
AT1G03670	AT1G03670	-	1:914221-916222	Col0Mockb_dir	dek2_1Mocka_dir	NOTEST	0	0.00643456	inf	0	1	1	no	AT1G03670	ankyrin repeat family protein
AT1G03680	AT1G03680	-	1:916818-918064	Col0Mockb_dir	dek2_1Mocka_dir	OK	438.096	368.57	-0.249306	-0.966875	0.15085	0.503515	no	THM1	thioredoxin M-type 1
AT1G03687	AT1G03687	-	1:918298-920507	Col0Mockb_dir	dek2_1Mocka_dir	OK	7.47456	6.34917	-0.235421	-0.72284	0.26265	0.631847	no	AT1G03687	DTW domain-containing protein
AT1G03700	AT1G03700	-	1:920949-921901	Col0Mockb_dir	dek2_1Mocka_dir	OK	3.2713	2.9598	-0.144366	-0.219218	0.73225	0.912543	no	AT1G03700	Uncharacterized protein family (UPF0497)
AT1G03710	AT1G03710	-	1:923425-924726	Col0Mockb_dir	dek2_1Mocka_dir	NOTEST	0.0625746	0.299985	2.26124	0	1	1	no	AT1G03710	Cystatin/monellin superfamily protein
AT1G03720	AT1G03720	-	1:924995-926373	Col0Mockb_dir	dek2_1Mocka_dir	NOTEST	0	0	0	0	1	1	no	AT1G03720	Cysteine proteinases superfamily protein
AT1G03730	AT1G03730	-	1:930827-931895	Col0Mockb_dir	dek2_1Mocka_dir	OK	9.89157	11.1838	0.177139	0.481171	0.46125	0.78137	no	AT1G03730	pyrroline-5-carboxylate reductase
AT1G03740	AT1G03740	-	1:933511-937043	Col0Mockb_dir	dek2_1Mocka_dir	OK	5.9405	5.42925	-0.129831	-0.436167	0.50235	0.805416	no	AT1G03740	Protein kinase superfamily protein
AT1G03750	AT1G03750	-	1:937919-943377	Col0Mockb_dir	dek2_1Mocka_dir	OK	2.71857	2.00544	-0.438928	-1.01403	0.113	0.446469	no	SWI2	switch 2
AT1G03760	AT1G03760	-	1:937919-943377	Col0Mockb_dir	dek2_1Mocka_dir	OK	1.55658	2.01452	0.37206	0.608862	0.3439	0.698536	no	AT1G03760	Prefoldin chaperone subunit family protein
AT1G03770	AT1G03770	-	1:944571-947483	Col0Mockb_dir	dek2_1Mocka_dir	OK	1.20641	0.852311	-0.501268	-0.874313	0.1911	0.55628	no	RING1B	RING 1B
AT1G03780	AT1G03780	-	1:947519-951827	Col0Mockb_dir	dek2_1Mocka_dir	OK	2.60528	2.37219	-0.135215	-0.383757	0.54015	0.825398	no	TPX2	targeting protein for XKLP2
AT1G03790	AT1G03790	-	1:954524-956097	Col0Mockb_dir	dek2_1Mocka_dir	NOTEST	0	0.00570896	inf	0	1	1	no	SOM	Zinc finger C-x8-C-x5-C-x3-H type family protein
AT1G03800	AT1G03800	-	1:957260-957998	Col0Mockb_dir	dek2_1Mocka_dir	OK	1.85709	1.80297	-0.0426638	-0.0651807	0.9334	0.98005	no	ERF10	ERF domain protein 10
AT1G03810	AT1G03810	-	1:958758-959609	Col0Mockb_dir	dek2_1Mocka_dir	NOTEST	0	0	0	0	1	1	no	AT1G03810	Nucleic acid-binding, OB-fold-like protein
AT1G03820	AT1G03820	-	1:959868-960728	Col0Mockb_dir	dek2_1Mocka_dir	OK	41.48	38.0108	-0.126006	-0.467237	0.4873	0.797382	no	AT1G03820	E6-like protein
AT1G03830	AT1G03830	-	1:962015-966757	Col0Mockb_dir	dek2_1Mocka_dir	OK	1.84779	2.16937	0.231475	0.637586	0.3154	0.67745	no	AT1G03830	guanylate-binding family protein
AT1G03840	AT1G03840	-	1:967502-970130	Col0Mockb_dir	dek2_1Mocka_dir	OK	1.94239	2.36787	0.285758	0.624518	0.3288	0.687065	no	MGP	C2H2 and C2HC zinc fingers superfamily protein
AT1G03850	AT1G03850	-	1:976096-977761	Col0Mockb_dir	dek2_1Mocka_dir	OK	7.66825	12.941	0.75498	2.24775	0.0008	0.0270332	yes	GRXS13	Glutaredoxin family protein
AT1G03860	AT1G03860	-	1:979307-981885	Col0Mockb_dir	dek2_1Mocka_dir	OK	33.683	32.4969	-0.0517177	-0.200178	0.7506	0.920966	no	PHB2	prohibitin 2
AT1G03870	AT1G03870	-	1:982505-983540	Col0Mockb_dir	dek2_1Mocka_dir	OK	120.007	155.359	0.372479	1.50248	0.0268	0.22698	no	FLA9	FASCICLIN-like arabinoogalactan 9
AT1G03880	AT1G03880	-	1:985750-988146	Col0Mockb_dir	dek2_1Mocka_dir	NOTEST	0	0.00352712	inf	0	1	1	no	CRU2	cruciferin 2
AT1G03890	AT1G03890	-	1:989197-991020	Col0Mockb_dir	dek2_1Mocka_dir	NOTEST	0	0	0	0	1	1	no	AT1G03890	RmlC-like cupins superfamily protein
AT1G03900	AT1G03900	-	1:991138-993118	Col0Mockb_dir	dek2_1Mocka_dir	OK	33.102	30.6263	-0.112148	-0.438558	0.50795	0.809189	no	ABCI18	non-intrinsic ABC protein 4
AT1G03905	AT1G03905	-	1:993399-995784	Col0Mockb_dir	dek2_1Mocka_dir	OK	4.30888	4.11826	-0.0652763	-0.171886	0.78615	0.93178	no	ABCI19	P-loop containing nucleoside triphosphate hydrolases superfamily protein
AT1G03910	AT1G03910	-	1:996114-1000437	Col0Mockb_dir	dek2_1Mocka_dir	OK	8.09885	7.34916	-0.140138	-0.513652	0.4265	0.762134	no	AT1G03910	cactus-binding carboxy-terminal, cactin
AT1G03920	AT1G03920	-	1:1001320-1004383	Col0Mockb_dir	dek2_1Mocka_dir	OK	0.394214	0.857633	1.12138	1.47052	0.02665	0.226287	no	AT1G03920	Protein kinase family protein
AT1G03930	AT1G03930	-	1:1004768-1008370	Col0Mockb_dir	dek2_1Mocka_dir	OK	10.9569	10.1735	-0.107017	-0.393048	0.5429	0.826181	no	ADK1	dual specificity kinase 1
AT1G03940	AT1G03940	-	1:1009541-1011056	Col0Mockb_dir	dek2_1Mocka_dir	OK	12.2355	10.1708	-0.266634	-0.907384	0.1943	0.560503	no	AT1G03940	HXXXD-type acyl-transferase family protein
AT1G03950	AT1G03950	-	1:1011171-1013365	Col0Mockb_dir	dek2_1Mocka_dir	OK	1.74999	1.34051	-0.384567	-0.64376	0.31785	0.679268	no	VPS2.3	vacuolar protein sorting-associated protein 2.3
AT1G03960	AT1G03960	-	1:1013714-1017929	Col0Mockb_dir	dek2_1Mocka_dir	OK	2.52523	1.85221	-0.447166	-1.15111	0.08625	0.397267	no	AT1G03960	Calcium-binding EF hand family protein
AT1G03970	AT1G03970	-	1:1018099-1022108	Col0Mockb_dir	dek2_1Mocka_dir	OK	2.1507	2.05501	-0.0656626	-0.082077	0.9014	0.969321	no	GBF4	G-box binding factor 4
AT1G03980	AT1G03980	-	1:1018099-1022108	Col0Mockb_dir	dek2_1Mocka_dir	OK	5.45895	5.52869	0.0183154	0.0570868	0.92765	0.978039	no	PCS2	phytochelatin synthase 2
AT1G03982	AT1G03982	-	1:1022250-1023719	Col0Mockb_dir	dek2_1Mocka_dir	NOTEST	0.109228	0.0115445	-3.24207	0	1	1	no	AT1G03982	PAK-box/P21-Rho-binding family protein
AT1G03990	AT1G03990	-	1:1024846-1027616	Col0Mockb_dir	dek2_1Mocka_dir	OK	0.504065	1.12974	1.16431	1.81216	0.0091	0.131089	no	AT1G03990	Long-chain fatty alcohol dehydrogenase family protein
AT1G04000	AT1G04000	-	1:1028105-1029119	Col0Mockb_dir	dek2_1Mocka_dir	OK	29.0422	15.6803	-0.889196	-3.3098	5e-05	0.00323653	yes	AT1G04000	hypothetical protein
AT1G04010	AT1G04010	-	1:1031199-1036237	Col0Mockb_dir	dek2_1Mocka_dir	OK	0.742718	0.69447	-0.0969026	-0.172779	0.78845	0.932566	no	PSAT1	phospholipid sterol acyl transferase 1
AT1G04020	AT1G04020	-	1:1036536-1040224	Col0Mockb_dir	dek2_1Mocka_dir	OK	4.82964	4.3921	-0.137006	-0.4296	0.494	0.800786	no	BARD1	breast cancer associated RING 1
AT1G04030	AT1G04030	-	1:1040382-1043864	Col0Mockb_dir	dek2_1Mocka_dir	OK	2.02083	1.57006	-0.36413	-0.240467	0.70945	0.903379	no	AT1G04030	eisosome protein
AT1G04040	AT1G04040	-	1:1040382-1043864	Col0Mockb_dir	dek2_1Mocka_dir	OK	68.9096	88.5515	0.361812	1.38778	0.0343	0.259521	no	AT1G04040	HAD superfamily, subfamily IIIB acid phosphatase
AT1G04050	AT1G04050	-	1:1045597-1049297	Col0Mockb_dir	dek2_1Mocka_dir	OK	1.31395	1.3746	0.0650966	0.139083	0.8223	0.944203	no	SUVR1	histone-lysine N-methyltransferase SUVR2-like protein
AT1G04070	AT1G04070	-	1:1050552-1051186	Col0Mockb_dir	dek2_1Mocka_dir	OK	18.6262	18.8662	0.0184724	0.053253	0.9357	0.980194	no	TOM22-I	translocase of outer membrane 22-I
AT1G04080	AT1G04080	-	1:1051311-1056827	Col0Mockb_dir	dek2_1Mocka_dir	OK	14.0299	14.2479	0.0222425	0.086262	0.8931	0.966442	no	PRP39	Tetratricopeptide repeat (TPR)-like superfamily protein
AT1G04090	AT1G04090	-	1:1057150-1059419	Col0Mockb_dir	dek2_1Mocka_dir	OK	0.846813	0.735355	-0.203602	-0.280027	0.66705	0.885248	no	AT1G04090	vacuolar sorting-associated protein (DUF946)
AT1G04100	AT1G04100	-	1:1059505-1061191	Col0Mockb_dir	dek2_1Mocka_dir	OK	0.939191	1.54461	0.717749	0.984647	0.12745	0.470724	no	IAA10	indoleacetic acid-induced protein 10
AT1G04110	AT1G04110	-	1:1061456-1063784	Col0Mockb_dir	dek2_1Mocka_dir	OK	1.75483	2.39687	0.449821	0.99028	0.13835	0.489144	no	SDD1	Subtilase family protein
AT1G04120	AT1G04120	-	1:1064449-1071047	Col0Mockb_dir	dek2_1Mocka_dir	OK	7.4119	7.59501	0.0352081	0.1334	0.8314	0.947201	no	ABCC5	multidrug resistance-associated protein 5
AT1G04130	AT1G04130	-	1:1073426-1080630	Col0Mockb_dir	dek2_1Mocka_dir	OK	1.5343	1.66847	0.120939	0.10777	0.8721	0.959714	no	TPR2	Tetratricopeptide repeat (TPR)-like superfamily protein
AT1G04140	AT1G04140	-	1:1073426-1080630	Col0Mockb_dir	dek2_1Mocka_dir	OK	10.3252	9.96843	-0.0507348	-0.188551	0.7707	0.92669	no	AT1G04140	Transducin family protein / WD-40 repeat family protein
AT1G04150	AT1G04150	-	1:1081207-1084246	Col0Mockb_dir	dek2_1Mocka_dir	NOTEST	0.150833	0.0623487	-1.27452	0	1	1	no	AT1G04150	C2 calcium/lipid-binding plant phosphoribosyltransferase family protein
AT1G04160	AT1G04160	-	1:1086494-1096146	Col0Mockb_dir	dek2_1Mocka_dir	NOTEST	0.185823	0.203242	0.129271	0	1	1	no	XIB	myosin XI B
AT1G04170	AT1G04170	-	1:1096945-1099898	Col0Mockb_dir	dek2_1Mocka_dir	OK	78.1957	66.0741	-0.243004	-0.931396	0.147	0.499274	no	EIF2 GAMMA	eukaryotic translation initiation factor 2 gamma subunit
AT1G04171	AT1G04171	-	1:1100443-1100608	Col0Mockb_dir	dek2_1Mocka_dir	NOTEST	0	0	0	0	1	1	no
AT1G04180	AT1G04180	-	1:1104622-1105988	Col0Mockb_dir	dek2_1Mocka_dir	OK	0.83435	0.623722	-0.41975	-0.466543	0.4873	0.797382	no	YUC9	YUCCA 9
AT1G04190	AT1G04190	-	1:1106427-1108715	Col0Mockb_dir	dek2_1Mocka_dir	OK	6.48179	7.02987	0.117106	0.354671	0.5852	0.847594	no	TPR3	Tetratricopeptide repeat (TPR)-like superfamily protein
AT1G04200	AT1G04200	-	1:1109481-1114107	Col0Mockb_dir	dek2_1Mocka_dir	OK	3.209	3.20349	-0.00247843	-0.00740639	0.9917	0.997554	no	AT1G04200	dyggve-melchior-clausen syndrome protein
AT1G04210	AT1G04210	-	1:1114404-1122526	Col0Mockb_dir	dek2_1Mocka_dir	OK	9.91733	8.45089	-0.230848	-0.63761	0.3209	0.682139	no	AT1G04210	Leucine-rich repeat protein kinase family protein
AT1G04220	AT1G04220	-	1:1114404-1122526	Col0Mockb_dir	dek2_1Mocka_dir	OK	17.805	14.7926	-0.267409	-0.705729	0.28475	0.652915	no	KCS2	3-ketoacyl-CoA synthase 2
AT1G04230	AT1G04230	-	1:1125517-1128168	Col0Mockb_dir	dek2_1Mocka_dir	OK	3.15682	2.25514	-0.485252	-1.16337	0.0691	0.356423	no	AT1G04230	rRNA-processing EFG1-like protein (DUF2361)
AT1G04240	AT1G04240	-	1:1128187-1129551	Col0Mockb_dir	dek2_1Mocka_dir	OK	31.9345	35.2482	0.142434	0.527602	0.4167	0.75477	no	SHY2	AUX/IAA transcriptional regulator family protein
AT1G04250	AT1G04250	-	1:1136257-1138613	Col0Mockb_dir	dek2_1Mocka_dir	OK	14.0064	16.3575	0.223863	0.801505	0.2103	0.57831	no	AXR3	AUX/IAA transcriptional regulator family protein
AT1G04260	AT1G04260	-	1:1140527-1141365	Col0Mockb_dir	dek2_1Mocka_dir	OK	36.4483	29.0352	-0.328049	-1.18811	0.082	0.388229	no	MPI7	CAMV movement protein interacting protein 7
AT1G04270	AT1G04270	-	1:1141603-1143053	Col0Mockb_dir	dek2_1Mocka_dir	OK	579.018	564.224	-0.0373402	-0.133654	0.8338	0.948179	no	RPS15	cytosolic ribosomal protein S15
AT1G04280	AT1G04280	-	1:1143435-1146654	Col0Mockb_dir	dek2_1Mocka_dir	OK	10.9866	12.2404	0.155915	0.56616	0.3779	0.724677	no	AT1G04280	P-loop containing nucleoside triphosphate hydrolases superfamily protein
AT1G04290	AT1G04290	-	1:1147522-1148533	Col0Mockb_dir	dek2_1Mocka_dir	OK	34.0077	36.0162	0.0827843	0.301769	0.643	0.87628	no	AT1G04290	Thioesterase superfamily protein
AT1G04300	AT1G04300	-	1:1148596-1154652	Col0Mockb_dir	dek2_1Mocka_dir	OK	14.7829	12.566	-0.2344	-0.915109	0.16155	0.516903	no	AT1G04300	TRAF-like superfamily protein
AT1G04310	AT1G04310	-	1:1154763-1157711	Col0Mockb_dir	dek2_1Mocka_dir	OK	1.99342	2.58204	0.37326	0.906605	0.1638	0.520344	no	ERS2	ethylene response sensor 2
AT1G04330	AT1G04330	-	1:1161310-1161982	Col0Mockb_dir	dek2_1Mocka_dir	OK	2.64425	2.5706	-0.0407532	-0.0556709	0.92855	0.978102	no	AT1G04330	hypothetical protein
AT1G04340	AT1G04340	-	1:1163096-1164851	Col0Mockb_dir	dek2_1Mocka_dir	OK	12.6126	12.653	0.00460694	0.0149788	0.9813	0.994064	no	AT1G04340	HR-like lesion-inducing protein-like protein
AT1G04350	AT1G04350	-	1:1165164-1166768	Col0Mockb_dir	dek2_1Mocka_dir	OK	54.3603	41.315	-0.395886	-1.53449	0.01645	0.181296	no	AT1G04350	2-oxoglutarate (2OG) and Fe(II)-dependent oxygenase superfamily protein
AT1G04360	AT1G04360	-	1:1167456-1168878	Col0Mockb_dir	dek2_1Mocka_dir	OK	6.12761	5.59104	-0.132207	-0.357859	0.5955	0.852684	no	AT1G04360	RING/U-box superfamily protein
AT1G04370	AT1G04370	-	1:1175176-1175578	Col0Mockb_dir	dek2_1Mocka_dir	NOTEST	0.0837538	0.0399228	-1.06894	0	1	1	no	ERF14	Ethylene-responsive element binding factor 14
AT1G04380	AT1G04380	-	1:1176920-1178407	Col0Mockb_dir	dek2_1Mocka_dir	NOTEST	0.265548	0.212984	-0.318228	0	1	1	no	AT1G04380	2-oxoglutarate (2OG) and Fe(II)-dependent oxygenase superfamily protein
AT1G04390	AT1G04390	-	1:1179362-1183704	Col0Mockb_dir	dek2_1Mocka_dir	OK	3.89304	2.50869	-0.633964	-1.89511	0.00345	0.0735643	no	AT1G04390	BTB/POZ domain-containing protein
AT1G04400	AT1G04400	-	1:1185549-1188517	Col0Mockb_dir	dek2_1Mocka_dir	OK	27.2501	27.6046	0.0186445	0.07236	0.9121	0.972279	no	CRY2	cryptochrome 2
AT1G04410	AT1G04410	-	1:1189077-1191412	Col0Mockb_dir	dek2_1Mocka_dir	OK	306.929	258.263	-0.249064	-0.886831	0.166	0.523405	no	c-NAD-MDH1	Lactate/malate dehydrogenase family protein
AT1G04420	AT1G04420	-	1:1191607-1193884	Col0Mockb_dir	dek2_1Mocka_dir	OK	55.682	44.1939	-0.333363	-1.29466	0.04495	0.299255	no	AT1G04420	NAD(P)-linked oxidoreductase superfamily protein
AT1G04430	AT1G04430	-	1:1198117-1201527	Col0Mockb_dir	dek2_1Mocka_dir	OK	27.1945	34.0101	0.322651	1.25036	0.05445	0.320985	no	AT1G04430	S-adenosyl-L-methionine-dependent methyltransferases superfamily protein
AT1G04440	AT1G04440	-	1:1202254-1205803	Col0Mockb_dir	dek2_1Mocka_dir	OK	20.6113	19.6338	-0.0700951	-0.270539	0.6741	0.887273	no	CKL13	casein kinase like 13
AT1G04445	AT1G04445	-	1:1207343-1207862	Col0Mockb_dir	dek2_1Mocka_dir	NOTEST	0.071682	0.354531	2.30623	0	1	1	no	AT1G04445	C2H2-like zinc finger protein
AT1G04450	AT1G04450	-	1:1208520-1209874	Col0Mockb_dir	dek2_1Mocka_dir	NOTEST	0	0	0	0	1	1	no	RIC3	ROP-interactive CRIB motif-containing protein 3
AT1G04470	AT1G04470	-	1:1211048-1214662	Col0Mockb_dir	dek2_1Mocka_dir	NOTEST	0	0	0	0	1	1	no	AT1G04470	hypothetical protein (DUF810)
AT1G04480	AT1G04480	-	1:1216094-1217467	Col0Mockb_dir	dek2_1Mocka_dir	OK	193.774	175.695	-0.141305	-0.554797	0.3967	0.740613	no	AT1G04480	Ribosomal protein L14p/L23e family protein
AT1G04490	AT1G04490	-	1:1217947-1220137	Col0Mockb_dir	dek2_1Mocka_dir	NOTEST	0.381664	0.477028	0.321772	0	1	1	no	AT1G04490	hypothetical protein (DUF3527)
AT1G04500	AT1G04500	-	1:1221432-1224366	Col0Mockb_dir	dek2_1Mocka_dir	NOTEST	0	0.0768095	inf	0	1	1	no	AT1G04500	CCT motif family protein
AT1G04501	AT1G04501	-	1:1224551-1224680	Col0Mockb_dir	dek2_1Mocka_dir	NOTEST	0	0	0	0	1	1	no
AT1G04510	AT1G04510	-	1:1226574-1230827	Col0Mockb_dir	dek2_1Mocka_dir	OK	8.09366	6.63881	-0.285866	-1.0091	0.1193	0.457401	no	MAC3A	MOS4-associated complex 3A
AT1G04520	AT1G04520	-	1:1231577-1234032	Col0Mockb_dir	dek2_1Mocka_dir	OK	9.98906	10.5568	0.079751	0.270765	0.6734	0.887238	no	PDLP2	plasmodesmata-located protein 2
AT1G04530	AT1G04530	-	1:1234175-1236034	Col0Mockb_dir	dek2_1Mocka_dir	OK	23.4727	22.4732	-0.0627775	-0.23479	0.71885	0.907128	no	TPR4	Tetratricopeptide repeat (TPR)-like superfamily protein
AT1G04540	AT1G04540	-	1:1237255-1239061	Col0Mockb_dir	dek2_1Mocka_dir	OK	1.44508	1.03685	-0.478946	-0.775947	0.2387	0.605588	no	AT1G04540	Calcium-dependent lipid-binding (CaLB domain) family protein
AT1G04550	AT1G04550	-	1:1240374-1242121	Col0Mockb_dir	dek2_1Mocka_dir	OK	7.23748	7.81021	0.109874	0.322568	0.61105	0.860589	no	IAA12	AUX/IAA transcriptional regulator family protein
AT1G04555	AT1G04555	-	1:1242557-1244244	Col0Mockb_dir	dek2_1Mocka_dir	OK	1.72279	2.0023	0.216908	0.353764	0.5784	0.843488	no	AT1G04555	transmembrane protein
AT1G04560	AT1G04560	-	1:1244946-1246059	Col0Mockb_dir	dek2_1Mocka_dir	NOTEST	0	0	0	0	1	1	no	AT1G04560	AWPM-19-like family protein
AT1G04570	AT1G04570	-	1:1246727-1248775	Col0Mockb_dir	dek2_1Mocka_dir	OK	1.74419	0.862301	-1.01629	-1.60636	0.01735	0.185971	no	AT1G04570	Major facilitator superfamily protein
AT1G04580	AT1G04580	-	1:1252121-1257510	Col0Mockb_dir	dek2_1Mocka_dir	NOTEST	0.071593	0.0204802	-1.80559	0	1	1	no	AO4	aldehyde oxidase 4
AT1G04590	AT1G04590	-	1:1258576-1261426	Col0Mockb_dir	dek2_1Mocka_dir	OK	8.05013	7.33734	-0.133754	-0.440135	0.4899	0.798817	no	AT1G04590	PPR containing-like protein
AT1G04600	AT1G04600	-	1:1262122-1272376	Col0Mockb_dir	dek2_1Mocka_dir	NOTEST	0.0236061	0.0235008	-0.00644824	0	1	1	no	XIA	myosin XI A
AT1G04610	AT1G04610	-	1:1279387-1281618	Col0Mockb_dir	dek2_1Mocka_dir	OK	0.863305	0.520915	-0.728822	-0.927722	0.14615	0.497489	no	YUC3	YUCCA 3
AT1G04620	AT1G04620	-	1:1282740-1286584	Col0Mockb_dir	dek2_1Mocka_dir	OK	0.473599	0.70833	0.580756	0.812755	0.22	0.588222	no	HCAR	coenzyme F420 hydrogenase family / dehydrogenase, beta subunit family
AT1G04625	AT1G04625	-	1:1287830-1291112	Col0Mockb_dir	dek2_1Mocka_dir	NOTEST	0.0491631	0.0368836	-0.414599	0	1	1	no	AT1G04625	Polynucleotidyl transferase, ribonuclease H-like superfamily protein
AT1G04630	AT1G04630	-	1:1287830-1291112	Col0Mockb_dir	dek2_1Mocka_dir	OK	38.8067	38.3625	-0.0166076	-0.0631286	0.9222	0.975845	no	MEE4	GRIM-19 protein
AT1G04635	AT1G04635	-	1:1291313-1291995	Col0Mockb_dir	dek2_1Mocka_dir	OK	6.59636	6.59427	-0.000455838	-0.000858712	0.9955	0.997852	no	EMB1687	ribonuclease P family protein / Rpp14 family protein
AT1G04640	AT1G04640	-	1:1292079-1293357	Col0Mockb_dir	dek2_1Mocka_dir	OK	47.2106	46.111	-0.0339976	-0.130302	0.8404	0.95021	no	LIP2	lipoyltransferase 2
AT1G04645	AT1G04645	-	1:1293769-1294263	Col0Mockb_dir	dek2_1Mocka_dir	NOTEST	0	0	0	0	1	1	no	AT1G04645	Plant self-incompatibility protein S1 family
AT1G04650	AT1G04650	-	1:1294892-1299002	Col0Mockb_dir	dek2_1Mocka_dir	OK	1.94773	1.08253	-0.847383	-1.86356	0.00555	0.0991491	no	AT1G04650	holliday junction resolvase
AT1G04660	AT1G04660	-	1:1300485-1301773	Col0Mockb_dir	dek2_1Mocka_dir	OK	0.16796	0.597047	1.82973	1.0996	0.1285	0.472328	no	AT1G04660	glycine-rich protein
AT1G04670	AT1G04670	-	1:1301860-1302724	Col0Mockb_dir	dek2_1Mocka_dir	NOTEST	0	0	0	0	1	1	no	AT1G04670	hypothetical protein
AT1G04680	AT1G04680	-	1:1303528-1307884	Col0Mockb_dir	dek2_1Mocka_dir	OK	16.4001	17.7726	0.115949	0.444421	0.48705	0.797382	no	AT1G04680	Pectin lyase-like superfamily protein
AT1G04684	AT1G04684	-	1:1310429-1310579	Col0Mockb_dir	dek2_1Mocka_dir	NOTEST	0	0	0	0	1	1	no
AT1G04690	AT1G04690	-	1:1313563-1315750	Col0Mockb_dir	dek2_1Mocka_dir	OK	24.8251	27.0593	0.124325	0.474047	0.4645	0.782704	no	KAB1	potassium channel beta subunit 1
AT1G04700	AT1G04700	-	1:1316253-1320919	Col0Mockb_dir	dek2_1Mocka_dir	OK	0.733373	0.631014	-0.216873	-0.38187	0.55405	0.831346	no	AT1G04700	PB1 domain-containing protein tyrosine kinase
AT1G04710	AT1G04710	-	1:1321903-1324782	Col0Mockb_dir	dek2_1Mocka_dir	OK	9.42046	6.46106	-0.544028	-1.85594	0.00455	0.0875611	no	PKT4	peroxisomal 3-ketoacyl-CoA thiolase 4
AT1G04730	AT1G04730	-	1:1325295-1331086	Col0Mockb_dir	dek2_1Mocka_dir	OK	0.531676	0.429821	-0.306812	-0.493395	0.44095	0.770099	no	CTF18	P-loop containing nucleoside triphosphate hydrolases superfamily protein
AT1G04750	AT1G04750	-	1:1331465-1333567	Col0Mockb_dir	dek2_1Mocka_dir	OK	19.9072	23.7104	0.252234	0.933996	0.14715	0.499358	no	VAMP721	vesicle-associated membrane protein 721
AT1G04760	AT1G04760	-	1:1334759-1336070	Col0Mockb_dir	dek2_1Mocka_dir	NOTEST	0.247512	0.319199	0.366958	0	1	1	no	VAMP726	vesicle-associated membrane protein 726
AT1G04770	AT1G04770	-	1:1336370-1337849	Col0Mockb_dir	dek2_1Mocka_dir	OK	57.1387	74.7577	0.387754	1.57989	0.02095	0.201778	no	AT1G04770	Tetratricopeptide repeat (TPR)-like superfamily protein
AT1G04778	AT1G04778	-	1:1339891-1340327	Col0Mockb_dir	dek2_1Mocka_dir	OK	0.12371	1.01225	3.03253	1.2498	0.0769	0.375958	no	AT1G04778	hypothetical protein
AT1G04780	AT1G04780	-	1:1340668-1343584	Col0Mockb_dir	dek2_1Mocka_dir	OK	7.82569	8.0527	0.041253	0.148072	0.8225	0.944215	no	AT1G04780	Ankyrin repeat family protein
AT1G04790	AT1G04790	-	1:1345035-1348451	Col0Mockb_dir	dek2_1Mocka_dir	OK	3.95398	3.52918	-0.163971	-0.475394	0.4603	0.780593	no	AT1G04790	RING/U-box superfamily protein
AT1G04800	AT1G04800	-	1:1348451-1349286	Col0Mockb_dir	dek2_1Mocka_dir	OK	108.601	161.143	0.56931	2.48384	0.0002	0.0099685	yes	AT1G04800	glycine-rich protein
AT1G04810	AT1G04810	-	1:1350179-1355442	Col0Mockb_dir	dek2_1Mocka_dir	OK	11.374	11.2106	-0.0208733	-0.0803984	0.90245	0.969412	no	AT1G04810	26S proteasome regulatory complex, non-ATPase subcomplex, Rpn2/Psmd1 subunit
AT1G04820	AT1G04820	-	1:1356190-1358386	Col0Mockb_dir	dek2_1Mocka_dir	OK	261.199	242.886	-0.104872	-0.388787	0.5512	0.82983	no	TUA4	tubulin alpha-4 chain
AT1G04830	AT1G04830	-	1:1358573-1362019	Col0Mockb_dir	dek2_1Mocka_dir	OK	3.77536	3.60031	-0.068494	-0.198156	0.758	0.923449	no	AT1G04830	Ypt/Rab-GAP domain of gyp1p superfamily protein
AT1G04840	AT1G04840	-	1:1362866-1364962	Col0Mockb_dir	dek2_1Mocka_dir	NOTEST	0.141216	0.207739	0.556872	0	1	1	no	AT1G04840	Tetratricopeptide repeat (TPR)-like superfamily protein
AT1G04850	AT1G04850	-	1:1365117-1368844	Col0Mockb_dir	dek2_1Mocka_dir	OK	30.2272	25.5284	-0.243746	-0.945742	0.1448	0.495857	no	AT1G04850	ubiquitin-associated (UBA)/TS-N domain-containing protein
AT1G04860	AT1G04860	-	1:1369053-1373101	Col0Mockb_dir	dek2_1Mocka_dir	OK	6.33405	5.9503	-0.0901675	-0.318992	0.61985	0.8651	no	UBP2	ubiquitin-specific protease 2
AT1G04870	AT1G04870	-	1:1373233-1375762	Col0Mockb_dir	dek2_1Mocka_dir	OK	11.3741	12.4464	0.129982	0.458988	0.47875	0.792829	no	PRMT10	protein arginine methyltransferase 10
AT1G04880	AT1G04880	-	1:1375960-1379185	Col0Mockb_dir	dek2_1Mocka_dir	OK	0.805509	0.681854	-0.240436	-0.361473	0.5747	0.84168	no	AT1G04880	HMG (high mobility group) box protein with ARID/BRIGHT DNA-binding domain-containing protein
AT1G04890	AT1G04890	-	1:1380381-1382599	Col0Mockb_dir	dek2_1Mocka_dir	NOTEST	0	0	0	0	1	1	no	AT1G04890	zein-binding protein (Protein of unknown function, DUF593)
AT1G04900	AT1G04900	-	1:1383840-1391187	Col0Mockb_dir	dek2_1Mocka_dir	OK	1.99139	2.02711	0.025647	0.0326485	0.96075	0.988006	no	AT1G04900	NADH dehydrogenase ubiquinone complex I, assembly factor-like protein (DUF185)
AT1G04910	AT1G04910	-	1:1383840-1391187	Col0Mockb_dir	dek2_1Mocka_dir	OK	15.9745	13.1912	-0.276193	-0.978181	0.1304	0.475281	no	AT1G04910	O-fucosyltransferase family protein
AT1G04920	AT1G04920	-	1:1391501-1395864	Col0Mockb_dir	dek2_1Mocka_dir	NOTEST	0.288464	0.443004	0.618926	0	1	1	no	SPS3F	sucrose phosphate synthase 3F
AT1G04930	AT1G04930	-	1:1396290-1399053	Col0Mockb_dir	dek2_1Mocka_dir	OK	0.904139	0.739548	-0.2899	-0.439311	0.5104	0.810631	no	AT1G04930	hydroxyproline-rich glycoprotein family protein
AT1G04940	AT1G04940	-	1:1399173-1407501	Col0Mockb_dir	dek2_1Mocka_dir	OK	128.451	96.3233	-0.415263	-1.42617	0.03235	0.251056	no	Tic20-I	translocon at the inner envelope membrane of chloroplasts 20
AT1G04945	AT1G04945	-	1:1399173-1407501	Col0Mockb_dir	dek2_1Mocka_dir	OK	5.75157	4.20619	-0.45144	-0.498788	0.44825	0.773622	no	AT1G04945	HIT-type Zinc finger family protein
AT1G04950	AT1G04950	-	1:1399173-1407501	Col0Mockb_dir	dek2_1Mocka_dir	OK	6.73694	5.37116	-0.326859	-0.439679	0.49895	0.803317	no	TAFII59	TATA BOX ASSOCIATED FACTOR II 59
AT1G04960	AT1G04960	-	1:1407800-1410868	Col0Mockb_dir	dek2_1Mocka_dir	OK	5.86646	5.45289	-0.105471	-0.319386	0.6175	0.863993	no	AT1G04960	golgin family A protein (DUF1664)
AT1G04970	AT1G04970	-	1:1411169-1413627	Col0Mockb_dir	dek2_1Mocka_dir	OK	16.5335	14.7532	-0.164366	-0.600838	0.35005	0.703168	no	AT1G04970	lipid-binding serum glycoprotein family protein
AT1G04980	AT1G04980	-	1:1413643-1416144	Col0Mockb_dir	dek2_1Mocka_dir	OK	6.25773	6.11502	-0.0332824	-0.101264	0.8697	0.959252	no	PDIL2-2	PDI-like 2-2
AT1G04985	AT1G04985	-	1:1416342-1418482	Col0Mockb_dir	dek2_1Mocka_dir	OK	21.9294	18.0241	-0.282937	-1.05081	0.10955	0.441054	no	AT1G04985	triacylglycerol lipase-like protein
AT1G04990	AT1G04990	-	1:1419079-1421789	Col0Mockb_dir	dek2_1Mocka_dir	OK	6.56554	6.34402	-0.0495153	-0.156112	0.8083	0.938888	no	AT1G04990	Zinc finger C-x8-C-x5-C-x3-H type family protein
AT1G05000	AT1G05000	-	1:1425592-1428782	Col0Mockb_dir	dek2_1Mocka_dir	OK	3.00669	3.59991	0.259782	0.671733	0.3091	0.6728	no	PFA-DSP1	Phosphotyrosine protein phosphatases superfamily protein
AT1G05010	AT1G05010	-	1:1431189-1432858	Col0Mockb_dir	dek2_1Mocka_dir	OK	73.0169	83.7761	0.19831	0.786918	0.23405	0.601942	no	EFE	ethylene-forming enzyme
AT1G05020	AT1G05020	-	1:1435253-1437667	Col0Mockb_dir	dek2_1Mocka_dir	NOTEST	0.293158	0.278864	-0.0721144	0	1	1	no	AT1G05020	ENTH/ANTH/VHS superfamily protein
AT1G05030	AT1G05030	-	1:1438151-1441417	Col0Mockb_dir	dek2_1Mocka_dir	OK	4.64308	3.60818	-0.36381	-1.04701	0.11465	0.44916	no	AT1G05030	Major facilitator superfamily protein
AT1G05040	AT1G05040	-	1:1447368-1448448	Col0Mockb_dir	dek2_1Mocka_dir	NOTEST	0	0.0904986	inf	0	1	1	no	AT1G05040	UBA-like domain protein
AT1G05055	AT1G05055	-	1:1448717-1450887	Col0Mockb_dir	dek2_1Mocka_dir	OK	4.42034	3.67758	-0.2654	-0.68986	0.2891	0.657516	no	GTF2H2	general transcription factor II H2
AT1G05060	AT1G05060	-	1:1451029-1452872	Col0Mockb_dir	dek2_1Mocka_dir	OK	4.16821	3.35158	-0.314587	-0.709053	0.26935	0.638302	no	AT1G05060	coiled-coil protein
AT1G05065	AT1G05065	-	1:1454968-1455220	Col0Mockb_dir	dek2_1Mocka_dir	OK	5.3482	8.66687	0.696459	0.553484	0.4398	0.769554	no	CLE20	CLAVATA3/ESR-RELATED 20
AT1G05070	AT1G05070	-	1:1457062-1458744	Col0Mockb_dir	dek2_1Mocka_dir	OK	35.8167	31.3949	-0.190102	-0.726649	0.2635	0.632482	no	AT1G05070	transmembrane protein, putative (DUF1068)
AT1G05080	AT1G05080	-	1:1459090-1460579	Col0Mockb_dir	dek2_1Mocka_dir	NOTEST	0	0	0	0	1	1	no	AT1G05080	F-box/RNI-like/FBD-like domains-containing protein
AT1G05085	AT1G05085	-	1:1460987-1461670	Col0Mockb_dir	dek2_1Mocka_dir	NOTEST	0	0	0	0	1	1	no	AT1G05085	hypothetical protein
AT1G05090	AT1G05090	-	1:1463201-1465622	Col0Mockb_dir	dek2_1Mocka_dir	OK	3.46986	3.9177	0.175131	0.461105	0.4801	0.793152	no	AT1G05090	dentin sialophosphoprotein-like protein
AT1G05100	AT1G05100	-	1:1469609-1470881	Col0Mockb_dir	dek2_1Mocka_dir	OK	1.51643	1.17969	-0.362272	-0.605984	0.39915	0.742915	no	MAPKKK18	mitogen-activated protein kinase kinase kinase 18
AT1G05120	AT1G05120	-	1:1471405-1476078	Col0Mockb_dir	dek2_1Mocka_dir	OK	1.8425	2.27519	0.304319	0.803651	0.2051	0.5727	no	AT1G05120	Helicase protein with RING/U-box domain-containing protein
AT1G05136	AT1G05136	-	1:1478922-1479063	Col0Mockb_dir	dek2_1Mocka_dir	NOTEST	0	0	0	0	1	1	no	AT1G05136	hypothetical protein
AT1G05140	AT1G05140	-	1:1482547-1484056	Col0Mockb_dir	dek2_1Mocka_dir	OK	72.2826	58.5589	-0.303759	-1.2211	0.06625	0.350989	no	AT1G05140	Peptidase M50 family protein
AT1G05150	AT1G05150	-	1:1484066-1486960	Col0Mockb_dir	dek2_1Mocka_dir	OK	10.9517	9.95836	-0.13718	-0.508584	0.4455	0.772977	no	AT1G05150	Calcium-binding tetratricopeptide family protein
AT1G05160	AT1G05160	-	1:1487377-1490947	Col0Mockb_dir	dek2_1Mocka_dir	OK	1.91806	1.66003	-0.208435	-0.464034	0.47835	0.792493	no	CYP88A3	cytochrome P450, family 88, subfamily A, polypeptide 3
AT1G05170	AT1G05170	-	1:1491110-1494248	Col0Mockb_dir	dek2_1Mocka_dir	OK	5.73543	4.69779	-0.287919	-0.877165	0.1646	0.521444	no	AT1G05170	Galactosyltransferase family protein
AT1G05180	AT1G05180	-	1:1498113-1501824	Col0Mockb_dir	dek2_1Mocka_dir	OK	3.01745	2.29044	-0.397704	-1.02178	0.11	0.441663	no	AXR1	NAD(P)-binding Rossmann-fold superfamily protein
AT1G05190	AT1G05190	-	1:1502343-1503830	Col0Mockb_dir	dek2_1Mocka_dir	OK	546.052	481.209	-0.182375	-0.644841	0.313	0.675282	no	emb2394	Ribosomal protein L6 family
AT1G05200	AT1G05200	-	1:1504959-1510281	Col0Mockb_dir	dek2_1Mocka_dir	OK	25.4691	17.1563	-0.570006	-2.01115	0.0017	0.0456163	yes	GLR3.4	glutamate receptor 3.4
AT1G05205	AT1G05205	-	1:1504959-1510281	Col0Mockb_dir	dek2_1Mocka_dir	OK	17.4317	16.7653	-0.0562374	-0.0840662	0.89245	0.966106	no	AT1G05205	hexokinase-1 protein
AT1G05210	AT1G05210	-	1:1510403-1511683	Col0Mockb_dir	dek2_1Mocka_dir	OK	11.1101	10.4849	-0.0835574	-0.237299	0.71615	0.905658	no	AT1G05210	Transmembrane protein 97, Putative
AT1G05220	AT1G05220	-	1:1511906-1518805	Col0Mockb_dir	dek2_1Mocka_dir	OK	0.91233	0.727188	-0.327227	-0.283466	0.6597	0.881777	no	AT1G05220	Transmembrane protein 97, Putative
AT1G05230	AT1G05230	-	1:1511906-1518805	Col0Mockb_dir	dek2_1Mocka_dir	OK	1.84782	1.7481	-0.0800407	-0.210543	0.7444	0.918385	no	HDG2	homeodomain GLABROUS 2
AT1G05240	AT1G05240	-	1:1521136-1522681	Col0Mockb_dir	dek2_1Mocka_dir	OK	7.92023	12.638	0.67415	2.16647	0.00135	0.039407	yes	AT1G05240	Peroxidase superfamily protein
AT1G05250	AT1G05250	-	1:1525600-1527234	Col0Mockb_dir	dek2_1Mocka_dir	OK	8.44866	12.3606	0.548956	1.78878	0.0084	0.125918	no	AT1G05250	Peroxidase superfamily protein
AT1G05260	AT1G05260	-	1:1529766-1531439	Col0Mockb_dir	dek2_1Mocka_dir	OK	77.0599	69.8576	-0.141563	-0.525001	0.4155	0.754035	no	RCI3	Peroxidase superfamily protein
AT1G05270	AT1G05270	-	1:1531640-1534410	Col0Mockb_dir	dek2_1Mocka_dir	OK	7.95309	7.64028	-0.0578891	-0.191009	0.7588	0.923705	no	AT1G05270	TraB family protein
AT1G05280	AT1G05280	-	1:1535443-1537525	Col0Mockb_dir	dek2_1Mocka_dir	NOTEST	0.192346	0.444712	1.20917	0	1	1	no	AT1G05280	ERV-F (C)1 provirus ancestral Env polyprotein, putative (DUF604)
AT1G05290	AT1G05290	-	1:1539151-1540562	Col0Mockb_dir	dek2_1Mocka_dir	NOTEST	0	0	0	0	1	1	no	AT1G05290	CCT motif family protein
AT1G05291	AT1G05291	-	1:1541347-1542432	Col0Mockb_dir	dek2_1Mocka_dir	NOTEST	0	0	0	0	1	1	no	AT1G05291	GPI inositol-deacylase C, putative (DUF1218)
AT1G05300	AT1G05300	-	1:1545105-1547849	Col0Mockb_dir	dek2_1Mocka_dir	OK	0.574256	1.04956	0.870023	1.20009	0.08225	0.389043	no	ZIP5	zinc transporter 5 precursor
AT1G05310	AT1G05310	-	1:1550542-1552517	Col0Mockb_dir	dek2_1Mocka_dir	OK	1.22493	1.35047	0.14076	0.214106	0.7456	0.919017	no	AT1G05310	Pectin lyase-like superfamily protein
AT1G05320	AT1G05320	-	1:1553602-1557733	Col0Mockb_dir	dek2_1Mocka_dir	OK	3.05041	3.99893	0.39061	1.20532	0.06945	0.357415	no	AT1G05320	myosin heavy chain, embryonic smooth protein
AT1G05330	AT1G05330	-	1:1558169-1558583	Col0Mockb_dir	dek2_1Mocka_dir	NOTEST	0	0.0969132	inf	0	1	1	no	AT1G05330	hypothetical protein
AT1G05340	AT1G05340	-	1:1558843-1559903	Col0Mockb_dir	dek2_1Mocka_dir	OK	3.44437	4.17284	0.276787	0.484239	0.4855	0.796397	no	AT1G05340	cysteine-rich TM module stress tolerance protein
AT1G05350	AT1G05350	-	1:1560677-1564123	Col0Mockb_dir	dek2_1Mocka_dir	OK	9.64965	7.18646	-0.425196	-1.47937	0.02165	0.204832	no	AT1G05350	NAD(P)-binding Rossmann-fold superfamily protein
AT1G05360	AT1G05360	-	1:1564597-1567465	Col0Mockb_dir	dek2_1Mocka_dir	OK	5.48223	5.06363	-0.11459	-0.341662	0.58515	0.847594	no	KMS2	vacuole membrane-like protein
AT1G05370	AT1G05370	-	1:1569191-1572280	Col0Mockb_dir	dek2_1Mocka_dir	OK	0.860351	1.15778	0.428368	0.724325	0.2772	0.64585	no	AT1G05370	Sec14p-like phosphatidylinositol transfer family protein
AT1G05380	AT1G05380	-	1:1576862-1582614	Col0Mockb_dir	dek2_1Mocka_dir	OK	4.75958	4.51537	-0.0759914	-0.267999	0.6761	0.887854	no	AT1G05380	Acyl-CoA N-acyltransferase with RING/FYVE/PHD-type zinc finger protein
AT1G05385	AT1G05385	-	1:1582670-1583718	Col0Mockb_dir	dek2_1Mocka_dir	OK	26.3647	21.698	-0.281049	-0.927288	0.15215	0.505485	no	LPA19	photosystem II 11 kDa protein-like protein
AT1G05400	AT1G05400	-	1:1584072-1587778	Col0Mockb_dir	dek2_1Mocka_dir	OK	0.706283	0.90608	0.359392	0.199017	0.77105	0.926887	no	AT1G05400	hypothetical protein
AT1G05410	AT1G05410	-	1:1584072-1587778	Col0Mockb_dir	dek2_1Mocka_dir	OK	10.6438	7.69043	-0.468882	-1.55672	0.01605	0.17987	no	AT1G05410	CDPK adapter, putative (DUF1423)
AT1G05420	AT1G05420	-	1:1590072-1590753	Col0Mockb_dir	dek2_1Mocka_dir	OK	1.02331	1.29173	0.33607	0.347132	0.6545	0.879593	no	OFP12	ovate family protein 12
AT1G05430	AT1G05430	-	1:1594056-1595818	Col0Mockb_dir	dek2_1Mocka_dir	OK	12.1171	12.9706	0.0981948	0.324012	0.6215	0.865706	no	AT1G05430	hypothetical protein
AT1G05440	AT1G05440	-	1:1596006-1597848	Col0Mockb_dir	dek2_1Mocka_dir	OK	2.86262	2.07989	-0.460827	-0.905988	0.16135	0.516903	no	AT1G05440	C-8 sterol isomerase
AT1G05450	AT1G05450	-	1:1599910-1605027	Col0Mockb_dir	dek2_1Mocka_dir	OK	1.53619	0.567915	-1.43561	-0.879824	0.22115	0.58929	no	AT1G05450	Bifunctional inhibitor/lipid-transfer protein/seed storage 2S albumin superfamily protein
AT1G05460	AT1G05460	-	1:1599910-1605027	Col0Mockb_dir	dek2_1Mocka_dir	OK	2.90723	2.52539	-0.203142	-0.553432	0.3966	0.740613	no	SDE3	P-loop containing nucleoside triphosphate hydrolases superfamily protein
AT1G05470	AT1G05470	-	1:1607356-1611703	Col0Mockb_dir	dek2_1Mocka_dir	OK	1.71842	1.88517	0.133614	0.327586	0.612	0.861197	no	CVP2	DNAse I-like superfamily protein
AT1G05490	AT1G05490	-	1:1618601-1623452	Col0Mockb_dir	dek2_1Mocka_dir	NOTEST	0.163451	0.288663	0.820528	0	1	1	no	chr31	chromatin remodeling 31
AT1G05500	AT1G05500	-	1:1624954-1629224	Col0Mockb_dir	dek2_1Mocka_dir	OK	14.7349	13.1963	-0.159102	-0.601013	0.35685	0.7089	no	NTMC2T2.1	Calcium-dependent lipid-binding (CaLB domain) family protein
AT1G05510	AT1G05510	-	1:1629445-1630863	Col0Mockb_dir	dek2_1Mocka_dir	NOTEST	0	0	0	0	1	1	no	AT1G05510	naphthalene 1,2-dioxygenase subunit alpha (DUF1264)
AT1G05520	AT1G05520	-	1:1630899-1635711	Col0Mockb_dir	dek2_1Mocka_dir	OK	5.34163	5.8155	0.122622	0.420434	0.50925	0.809965	no	AT1G05520	Sec23/Sec24 protein transport family protein
AT1G05530	AT1G05530	-	1:1636495-1637863	Col0Mockb_dir	dek2_1Mocka_dir	OK	0.872674	1.13508	0.379284	0.46373	0.46895	0.786329	no	UGT75B2	UDP-glucosyl transferase 75B2
AT1G05540	AT1G05540	-	1:1639285-1640811	Col0Mockb_dir	dek2_1Mocka_dir	OK	9.84685	6.25603	-0.654416	-1.91789	0.00395	0.0806877	no	AT1G05540	hypothetical protein (DUF295)
AT1G05550	AT1G05550	-	1:1640958-1643917	Col0Mockb_dir	dek2_1Mocka_dir	NOTEST	0.0816443	0.106083	0.37777	0	1	1	no	AT1G05550	hypothetical protein (DUF295)
AT1G05560	AT1G05560	-	1:1645497-1647147	Col0Mockb_dir	dek2_1Mocka_dir	OK	34.4761	30.9658	-0.15492	-0.621311	0.3627	0.713061	no	UGT75B1	UDP-glucosyltransferase 75B1
AT1G05570	AT1G05570	-	1:1647705-1659437	Col0Mockb_dir	dek2_1Mocka_dir	OK	2.28055	2.53812	0.154379	0.538261	0.40595	0.747776	no	CALS1	callose synthase 1
AT1G05575	AT1G05575	-	1:1661690-1662187	Col0Mockb_dir	dek2_1Mocka_dir	OK	0.966487	5.31642	2.45963	2.06921	0.0228	0.209453	no	AT1G05575	transmembrane protein
AT1G05577	AT1G05577	-	1:1662369-1664398	Col0Mockb_dir	dek2_1Mocka_dir	NOTEST	0.124403	0.115712	-0.104487	0	1	1	no	AT1G05577	UPSTREAM OF FLC protein (DUF966)
AT1G05580	AT1G05580	-	1:1665432-1668904	Col0Mockb_dir	dek2_1Mocka_dir	NOTEST	0	0	0	0	1	1	no	CHX23	cation/H exchanger 23
AT1G05590	AT1G05590	-	1:1669349-1671876	Col0Mockb_dir	dek2_1Mocka_dir	OK	9.76836	8.18602	-0.254955	-0.876539	0.183	0.545809	no	HEXO2	beta-hexosaminidase 2
AT1G05600	AT1G05600	-	1:1671935-1673856	Col0Mockb_dir	dek2_1Mocka_dir	OK	4.04512	4.16175	0.0410076	0.100926	0.87505	0.96009	no	EMB3101	Tetratricopeptide repeat (TPR)-like superfamily protein
AT1G05610	AT1G05610	-	1:1673860-1675934	Col0Mockb_dir	dek2_1Mocka_dir	OK	0.612602	0.338587	-0.855425	-0.854603	0.19075	0.55591	no	APS2	ADP-glucose pyrophosphorylase small subunit 2
AT1G05615	AT1G05615	-	1:1677506-1678270	Col0Mockb_dir	dek2_1Mocka_dir	NOTEST	0	0.0695049	inf	0	1	1	no	AT1G05615	B3 domain protein (DUF313)
AT1G05620	AT1G05620	-	1:1679157-1681710	Col0Mockb_dir	dek2_1Mocka_dir	OK	3.78302	4.51095	0.253893	0.661276	0.30385	0.668858	no	URH2	uridine-ribohydrolase 2
AT1G05630	AT1G05630	-	1:1682317-1687363	Col0Mockb_dir	dek2_1Mocka_dir	OK	3.16344	2.8435	-0.153827	-0.498759	0.4418	0.770686	no	5PTASE13	Endonuclease/exonuclease/phosphatase family protein
AT1G05640	AT1G05640	-	1:1687435-1689501	Col0Mockb_dir	dek2_1Mocka_dir	OK	0.718202	0.720904	0.00541743	0.00769352	0.9937	0.997754	no	AT1G05640	Ankyrin repeat family protein
AT1G05650	AT1G05650	-	1:1690263-1692126	Col0Mockb_dir	dek2_1Mocka_dir	OK	0.389104	0.805141	1.04909	1.09864	0.1032	0.430169	no	AT1G05650	Pectin lyase-like superfamily protein
AT1G05660	AT1G05660	-	1:1694285-1696058	Col0Mockb_dir	dek2_1Mocka_dir	OK	0.586104	1.39977	1.25596	1.58423	0.0201	0.197796	no	AT1G05660	Pectin lyase-like superfamily protein
AT1G05670	AT1G05670	-	1:1697586-1701025	Col0Mockb_dir	dek2_1Mocka_dir	OK	1.65386	1.4918	-0.148783	-0.319775	0.62315	0.866793	no	AT1G05670	Pentatricopeptide repeat (PPR-like) superfamily protein
AT1G05675	AT1G05675	-	1:1701115-1702749	Col0Mockb_dir	dek2_1Mocka_dir	OK	0.297271	1.02087	1.77995	1.74014	0.0302	0.241225	no	AT1G05675	UDP-Glycosyltransferase superfamily protein
AT1G05680	AT1G05680	-	1:1703091-1704691	Col0Mockb_dir	dek2_1Mocka_dir	OK	10.8478	9.33211	-0.217133	-0.707835	0.29055	0.658635	no	UGT74E2	Uridine diphosphate glycosyltransferase 74E2
AT1G05690	AT1G05690	-	1:1707010-1709347	Col0Mockb_dir	dek2_1Mocka_dir	OK	3.92882	3.42164	-0.199406	-0.496923	0.4463	0.773028	no	BT3	BTB and TAZ domain protein 3
AT1G05700	AT1G05700	-	1:1709795-1713245	Col0Mockb_dir	dek2_1Mocka_dir	OK	1.06343	0.978041	-0.120752	-0.216508	0.73785	0.915118	no	AT1G05700	Leucine-rich repeat transmembrane protein kinase protein
AT1G05710	AT1G05710	-	1:1714949-1717276	Col0Mockb_dir	dek2_1Mocka_dir	OK	10.178	8.20055	-0.311658	-1.01261	0.1183	0.456065	no	AT1G05710	basic helix-loop-helix (bHLH) DNA-binding superfamily protein
AT1G05720	AT1G05720	-	1:1717446-1720303	Col0Mockb_dir	dek2_1Mocka_dir	OK	10.9002	11.3648	0.0602213	0.163772	0.7982	0.935619	no	AT1G05720	selenoprotein family protein
AT1G05730	AT1G05730	-	1:1717446-1720303	Col0Mockb_dir	dek2_1Mocka_dir	OK	2.44641	2.94369	0.26696	0.367213	0.5661	0.837825	no	AT1G05730	FAM136A-like protein (DUF842)
AT1G05740	AT1G05740	-	1:1720673-1721309	Col0Mockb_dir	dek2_1Mocka_dir	NOTEST	0.120605	0.0347815	-1.7939	0	1	1	no	AT1G05740	FAM136A-like protein (DUF842)
AT1G05750	AT1G05750	-	1:1721508-1724734	Col0Mockb_dir	dek2_1Mocka_dir	OK	1.16097	1.18167	0.0254885	0.0383564	0.95105	0.985555	no	PDE247	Tetratricopeptide repeat (TPR)-like superfamily protein
AT1G05760	AT1G05760	-	1:1721508-1724734	Col0Mockb_dir	dek2_1Mocka_dir	OK	3.61707	7.06557	0.965987	1.10098	0.1344	0.482886	no	RTM1	Mannose-binding lectin superfamily protein
AT1G05770	AT1G05770	-	1:1725387-1726283	Col0Mockb_dir	dek2_1Mocka_dir	OK	1.0091	1.4845	0.556904	0.55389	0.3816	0.727573	no	AT1G05770	Mannose-binding lectin superfamily protein
AT1G05780	AT1G05780	-	1:1726607-1728404	Col0Mockb_dir	dek2_1Mocka_dir	OK	7.53544	7.29895	-0.0460021	-0.129578	0.8406	0.950275	no	AT1G05780	Vacuolar ATPase assembly integral membrane protein VMA21-like domain-containing protein
AT1G05785	AT1G05785	-	1:1730248-1732626	Col0Mockb_dir	dek2_1Mocka_dir	OK	1.8398	1.34011	-0.457196	-0.759034	0.2374	0.605344	no	AT1G05785	Got1/Sft2-like vescicle transport protein family
AT1G05790	AT1G05790	-	1:1732870-1737489	Col0Mockb_dir	dek2_1Mocka_dir	OK	3.1158	2.87284	-0.117124	-0.348106	0.5913	0.850775	no	AT1G05790	lipase class 3 family protein
AT1G05800	AT1G05800	-	1:1741203-1742619	Col0Mockb_dir	dek2_1Mocka_dir	NOTEST	0	0	0	0	1	1	no	DGL	alpha/beta-Hydrolases superfamily protein
AT1G05805	AT1G05805	-	1:1744772-1747693	Col0Mockb_dir	dek2_1Mocka_dir	OK	4.7703	4.92175	0.0450928	0.134585	0.8318	0.947201	no	AT1G05805	basic helix-loop-helix (bHLH) DNA-binding superfamily protein
AT1G05810	AT1G05810	-	1:1748313-1749460	Col0Mockb_dir	dek2_1Mocka_dir	OK	3.56104	6.67265	0.905962	2.01911	0.0042	0.0834849	no	RABA5E	Rab GTPase-like A5A protein
AT1G05820	AT1G05820	-	1:1749681-1753990	Col0Mockb_dir	dek2_1Mocka_dir	OK	1.04536	0.796414	-0.392404	-0.700782	0.2805	0.649666	no	SPPL5	SIGNAL PEPTIDE PEPTIDASE-LIKE 5
AT1G05830	AT1G05830	-	1:1754243-1761817	Col0Mockb_dir	dek2_1Mocka_dir	OK	1.65637	2.0821	0.33002	0.973888	0.12235	0.462162	no	ATX2	trithorax-like protein 2
AT1G05835	AT1G05835	-	1:1762223-1766281	Col0Mockb_dir	dek2_1Mocka_dir	OK	34.878	30.648	-0.186525	-0.49693	0.4521	0.775623	no	AT1G05835	PHD finger protein
AT1G05840	AT1G05840	-	1:1762223-1766281	Col0Mockb_dir	dek2_1Mocka_dir	OK	3.06107	2.9305	-0.0628889	-0.113351	0.85975	0.95652	no	AT1G05840	Eukaryotic aspartyl protease family protein
AT1G05850	AT1G05850	-	1:1766502-1768695	Col0Mockb_dir	dek2_1Mocka_dir	OK	195.539	200.527	0.0363427	0.135714	0.83625	0.9488	no	POM1	Chitinase family protein
AT1G05860	AT1G05860	-	1:1769013-1771115	Col0Mockb_dir	dek2_1Mocka_dir	OK	4.43932	4.27146	-0.0556098	-0.144048	0.8172	0.941341	no	AT1G05860	INO80 complex subunit D-like protein
AT1G05870	AT1G05870	-	1:1771456-1773293	Col0Mockb_dir	dek2_1Mocka_dir	OK	29.518	21.6939	-0.444303	-1.67539	0.01085	0.145864	no	AT1G05870	hypothetical protein (DUF1685)
AT1G05880	AT1G05880	-	1:1775642-1778553	Col0Mockb_dir	dek2_1Mocka_dir	NOTEST	0.101374	0.0866095	-0.22709	0	1	1	no	ARI12	RING/U-box superfamily protein
AT1G05890	AT1G05890	-	1:1779255-1784529	Col0Mockb_dir	dek2_1Mocka_dir	OK	11.2779	10.1659	-0.149755	-0.573024	0.3782	0.724877	no	ARI5	RING/U-box superfamily protein
AT1G05894	AT1G05894	-	1:1784802-1786292	Col0Mockb_dir	dek2_1Mocka_dir	OK	1.0767	0.635483	-0.760695	-0.902773	0.1608	0.516903	no	AT1G05894	hypothetical protein
AT1G05900	AT1G05900	-	1:1786855-1789676	Col0Mockb_dir	dek2_1Mocka_dir	OK	7.49843	5.64982	-0.408386	-1.27848	0.0497	0.3113	no	NTH2	endonuclease III 2
AT1G05910	AT1G05910	-	1:1790223-1796647	Col0Mockb_dir	dek2_1Mocka_dir	OK	4.54743	3.85137	-0.239681	-0.843479	0.19165	0.557149	no	AT1G05910	cell division cycle protein 48-related / CDC48-like protein
AT1G05920	AT1G05920	-	1:1796777-1798254	Col0Mockb_dir	dek2_1Mocka_dir	NOTEST	0	0	0	0	1	1	no	AT1G05920	B3 domain protein (DUF313)
AT1G05925	AT1G05925	-	1:1798900-1799062	Col0Mockb_dir	dek2_1Mocka_dir	NOTEST	0	0	0	0	1	1	no
AT1G05930	AT1G05930	-	1:1799417-1800933	Col0Mockb_dir	dek2_1Mocka_dir	NOTEST	0.281177	0.0305427	-3.20258	0	1	1	no	AT1G05930	B3 domain protein (DUF313)
AT1G05940	AT1G05940	-	1:1801161-1803984	Col0Mockb_dir	dek2_1Mocka_dir	OK	19.5625	14.2633	-0.455782	-1.81375	0.00975	0.136315	no	CAT9	cationic amino acid transporter 9
AT1G05950	AT1G05950	-	1:1804400-1807471	Col0Mockb_dir	dek2_1Mocka_dir	OK	2.23215	2.12603	-0.0702714	-0.162777	0.79995	0.935786	no	AT1G05950	hypothetical protein
AT1G05960	AT1G05960	-	1:1807972-1815474	Col0Mockb_dir	dek2_1Mocka_dir	OK	6.95336	5.98422	-0.216548	-0.816202	0.21595	0.583499	no	AT1G05960	ARM repeat superfamily protein
AT1G05970	AT1G05970	-	1:1816055-1817282	Col0Mockb_dir	dek2_1Mocka_dir	OK	9.03656	8.03171	-0.170066	-0.468399	0.4725	0.788787	no	AT1G05970	RNA-binding (RRM/RBD/RNP motifs) family protein
AT1G05990	AT1G05990	-	1:1818446-1819040	Col0Mockb_dir	dek2_1Mocka_dir	NOTEST	0	0.469217	inf	0	1	1	no	AT1G05990	EF hand calcium-binding protein family
AT1G06000	AT1G06000	-	1:1820307-1821894	Col0Mockb_dir	dek2_1Mocka_dir	OK	50.1981	38.1475	-0.396042	-1.71957	0.01845	0.190985	no	AT1G06000	UDP-Glycosyltransferase superfamily protein
AT1G06010	AT1G06010	-	1:1822617-1823997	Col0Mockb_dir	dek2_1Mocka_dir	OK	16.3117	11.1841	-0.544467	-1.6729	0.01155	0.151395	no	AT1G06010	basic leucine zipper/W2 domain protein
AT1G06020	AT1G06020	-	1:1824547-1826101	Col0Mockb_dir	dek2_1Mocka_dir	NOTEST	0.474905	0.28744	-0.724375	0	1	1	no	AT1G06020	pfkB-like carbohydrate kinase family protein
AT1G06030	AT1G06030	-	1:1826879-1828161	Col0Mockb_dir	dek2_1Mocka_dir	NOTEST	0.0639386	0.0336411	-0.926464	0	1	1	no	AT1G06030	pfkB-like carbohydrate kinase family protein
AT1G06040	AT1G06040	-	1:1828412-1829890	Col0Mockb_dir	dek2_1Mocka_dir	OK	213.732	171.54	-0.31726	-1.21585	0.0617	0.340469	no	STO	B-box zinc finger family protein
AT1G06050	AT1G06050	-	1:1830604-1832555	Col0Mockb_dir	dek2_1Mocka_dir	OK	4.11499	4.92984	0.260653	0.651527	0.30965	0.673259	no	AT1G06050	ENHANCED DISEASE RESISTANCE-like protein (DUF1336)
AT1G06060	AT1G06060	-	1:1832942-1837648	Col0Mockb_dir	dek2_1Mocka_dir	OK	13.2882	10.9445	-0.27994	-0.769079	0.239	0.60561	no	AT1G06060	LisH and RanBPM domains containing protein
AT1G06070	AT1G06070	-	1:1832942-1837648	Col0Mockb_dir	dek2_1Mocka_dir	OK	6.37817	4.94776	-0.366367	-0.880383	0.1747	0.535328	no	AT1G06070	Basic-leucine zipper (bZIP) transcription factor family protein
AT1G06080	AT1G06080	-	1:1843567-1846302	Col0Mockb_dir	dek2_1Mocka_dir	OK	2.87756	2.81446	-0.0319868	-0.0741273	0.90655	0.970671	no	ADS1	delta 9 desaturase 1
AT1G06090	AT1G06090	-	1:1847882-1849693	Col0Mockb_dir	dek2_1Mocka_dir	OK	0.835818	3.10495	1.89331	2.87049	0.00105	0.0329667	yes	AT1G06090	Fatty acid desaturase family protein
AT1G06100	AT1G06100	-	1:1851529-1853019	Col0Mockb_dir	dek2_1Mocka_dir	OK	0.475683	0.935463	0.975679	0.97798	0.1629	0.518974	no	AT1G06100	Fatty acid desaturase family protein
AT1G06110	AT1G06110	-	1:1853076-1855031	Col0Mockb_dir	dek2_1Mocka_dir	OK	11.2936	9.80511	-0.203903	-0.69375	0.2913	0.658803	no	SKIP16	SKP1/ASK-interacting protein 16
AT1G06120	AT1G06120	-	1:1855942-1857718	Col0Mockb_dir	dek2_1Mocka_dir	OK	0.712074	0.982579	0.464546	0.54966	0.39235	0.737325	no	AT1G06120	Fatty acid desaturase family protein
AT1G06130	AT1G06130	-	1:1857766-1860730	Col0Mockb_dir	dek2_1Mocka_dir	OK	7.80555	6.5006	-0.263927	-0.862787	0.19595	0.562109	no	GLX2-4	glyoxalase 2-4
AT1G06135	AT1G06135	-	1:1862196-1862742	Col0Mockb_dir	dek2_1Mocka_dir	NOTEST	0	0.0175981	inf	0	1	1	no	AT1G06135	transmembrane protein
AT1G06137	AT1G06137	-	1:1863543-1863750	Col0Mockb_dir	dek2_1Mocka_dir	NOTEST	0	0	0	0	1	1	no	AT1G06137	transmembrane protein
AT1G06140	AT1G06140	-	1:1864795-1866472	Col0Mockb_dir	dek2_1Mocka_dir	NOTEST	0.204162	0.361908	0.825907	0	1	1	no	MEF3	Pentatricopeptide repeat (PPR) superfamily protein
AT1G06148	AT1G06148	-	1:1874884-1877528	Col0Mockb_dir	dek2_1Mocka_dir	NOTEST	0.19355	0.212346	0.133711	0	1	1	no	AT1G06148	hypothetical protein
AT1G06149	AT1G06149	-	1:1867014-1873718	Col0Mockb_dir	dek2_1Mocka_dir	OK	4.36699	4.80152	0.136852	0.248062	0.70305	0.900527	no
AT1G06150	AT1G06150	-	1:1867014-1873718	Col0Mockb_dir	dek2_1Mocka_dir	OK	2.14422	1.60641	-0.416613	-0.48999	0.4682	0.7856	no	EMB1444	basic helix loop helix (bHLH) DNA-binding superfamily protein
AT1G06160	AT1G06160	-	1:1883003-1883934	Col0Mockb_dir	dek2_1Mocka_dir	OK	0.683451	0.955968	0.484124	0.489235	0.4704	0.78752	no	ORA59	octadecanoid-responsive AP2/ERF 59
AT1G06170	AT1G06170	-	1:1884980-1886897	Col0Mockb_dir	dek2_1Mocka_dir	NOTEST	0.134655	0.261823	0.959317	0	1	1	no	AT1G06170	basic helix-loop-helix (bHLH) DNA-binding superfamily protein
AT1G06180	AT1G06180	-	1:1889407-1891158	Col0Mockb_dir	dek2_1Mocka_dir	OK	10.7528	8.93599	-0.267011	-0.811157	0.20575	0.573631	no	MYB13	myb domain protein 13
AT1G06190	AT1G06190	-	1:1892272-1894148	Col0Mockb_dir	dek2_1Mocka_dir	OK	70.6067	53.0725	-0.411842	-1.61671	0.01265	0.157824	no	RHON1	Rho termination factor
AT1G06200	AT1G06200	-	1:1894335-1896935	Col0Mockb_dir	dek2_1Mocka_dir	OK	15.6223	15.4516	-0.0158488	-0.0580826	0.92765	0.978039	no	AT1G06200	Peptidase S24/S26A/S26B/S26C family protein
AT1G06210	AT1G06210	-	1:1897202-1899208	Col0Mockb_dir	dek2_1Mocka_dir	OK	12.8637	12.8104	-0.00598779	-0.0211487	0.97495	0.993132	no	AT1G06210	ENTH/VHS/GAT family protein
AT1G06220	AT1G06220	-	1:1899963-1904873	Col0Mockb_dir	dek2_1Mocka_dir	OK	8.04344	7.97037	-0.0131661	-0.0494126	0.94155	0.982605	no	MEE5	Ribosomal protein S5/Elongation factor G/III/V family protein
AT1G06225	AT1G06225	-	1:1905974-1906226	Col0Mockb_dir	dek2_1Mocka_dir	NOTEST	0	0.323562	inf	0	1	1	no	CLE3	CLAVATA3/ESR-RELATED 3
AT1G06230	AT1G06230	-	1:1906962-1910848	Col0Mockb_dir	dek2_1Mocka_dir	OK	10.016	9.02932	-0.149613	-0.567974	0.39205	0.737109	no	GTE4	global transcription factor group E4
AT1G06240	AT1G06240	-	1:1911121-1913205	Col0Mockb_dir	dek2_1Mocka_dir	OK	3.95931	4.20244	0.0859802	0.219355	0.7309	0.911773	no	AT1G06240	diiron containing four-helix bundle family ferritin protein, putative (Protein of unknown function DUF455)
AT1G06250	AT1G06250	-	1:1913255-1914895	Col0Mockb_dir	dek2_1Mocka_dir	OK	6.01502	3.57516	-0.75056	-1.94553	0.00425	0.0841432	no	AT1G06250	alpha/beta-Hydrolases superfamily protein
AT1G06260	AT1G06260	-	1:1916429-1917585	Col0Mockb_dir	dek2_1Mocka_dir	OK	2.41668	1.77537	-0.444908	-0.704926	0.2833	0.65191	no	AT1G06260	Cysteine proteinases superfamily protein
AT1G06270	AT1G06270	-	1:1918087-1919760	Col0Mockb_dir	dek2_1Mocka_dir	OK	2.29074	2.4368	0.0891742	0.166955	0.7945	0.93462	no	AT1G06270	Pentatricopeptide repeat (PPR) superfamily protein
AT1G06280	AT1G06280	-	1:1920306-1920949	Col0Mockb_dir	dek2_1Mocka_dir	NOTEST	0	0	0	0	1	1	no	LBD2	LOB domain-containing protein 2
AT1G06290	AT1G06290	-	1:1922351-1926278	Col0Mockb_dir	dek2_1Mocka_dir	OK	9.81259	10.0382	0.0327879	0.120693	0.8506	0.953899	no	ACX3	acyl-CoA oxidase 3
AT1G06310	AT1G06310	-	1:1926790-1930258	Col0Mockb_dir	dek2_1Mocka_dir	NOTEST	0.186343	0.197377	0.0829928	0	1	1	no	ACX6	acyl-CoA oxidase 6
AT1G06320	AT1G06320	-	1:1930522-1931449	Col0Mockb_dir	dek2_1Mocka_dir	OK	0.57894	0.500617	-0.209707	-0.164015	0.80415	0.93707	no	AT1G06320	hypothetical protein
AT1G06330	AT1G06330	-	1:1931670-1932266	Col0Mockb_dir	dek2_1Mocka_dir	NOTEST	0.119147	0.278975	1.22739	0	1	1	no	AT1G06330	Heavy metal transport/detoxification superfamily protein
AT1G06340	AT1G06340	-	1:1933283-1934014	Col0Mockb_dir	dek2_1Mocka_dir	NOTEST	0	0	0	0	1	1	no	AT1G06340	Plant Tudor-like protein
AT1G06350	AT1G06350	-	1:1935292-1936819	Col0Mockb_dir	dek2_1Mocka_dir	OK	0.826935	0.825359	-0.0027535	-0.00308024	0.9932	0.997653	no	ADS4	Fatty acid desaturase family protein
AT1G06360	AT1G06360	-	1:1938962-1940459	Col0Mockb_dir	dek2_1Mocka_dir	OK	13.2814	15.0388	0.179283	0.588493	0.36175	0.712345	no	AT1G06360	Fatty acid desaturase family protein
AT1G06380	AT1G06380	-	1:1945123-1946076	Col0Mockb_dir	dek2_1Mocka_dir	OK	12.4224	9.65086	-0.36422	-1.07041	0.11515	0.450411	no	AT1G06380	Ribosomal protein L1p/L10e family
AT1G06390	AT1G06390	-	1:1946787-1952785	Col0Mockb_dir	dek2_1Mocka_dir	OK	8.29372	7.50069	-0.144997	-0.295321	0.67025	0.886851	no	GSK1	GSK3/SHAGGY-like protein kinase 1
AT1G06400	AT1G06400	-	1:1946787-1952785	Col0Mockb_dir	dek2_1Mocka_dir	OK	42.0022	42.6836	0.0232167	0.0769688	0.90965	0.971381	no	ARA-2	Ras-related small GTP-binding family protein
AT1G06410	AT1G06410	-	1:1954849-1958756	Col0Mockb_dir	dek2_1Mocka_dir	OK	11.2094	15.2217	0.441414	1.68079	0.00985	0.136945	no	TPS7	trehalose-phosphatase/synthase 7
AT1G06420	AT1G06420	-	1:1958922-1959947	Col0Mockb_dir	dek2_1Mocka_dir	OK	2.21306	1.84457	-0.262754	-0.442036	0.54825	0.828932	no	AT1G06420	DNA ligase-like protein
AT1G06430	AT1G06430	-	1:1960057-1963011	Col0Mockb_dir	dek2_1Mocka_dir	OK	72.0056	68.4412	-0.0732431	-0.283263	0.6683	0.885802	no	FTSH8	FTSH protease 8
AT1G06440	AT1G06440	-	1:1963379-1965051	Col0Mockb_dir	dek2_1Mocka_dir	OK	0.978369	0.999906	0.0314143	0.0420882	0.95065	0.985295	no	AT1G06440	Ubiquitin carboxyl-terminal hydrolase family protein
AT1G06450	AT1G06450	-	1:1965839-1969561	Col0Mockb_dir	dek2_1Mocka_dir	OK	2.70582	3.15118	0.219829	0.315918	0.65035	0.878062	no	AT1G06450	Polynucleotidyl transferase, ribonuclease H-like superfamily protein
AT1G06460	AT1G06460	-	1:1965839-1969561	Col0Mockb_dir	dek2_1Mocka_dir	OK	8.59877	7.82352	-0.136312	-0.408351	0.5341	0.82223	no	ACD32.1	alpha-crystallin domain 32.1
AT1G06470	AT1G06470	-	1:1969728-1973767	Col0Mockb_dir	dek2_1Mocka_dir	OK	4.45417	4.47032	0.00522358	0.0163106	0.97875	0.993806	no	AT1G06470	Nucleotide/sugar transporter family protein
AT1G06475	AT1G06475	-	1:1973833-1974386	Col0Mockb_dir	dek2_1Mocka_dir	OK	6.27966	7.44131	0.244869	0.502377	0.49205	0.799967	no	AT1G06475	transmembrane protein
AT1G06490	AT1G06490	-	1:1978761-1989409	Col0Mockb_dir	dek2_1Mocka_dir	OK	0.701912	0.775381	0.143615	0.350799	0.5881	0.848957	no	CalS7	glucan synthase-like 7
AT1G06500	AT1G06500	-	1:1989478-1992228	Col0Mockb_dir	dek2_1Mocka_dir	OK	17.3004	14.4331	-0.261423	-0.702114	0.27515	0.643555	no	AT1G06500	hypothetical protein
AT1G06510	AT1G06510	-	1:1992332-1993840	Col0Mockb_dir	dek2_1Mocka_dir	OK	8.17874	6.80423	-0.265448	-0.743555	0.25165	0.619524	no	AT1G06510	forkhead-associated domain protein
AT1G06515	AT1G06515	-	1:1989478-1992228	Col0Mockb_dir	dek2_1Mocka_dir	OK	11.5263	11.9115	0.0474268	0.107082	0.87585	0.96009	no	AT1G06515	transmembrane protein, putative (DUF3317)
AT1G06520	AT1G06520	-	1:1993977-1996112	Col0Mockb_dir	dek2_1Mocka_dir	OK	1.03169	1.32622	0.362316	0.573205	0.3699	0.718808	no	GPAT1	glycerol-3-phosphate acyltransferase 1
AT1G06530	AT1G06530	-	1:2001593-2002596	Col0Mockb_dir	dek2_1Mocka_dir	OK	37.2181	41.388	0.153209	0.71271	0.36375	0.713718	no	PMD2	Tropomyosin-like protein
AT1G06540	AT1G06540	-	1:2002876-2003393	Col0Mockb_dir	dek2_1Mocka_dir	OK	4.61167	4.12262	-0.161729	-0.22896	0.7235	0.909088	no	AT1G06540	hypothetical protein
AT1G06550	AT1G06550	-	1:2003626-2007190	Col0Mockb_dir	dek2_1Mocka_dir	OK	10.2184	9.47972	-0.108251	-0.391544	0.53845	0.82451	no	AT1G06550	ATP-dependent caseinolytic (Clp) protease/crotonase family protein
AT1G06560	AT1G06560	-	1:2007614-2013545	Col0Mockb_dir	dek2_1Mocka_dir	OK	1.62852	1.69403	0.0568968	0.0658835	0.9163	0.974095	no	AT1G06560	NOL1/NOP2/sun family protein
AT1G06570	AT1G06570	-	1:2007614-2013545	Col0Mockb_dir	dek2_1Mocka_dir	OK	31.4652	29.0088	-0.117269	-0.456963	0.52005	0.8149	no	PDS1	4-hydroxyphenylpyruvate dioxygenase
AT1G06580	AT1G06580	-	1:2014002-2016054	Col0Mockb_dir	dek2_1Mocka_dir	OK	2.3519	1.88288	-0.320885	-0.617291	0.33305	0.690462	no	AT1G06580	Pentatricopeptide repeat (PPR) superfamily protein
AT1G06590	AT1G06590	-	1:2016307-2024662	Col0Mockb_dir	dek2_1Mocka_dir	OK	1.53139	1.2903	-0.247136	-0.684461	0.28535	0.653424	no	AT1G06590	anaphase-promoting complex subunit
AT1G06620	AT1G06620	-	1:2025600-2027271	Col0Mockb_dir	dek2_1Mocka_dir	OK	3.70691	6.8408	0.883946	2.23818	0.00155	0.0432806	yes	AT1G06620	2-oxoglutarate (2OG) and Fe(II)-dependent oxygenase superfamily protein
AT1G06630	AT1G06630	-	1:2027738-2031388	Col0Mockb_dir	dek2_1Mocka_dir	OK	7.43363	6.45516	-0.203615	-0.694544	0.2872	0.655438	no	AT1G06630	F-box/RNI-like superfamily protein
AT1G06640	AT1G06640	-	1:2032337-2034018	Col0Mockb_dir	dek2_1Mocka_dir	OK	72.6023	72.2195	-0.00762656	-0.0301773	0.96375	0.988899	no	AT1G06640	2-oxoglutarate (2OG) and Fe(II)-dependent oxygenase superfamily protein
AT1G06645	AT1G06645	-	1:2034155-2035626	Col0Mockb_dir	dek2_1Mocka_dir	OK	11.8181	11.2205	-0.0748605	-0.240867	0.7111	0.903467	no	AT1G06645	2-oxoglutarate (2OG) and Fe(II)-dependent oxygenase superfamily protein
AT1G06650	AT1G06650	-	1:2035838-2040246	Col0Mockb_dir	dek2_1Mocka_dir	OK	46.3799	37.4542	-0.308371	-1.17658	0.06975	0.358271	no	AT1G06650	2-oxoglutarate (2OG) and Fe(II)-dependent oxygenase superfamily protein
AT1G06660	AT1G06660	-	1:2035838-2040246	Col0Mockb_dir	dek2_1Mocka_dir	OK	1.2193	1.23046	0.0131377	0.0100007	0.98735	0.99564	no	JASON	aspartyl/glutamyl-tRNA(Asn/Gln) amidotransferase subunit
AT1G06670	AT1G06670	-	1:2040432-2047612	Col0Mockb_dir	dek2_1Mocka_dir	OK	10.074	10.0422	-0.00456004	-0.0176673	0.97825	0.993806	no	NIH	nuclear DEIH-boxhelicase
AT1G06680	AT1G06680	-	1:2047824-2049418	Col0Mockb_dir	dek2_1Mocka_dir	OK	2096.88	2069.32	-0.0190847	-0.0588964	0.928	0.978039	no	PSBP-1	photosystem II subunit P-1
AT1G06690	AT1G06690	-	1:2049601-2052154	Col0Mockb_dir	dek2_1Mocka_dir	OK	37.9085	32.3104	-0.230523	-0.900878	0.17045	0.530067	no	AT1G06690	NAD(P)-linked oxidoreductase superfamily protein
AT1G06700	AT1G06700	-	1:2052480-2055548	Col0Mockb_dir	dek2_1Mocka_dir	OK	19.611	17.1124	-0.196617	-0.748915	0.24845	0.616059	no	AT1G06700	Protein kinase superfamily protein
AT1G06710	AT1G06710	-	1:2056574-2060242	Col0Mockb_dir	dek2_1Mocka_dir	OK	0.673372	0.883939	0.392542	0.629778	0.31635	0.678617	no	AT1G06710	Tetratricopeptide repeat (TPR)-like superfamily protein
AT1G06720	AT1G06720	-	1:2060443-2067323	Col0Mockb_dir	dek2_1Mocka_dir	OK	3.96339	4.06077	0.0350186	0.122873	0.8488	0.953221	no	AT1G06720	P-loop containing nucleoside triphosphate hydrolases superfamily protein
AT1G06730	AT1G06730	-	1:2067528-2070446	Col0Mockb_dir	dek2_1Mocka_dir	OK	5.16579	4.21906	-0.292068	-0.878602	0.1716	0.531385	no	AT1G06730	pfkB-like carbohydrate kinase family protein
AT1G06750	AT1G06750	-	1:2072978-2077698	Col0Mockb_dir	dek2_1Mocka_dir	OK	1.04088	1.1771	0.177437	0.092184	0.88945	0.964956	no	AT1G06750	P-loop containing nucleoside triphosphate hydrolases superfamily protein
AT1G06760	AT1G06760	-	1:2072978-2077698	Col0Mockb_dir	dek2_1Mocka_dir	OK	155.199	146.926	-0.0790275	-0.329797	0.64265	0.876222	no	AT1G06760	winged-helix DNA-binding transcription factor family protein
AT1G06770	AT1G06770	-	1:2078910-2081939	Col0Mockb_dir	dek2_1Mocka_dir	OK	1.89546	2.57909	0.444317	1.0216	0.11285	0.446053	no	DRIP1	DREB2A-interacting protein 1
AT1G06780	AT1G06780	-	1:2083310-2087131	Col0Mockb_dir	dek2_1Mocka_dir	OK	4.99214	5.13308	0.0401654	0.129953	0.8384	0.949834	no	GAUT6	galacturonosyltransferase 6
AT1G06790	AT1G06790	-	1:2087231-2091686	Col0Mockb_dir	dek2_1Mocka_dir	OK	2.57741	2.94491	0.192302	0.33581	0.6086	0.859018	no	AT1G06790	RNA polymerase Rpb7 N-terminal domain-containing protein
AT1G06800	AT1G06800	-	1:2087231-2091686	Col0Mockb_dir	dek2_1Mocka_dir	OK	4.31628	2.94654	-0.550765	-1.45135	0.04205	0.289786	no	PLA-I{gamma}1	alpha/beta-Hydrolases superfamily protein
AT1G06810	AT1G06810	-	1:2091737-2092528	Col0Mockb_dir	dek2_1Mocka_dir	NOTEST	0.554149	0.217009	-1.35252	0	1	1	no	AT1G06810	endonuclease/glycosyl hydrolase
AT1G06820	AT1G06820	-	1:2092945-2096232	Col0Mockb_dir	dek2_1Mocka_dir	OK	5.30871	4.48931	-0.241866	-0.739246	0.24765	0.615712	no	CRTISO	carotenoid isomerase
AT1G06830	AT1G06830	-	1:2097150-2097655	Col0Mockb_dir	dek2_1Mocka_dir	OK	41.3849	21.0549	-0.974948	-2.81378	0.00015	0.00803911	yes	AT1G06830	Glutaredoxin family protein
AT1G06840	AT1G06840	-	1:2097746-2103479	Col0Mockb_dir	dek2_1Mocka_dir	OK	3.72642	3.41434	-0.126181	-0.41154	0.5214	0.816088	no	AT1G06840	Leucine-rich repeat protein kinase family protein
AT1G06850	AT1G06850	-	1:2105047-2106749	Col0Mockb_dir	dek2_1Mocka_dir	OK	9.06019	6.81682	-0.410443	-1.27697	0.0591	0.333877	no	bZIP52	basic leucine-zipper 52
AT1G06870	AT1G06870	-	1:2108592-2110986	Col0Mockb_dir	dek2_1Mocka_dir	OK	9.57994	9.62661	0.00701153	0.0240851	0.969	0.990769	no	Plsp2A	Peptidase S24/S26A/S26B/S26C family protein
AT1G06890	AT1G06890	-	1:2111362-2114601	Col0Mockb_dir	dek2_1Mocka_dir	OK	7.21064	7.35973	0.0295251	0.10002	0.8791	0.960573	no	AT1G06890	nodulin MtN21 /EamA-like transporter family protein
AT1G06900	AT1G06900	-	1:2114926-2120745	Col0Mockb_dir	dek2_1Mocka_dir	OK	6.79183	7.05585	0.0550197	0.202206	0.75645	0.922637	no	AT1G06900	Insulinase (Peptidase family M16) family protein
AT1G06910	AT1G06910	-	1:2120990-2123748	Col0Mockb_dir	dek2_1Mocka_dir	OK	1.41154	1.26111	-0.162579	-0.295596	0.6412	0.876129	no	TRFL7	TRF-like 7
AT1G06920	AT1G06920	-	1:2124853-2125801	Col0Mockb_dir	dek2_1Mocka_dir	NOTEST	0	0	0	0	1	1	no	OFP4	ovate family protein 4
AT1G06923	AT1G06923	-	1:2126748-2128611	Col0Mockb_dir	dek2_1Mocka_dir	OK	0.423081	0.969042	1.19562	1.13218	0.07905	0.381311	no	AT1G06923	transcription repressor OFP17-like protein
AT1G06925	AT1G06925	-	1:2126748-2128611	Col0Mockb_dir	dek2_1Mocka_dir	NOTEST	0	0.0368482	inf	0	1	1	no	AT1G06925	endonuclease/glycosyl hydrolase
AT1G06930	AT1G06930	-	1:2128842-2129883	Col0Mockb_dir	dek2_1Mocka_dir	OK	0.695263	1.40565	1.01561	0.970067	0.15035	0.503271	no	AT1G06930	TPRXL
AT1G06950	AT1G06950	-	1:2130141-2135665	Col0Mockb_dir	dek2_1Mocka_dir	OK	29.3611	27.9635	-0.0703612	-0.270701	0.6761	0.887854	no	TIC110	translocon at the inner envelope membrane of chloroplasts 110
AT1G06960	AT1G06960	-	1:2135850-2137732	Col0Mockb_dir	dek2_1Mocka_dir	OK	16.8125	14.3363	-0.229862	-0.797792	0.2127	0.579951	no	AT1G06960	RNA-binding (RRM/RBD/RNP motifs) family protein
AT1G06970	AT1G06970	-	1:2138108-2140818	Col0Mockb_dir	dek2_1Mocka_dir	NOTEST	0	0.0296922	inf	0	1	1	no	CHX14	cation/hydrogen exchanger 14
AT1G06980	AT1G06980	-	1:2143030-2143821	Col0Mockb_dir	dek2_1Mocka_dir	OK	5.39347	2.69445	-1.00122	-1.92896	0.01595	0.179658	no	AT1G06980	6,7-dimethyl-8-ribityllumazine synthase
AT1G06990	AT1G06990	-	1:2148386-2150152	Col0Mockb_dir	dek2_1Mocka_dir	NOTEST	0	0.0273434	inf	0	1	1	no	AT1G06990	GDSL-like Lipase/Acylhydrolase superfamily protein
AT1G07000	AT1G07000	-	1:2150193-2152325	Col0Mockb_dir	dek2_1Mocka_dir	OK	3.73874	2.76281	-0.436416	-1.18615	0.09845	0.42075	no	EXO70B2	exocyst subunit exo70 family protein B2
AT1G07010	AT1G07010	-	1:2152851-2156008	Col0Mockb_dir	dek2_1Mocka_dir	OK	40.0358	30.0665	-0.413131	-1.46309	0.02205	0.206003	no	SLP1	Calcineurin-like metallo-phosphoesterase superfamily protein
AT1G07020	AT1G07020	-	1:2152851-2156008	Col0Mockb_dir	dek2_1Mocka_dir	OK	24.749	17.6392	-0.488583	-0.806443	0.2312	0.598628	no	AT1G07020	hypothetical protein
AT1G07025	AT1G07025	-	1:2157657-2158158	Col0Mockb_dir	dek2_1Mocka_dir	NOTEST	0	0	0	0	1	1	no	AT1G07025	Mitochondrial substrate carrier family protein
AT1G07030	AT1G07030	-	1:2158419-2160809	Col0Mockb_dir	dek2_1Mocka_dir	OK	15.6852	12.2913	-0.351766	-1.32229	0.049	0.309345	no	AT1G07030	Mitochondrial substrate carrier family protein
AT1G07040	AT1G07040	-	1:2160937-2163308	Col0Mockb_dir	dek2_1Mocka_dir	OK	5.04642	3.60141	-0.486698	-1.30513	0.04785	0.306551	no	AT1G07040	plant/protein
AT1G07050	AT1G07050	-	1:2164187-2165239	Col0Mockb_dir	dek2_1Mocka_dir	OK	1.5113	0.952761	-0.665603	-0.731647	0.25965	0.629118	no	AT1G07050	CCT motif family protein
AT1G07060	AT1G07060	-	1:2167106-2168397	Col0Mockb_dir	dek2_1Mocka_dir	NOTEST	0	0.0783066	inf	0	1	1	no	DFO	hypothetical protein
AT1G07070	AT1G07070	-	1:2168563-2169851	Col0Mockb_dir	dek2_1Mocka_dir	OK	23.0009	22.7814	-0.0138343	-0.0476929	0.94065	0.982077	no	AT1G07070	Ribosomal protein L35Ae family protein
AT1G07080	AT1G07080	-	1:2169981-2172194	Col0Mockb_dir	dek2_1Mocka_dir	OK	45.0097	35.6718	-0.335449	-1.31338	0.0459	0.302415	no	AT1G07080	Thioredoxin superfamily protein
AT1G07090	AT1G07090	-	1:2173951-2174894	Col0Mockb_dir	dek2_1Mocka_dir	OK	15.3602	11.0037	-0.481204	-1.60231	0.02455	0.217245	no	LSH6	LIGHT-DEPENDENT SHORT HYPOCOTYLS-like protein (DUF640)
AT1G07110	AT1G07110	-	1:2178103-2184148	Col0Mockb_dir	dek2_1Mocka_dir	OK	7.04523	6.31619	-0.157591	-0.586843	0.36995	0.718808	no	F2KP	fructose-2,6-bisphosphatase
AT1G07120	AT1G07120	-	1:2184758-2186580	Col0Mockb_dir	dek2_1Mocka_dir	NOTEST	0.289748	0.445088	0.61929	0	1	1	no	AT1G07120	CHUP1-like protein
AT1G07130	AT1G07130	-	1:2187775-2188733	Col0Mockb_dir	dek2_1Mocka_dir	OK	8.94359	8.67432	-0.0441039	-0.125444	0.861	0.956638	no	STN1	Nucleic acid-binding, OB-fold-like protein
AT1G07135	AT1G07135	-	1:2189927-2190659	Col0Mockb_dir	dek2_1Mocka_dir	OK	3.90461	29.8588	2.93491	7.48027	5e-05	0.00323653	yes	AT1G07135	glycine-rich protein
AT1G07140	AT1G07140	-	1:2191722-2193793	Col0Mockb_dir	dek2_1Mocka_dir	OK	57.5756	67.1858	0.222699	0.86848	0.17245	0.532291	no	SIRANBP	Pleckstrin homology (PH) domain superfamily protein
AT1G07150	AT1G07150	-	1:2193940-2195798	Col0Mockb_dir	dek2_1Mocka_dir	OK	3.41045	2.79419	-0.287534	-0.724717	0.28365	0.652114	no	MAPKKK13	mitogen-activated protein kinase kinase kinase 13
AT1G07160	AT1G07160	-	1:2197907-2199748	Col0Mockb_dir	dek2_1Mocka_dir	NOTEST	0.0984914	0.138165	0.488324	0	1	1	no	AT1G07160	Protein phosphatase 2C family protein
AT1G07170	AT1G07170	-	1:2200122-2201265	Col0Mockb_dir	dek2_1Mocka_dir	OK	25.1447	21.3635	-0.235103	-0.787087	0.22295	0.590849	no	AT1G07170	PHF5-like protein
AT1G07175	AT1G07175	-	1:2202329-2202774	Col0Mockb_dir	dek2_1Mocka_dir	OK	0	0.55168	inf	#NAME?	0.00895	0.130245	no	AT1G07175	alternative NAD(P)H dehydrogenase
AT1G07180	AT1G07180	-	1:2204319-2206934	Col0Mockb_dir	dek2_1Mocka_dir	OK	53.2126	52.9367	-0.00750077	-0.0290406	0.96305	0.988536	no	NDA1	alternative NAD(P)H dehydrogenase 1
AT1G07190	AT1G07190	-	1:2208012-2208177	Col0Mockb_dir	dek2_1Mocka_dir	NOTEST	0	0	0	0	1	1	no	AT1G07190	Lon protease
AT1G07200	AT1G07200	-	1:2208718-2212546	Col0Mockb_dir	dek2_1Mocka_dir	OK	6.88244	5.64266	-0.286545	-1.04314	0.11975	0.458333	no	AT1G07200	Double Clp-N motif-containing P-loop nucleoside triphosphate hydrolases superfamily protein
AT1G07210	AT1G07210	-	1:2215222-2219474	Col0Mockb_dir	dek2_1Mocka_dir	OK	19.0308	17.7365	-0.101616	-0.291668	0.64925	0.877741	no	AT1G07210	Ribosomal protein S18
AT1G07220	AT1G07220	-	1:2215222-2219474	Col0Mockb_dir	dek2_1Mocka_dir	OK	5.92526	4.77745	-0.310639	-0.577098	0.37295	0.721403	no	AT1G07220	O-glucosyltransferase rumi-like protein (DUF821)
AT1G07230	AT1G07230	-	1:2220252-2222982	Col0Mockb_dir	dek2_1Mocka_dir	OK	11.6593	9.39643	-0.311292	-1.13146	0.0852	0.394721	no	NPC1	non-specific phospholipase C1
AT1G07240	AT1G07240	-	1:2223690-2225452	Col0Mockb_dir	dek2_1Mocka_dir	OK	16.1903	11.2278	-0.528047	-1.97849	0.0051	0.0941469	no	UGT71C5	UDP-glucosyl transferase 71C5
AT1G07250	AT1G07250	-	1:2225899-2227566	Col0Mockb_dir	dek2_1Mocka_dir	OK	21.9021	16.0891	-0.44499	-1.81792	0.01235	0.156232	no	UGT71C4	UDP-glucosyl transferase 71C4
AT1G07260	AT1G07260	-	1:2227593-2229319	Col0Mockb_dir	dek2_1Mocka_dir	OK	5.89835	3.99145	-0.563399	-1.64076	0.022	0.205632	no	UGT71C3	UDP-glucosyl transferase 71C3
AT1G07270	AT1G07270	-	1:2229756-2232897	Col0Mockb_dir	dek2_1Mocka_dir	NOTEST	0.0108296	0.068952	2.67061	0	1	1	no	AT1G07270	Cell division control, Cdc6
AT1G07280	AT1G07280	-	1:2238086-2241217	Col0Mockb_dir	dek2_1Mocka_dir	OK	27.0841	22.7124	-0.253971	-0.987761	0.12805	0.471543	no	AT1G07280	Tetratricopeptide repeat (TPR)-like superfamily protein
AT1G07290	AT1G07290	-	1:2242255-2244428	Col0Mockb_dir	dek2_1Mocka_dir	NOTEST	0.15007	0.301719	1.00757	0	1	1	no	GONST2	golgi nucleotide sugar transporter 2
AT1G07300	AT1G07300	-	1:2245757-2246492	Col0Mockb_dir	dek2_1Mocka_dir	OK	24.1952	10.413	-1.21633	-3.25538	5e-05	0.00323653	yes	AT1G07300	josephin protein-like protein
AT1G07310	AT1G07310	-	1:2247508-2248961	Col0Mockb_dir	dek2_1Mocka_dir	OK	14.0008	11.7909	-0.24783	-0.910887	0.2073	0.575138	no	AT1G07310	Calcium-dependent lipid-binding (CaLB domain) family protein
AT1G07320	AT1G07320	-	1:2249132-2250529	Col0Mockb_dir	dek2_1Mocka_dir	OK	188.896	187.983	-0.00699113	-0.0279427	0.9672	0.990196	no	RPL4	ribosomal protein L4
AT1G07330	AT1G07330	-	1:2251130-2253585	Col0Mockb_dir	dek2_1Mocka_dir	NOTEST	0.194751	0.249688	0.3585	0	1	1	no	AT1G07330	dentin sialophosphoprotein
AT1G07340	AT1G07340	-	1:2254821-2256850	Col0Mockb_dir	dek2_1Mocka_dir	NOTEST	0.0252234	0	#NAME?	0	1	1	no	STP2	sugar transporter 2
AT1G07350	AT1G07350	-	1:2257424-2260101	Col0Mockb_dir	dek2_1Mocka_dir	OK	23.1989	18.7865	-0.30436	-1.17416	0.06735	0.353046	no	SR45a	RNA-binding (RRM/RBD/RNP motifs) family protein
AT1G07360	AT1G07360	-	1:2260388-2262865	Col0Mockb_dir	dek2_1Mocka_dir	OK	19.323	17.8937	-0.110868	-0.428887	0.51785	0.814804	no	MAC5A	CCCH-type zinc fingerfamily protein with RNA-binding domain-containing protein
AT1G07370	AT1G07370	-	1:2263139-2264551	Col0Mockb_dir	dek2_1Mocka_dir	OK	10.9707	12.9295	0.237005	0.739445	0.24955	0.617374	no	PCNA1	proliferating cellular nuclear antigen 1
AT1G07380	AT1G07380	-	1:2264828-2268306	Col0Mockb_dir	dek2_1Mocka_dir	OK	1.7043	2.09045	0.294636	0.685148	0.2871	0.655435	no	AT1G07380	Neutral/alkaline non-lysosomal ceramidase
AT1G07390	AT1G07390	-	1:2269892-2274820	Col0Mockb_dir	dek2_1Mocka_dir	OK	0.96217	0.807817	-0.252263	-0.485878	0.46	0.780593	no	RLP1	receptor like protein 1
AT1G07400	AT1G07400	-	1:2274942-2275758	Col0Mockb_dir	dek2_1Mocka_dir	OK	2.91336	1.67487	-0.798629	-1.25483	0.0549	0.322398	no	AT1G07400	HSP20-like chaperones superfamily protein
AT1G07410	AT1G07410	-	1:2276052-2277154	Col0Mockb_dir	dek2_1Mocka_dir	OK	0.798964	1.95661	1.29215	1.3819	0.045	0.299255	no	RABA2b	RAB GTPase homolog A2B
AT1G07420	AT1G07420	-	1:2277806-2280297	Col0Mockb_dir	dek2_1Mocka_dir	OK	8.55811	7.78444	-0.1367	-0.447984	0.5024	0.805432	no	SMO2-1	sterol 4-alpha-methyl-oxidase 2-1
AT1G07430	AT1G07430	-	1:2280834-2282828	Col0Mockb_dir	dek2_1Mocka_dir	NOTEST	0.171204	0.1811	0.0810675	0	1	1	no	HAI2	highly ABA-induced PP2C protein 2
AT1G07440	AT1G07440	-	1:2286148-2287730	Col0Mockb_dir	dek2_1Mocka_dir	OK	34.0018	34.2612	0.0109669	0.041291	0.9494	0.985125	no	AT1G07440	NAD(P)-binding Rossmann-fold superfamily protein
AT1G07450	AT1G07450	-	1:2287925-2289336	Col0Mockb_dir	dek2_1Mocka_dir	OK	5.74128	6.182	0.106702	0.255426	0.6938	0.896235	no	AT1G07450	NAD(P)-binding Rossmann-fold superfamily protein
AT1G07460	AT1G07460	-	1:2290200-2290977	Col0Mockb_dir	dek2_1Mocka_dir	NOTEST	0.23943	0.0621559	-1.94564	0	1	1	no	AT1G07460	Concanavalin A-like lectin family protein
AT1G07470	AT1G07470	-	1:2291456-2295489	Col0Mockb_dir	dek2_1Mocka_dir	OK	2.46291	2.36272	-0.0599147	-0.144981	0.8225	0.944215	no	AT1G07470	Transcription factor IIA, alpha/beta subunit
AT1G07473	AT1G07473	-	1:2291456-2295489	Col0Mockb_dir	dek2_1Mocka_dir	NOTEST	0.091537	0.322723	1.81787	0	1	1	no	AT1G07473	hypothetical protein
AT1G07476	AT1G07476	-	1:2295750-2299470	Col0Mockb_dir	dek2_1Mocka_dir	NOTEST	0	0.0152313	inf	0	1	1	no	AT1G07476	transmembrane protein
AT1G07480	AT1G07480	-	1:2295750-2299470	Col0Mockb_dir	dek2_1Mocka_dir	OK	3.23074	3.90802	0.274573	0.789298	0.22005	0.588222	no	AT1G07480	Transcription factor IIA, alpha/beta subunit
AT1G07485	AT1G07485	-	1:2301374-2302121	Col0Mockb_dir	dek2_1Mocka_dir	NOTEST	0.325222	0.441832	0.442073	0	1	1	no	AT1G07485	hypothetical protein
AT1G07490	AT1G07490	-	1:2301374-2302121	Col0Mockb_dir	dek2_1Mocka_dir	OK	16.3753	12.8336	-0.351588	-0.859153	0.18775	0.551521	no	RTFL3	ROTUNDIFOLIA like 3
AT1G07500	AT1G07500	-	1:2304765-2305031	Col0Mockb_dir	dek2_1Mocka_dir	OK	2.619	4.84968	0.888876	0.823454	0.22845	0.596309	no	AT1G07500	hypothetical protein
AT1G07510	AT1G07510	-	1:2305377-2309544	Col0Mockb_dir	dek2_1Mocka_dir	OK	14.4751	12.8445	-0.172424	-0.672954	0.30115	0.6663	no	ftsh10	FTSH protease 10
AT1G07520	AT1G07520	-	1:2309563-2311805	Col0Mockb_dir	dek2_1Mocka_dir	OK	2.42362	3.92193	0.694397	1.75834	0.0089	0.130087	no	AT1G07520	GRAS family transcription factor
AT1G07530	AT1G07530	-	1:2313581-2316469	Col0Mockb_dir	dek2_1Mocka_dir	OK	15.4175	13.7485	-0.165298	-0.631335	0.3343	0.69081	no	SCL14	SCARECROW-like 14
AT1G07540	AT1G07540	-	1:2318432-2321048	Col0Mockb_dir	dek2_1Mocka_dir	NOTEST	0	0.00880394	inf	0	1	1	no	TRFL2	TRF-like 2
AT1G07550	AT1G07550	-	1:2322652-2326561	Col0Mockb_dir	dek2_1Mocka_dir	OK	0.491438	0.319549	-0.620971	-0.744596	0.25955	0.629118	no	AT1G07550	Leucine-rich repeat protein kinase family protein
AT1G07560	AT1G07560	-	1:2327319-2331096	Col0Mockb_dir	dek2_1Mocka_dir	OK	1.73074	1.3245	-0.385947	-0.802478	0.215	0.582874	no	AT1G07560	Leucine-rich repeat protein kinase family protein
AT1G07570	AT1G07570	-	1:2331169-2333738	Col0Mockb_dir	dek2_1Mocka_dir	OK	10.0536	11.947	0.248926	0.87332	0.183	0.545809	no	APK1A	Protein kinase superfamily protein
AT1G07590	AT1G07590	-	1:2336522-2339391	Col0Mockb_dir	dek2_1Mocka_dir	OK	279.505	324.401	0.214904	0.744487	0.2442	0.612549	no	AT1G07590	Tetratricopeptide repeat (TPR)-like superfamily protein
AT1G07600	AT1G07600	-	1:2336522-2339391	Col0Mockb_dir	dek2_1Mocka_dir	NOTEST	0	0	0	0	1	1	no	MT1A	metallothionein 1A
AT1G07610	AT1G07610	-	1:2341541-2342123	Col0Mockb_dir	dek2_1Mocka_dir	OK	345.915	397.394	0.200156	0.774742	0.2307	0.598084	no	MT1C	metallothionein 1C
AT1G07615	AT1G07615	-	1:2342197-2344271	Col0Mockb_dir	dek2_1Mocka_dir	OK	4.67122	4.50229	-0.0531423	-0.15021	0.8174	0.941341	no	AT1G07615	GTP-binding protein Obg/CgtA
AT1G07620	AT1G07620	-	1:2344389-2346842	Col0Mockb_dir	dek2_1Mocka_dir	OK	0.584606	1.10429	0.917585	1.28039	0.0529	0.31703	no	ATOBGM	GTP-binding protein Obg/CgtA
AT1G07630	AT1G07630	-	1:2349096-2351692	Col0Mockb_dir	dek2_1Mocka_dir	OK	3.88028	3.69747	-0.069622	-0.195644	0.76615	0.925017	no	PLL5	pol-like 5
AT1G07640	AT1G07640	-	1:2354353-2356227	Col0Mockb_dir	dek2_1Mocka_dir	OK	13.8215	12.5365	-0.140789	-0.496796	0.4511	0.774841	no	OBP2	Dof-type zinc finger DNA-binding family protein
AT1G07645	AT1G07645	-	1:2367436-2368385	Col0Mockb_dir	dek2_1Mocka_dir	NOTEST	0	0	0	0	1	1	no	DSI-1VOC	dessication-induced 1VOC superfamily protein
AT1G07650	AT1G07650	-	1:2359548-2366561	Col0Mockb_dir	dek2_1Mocka_dir	OK	3.95658	3.96698	0.00378736	0.0131034	0.98525	0.994982	no	AT1G07650	Leucine-rich repeat transmembrane protein kinase
AT1G07660	AT1G07660	-	1:2368836-2369734	Col0Mockb_dir	dek2_1Mocka_dir	OK	44.9521	41.3883	-0.119166	-0.437998	0.4914	0.799579	no	AT1G07660	Histone superfamily protein
AT1G07670	AT1G07670	-	1:2370051-2374545	Col0Mockb_dir	dek2_1Mocka_dir	OK	10.5189	12.7785	0.280735	1.08465	0.0996	0.423035	no	ECA4	endomembrane-type CA-ATPase 4
AT1G07680	AT1G07680	-	1:2376011-2377186	Col0Mockb_dir	dek2_1Mocka_dir	NOTEST	0	0	0	0	1	1	no	AT1G07680	transmembrane protein
AT1G07690	AT1G07690	-	1:2378075-2379000	Col0Mockb_dir	dek2_1Mocka_dir	NOTEST	0.0443742	0.0387848	-0.19423	0	1	1	no	AT1G07690	transmembrane protein
AT1G07700	AT1G07700	-	1:2379646-2381362	Col0Mockb_dir	dek2_1Mocka_dir	OK	38.931	36.8695	-0.0784887	-0.303009	0.64015	0.875601	no	AT1G07700	Thioredoxin superfamily protein
AT1G07705	AT1G07705	-	1:2381614-2386092	Col0Mockb_dir	dek2_1Mocka_dir	OK	2.13106	2.11681	-0.0096842	-0.0253376	0.9696	0.99077	no	AT1G07705	NOT2 / NOT3 / NOT5 family
AT1G07710	AT1G07710	-	1:2386274-2387986	Col0Mockb_dir	dek2_1Mocka_dir	OK	0.401318	0.611841	0.608411	0.633044	0.3195	0.680542	no	AT1G07710	Ankyrin repeat family protein
AT1G07720	AT1G07720	-	1:2390654-2392453	Col0Mockb_dir	dek2_1Mocka_dir	OK	12.0222	14.3076	0.251087	0.893124	0.169	0.527285	no	KCS3	3-ketoacyl-CoA synthase 3
AT1G07725	AT1G07725	-	1:2394800-2397272	Col0Mockb_dir	dek2_1Mocka_dir	OK	5.75751	4.19127	-0.458059	-1.43932	0.03345	0.256793	no	EXO70H6	exocyst subunit exo70 family protein H6
AT1G07730	AT1G07730	-	1:2397441-2400508	Col0Mockb_dir	dek2_1Mocka_dir	OK	4.96643	4.22351	-0.233767	-0.414767	0.587	0.848291	no	AT1G07730	Disease resistance-responsive (dirigent-like protein) family protein
AT1G07740	AT1G07740	-	1:2397441-2400508	Col0Mockb_dir	dek2_1Mocka_dir	OK	1.62589	1.55646	-0.0629614	-0.096774	0.8734	0.96009	no	AT1G07740	Tetratricopeptide repeat (TPR)-like superfamily protein
AT1G07745	AT1G07745	-	1:2400588-2402873	Col0Mockb_dir	dek2_1Mocka_dir	OK	3.26025	2.73995	-0.250831	-0.572647	0.37425	0.723216	no	RAD51D	DNA repair RAD51-like protein
AT1G07747	AT1G07747	-	1:2403557-2403845	Col0Mockb_dir	dek2_1Mocka_dir	NOTEST	0	0	0	0	1	1	no	AT1G07747	Bifunctional inhibitor/lipid-transfer protein/seed storage 2S albumin superfamily protein
AT1G07750	AT1G07750	-	1:2404036-2405943	Col0Mockb_dir	dek2_1Mocka_dir	OK	20.5044	20.925	0.0292928	0.109846	0.868	0.958903	no	AT1G07750	RmlC-like cupins superfamily protein
AT1G07770	AT1G07770	-	1:2408202-2409580	Col0Mockb_dir	dek2_1Mocka_dir	OK	283.424	248.082	-0.192143	-0.729245	0.2566	0.625484	no	RPS15A	ribosomal protein S15A
AT1G07780	AT1G07780	-	1:2410055-2412677	Col0Mockb_dir	dek2_1Mocka_dir	OK	7.7794	8.74916	0.169486	0.557501	0.39875	0.742494	no	PAI1	phosphoribosylanthranilate isomerase 1
AT1G07790	AT1G07790	-	1:2412979-2413708	Col0Mockb_dir	dek2_1Mocka_dir	OK	84.6117	73.2005	-0.209004	-0.858223	0.21965	0.588178	no	HTB1	Histone superfamily protein
AT1G07795	AT1G07795	-	1:2414285-2414967	Col0Mockb_dir	dek2_1Mocka_dir	OK	1.13743	1.52639	0.424345	0.391618	0.5514	0.829868	no	AT1G07795	forkhead box protein G1
AT1G07810	AT1G07810	-	1:2416264-2420757	Col0Mockb_dir	dek2_1Mocka_dir	OK	8.57544	8.29109	-0.0486484	-0.183771	0.77705	0.929412	no	ECA1	ER-type Ca2 -ATPase 1
AT1G07820	AT1G07820	-	1:2421215-2421947	Col0Mockb_dir	dek2_1Mocka_dir	OK	213.171	171.949	-0.310034	-1.22281	0.06395	0.345791	no	AT1G07820	Histone superfamily protein
AT1G07830	AT1G07830	-	1:2422240-2423655	Col0Mockb_dir	dek2_1Mocka_dir	OK	26.596	23.7899	-0.160861	-0.579926	0.36775	0.716909	no	AT1G07830	ribosomal protein L29 family protein
AT1G07840	AT1G07840	-	1:2424053-2426676	Col0Mockb_dir	dek2_1Mocka_dir	OK	2.32936	2.47978	0.0902729	0.205274	0.7505	0.920966	no	AT1G07840	Sas10/Utp3/C1D family
AT1G07850	AT1G07850	-	1:2426744-2428719	Col0Mockb_dir	dek2_1Mocka_dir	NOTEST	0	0.0151365	inf	0	1	1	no	AT1G07850	transferring glycosyl group transferase (DUF604)
AT1G07860	AT1G07860	-	1:2428772-2432057	Col0Mockb_dir	dek2_1Mocka_dir	NOTEST	0	0	0	0	1	1	no	AT1G07860	Serine/Threonine-kinase RLCKVII protein
AT1G07870	AT1G07870	-	1:2428772-2432057	Col0Mockb_dir	dek2_1Mocka_dir	OK	3.53276	3.52705	-0.00233371	-0.00673729	0.9906	0.996951	no	AT1G07870	Protein kinase superfamily protein
AT1G07880	AT1G07880	-	1:2434029-2435763	Col0Mockb_dir	dek2_1Mocka_dir	OK	9.61517	9.28738	-0.050041	-0.152197	0.81255	0.940328	no	ATMPK13	Protein kinase superfamily protein
AT1G07885	AT1G07885	-	1:2436466-2436959	Col0Mockb_dir	dek2_1Mocka_dir	OK	0.435813	0.817054	0.906722	0.589478	0.4903	0.798995	no	AT1G07885	hypothetical protein
AT1G07890	AT1G07890	-	1:2437329-2439665	Col0Mockb_dir	dek2_1Mocka_dir	OK	259.881	306.703	0.238995	0.836452	0.2035	0.571434	no	APX1	ascorbate peroxidase 1
AT1G07900	AT1G07900	-	1:2442621-2443632	Col0Mockb_dir	dek2_1Mocka_dir	OK	0.398317	0.778875	0.967474	0.771531	0.272	0.641	no	LBD1	LOB domain-containing protein 1
AT1G07901	AT1G07901	-	1:2443970-2444123	Col0Mockb_dir	dek2_1Mocka_dir	OK	0	6.45953	inf	#NAME?	0.0029	0.0658511	no	AT1G07901	hypothetical protein
AT1G07910	AT1G07910	-	1:2445469-2454645	Col0Mockb_dir	dek2_1Mocka_dir	OK	1.49252	1.82142	0.287307	0.867062	0.1768	0.538933	no	RNL	RNAligase
AT1G07920	AT1G07920	-	1:2454845-2457321	Col0Mockb_dir	dek2_1Mocka_dir	OK	550.571	459.634	-0.260444	-0.873748	0.18075	0.543177	no	AT1G07920	GTP binding Elongation factor Tu family protein
AT1G07930	AT1G07930	-	1:2458243-2460790	Col0Mockb_dir	dek2_1Mocka_dir	OK	368.612	312.277	-0.239279	-0.839033	0.1964	0.56259	no	AT1G07930	GTP binding Elongation factor Tu family protein
AT1G07940	AT1G07940	-	1:2462952-2465504	Col0Mockb_dir	dek2_1Mocka_dir	OK	387.506	300.713	-0.365829	-1.27182	0.0492	0.309725	no	AT1G07940	GTP binding Elongation factor Tu family protein
AT1G07950	AT1G07950	-	1:2465769-2467022	Col0Mockb_dir	dek2_1Mocka_dir	OK	10.8584	11.9944	0.143549	0.42589	0.5057	0.807346	no	MED22B	Surfeit locus protein 5 subunit 22 of Mediator complex
AT1G07960	AT1G07960	-	1:2467160-2469154	Col0Mockb_dir	dek2_1Mocka_dir	OK	19.8208	20.0931	0.0196841	0.071207	0.9135	0.972941	no	PDIL5-1	PDI-like 5-1
AT1G07970	AT1G07970	-	1:2469285-2472628	Col0Mockb_dir	dek2_1Mocka_dir	OK	5.29649	4.10148	-0.368891	-1.17622	0.0713	0.36263	no	AT1G07970	cytochrome B561, amino-terminal protein
AT1G07980	AT1G07980	-	1:2473164-2474927	Col0Mockb_dir	dek2_1Mocka_dir	OK	7.13267	6.81464	-0.0658043	-0.193004	0.7618	0.924238	no	NF-YC10	nuclear factor Y, subunit C10
AT1G07985	AT1G07985	-	1:2475404-2476155	Col0Mockb_dir	dek2_1Mocka_dir	OK	2.94512	4.90669	0.736427	1.26937	0.05415	0.320353	no	AT1G07985	Expressed protein
AT1G07990	AT1G07990	-	1:2477156-2483138	Col0Mockb_dir	dek2_1Mocka_dir	OK	12.0666	9.75658	-0.306575	-1.18075	0.068	0.354436	no	AT1G07990	SIT4 phosphatase-associated family protein
AT1G08000	AT1G08000	-	1:2483239-2485109	Col0Mockb_dir	dek2_1Mocka_dir	OK	8.88712	5.50373	-0.691305	-2.11995	0.0018	0.0472814	yes	GATA10	GATA transcription factor 10
AT1G08005	AT1G08005	-	1:2485343-2485511	Col0Mockb_dir	dek2_1Mocka_dir	OK	0	2.03381	inf	#NAME?	0.03425	0.259439	no	AT1G08005	serine/threonine-protein phosphatase 6 regulatory subunit
AT1G08010	AT1G08010	-	1:2485905-2488027	Col0Mockb_dir	dek2_1Mocka_dir	OK	12.0512	9.02925	-0.4165	-1.4588	0.0281	0.232847	no	GATA11	GATA transcription factor 11
AT1G08030	AT1G08030	-	1:2489500-2493250	Col0Mockb_dir	dek2_1Mocka_dir	OK	2.60131	2.74907	0.0797061	0.209813	0.74565	0.919017	no	TPST	tyrosylprotein sulfotransferase
AT1G08032	AT1G08032	-	1:2494122-2494315	Col0Mockb_dir	dek2_1Mocka_dir	NOTEST	0	0	0	0	1	1	no
AT1G08035	AT1G08035	-	1:2494401-2495149	Col0Mockb_dir	dek2_1Mocka_dir	OK	0.817166	1.44469	0.822058	0.78169	0.34785	0.701577	no	AT1G08035	hypothetical protein
AT1G08040	AT1G08040	-	1:2495341-2498764	Col0Mockb_dir	dek2_1Mocka_dir	OK	5.10461	4.45697	-0.195739	-0.59489	0.36475	0.714442	no	AT1G08040	trimethylguanosine synthase (DUF707)
AT1G08050	AT1G08050	-	1:2498835-2501427	Col0Mockb_dir	dek2_1Mocka_dir	OK	1.36973	2.1575	0.655463	1.39847	0.03795	0.274731	no	AT1G08050	Zinc finger (C3HC4-type RING finger) family protein
AT1G08060	AT1G08060	-	1:2501741-2511084	Col0Mockb_dir	dek2_1Mocka_dir	OK	2.02074	1.61806	-0.320614	-1.03754	0.10265	0.429191	no	MOM	ATP-dependent helicase family protein
AT1G08065	AT1G08065	-	1:2511646-2513454	Col0Mockb_dir	dek2_1Mocka_dir	NOTEST	0	0	0	0	1	1	no	ACA5	alpha carbonic anhydrase 5
AT1G08070	AT1G08070	-	1:2514191-2516605	Col0Mockb_dir	dek2_1Mocka_dir	OK	0.431533	0.490649	0.185221	0.198386	0.75055	0.920966	no	OTP82	Tetratricopeptide repeat (TPR)-like superfamily protein
AT1G08080	AT1G08080	-	1:2516990-2518546	Col0Mockb_dir	dek2_1Mocka_dir	NOTEST	0.0193255	0.0251733	0.381388	0	1	1	no	ACA7	alpha carbonic anhydrase 7
AT1G08090	AT1G08090	-	1:2524075-2526164	Col0Mockb_dir	dek2_1Mocka_dir	OK	2.49662	6.03423	1.27319	3.28507	5e-05	0.00323653	yes	NRT2:1	nitrate transporter 2:1
AT1G08100	AT1G08100	-	1:2527169-2529120	Col0Mockb_dir	dek2_1Mocka_dir	NOTEST	0	0.0154331	inf	0	1	1	no	NRT2.2	nitrate transporter 2.2
AT1G08110	AT1G08110	-	1:2535327-2537931	Col0Mockb_dir	dek2_1Mocka_dir	OK	35.5841	31.841	-0.160346	-0.622401	0.34405	0.698536	no	AT1G08110	lactoylglutathione lyase family protein / glyoxalase I family protein
AT1G08120	AT1G08120	-	1:2538614-2542334	Col0Mockb_dir	dek2_1Mocka_dir	NOTEST	0.121154	0.0544051	-1.15503	0	1	1	no	AT1G08120	TP53-regulating kinase-like protein
AT1G08125	AT1G08125	-	1:2538614-2542334	Col0Mockb_dir	dek2_1Mocka_dir	OK	4.09413	4.41393	0.108505	0.300597	0.64285	0.876222	no	AT1G08125	S-adenosyl-L-methionine-dependent methyltransferases superfamily protein
AT1G08130	AT1G08130	-	1:2542701-2547946	Col0Mockb_dir	dek2_1Mocka_dir	OK	1.87989	2.03182	0.112125	0.297513	0.64905	0.877741	no	LIG1	DNA ligase 1
AT1G08135	AT1G08135	-	1:2548818-2551473	Col0Mockb_dir	dek2_1Mocka_dir	NOTEST	0	0	0	0	1	1	no	CHX6B	cation/H exchanger 6B
AT1G08140	AT1G08140	-	1:2552035-2555161	Col0Mockb_dir	dek2_1Mocka_dir	NOTEST	0	0	0	0	1	1	no	CHX6A	cation/H exchanger 6A
AT1G08150	AT1G08150	-	1:2556342-2559074	Col0Mockb_dir	dek2_1Mocka_dir	NOTEST	0	0.00334001	inf	0	1	1	no	ATCHX5	Cation/hydrogen exchanger family protein
AT1G08160	AT1G08160	-	1:2559486-2560403	Col0Mockb_dir	dek2_1Mocka_dir	OK	24.2279	23.2873	-0.0571247	-0.210293	0.76345	0.924518	no	AT1G08160	Late embryogenesis abundant (LEA) hydroxyproline-rich glycoprotein family
AT1G08165	AT1G08165	-	1:2561626-2562148	Col0Mockb_dir	dek2_1Mocka_dir	OK	5.27462	5.60772	0.0883481	0.124391	0.8476	0.952571	no	AT1G08165	hypothetical protein
AT1G08170	AT1G08170	-	1:2562940-2563672	Col0Mockb_dir	dek2_1Mocka_dir	NOTEST	0.0633099	0	#NAME?	0	1	1	no	AT1G08170	Histone superfamily protein
AT1G08180	AT1G08180	-	1:2564571-2565121	Col0Mockb_dir	dek2_1Mocka_dir	OK	23.8562	16.1136	-0.566087	-1.66639	0.022	0.205632	no	AT1G08180	cyclin-dependent kinase inhibitor
AT1G08190	AT1G08190	-	1:2567474-2573393	Col0Mockb_dir	dek2_1Mocka_dir	OK	14.8448	12.7825	-0.215793	-0.838547	0.19405	0.560349	no	VPS41	vacuolar protein sorting 41
AT1G08200	AT1G08200	-	1:2573847-2576714	Col0Mockb_dir	dek2_1Mocka_dir	OK	66.8328	59.9942	-0.155733	-0.599918	0.34365	0.698536	no	AXS2	UDP-D-apiose/UDP-D-xylose synthase 2
AT1G08210	AT1G08210	-	1:2577019-2580669	Col0Mockb_dir	dek2_1Mocka_dir	OK	2.0835	1.64172	-0.343798	-0.783395	0.2345	0.602245	no	AT1G08210	Eukaryotic aspartyl protease family protein
AT1G08220	AT1G08220	-	1:2581021-2583323	Col0Mockb_dir	dek2_1Mocka_dir	OK	2.50761	2.30266	-0.123012	-0.254242	0.698	0.898033	no	AT1G08220	ATPase complex subunit
AT1G08230	AT1G08230	-	1:2583653-2586744	Col0Mockb_dir	dek2_1Mocka_dir	OK	4.3521	5.47134	0.330181	0.985022	0.13525	0.484108	no	AT1G08230	Transmembrane amino acid transporter family protein
AT1G08250	AT1G08250	-	1:2588856-2590301	Col0Mockb_dir	dek2_1Mocka_dir	OK	11.1736	6.98741	-0.677262	-2.30544	0.00215	0.053715	no	ADT6	arogenate dehydratase 6
AT1G08260	AT1G08260	-	1:2590943-2607507	Col0Mockb_dir	dek2_1Mocka_dir	NOTEST	0.139581	0.175822	0.333006	0	1	1	no	TIL1	DNA polymerase epsilon catalytic subunit
AT1G08270	AT1G08270	-	1:2590943-2607507	Col0Mockb_dir	dek2_1Mocka_dir	OK	26.1506	18.9789	-0.462445	-1.55624	0.015	0.174072	no	AT1G08270	vacuolar protein sorting-associated protein
AT1G08280	AT1G08280	-	1:2608407-2609853	Col0Mockb_dir	dek2_1Mocka_dir	OK	9.22211	7.01757	-0.394125	-1.14769	0.0818	0.387651	no	AT1G08280	Glycosyltransferase family 29 (sialyltransferase) family protein
AT1G08290	AT1G08290	-	1:2609995-2613242	Col0Mockb_dir	dek2_1Mocka_dir	OK	0.837908	0.840188	0.00392025	0.00612409	0.99425	0.997803	no	WIP3	WIP domain protein 3
AT1G08300	AT1G08300	-	1:2614773-2621545	Col0Mockb_dir	dek2_1Mocka_dir	OK	1.20236	1.43375	0.253918	0.423113	0.51565	0.814227	no	NVL	no vein-like protein
AT1G08310	AT1G08310	-	1:2614773-2621545	Col0Mockb_dir	dek2_1Mocka_dir	OK	2.44268	3.13638	0.360635	0.531624	0.43	0.764225	no	AT1G08310	alpha/beta-Hydrolases superfamily protein
AT1G08315	AT1G08315	-	1:2614773-2621545	Col0Mockb_dir	dek2_1Mocka_dir	OK	5.239	4.69352	-0.158622	-0.33438	0.6432	0.87628	no	AT1G08315	ARM repeat superfamily protein
AT1G08320	AT1G08320	-	1:2621903-2627848	Col0Mockb_dir	dek2_1Mocka_dir	OK	2.35472	2.44173	0.0523452	0.151576	0.81475	0.940802	no	TGA9	bZIP transcription factor family protein
AT1G08340	AT1G08340	-	1:2631067-2635852	Col0Mockb_dir	dek2_1Mocka_dir	OK	4.16097	3.98276	-0.06315	-0.131539	0.84695	0.952323	no	AT1G08340	Rho GTPase activating protein with PAK-box/P21-Rho-binding domain-containing protein
AT1G08350	AT1G08350	-	1:2631067-2635852	Col0Mockb_dir	dek2_1Mocka_dir	OK	3.35149	3.31862	-0.0142178	-0.027506	0.9668	0.99004	no	AT1G08350	Endomembrane protein 70 protein family
AT1G08360	AT1G08360	-	1:2636010-2637915	Col0Mockb_dir	dek2_1Mocka_dir	OK	372.011	341.906	-0.121745	-0.44408	0.4885	0.797774	no	AT1G08360	Ribosomal protein L1p/L10e family
AT1G08370	AT1G08370	-	1:2638180-2640554	Col0Mockb_dir	dek2_1Mocka_dir	OK	18.7574	15.9944	-0.229895	-0.888075	0.18965	0.554244	no	DCP1	decapping 1
AT1G08380	AT1G08380	-	1:2640812-2641828	Col0Mockb_dir	dek2_1Mocka_dir	OK	3986.39	3678.14	-0.116108	-0.348487	0.5912	0.850775	no	PSAO	photosystem I subunit O
AT1G08390	AT1G08390	-	1:2642213-2643285	Col0Mockb_dir	dek2_1Mocka_dir	OK	8.44708	5.85695	-0.528302	-1.2502	0.0629	0.343008	no	AT1G08390	recQ-mediated instability-like protein
AT1G08400	AT1G08400	-	1:2643329-2646035	Col0Mockb_dir	dek2_1Mocka_dir	OK	3.65987	2.86943	-0.351027	-0.90686	0.15755	0.51216	no	AT1G08400	RINT-1 / TIP-1 family
AT1G08410	AT1G08410	-	1:2646188-2649379	Col0Mockb_dir	dek2_1Mocka_dir	OK	8.09109	7.09416	-0.189703	-0.661518	0.3076	0.671774	no	AT1G08410	P-loop containing nucleoside triphosphate hydrolases superfamily protein
AT1G08420	AT1G08420	-	1:2649536-2657120	Col0Mockb_dir	dek2_1Mocka_dir	OK	6.45859	5.06175	-0.351583	-1.323	0.0427	0.291644	no	BSL2	BRI1 suppressor 1 (BSU1)-like 2
AT1G08430	AT1G08430	-	1:2658715-2661029	Col0Mockb_dir	dek2_1Mocka_dir	OK	1.73627	1.40741	-0.302951	-0.523478	0.40305	0.745764	no	ALMT1	aluminum-activated malate transporter 1
AT1G08440	AT1G08440	-	1:2663026-2665343	Col0Mockb_dir	dek2_1Mocka_dir	NOTEST	0.0364322	0.101602	1.47965	0	1	1	no	AT1G08440	aluminum activated malate transporter family protein
AT1G08450	AT1G08450	-	1:2667797-2671892	Col0Mockb_dir	dek2_1Mocka_dir	OK	1.63503	1.86091	0.186693	0.429992	0.4888	0.797904	no	CRT3	calreticulin 3
AT1G08460	AT1G08460	-	1:2672450-2674628	Col0Mockb_dir	dek2_1Mocka_dir	OK	11.1916	8.36699	-0.419633	-1.46595	0.0278	0.23113	no	HDA08	histone deacetylase 8
AT1G08465	AT1G08465	-	1:2675812-2679781	Col0Mockb_dir	dek2_1Mocka_dir	OK	1.74733	1.79596	0.0396099	0.0883301	0.8951	0.967035	no	YAB2	Plant-specific transcription factor YABBY family protein
AT1G08470	AT1G08470	-	1:2682126-2684100	Col0Mockb_dir	dek2_1Mocka_dir	OK	15.1927	14.7226	-0.0453418	-0.162582	0.80085	0.935854	no	SSL3	strictosidine synthase-like 3
AT1G08480	AT1G08480	-	1:2684233-2685621	Col0Mockb_dir	dek2_1Mocka_dir	OK	102.348	86.5434	-0.241994	-0.941538	0.1449	0.495858	no	SDH6	succinate dehydrogenase subunit
AT1G08490	AT1G08490	-	1:2685658-2688595	Col0Mockb_dir	dek2_1Mocka_dir	OK	18.5888	15.4101	-0.270555	-1.02756	0.11615	0.452459	no	CPNIFS	chloroplastic NIFS-like cysteine desulfurase
AT1G08500	AT1G08500	-	1:2689015-2690045	Col0Mockb_dir	dek2_1Mocka_dir	OK	8.68224	11.1834	0.365225	0.918802	0.1599	0.515846	no	ENODL18	early nodulin-like protein 18
AT1G08510	AT1G08510	-	1:2691079-2694377	Col0Mockb_dir	dek2_1Mocka_dir	OK	25.1767	26.1949	0.0572005	0.221582	0.7306	0.911741	no	FATB	fatty acyl-ACP thioesterases B
AT1G08520	AT1G08520	-	1:2696411-2700959	Col0Mockb_dir	dek2_1Mocka_dir	OK	16.8131	17.7199	0.07579	0.289932	0.64615	0.876645	no	ALB1	ALBINA 1
AT1G08530	AT1G08530	-	1:2701225-2703091	Col0Mockb_dir	dek2_1Mocka_dir	OK	7.22344	6.81206	-0.0845954	-0.236503	0.70755	0.902246	no	AT1G08530	chitinase-like protein
AT1G08540	AT1G08540	-	1:2703335-2706845	Col0Mockb_dir	dek2_1Mocka_dir	OK	33.4772	32.0378	-0.0634046	-0.24469	0.70625	0.901787	no	SIG2	RNApolymerase sigma subunit 2
AT1G08550	AT1G08550	-	1:2706923-2709531	Col0Mockb_dir	dek2_1Mocka_dir	OK	43.793	31.7742	-0.462848	-1.7869	0.0061	0.104841	no	NPQ1	non-photochemical quenching 1
AT1G08560	AT1G08560	-	1:2709631-2710912	Col0Mockb_dir	dek2_1Mocka_dir	OK	26.8224	32.6688	0.284479	1.08617	0.1013	0.42653	no	SYP111	syntaxin of plants 111
AT1G08570	AT1G08570	-	1:2712882-2714734	Col0Mockb_dir	dek2_1Mocka_dir	OK	71.6248	56.1842	-0.350296	-1.3686	0.03655	0.268595	no	ACHT4	atypical CYS HIS rich thioredoxin 4
AT1G08580	AT1G08580	-	1:2715078-2716404	Col0Mockb_dir	dek2_1Mocka_dir	OK	21.34	24.6791	0.209727	0.731694	0.2547	0.62349	no	AT1G08580	hypothetical protein
AT1G08590	AT1G08590	-	1:2718777-2722221	Col0Mockb_dir	dek2_1Mocka_dir	OK	4.83054	4.24286	-0.187147	-0.602536	0.35035	0.703417	no	AT1G08590	Leucine-rich receptor-like protein kinase family protein
AT1G08600	AT1G08600	-	1:2723823-2733613	Col0Mockb_dir	dek2_1Mocka_dir	OK	2.61898	2.64735	0.0155421	0.0536792	0.93445	0.980073	no	ATRX	P-loop containing nucleoside triphosphate hydrolases superfamily protein
AT1G08610	AT1G08610	-	1:2733656-2735819	Col0Mockb_dir	dek2_1Mocka_dir	OK	4.57725	4.56098	-0.00513679	-0.0139517	0.98215	0.994168	no	AT1G08610	Pentatricopeptide repeat (PPR) superfamily protein
AT1G08620	AT1G08620	-	1:2736773-2743758	Col0Mockb_dir	dek2_1Mocka_dir	OK	3.8612	3.92542	0.0237986	0.0833945	0.89765	0.968108	no	PKDM7D	Transcription factor jumonji (jmj) family protein / zinc finger (C5HC2 type) family protein
AT1G08630	AT1G08630	-	1:2743760-2747967	Col0Mockb_dir	dek2_1Mocka_dir	NOTEST	0.145607	0.0723829	-1.00835	0	1	1	no	THA1	threonine aldolase 1
AT1G08640	AT1G08640	-	1:2748397-2751278	Col0Mockb_dir	dek2_1Mocka_dir	OK	33.3362	26.0357	-0.356599	-1.3884	0.0343	0.259521	no	CJD1	Chloroplast J-like domain 1
AT1G08650	AT1G08650	-	1:2752153-2753703	Col0Mockb_dir	dek2_1Mocka_dir	OK	28.7537	20.05	-0.520148	-2.00347	0.00405	0.0818913	no	PPCK1	phosphoenolpyruvate carboxylase kinase 1
AT1G08660	AT1G08660	-	1:2757040-2759794	Col0Mockb_dir	dek2_1Mocka_dir	OK	21.3512	15.2562	-0.484924	-1.8333	0.00595	0.103332	no	MGP2	MALE GAMETOPHYTE DEFECTIVE 2
AT1G08670	AT1G08670	-	1:2760345-2761573	Col0Mockb_dir	dek2_1Mocka_dir	OK	3.48117	3.07887	-0.177174	-0.316234	0.62305	0.866714	no	AT1G08670	ENTH/VHS family protein
AT1G08680	AT1G08680	-	1:2762583-2768967	Col0Mockb_dir	dek2_1Mocka_dir	OK	2.22877	2.47717	0.152443	0.462834	0.4893	0.7981	no	ZIGA4	ARF GAP-like zinc finger-containing protein ZIGA4
AT1G08695	AT1G08695	-	1:2769055-2769483	Col0Mockb_dir	dek2_1Mocka_dir	NOTEST	0	0	0	0	1	1	no	SCRL3	SCR-like 3
AT1G08700	AT1G08700	-	1:2769814-2771477	Col0Mockb_dir	dek2_1Mocka_dir	OK	21.0661	17.5491	-0.263526	-0.975636	0.14055	0.491691	no	PS1	Presenilin-1
AT1G08710	AT1G08710	-	1:2771632-2773460	Col0Mockb_dir	dek2_1Mocka_dir	OK	4.1228	4.28821	0.0567518	0.138901	0.8248	0.945223	no	AT1G08710	F-box family protein
AT1G08720	AT1G08720	-	1:2774029-2779297	Col0Mockb_dir	dek2_1Mocka_dir	OK	1.92798	1.62008	-0.251027	-0.670692	0.30235	0.667621	no	EDR1	Protein kinase superfamily protein
AT1G08730	AT1G08730	-	1:2779962-2788447	Col0Mockb_dir	dek2_1Mocka_dir	NOTEST	0.0397905	0.145977	1.87525	0	1	1	no	XIC	Myosin family protein with Dil domain-containing protein
AT1G08750	AT1G08750	-	1:2801066-2804537	Col0Mockb_dir	dek2_1Mocka_dir	OK	2.07973	2.5908	0.317001	0.755705	0.24385	0.612066	no	AT1G08750	Peptidase C13 family
AT1G08760	AT1G08760	-	1:2805370-2808621	Col0Mockb_dir	dek2_1Mocka_dir	OK	5.82012	5.97379	0.0375968	0.126395	0.84425	0.951649	no	AT1G08760	GPI-anchored adhesin-like protein, putative (DUF936)
AT1G08770	AT1G08770	-	1:2808882-2809747	Col0Mockb_dir	dek2_1Mocka_dir	OK	18.1894	16.0624	-0.179413	-0.576204	0.41065	0.751618	no	PRA1.E	prenylated RAB acceptor 1.E
AT1G08780	AT1G08780	-	1:2809777-2811191	Col0Mockb_dir	dek2_1Mocka_dir	OK	25.8765	23.6885	-0.127456	-0.452538	0.47845	0.792527	no	AIP3	ABI3-interacting protein 3
AT1G08790	AT1G08790	-	1:2811988-2812646	Col0Mockb_dir	dek2_1Mocka_dir	NOTEST	0	0	0	0	1	1	no	AT1G08790	1-phosphatidylinositol-4,5-bisphosphate phosphodiesterase epsilon-1, putative (DUF1685)
AT1G08800	AT1G08800	-	1:2813060-2818008	Col0Mockb_dir	dek2_1Mocka_dir	OK	1.80216	2.78918	0.630114	1.74527	0.00755	0.118804	no	AT1G08800	myosin-binding protein (Protein of unknown function, DUF593)
AT1G08810	AT1G08810	-	1:2819064-2820395	Col0Mockb_dir	dek2_1Mocka_dir	OK	15.5267	12.7557	-0.283613	-0.927759	0.1562	0.510176	no	MYB60	myb domain protein 60
AT1G08820	AT1G08820	-	1:2821551-2825275	Col0Mockb_dir	dek2_1Mocka_dir	OK	6.55084	7.02867	0.101571	0.350822	0.5849	0.847594	no	VAP27-2	vamp/synaptobrevin-associated protein 27-2
AT1G08830	AT1G08830	-	1:2827060-2838469	Col0Mockb_dir	dek2_1Mocka_dir	OK	5.64385	7.31145	0.373477	0.933964	0.16165	0.516968	no	CSD1	copper/zinc superoxide dismutase 1
AT1G08840	AT1G08840	-	1:2827060-2838469	Col0Mockb_dir	dek2_1Mocka_dir	OK	0.937817	0.964996	0.0412169	0.0818007	0.89995	0.968813	no	emb2411	DNA replication helicase
AT1G08845	AT1G08845	-	1:2838788-2840994	Col0Mockb_dir	dek2_1Mocka_dir	OK	2.84526	4.20386	0.563157	1.34441	0.0452	0.299717	no	AT1G08845	Ribosomal L18p/L5e family protein
AT1G08860	AT1G08860	-	1:2842152-2846138	Col0Mockb_dir	dek2_1Mocka_dir	NOTEST	0	0.00355831	inf	0	1	1	no	BON3	Calcium-dependent phospholipid-binding Copine family protein
AT1G08880	AT1G08880	-	1:2846948-2847800	Col0Mockb_dir	dek2_1Mocka_dir	OK	94.4546	78.8967	-0.259658	-1.02805	0.12105	0.460216	no	H2AXA	Histone superfamily protein
AT1G08890	AT1G08890	-	1:2848347-2852270	Col0Mockb_dir	dek2_1Mocka_dir	OK	1.47533	1.71636	0.218317	0.452892	0.5045	0.806658	no	AT1G08890	Major facilitator superfamily protein
AT1G08900	AT1G08900	-	1:2852453-2855779	Col0Mockb_dir	dek2_1Mocka_dir	OK	1.71248	1.81503	0.0839061	0.173968	0.79425	0.934547	no	AT1G08900	Major facilitator superfamily protein
AT1G08910	AT1G08910	-	1:2856226-2861170	Col0Mockb_dir	dek2_1Mocka_dir	OK	11.9219	8.7378	-0.44827	-1.71356	0.00805	0.122514	no	AT1G08910	zinc ion binding protein
AT1G08920	AT1G08920	-	1:2867258-2870656	Col0Mockb_dir	dek2_1Mocka_dir	OK	1.71459	3.24488	0.920296	2.05583	0.002	0.0507949	no	ESL1	ERD (early response to dehydration) six-like 1
AT1G08930	AT1G08930	-	1:2873464-2877270	Col0Mockb_dir	dek2_1Mocka_dir	OK	3.9246	15.2618	1.9593	6.31993	5e-05	0.00323653	yes	ERD6	Major facilitator superfamily protein
AT1G08940	AT1G08940	-	1:2877691-2879169	Col0Mockb_dir	dek2_1Mocka_dir	OK	6.0376	5.85069	-0.0453679	-0.128119	0.85105	0.954003	no	AT1G08940	Phosphoglycerate mutase family protein
AT1G08960	AT1G08960	-	1:2879641-2882231	Col0Mockb_dir	dek2_1Mocka_dir	OK	3.73118	3.60977	-0.0477224	-0.125545	0.8492	0.953348	no	CAX11	cation exchanger 11
AT1G08970	AT1G08970	-	1:2882523-2884337	Col0Mockb_dir	dek2_1Mocka_dir	OK	20.7932	20.6255	-0.0116876	-0.0439091	0.9455	0.984049	no	NF-YC9	nuclear factor Y, subunit C9
AT1G08980	AT1G08980	-	1:2884410-2886620	Col0Mockb_dir	dek2_1Mocka_dir	OK	4.46736	3.55521	-0.329491	-0.846319	0.19125	0.556392	no	AMI1	amidase 1
AT1G08985	AT1G08985	-	1:2887284-2887706	Col0Mockb_dir	dek2_1Mocka_dir	OK	1.07087	0	#NAME?	#NAME?	0.0021	0.0527966	no	AT1G08985	AP2/B3-like transcriptional factor family protein
AT1G08990	AT1G08990	-	1:2888752-2890959	Col0Mockb_dir	dek2_1Mocka_dir	OK	3.85614	4.11697	0.0944271	0.25297	0.6948	0.896816	no	PGSIP5	plant glycogenin-like starch initiation protein 5
AT1G09000	AT1G09000	-	1:2891036-2899384	Col0Mockb_dir	dek2_1Mocka_dir	OK	1.92253	1.42478	-0.432267	-0.406058	0.52415	0.817347	no	NP1	NPK1-related protein kinase 1
AT1G09010	AT1G09010	-	1:2891036-2899384	Col0Mockb_dir	dek2_1Mocka_dir	OK	25.6128	19.8455	-0.368057	-1.38569	0.0296	0.238921	no	AT1G09010	glycoside hydrolase family 2 protein
AT1G09020	AT1G09020	-	1:2899913-2904815	Col0Mockb_dir	dek2_1Mocka_dir	OK	5.42686	4.28043	-0.342362	-1.16624	0.07455	0.370372	no	SNF4	sucrose nonfermenting-like protein
AT1G09026	AT1G09026	-	1:2907123-2907279	Col0Mockb_dir	dek2_1Mocka_dir	NOTEST	0	0	0	0	1	1	no
AT1G09030	AT1G09030	-	1:2908610-2909030	Col0Mockb_dir	dek2_1Mocka_dir	NOTEST	0	0.0212505	inf	0	1	1	no	NF-YB4	nuclear factor Y, subunit B4
AT1G09040	AT1G09040	-	1:2911316-2915369	Col0Mockb_dir	dek2_1Mocka_dir	OK	1.56491	1.21214	-0.368525	-0.831707	0.20525	0.572878	no	AT1G09040	arginine-glutamic acid dipeptide repeat protein
AT1G09050	AT1G09050	-	1:2918030-2920889	Col0Mockb_dir	dek2_1Mocka_dir	OK	0.804367	0.863705	0.102684	0.170109	0.7994	0.935637	no	AT1G09050	arginine-glutamic acid dipeptide repeat protein
AT1G09060	AT1G09060	-	1:2921063-2925762	Col0Mockb_dir	dek2_1Mocka_dir	OK	3.58246	3.98602	0.154	0.503965	0.4302	0.764225	no	AT1G09060	JmjC domain protein JMJ24
AT1G09070	AT1G09070	-	1:2927702-2928968	Col0Mockb_dir	dek2_1Mocka_dir	OK	57.3036	83.7714	0.547832	2.39125	0.00095	0.0308471	yes	SRC2	soybean gene regulated by cold-2
AT1G09080	AT1G09080	-	1:2929216-2931841	Col0Mockb_dir	dek2_1Mocka_dir	NOTEST	0.194561	0.251938	0.372849	0	1	1	no	BIP3	Heat shock protein 70 (Hsp 70) family protein
AT1G09090	AT1G09090	-	1:2932738-2939326	Col0Mockb_dir	dek2_1Mocka_dir	OK	1.09371	1.11056	0.0220515	0.0361548	0.95595	0.987094	no	RBOHB	respiratory burst oxidase-like protein
AT1G09100	AT1G09100	-	1:2932738-2939326	Col0Mockb_dir	dek2_1Mocka_dir	OK	2.35772	2.63257	0.15908	0.346083	0.59445	0.8522	no	RPT5B	26S proteasome AAA-ATPase subunit RPT5B
AT1G09130	AT1G09130	-	1:2939569-2942288	Col0Mockb_dir	dek2_1Mocka_dir	OK	18.3111	14.8735	-0.29997	-1.1355	0.0863	0.397267	no	AT1G09130	ATP-dependent caseinolytic (Clp) protease/crotonase family protein
AT1G09140	AT1G09140	-	1:2942563-2945961	Col0Mockb_dir	dek2_1Mocka_dir	OK	20.4575	15.4966	-0.400684	-1.53474	0.01915	0.193902	no	SR30	SERINE-ARGININE PROTEIN 30
AT1G09150	AT1G09150	-	1:2946228-2949159	Col0Mockb_dir	dek2_1Mocka_dir	OK	5.56679	4.54463	-0.29268	-0.856745	0.18385	0.546506	no	AT1G09150	pseudouridine synthase and archaeosine transglycosylase (PUA) domain-containing protein
AT1G09155	AT1G09155	-	1:2949675-2950989	Col0Mockb_dir	dek2_1Mocka_dir	OK	1.40622	1.23748	-0.184416	-0.251939	0.703	0.900521	no	PP2-B15	phloem protein 2-B15
AT1G09157	AT1G09157	-	1:2951664-2952396	Col0Mockb_dir	dek2_1Mocka_dir	NOTEST	0	0.118267	inf	0	1	1	no	AT1G09157	transmembrane protein, putative (DUF679)
AT1G09160	AT1G09160	-	1:2952770-2955689	Col0Mockb_dir	dek2_1Mocka_dir	OK	11.2854	9.34259	-0.272561	-0.968743	0.1358	0.485031	no	AT1G09160	Protein phosphatase 2C family protein
AT1G09170	AT1G09170	-	1:2956588-2962207	Col0Mockb_dir	dek2_1Mocka_dir	OK	0.563018	0.659212	0.22756	0.404825	0.5355	0.822924	no	AT1G09170	P-loop nucleoside triphosphate hydrolases superfamily protein with CH (Calponin Homology) domain-containing protein
AT1G09176	AT1G09176	-	1:2964151-2964604	Col0Mockb_dir	dek2_1Mocka_dir	OK	1.69043	0.620892	-1.44497	-1.26047	0.1853	0.548201	no	AT1G09176	transmembrane protein
AT1G09180	AT1G09180	-	1:2965022-2965972	Col0Mockb_dir	dek2_1Mocka_dir	OK	2.52158	2.09601	-0.266682	-0.354317	0.578	0.843488	no	SARA1A	secretion-associated RAS super family 1
AT1G09190	AT1G09190	-	1:2966119-2967718	Col0Mockb_dir	dek2_1Mocka_dir	OK	0.991005	1.23244	0.314556	0.453533	0.482	0.793972	no	AT1G09190	Tetratricopeptide repeat (TPR)-like superfamily protein
AT1G09195	AT1G09195	-	1:2967939-2971498	Col0Mockb_dir	dek2_1Mocka_dir	OK	1.89814	1.46248	-0.376171	-0.811704	0.20615	0.574336	no	AT1G09195	Ppx-GppA phosphatase
AT1G09200	AT1G09200	-	1:2971592-2972199	Col0Mockb_dir	dek2_1Mocka_dir	OK	210.909	181.543	-0.216311	-0.932955	0.19435	0.560503	no	AT1G09200	Histone superfamily protein
AT1G09210	AT1G09210	-	1:2972841-2976750	Col0Mockb_dir	dek2_1Mocka_dir	OK	11.8343	11.6493	-0.0227287	-0.0841347	0.897	0.967934	no	CRT1b	calreticulin 1b
AT1G09220	AT1G09220	-	1:2977791-2979466	Col0Mockb_dir	dek2_1Mocka_dir	OK	0.774242	0.634205	-0.287835	-0.325841	0.6166	0.863405	no	AT1G09220	Pentatricopeptide repeat (PPR) superfamily protein
AT1G09230	AT1G09230	-	1:2979519-2982624	Col0Mockb_dir	dek2_1Mocka_dir	OK	3.47082	3.51506	0.0182745	0.0493442	0.93845	0.981013	no	AT1G09230	RNA-binding (RRM/RBD/RNP motifs) family protein
AT1G09240	AT1G09240	-	1:2984880-2986130	Col0Mockb_dir	dek2_1Mocka_dir	OK	6.41183	7.1403	0.155249	0.3891	0.54355	0.826413	no	NAS3	nicotianamine synthase 3
AT1G09245	AT1G09245	-	1:2986938-2987393	Col0Mockb_dir	dek2_1Mocka_dir	NOTEST	0	0	0	0	1	1	no	AT1G09245	Plant self-incompatibility protein S1 family
AT1G09250	AT1G09250	-	1:2989377-2990357	Col0Mockb_dir	dek2_1Mocka_dir	OK	16.0054	11.8122	-0.438286	-1.51364	0.03115	0.245955	no	AT1G09250	basic helix-loop-helix (bHLH) DNA-binding superfamily protein
AT1G09260	AT1G09260	-	1:2993403-2993820	Col0Mockb_dir	dek2_1Mocka_dir	NOTEST	0	0	0	0	1	1	no	AT1G09260	Chaperone DnaJ-domain superfamily protein
AT1G09270	AT1G09270	-	1:2994368-3001315	Col0Mockb_dir	dek2_1Mocka_dir	OK	14.0354	12.56	-0.160232	-0.492038	0.4505	0.774764	no	IMPA-4	importin alpha isoform 4
AT1G09280	AT1G09280	-	1:2994368-3001315	Col0Mockb_dir	dek2_1Mocka_dir	OK	10.198	8.2487	-0.306051	-0.71414	0.2684	0.63749	no	AT1G09280	rhodanese-like domain protein
AT1G09290	AT1G09290	-	1:3001516-3008213	Col0Mockb_dir	dek2_1Mocka_dir	OK	3.50739	3.98699	0.184905	0.379139	0.5628	0.836231	no	AT1G09290	hypothetical protein
AT1G09300	AT1G09300	-	1:3001516-3008213	Col0Mockb_dir	dek2_1Mocka_dir	OK	1.32741	1.53005	0.204972	0.355399	0.5699	0.839162	no	AT1G09300	Metallopeptidase M24 family protein
AT1G09310	AT1G09310	-	1:3009054-3009880	Col0Mockb_dir	dek2_1Mocka_dir	OK	917.235	781.194	-0.231611	-0.939873	0.2033	0.571394	no	AT1G09310	plant/protein (Protein of unknown function, DUF538)
AT1G09320	AT1G09320	-	1:3009940-3012363	Col0Mockb_dir	dek2_1Mocka_dir	OK	2.25925	1.92361	-0.232029	-0.529411	0.426	0.761924	no	AT1G09320	agenet domain-containing protein
AT1G09330	AT1G09330	-	1:3012761-3015091	Col0Mockb_dir	dek2_1Mocka_dir	OK	13.4165	14.4323	0.105288	0.371992	0.56835	0.83846	no	AT1G09330	golgi apparatus membrane protein-like protein ECHIDNA protein
AT1G09340	AT1G09340	-	1:3015327-3018234	Col0Mockb_dir	dek2_1Mocka_dir	OK	379.204	328.759	-0.205943	-0.705239	0.27675	0.645254	no	CRB	chloroplast RNA binding protein
AT1G09350	AT1G09350	-	1:3019818-3021441	Col0Mockb_dir	dek2_1Mocka_dir	OK	4.04614	3.95606	-0.0324851	-0.0794374	0.90775	0.971121	no	GolS3	galactinol synthase 3
AT1G09360	AT1G09360	-	1:3021801-3022368	Col0Mockb_dir	dek2_1Mocka_dir	NOTEST	0	0	0	0	1	1	no	AT1G09360	Plant invertase/pectin methylesterase inhibitor superfamily protein
AT1G09370	AT1G09370	-	1:3024895-3025435	Col0Mockb_dir	dek2_1Mocka_dir	OK	0.117121	0.529377	2.1763	0.92708	0.1801	0.542477	no	AT1G09370	Plant invertase/pectin methylesterase inhibitor superfamily protein
AT1G09380	AT1G09380	-	1:3026134-3029549	Col0Mockb_dir	dek2_1Mocka_dir	NOTEST	0.0507915	0.0791333	0.6397	0	1	1	no	UMAMIT25	nodulin MtN21 /EamA-like transporter family protein
AT1G09390	AT1G09390	-	1:3031202-3035036	Col0Mockb_dir	dek2_1Mocka_dir	OK	8.11448	6.62077	-0.293501	-0.907471	0.15875	0.513882	no	AT1G09390	GDSL-like Lipase/Acylhydrolase superfamily protein
AT1G09400	AT1G09400	-	1:3031202-3035036	Col0Mockb_dir	dek2_1Mocka_dir	NOTEST	0.391175	0.441456	0.174456	0	1	1	no	AT1G09400	FMN-linked oxidoreductases superfamily protein
AT1G09410	AT1G09410	-	1:3035442-3037560	Col0Mockb_dir	dek2_1Mocka_dir	NOTEST	0.487904	0.42267	-0.207064	0	1	1	no	AT1G09410	pentatricopeptide (PPR) repeat-containing protein
AT1G09415	AT1G09415	-	1:3037753-3038408	Col0Mockb_dir	dek2_1Mocka_dir	OK	26.2385	33.2673	0.342419	1.21677	0.08125	0.386514	no	NIMIN-3	NIM1-interacting 3
AT1G09420	AT1G09420	-	1:3038461-3041873	Col0Mockb_dir	dek2_1Mocka_dir	OK	7.0013	4.70111	-0.574622	-1.86046	0.00435	0.0853602	no	G6PD4	glucose-6-phosphate dehydrogenase 4
AT1G09430	AT1G09430	-	1:3041995-3045402	Col0Mockb_dir	dek2_1Mocka_dir	OK	7.11694	8.14609	0.194851	0.670392	0.2934	0.660254	no	ACLA-3	ATP-citrate lyase A-3
AT1G09440	AT1G09440	-	1:3045512-3047893	Col0Mockb_dir	dek2_1Mocka_dir	OK	1.26488	1.77544	0.489176	0.871562	0.17015	0.529547	no	AT1G09440	Protein kinase superfamily protein
AT1G09450	AT1G09450	-	1:3049023-3053112	Col0Mockb_dir	dek2_1Mocka_dir	OK	0.514461	0.725484	0.495881	0.752254	0.23985	0.607092	no	Haspin	Protein kinase superfamily protein
AT1G09460	AT1G09460	-	1:3053900-3057443	Col0Mockb_dir	dek2_1Mocka_dir	OK	7.23839	7.90591	0.127263	0.317935	0.62855	0.869384	no	AT1G09460	Carbohydrate-binding X8 domain superfamily protein
AT1G09470	AT1G09470	-	1:3053900-3057443	Col0Mockb_dir	dek2_1Mocka_dir	OK	3.12943	2.34561	-0.415938	-0.721867	0.26815	0.637276	no	AT1G09470	myosin heavy chain, cardiac protein
AT1G09480	AT1G09480	-	1:3057974-3060661	Col0Mockb_dir	dek2_1Mocka_dir	OK	0.360079	0.56166	0.641384	0.679267	0.29015	0.658254	no	AT1G09480	NAD(P)-binding Rossmann-fold superfamily protein
AT1G09483	AT1G09483	-	1:3060991-3061729	Col0Mockb_dir	dek2_1Mocka_dir	NOTEST	0.0454392	0.0637392	0.488242	0	1	1	no	AT1G09483	myosin heavy chain, cardiac protein
AT1G09490	AT1G09490	-	1:3064123-3065937	Col0Mockb_dir	dek2_1Mocka_dir	OK	15.1461	14.6163	-0.0513745	-0.17555	0.78275	0.930683	no	AT1G09490	NAD(P)-binding Rossmann-fold superfamily protein
AT1G09500	AT1G09500	-	1:3066698-3068598	Col0Mockb_dir	dek2_1Mocka_dir	OK	1.55551	3.30517	1.08734	1.96581	0.00635	0.106655	no	AT1G09500	NAD(P)-binding Rossmann-fold superfamily protein
AT1G09510	AT1G09510	-	1:3069384-3070910	Col0Mockb_dir	dek2_1Mocka_dir	NOTEST	0	0	0	0	1	1	no	AT1G09510	NAD(P)-binding Rossmann-fold superfamily protein
AT1G09520	AT1G09520	-	1:3070945-3072050	Col0Mockb_dir	dek2_1Mocka_dir	OK	12.5457	8.74345	-0.520914	-1.64019	0.0197	0.196674	no	AT1G09520	hypothetical protein
AT1G09530	AT1G09530	-	1:3076581-3079539	Col0Mockb_dir	dek2_1Mocka_dir	OK	3.60999	4.10046	0.183791	0.5268	0.41695	0.755017	no	PIF3	phytochrome interacting factor 3
AT1G09540	AT1G09540	-	1:3086158-3087912	Col0Mockb_dir	dek2_1Mocka_dir	OK	2.86321	1.52371	-0.910043	-1.64533	0.01455	0.171343	no	MYB61	myb domain protein 61
AT1G09550	AT1G09550	-	1:3089732-3092327	Col0Mockb_dir	dek2_1Mocka_dir	NOTEST	0	0	0	0	1	1	no	AT1G09550	Pectinacetylesterase family protein
AT1G09560	AT1G09560	-	1:3093838-3094864	Col0Mockb_dir	dek2_1Mocka_dir	OK	767.937	662.147	-0.213838	-0.788622	0.23705	0.605208	no	GLP5	germin-like protein 5
AT1G09570	AT1G09570	-	1:3095255-3100357	Col0Mockb_dir	dek2_1Mocka_dir	OK	8.30327	9.17852	0.144582	0.553723	0.3997	0.743429	no	PHYA	phytochrome A
AT1G09575	AT1G09575	-	1:3101670-3102925	Col0Mockb_dir	dek2_1Mocka_dir	OK	1.54151	3.06848	0.993178	1.57055	0.0233	0.211728	no	AT1G09575	calcium uniporter-like protein (DUF607)
AT1G09580	AT1G09580	-	1:3104587-3106290	Col0Mockb_dir	dek2_1Mocka_dir	OK	5.01734	4.7145	-0.0898171	-0.22149	0.72915	0.911224	no	AT1G09580	emp24/gp25L/p24 family/GOLD family protein
AT1G09590	AT1G09590	-	1:3106501-3107772	Col0Mockb_dir	dek2_1Mocka_dir	OK	328.181	335.964	0.033817	0.124121	0.84595	0.952257	no	AT1G09590	Translation protein SH3-like family protein
AT1G09600	AT1G09600	-	1:3108616-3111318	Col0Mockb_dir	dek2_1Mocka_dir	NOTEST	0.491486	0.44554	-0.141594	0	1	1	no	AT1G09600	Protein kinase superfamily protein
AT1G09610	AT1G09610	-	1:3111693-3116699	Col0Mockb_dir	dek2_1Mocka_dir	OK	0.926145	0.975981	0.0756142	0.0340667	0.54855	0.828933	no	GXM3	glucuronoxylan 4-O-methyltransferase-like protein (DUF579)
AT1G09620	AT1G09620	-	1:3111693-3116699	Col0Mockb_dir	dek2_1Mocka_dir	OK	20.266	21.5487	0.0885433	0.347081	0.59005	0.850121	no	AT1G09620	ATP binding/leucine-tRNA ligases/aminoacyl-tRNA ligase
AT1G09625	AT1G09625	-	1:3117136-3117567	Col0Mockb_dir	dek2_1Mocka_dir	NOTEST	0	0.111176	inf	0	1	1	no	AT1G09625	transmembrane protein
AT1G09630	AT1G09630	-	1:3118202-3119708	Col0Mockb_dir	dek2_1Mocka_dir	OK	22.8888	22.8971	0.000524861	0.00189955	0.998	0.998851	no	RAB11c	RAB GTPase 11C
AT1G09640	AT1G09640	-	1:3119877-3122526	Col0Mockb_dir	dek2_1Mocka_dir	OK	169.477	160.264	-0.0806329	-0.298671	0.6459	0.876645	no	AT1G09640	Translation elongation factor EF1B, gamma chain
AT1G09645	AT1G09645	-	1:3122955-3124578	Col0Mockb_dir	dek2_1Mocka_dir	OK	13.7016	14.8549	0.116595	0.379855	0.55055	0.82983	no	AT1G09645	transmembrane protein
AT1G09650	AT1G09650	-	1:3125806-3127284	Col0Mockb_dir	dek2_1Mocka_dir	OK	0.551362	0.394108	-0.484408	-0.439752	0.4997	0.803494	no	AT1G09650	F-box and associated interaction domains-containing protein
AT1G09660	AT1G09660	-	1:3127770-3131094	Col0Mockb_dir	dek2_1Mocka_dir	OK	14.6728	13.0983	-0.163765	-0.623632	0.342	0.697826	no	AT1G09660	RNA-binding KH domain-containing protein
AT1G09665	AT1G09665	-	1:3133094-3133674	Col0Mockb_dir	dek2_1Mocka_dir	NOTEST	0	0	0	0	1	1	no	AT1G09665	Toll-Interleukin-Resistance (TIR) domain family protein
AT1G09680	AT1G09680	-	1:3134106-3135930	Col0Mockb_dir	dek2_1Mocka_dir	OK	0.441552	0.527761	0.257303	0.239595	0.69875	0.898135	no	AT1G09680	Pentatricopeptide repeat (PPR) superfamily protein
AT1G09690	AT1G09690	-	1:3136187-3137475	Col0Mockb_dir	dek2_1Mocka_dir	OK	528.008	547.688	0.0527954	0.186916	0.77125	0.92696	no	AT1G09690	Translation protein SH3-like family protein
AT1G09700	AT1G09700	-	1:3137766-3140353	Col0Mockb_dir	dek2_1Mocka_dir	OK	8.04181	7.24233	-0.151067	-0.504236	0.4288	0.763507	no	HYL1	dsRNA-binding domain-like superfamily protein
AT1G09710	AT1G09710	-	1:3140867-3144370	Col0Mockb_dir	dek2_1Mocka_dir	OK	6.07392	4.47767	-0.439879	-1.43808	0.02475	0.217855	no	AT1G09710	Homeodomain-like superfamily protein
AT1G09720	AT1G09720	-	1:3144437-3147303	Col0Mockb_dir	dek2_1Mocka_dir	NOTEST	0	0.0136925	inf	0	1	1	no	NET2B	Kinase interacting (KIP1-like) family protein
AT1G09730	AT1G09730	-	1:3147666-3154380	Col0Mockb_dir	dek2_1Mocka_dir	OK	6.75949	6.03827	-0.16278	-0.604634	0.3491	0.702493	no	AT1G09730	Cysteine proteinases superfamily protein
AT1G09740	AT1G09740	-	1:3154531-3156275	Col0Mockb_dir	dek2_1Mocka_dir	OK	6.9523	7.67012	0.141759	0.401224	0.5259	0.818058	no	AT1G09740	Adenine nucleotide alpha hydrolases-like superfamily protein
AT1G09750	AT1G09750	-	1:3157500-3161692	Col0Mockb_dir	dek2_1Mocka_dir	OK	65.2108	60.9406	-0.0977086	-0.349681	0.64455	0.876415	no	AT1G09750	Eukaryotic aspartyl protease family protein
AT1G09760	AT1G09760	-	1:3157500-3161692	Col0Mockb_dir	dek2_1Mocka_dir	OK	22.8334	22.2709	-0.035986	-0.0720781	0.9098	0.971386	no	U2A'	U2 small nuclear ribonucleoprotein A
AT1G09770	AT1G09770	-	1:3161840-3165360	Col0Mockb_dir	dek2_1Mocka_dir	OK	16.2856	16.808	0.0455543	0.18227	0.7883	0.932566	no	CDC5	cell division cycle 5
AT1G09780	AT1G09780	-	1:3165369-3167869	Col0Mockb_dir	dek2_1Mocka_dir	OK	89.3989	82.9332	-0.108307	-0.411721	0.52015	0.8149	no	iPGAM1	Phosphoglycerate mutase, 2,3-bisphosphoglycerate-independent
AT1G09790	AT1G09790	-	1:3168481-3170819	Col0Mockb_dir	dek2_1Mocka_dir	OK	0.360052	0.516388	0.52025	0.523731	0.43545	0.767805	no	COBL6	COBRA-like protein 6 precursor
AT1G09794	AT1G09794	-	1:3172107-3173463	Col0Mockb_dir	dek2_1Mocka_dir	OK	3.97248	4.79632	0.271885	0.571931	0.3664	0.715817	no	AT1G09794	Cox19 family protein (CHCH motif)
AT1G09795	AT1G09795	-	1:3173533-3180421	Col0Mockb_dir	dek2_1Mocka_dir	OK	13.6601	11.3134	-0.271933	-0.921393	0.1537	0.506999	no	ATP-PRT2	ATP phosphoribosyl transferase 2
AT1G09800	AT1G09800	-	1:3173533-3180421	Col0Mockb_dir	dek2_1Mocka_dir	OK	1.51088	1.77801	0.234877	0.215099	0.71805	0.906405	no	AT1G09800	Pseudouridine synthase family protein
AT1G09810	AT1G09810	-	1:3180935-3184224	Col0Mockb_dir	dek2_1Mocka_dir	OK	4.00614	3.95828	-0.0173385	-0.0500735	0.93645	0.980464	no	ECT11	evolutionarily conserved C-terminal region 11
AT1G09812	AT1G09812	-	1:3187816-3188580	Col0Mockb_dir	dek2_1Mocka_dir	OK	1.45082	0.863067	-0.74932	-0.659271	0.3224	0.68389	no	AT1G09812	multidrug resistance protein
AT1G09815	AT1G09815	-	1:3189368-3190242	Col0Mockb_dir	dek2_1Mocka_dir	OK	35.8755	35.2564	-0.0251135	-0.0903146	0.8877	0.964315	no	POLD4	polymerase delta 4
AT1G09820	AT1G09820	-	1:3190287-3192414	Col0Mockb_dir	dek2_1Mocka_dir	OK	3.00329	2.29254	-0.389592	-0.874499	0.1853	0.548201	no	AT1G09820	Pentatricopeptide repeat (PPR-like) superfamily protein
AT1G09830	AT1G09830	-	1:3192680-3195025	Col0Mockb_dir	dek2_1Mocka_dir	OK	25.1331	22.6322	-0.151208	-0.586286	0.37085	0.719575	no	PUR2	Glycinamide ribonucleotide (GAR) synthetase
AT1G09840	AT1G09840	-	1:3195823-3200291	Col0Mockb_dir	dek2_1Mocka_dir	OK	6.40797	5.46658	-0.229227	-0.775055	0.22945	0.597381	no	SK41	shaggy-like protein kinase 41
AT1G09850	AT1G09850	-	1:3201798-3205309	Col0Mockb_dir	dek2_1Mocka_dir	OK	7.75692	8.29146	0.0961425	0.302984	0.6413	0.876146	no	XBCP3	xylem bark cysteine peptidase 3
AT1G09860	AT1G09860	-	1:3201798-3205309	Col0Mockb_dir	dek2_1Mocka_dir	OK	0.533015	0.233529	-1.19058	-0.529335	0.5378	0.824018	no	PUP16	purine permease 16
AT1G09870	AT1G09870	-	1:3205740-3208598	Col0Mockb_dir	dek2_1Mocka_dir	OK	4.82917	5.14637	0.0917791	0.272015	0.66905	0.886008	no	AT1G09870	histidine acid phosphatase family protein
AT1G09880	AT1G09880	-	1:3208827-3211653	Col0Mockb_dir	dek2_1Mocka_dir	NOTEST	0.199705	0.290077	0.538569	0	1	1	no	AT1G09880	Rhamnogalacturonate lyase family protein
AT1G09890	AT1G09890	-	1:3214236-3217538	Col0Mockb_dir	dek2_1Mocka_dir	NOTEST	0.318608	0.485241	0.606922	0	1	1	no	AT1G09890	Rhamnogalacturonate lyase family protein
AT1G09900	AT1G09900	-	1:3218132-3219929	Col0Mockb_dir	dek2_1Mocka_dir	OK	9.06485	9.03325	-0.00503812	-0.0157491	0.981	0.993912	no	AT1G09900	Pentatricopeptide repeat (PPR-like) superfamily protein
AT1G09910	AT1G09910	-	1:3220034-3224541	Col0Mockb_dir	dek2_1Mocka_dir	OK	1.93516	1.98818	0.0389968	0.0990456	0.8785	0.960446	no	AT1G09910	Rhamnogalacturonate lyase family protein
AT1G09920	AT1G09920	-	1:3224683-3227070	Col0Mockb_dir	dek2_1Mocka_dir	OK	25.2945	19.0562	-0.408559	-1.54066	0.02065	0.200435	no	AT1G09920	TRAF-type zinc finger-like protein
AT1G09930	AT1G09930	-	1:3227489-3230043	Col0Mockb_dir	dek2_1Mocka_dir	NOTEST	0	0.0131543	inf	0	1	1	no	OPT2	oligopeptide transporter 2
AT1G09932	AT1G09932	-	1:3230449-3233109	Col0Mockb_dir	dek2_1Mocka_dir	NOTEST	0.485211	0.495497	0.0302653	0	1	1	no	AT1G09932	Phosphoglycerate mutase family protein
AT1G09935	AT1G09935	-	1:3234059-3235530	Col0Mockb_dir	dek2_1Mocka_dir	NOTEST	0	0	0	0	1	1	no	AT1G09935	Phosphoglycerate mutase family protein
AT1G09940	AT1G09940	-	1:3236994-3239554	Col0Mockb_dir	dek2_1Mocka_dir	OK	10.7442	10.0166	-0.101162	-0.361985	0.57485	0.841776	no	HEMA2	Glutamyl-tRNA reductase family protein
AT1G09950	AT1G09950	-	1:3240605-3241632	Col0Mockb_dir	dek2_1Mocka_dir	NOTEST	0.186767	0.263231	0.495089	0	1	1	no	RAS1	RESPONSE TO ABA AND SALT 1
AT1G09960	AT1G09960	-	1:3244212-3247200	Col0Mockb_dir	dek2_1Mocka_dir	OK	2.11099	2.60528	0.30352	0.71218	0.2724	0.641185	no	SUT4	sucrose transporter 4
AT1G09970	AT1G09970	-	1:3252239-3255693	Col0Mockb_dir	dek2_1Mocka_dir	OK	32.7956	34.3285	0.0659047	0.262869	0.6933	0.896235	no	LRR XI-23	Leucine-rich receptor-like protein kinase family protein
AT1G09980	AT1G09980	-	1:3256244-3261614	Col0Mockb_dir	dek2_1Mocka_dir	OK	6.01956	5.51088	-0.127374	-0.451275	0.49045	0.798995	no	AT1G09980	Putative serine esterase family protein
AT1G09995	AT1G09995	-	1:3262264-3263612	Col0Mockb_dir	dek2_1Mocka_dir	OK	6.11408	7.04065	0.203573	0.484218	0.44315	0.771488	no	AT1G09995	DNA repair DEAD helicase RAD3/XP-D subfamily protein
AT1G10000	AT1G10000	-	1:3263876-3264788	Col0Mockb_dir	dek2_1Mocka_dir	OK	0.106932	1.08226	3.33928	1.83671	0.06905	0.356276	no	AT1G10000	Ribonuclease H-like superfamily protein
AT1G10010	AT1G10010	-	1:3265975-3268726	Col0Mockb_dir	dek2_1Mocka_dir	NOTEST	0	0.0283407	inf	0	1	1	no	AAP8	amino acid permease 8
AT1G10020	AT1G10020	-	1:3269603-3271987	Col0Mockb_dir	dek2_1Mocka_dir	OK	8.0713	10.4826	0.377119	1.35078	0.0468	0.3049	no	AT1G10020	formin-like protein (DUF1005)
AT1G10030	AT1G10030	-	1:3273824-3275837	Col0Mockb_dir	dek2_1Mocka_dir	OK	6.6705	7.79618	0.224973	0.647884	0.31435	0.676511	no	ERG28	ergosterol biosynthesis protein
AT1G10040	AT1G10040	-	1:3275890-3278697	Col0Mockb_dir	dek2_1Mocka_dir	OK	0.860709	0.752093	-0.194615	-0.287396	0.654	0.879522	no	AT1G10040	alpha/beta-Hydrolases superfamily protein
AT1G10050	AT1G10050	-	1:3279269-3283482	Col0Mockb_dir	dek2_1Mocka_dir	OK	3.4693	3.27057	-0.0851017	-0.264968	0.6782	0.889031	no	AT1G10050	glycosyl hydrolase family 10 protein / carbohydrate-binding domain-containing protein
AT1G10060	AT1G10060	-	1:3284238-3287107	Col0Mockb_dir	dek2_1Mocka_dir	OK	1.64569	1.64658	0.000773652	0.00155026	0.9965	0.998302	no	BCAT-1	branched-chain amino acid transaminase 1
AT1G10070	AT1G10070	-	1:3288086-3296198	Col0Mockb_dir	dek2_1Mocka_dir	OK	0.774598	0.627387	-0.304092	-0.261565	0.69325	0.896235	no	BCAT-2	branched-chain amino acid transaminase 2
AT1G10090	AT1G10090	-	1:3288086-3296198	Col0Mockb_dir	dek2_1Mocka_dir	OK	3.4232	3.55394	0.0540762	0.172197	0.7877	0.932566	no	AT1G10090	Early-responsive to dehydration stress protein (ERD4)
AT1G10095	AT1G10095	-	1:3297323-3300443	Col0Mockb_dir	dek2_1Mocka_dir	OK	1.08475	0.954701	-0.184243	-0.306366	0.6311	0.870261	no	AT1G10095	Protein prenylyltransferase superfamily protein
AT1G10100	AT1G10100	-	1:3300696-3301489	Col0Mockb_dir	dek2_1Mocka_dir	NOTEST	0	0.131091	inf	0	1	1	no	AT1G10100	hypothetical protein
AT1G10110	AT1G10110	-	1:3302741-3306824	Col0Mockb_dir	dek2_1Mocka_dir	NOTEST	0.317186	0.468507	0.56274	0	1	1	no	AT1G10110	F-box family protein
AT1G10120	AT1G10120	-	1:3302741-3306824	Col0Mockb_dir	dek2_1Mocka_dir	OK	3.89425	4.10151	0.0748097	0.204362	0.7494	0.920966	no	AT1G10120	basic helix-loop-helix (bHLH) DNA-binding superfamily protein
AT1G10130	AT1G10130	-	1:3310929-3322213	Col0Mockb_dir	dek2_1Mocka_dir	OK	1.3841	1.12626	-0.297409	-0.873329	0.1869	0.550647	no	ECA3	endoplasmic reticulum-type calcium-transporting ATPase 3
AT1G10140	AT1G10140	-	1:3322801-3323548	Col0Mockb_dir	dek2_1Mocka_dir	OK	20.2233	22.0679	0.125937	0.453971	0.5423	0.825864	no	AT1G10140	Uncharacterized conserved protein UCP031279
AT1G10150	AT1G10150	-	1:3325823-3327614	Col0Mockb_dir	dek2_1Mocka_dir	OK	15.2293	15.8128	0.0542427	0.186784	0.7759	0.929299	no	AT1G10150	Carbohydrate-binding protein
AT1G10155	AT1G10155	-	1:3327636-3328448	Col0Mockb_dir	dek2_1Mocka_dir	OK	1.84969	1.04101	-0.829301	-0.816664	0.2237	0.592235	no	PP2-A10	phloem protein 2-A10
AT1G10170	AT1G10170	-	1:3333594-3337491	Col0Mockb_dir	dek2_1Mocka_dir	OK	9.8421	7.96473	-0.30534	-1.21981	0.08365	0.391996	no	NFXL1	NF-X-like 1
AT1G10180	AT1G10180	-	1:3338302-3341608	Col0Mockb_dir	dek2_1Mocka_dir	OK	6.41263	5.40429	-0.246811	-0.831387	0.19925	0.566118	no	AT1G10180	LOW protein: exocyst complex component-like protein
AT1G10190	AT1G10190	-	1:3343685-3345632	Col0Mockb_dir	dek2_1Mocka_dir	NOTEST	0	0	0	0	1	1	no	AT1G10190	NEP-interacting protein, putative (DUF239)
AT1G10200	AT1G10200	-	1:3346389-3347885	Col0Mockb_dir	dek2_1Mocka_dir	OK	21.2049	24.5954	0.213991	0.770171	0.22985	0.597616	no	WLIM1	GATA type zinc finger transcription factor family protein
AT1G10210	AT1G10210	-	1:3349218-3351180	Col0Mockb_dir	dek2_1Mocka_dir	OK	3.12002	3.97885	0.350797	0.810515	0.2112	0.579523	no	MPK1	mitogen-activated protein kinase 1
AT1G10220	AT1G10220	-	1:3352158-3354856	Col0Mockb_dir	dek2_1Mocka_dir	NOTEST	0.0207816	0.338623	4.0263	0	1	1	no	AT1G10220	ZCF37
AT1G10230	AT1G10230	-	1:3355570-3356359	Col0Mockb_dir	dek2_1Mocka_dir	OK	13.0123	9.36482	-0.474549	-1.31085	0.0582	0.331808	no	SK18	E3 ubiquitin ligase SCF complex subunit SKP1/ASK1 family protein
AT1G10240	AT1G10240	-	1:3356679-3359838	Col0Mockb_dir	dek2_1Mocka_dir	OK	4.96795	4.24229	-0.227805	-0.695322	0.2848	0.652915	no	FRS11	FAR1-related sequence 11
AT1G10250	AT1G10250	-	1:3360086-3360508	Col0Mockb_dir	dek2_1Mocka_dir	NOTEST	0	0	0	0	1	1	no	AT1G10250	paired amphipathic helix Sin3-like protein
AT1G10270	AT1G10270	-	1:3363503-3366488	Col0Mockb_dir	dek2_1Mocka_dir	OK	4.11792	4.05348	-0.0227552	-0.0733564	0.91395	0.973159	no	GRP23	glutamine-rich protein 23
AT1G10280	AT1G10280	-	1:3366492-3369095	Col0Mockb_dir	dek2_1Mocka_dir	OK	1.88384	2.12253	0.172106	0.36148	0.58065	0.844557	no	AT1G10280	Core-2/I-branching beta-1,6-N-acetylglucosaminyltransferase family protein
AT1G10290	AT1G10290	-	1:3370557-3377463	Col0Mockb_dir	dek2_1Mocka_dir	OK	9.64412	8.91609	-0.113238	-0.437341	0.4989	0.803317	no	ADL6	dynamin-like protein 6
AT1G10300	AT1G10300	-	1:3378141-3380226	Col0Mockb_dir	dek2_1Mocka_dir	OK	0.562074	0.731012	0.379133	0.488342	0.4626	0.782261	no	AT1G10300	Nucleolar GTP-binding protein
AT1G10310	AT1G10310	-	1:3381600-3383914	Col0Mockb_dir	dek2_1Mocka_dir	OK	6.54538	5.79859	-0.174776	-0.523646	0.41465	0.753383	no	AT1G10310	NAD(P)-binding Rossmann-fold superfamily protein
AT1G10320	AT1G10320	-	1:3384163-3388373	Col0Mockb_dir	dek2_1Mocka_dir	OK	6.7157	5.20931	-0.366446	-1.3285	0.0431	0.292871	no	AT1G10320	Zinc finger C-x8-C-x5-C-x3-H type family protein
AT1G10330	AT1G10330	-	1:3388746-3390150	Col0Mockb_dir	dek2_1Mocka_dir	OK	0.78498	0.461031	-0.767791	-0.723259	0.24575	0.614283	no	AT1G10330	Tetratricopeptide repeat (TPR)-like superfamily protein
AT1G10340	AT1G10340	-	1:3390321-3392571	Col0Mockb_dir	dek2_1Mocka_dir	OK	0.340479	0.540569	0.666913	0.727982	0.26655	0.635823	no	AT1G10340	Ankyrin repeat family protein
AT1G10350	AT1G10350	-	1:3393406-3395055	Col0Mockb_dir	dek2_1Mocka_dir	OK	13.2483	10.0003	-0.405771	-1.39522	0.03555	0.264069	no	AT1G10350	DNAJ heat shock family protein
AT1G10360	AT1G10360	-	1:3395557-3396849	Col0Mockb_dir	dek2_1Mocka_dir	OK	53.877	43.3551	-0.313469	-1.22588	0.05995	0.335643	no	GSTU18	glutathione S-transferase TAU 18
AT1G10370	AT1G10370	-	1:3397080-3398358	Col0Mockb_dir	dek2_1Mocka_dir	OK	206.771	164.894	-0.326497	-1.26513	0.056	0.325349	no	ERD9	Glutathione S-transferase family protein
AT1G10380	AT1G10380	-	1:3400605-3402324	Col0Mockb_dir	dek2_1Mocka_dir	OK	12.7981	9.76038	-0.39092	-1.29096	0.05125	0.314795	no	AT1G10380	Putative membrane lipoprotein
AT1G10385	AT1G10385	-	1:3403223-3405856	Col0Mockb_dir	dek2_1Mocka_dir	NOTEST	0.116178	0.173484	0.578475	0	1	1	no	AT1G10385	Vps51/Vps67 family (components of vesicular transport) protein
AT1G10390	AT1G10390	-	1:3407023-3412843	Col0Mockb_dir	dek2_1Mocka_dir	OK	21.0596	16.1553	-0.382473	-1.52886	0.02175	0.204832	no	AT1G10390	Nucleoporin autopeptidase
AT1G10400	AT1G10400	-	1:3414851-3416358	Col0Mockb_dir	dek2_1Mocka_dir	OK	0.79682	1.07449	0.431322	0.580679	0.37125	0.719678	no	AT1G10400	UDP-Glycosyltransferase superfamily protein
AT1G10410	AT1G10410	-	1:3416679-3419639	Col0Mockb_dir	dek2_1Mocka_dir	OK	7.30177	6.79839	-0.103052	-0.335863	0.6058	0.857679	no	AT1G10410	CW14 protein (DUF1336)
AT1G10417	AT1G10417	-	1:3424185-3427457	Col0Mockb_dir	dek2_1Mocka_dir	NOTEST	0.303943	0.445258	0.550839	0	1	1	no	AT1G10417	RUN/FYVE domain protein
AT1G10430	AT1G10430	-	1:3428477-3430633	Col0Mockb_dir	dek2_1Mocka_dir	OK	8.27533	7.94359	-0.059025	-0.186991	0.778	0.929412	no	PP2A-2	protein phosphatase 2A-2
AT1G10450	AT1G10450	-	1:3431779-3438370	Col0Mockb_dir	dek2_1Mocka_dir	OK	1.54693	1.95962	0.341171	0.951956	0.1354	0.484557	no	SNL6	paired amphipathic helix Sin3-like protein
AT1G10455	AT1G10455	-	1:3438554-3439013	Col0Mockb_dir	dek2_1Mocka_dir	NOTEST	0	0.467816	inf	0	1	1	no	AT1G10455	B3 DNA-binding domain protein
AT1G10460	AT1G10460	-	1:3439321-3440320	Col0Mockb_dir	dek2_1Mocka_dir	OK	3.1642	2.71935	-0.218579	-0.378198	0.5867	0.848063	no	GLP7	germin-like protein 7
AT1G10470	AT1G10470	-	1:3442326-3443957	Col0Mockb_dir	dek2_1Mocka_dir	OK	132.552	101.662	-0.382776	-1.53062	0.0227	0.209136	no	ARR4	response regulator 4
AT1G10480	AT1G10480	-	1:3449690-3451226	Col0Mockb_dir	dek2_1Mocka_dir	OK	2.58421	3.18803	0.302941	0.581167	0.35905	0.71065	no	ZFP5	zinc finger protein 5
AT1G10490	AT1G10490	-	1:3453227-3461485	Col0Mockb_dir	dek2_1Mocka_dir	OK	3.44562	3.7372	0.117194	0.217592	0.7402	0.916493	no	AT1G10490	GNAT acetyltransferase (DUF699)
AT1G10500	AT1G10500	-	1:3453227-3461485	Col0Mockb_dir	dek2_1Mocka_dir	OK	57.6655	60.6903	0.0737573	0.248488	0.7004	0.899155	no	CPISCA	chloroplast-localized ISCA-like protein
AT1G10510	AT1G10510	-	1:3461634-3465786	Col0Mockb_dir	dek2_1Mocka_dir	OK	2.37569	2.51577	0.0826519	0.219332	0.73545	0.914142	no	emb2004	RNI-like superfamily protein
AT1G10520	AT1G10520	-	1:3465963-3469248	Col0Mockb_dir	dek2_1Mocka_dir	NOTEST	0.0798844	0.255585	1.67782	0	1	1	no	Pol{lambda}	DNA polymerase lambda (POLL)
AT1G10522	AT1G10522	-	1:3469579-3472672	Col0Mockb_dir	dek2_1Mocka_dir	OK	40.2499	33.2095	-0.277389	-1.05646	0.10365	0.431143	no	PRIN2	Serine/Threonine-kinase
AT1G10530	AT1G10530	-	1:3469579-3472672	Col0Mockb_dir	dek2_1Mocka_dir	OK	0.704171	1.32492	0.911909	0.415376	0.54455	0.826473	no	AT1G10530	D-ribose-binding periplasmic protein
AT1G10540	AT1G10540	-	1:3474863-3477927	Col0Mockb_dir	dek2_1Mocka_dir	NOTEST	0.356113	0.322115	-0.144758	0	1	1	no	NAT8	nucleobase-ascorbate transporter 8
AT1G10550	AT1G10550	-	1:3479152-3480988	Col0Mockb_dir	dek2_1Mocka_dir	OK	1.52988	2.06999	0.436199	0.713273	0.24655	0.615048	no	XTH33	xyloglucan:xyloglucosyl transferase 33
AT1G10560	AT1G10560	-	1:3484579-3486965	Col0Mockb_dir	dek2_1Mocka_dir	OK	1.01995	0.998415	-0.0307914	-0.0530229	0.9349	0.980181	no	PUB18	plant U-box 18
AT1G10570	AT1G10570	-	1:3487583-3491277	Col0Mockb_dir	dek2_1Mocka_dir	OK	1.44102	1.92331	0.416502	0.917623	0.1484	0.501538	no	OTS2	Cysteine proteinases superfamily protein
AT1G10580	AT1G10580	-	1:3491280-3493737	Col0Mockb_dir	dek2_1Mocka_dir	OK	10.2893	10.75	0.063198	0.241935	0.7212	0.908368	no	AT1G10580	Transducin/WD40 repeat-like superfamily protein
AT1G10585	AT1G10585	-	1:3493939-3495144	Col0Mockb_dir	dek2_1Mocka_dir	NOTEST	0.249241	0.400687	0.684934	0	1	1	no	AT1G10585	basic helix-loop-helix (bHLH) DNA-binding superfamily protein
AT1G10586	AT1G10586	-	1:3496927-3499439	Col0Mockb_dir	dek2_1Mocka_dir	NOTEST	0	0	0	0	1	1	no	AT1G10586	basic helix-loop-helix (bHLH) DNA-binding superfamily protein
AT1G10588	AT1G10588	-	1:3501144-3501904	Col0Mockb_dir	dek2_1Mocka_dir	NOTEST	0	0	0	0	1	1	no	AT1G10588	Gibberellin-regulated family protein
AT1G10590	AT1G10590	-	1:3502003-3503457	Col0Mockb_dir	dek2_1Mocka_dir	OK	81.0544	82.8086	0.0308897	0.119383	0.84805	0.952808	no	AT1G10590	Nucleic acid-binding, OB-fold-like protein
AT1G10600	AT1G10600	-	1:3503703-3505502	Col0Mockb_dir	dek2_1Mocka_dir	OK	11.5149	7.67458	-0.58534	-1.78407	0.007	0.113647	no	AMSH2	associated molecule with the SH3 domain of STAM 2
AT1G10610	AT1G10610	-	1:3506185-3511975	Col0Mockb_dir	dek2_1Mocka_dir	OK	3.05679	2.70782	-0.174888	-0.438356	0.4941	0.800786	no	AT1G10610	basic helix-loop-helix (bHLH) DNA-binding superfamily protein
AT1G10620	AT1G10620	-	1:3506185-3511975	Col0Mockb_dir	dek2_1Mocka_dir	NOTEST	0	0.0026129	inf	0	1	1	no	PERK11	Protein kinase superfamily protein
AT1G10630	AT1G10630	-	1:3512794-3514729	Col0Mockb_dir	dek2_1Mocka_dir	OK	12.5232	14.9689	0.257367	0.868263	0.17055	0.530296	no	ARFA1F	ADP-ribosylation factor A1F
AT1G10640	AT1G10640	-	1:3515364-3517888	Col0Mockb_dir	dek2_1Mocka_dir	OK	10.8472	9.51005	-0.189796	-0.650742	0.3082	0.672089	no	AT1G10640	Pectin lyase-like superfamily protein
AT1G10650	AT1G10650	-	1:3524017-3526346	Col0Mockb_dir	dek2_1Mocka_dir	OK	19.9593	14.9794	-0.414085	-1.50316	0.02025	0.198781	no	AT1G10650	SBP (S-ribonuclease binding protein) family protein
AT1G10652	AT1G10652	-	1:3527708-3527831	Col0Mockb_dir	dek2_1Mocka_dir	NOTEST	0	0	0	0	1	1	no
AT1G10657	AT1G10657	-	1:3530466-3531842	Col0Mockb_dir	dek2_1Mocka_dir	OK	16.4937	17.6318	0.0962598	0.314522	0.6255	0.868703	no	AT1G10657	transmembrane protein
AT1G10660	AT1G10660	-	1:3532423-3535131	Col0Mockb_dir	dek2_1Mocka_dir	OK	11.7169	10.62	-0.141802	-0.503075	0.45515	0.777767	no	AT1G10660	transmembrane protein
AT1G10670	AT1G10670	-	1:3535382-3538439	Col0Mockb_dir	dek2_1Mocka_dir	OK	61.6375	60.9285	-0.0166908	-0.0639233	0.9182	0.974095	no	ACLA-1	ATP-citrate lyase A-1
AT1G10680	AT1G10680	-	1:3538469-3543782	Col0Mockb_dir	dek2_1Mocka_dir	NOTEST	0.00494726	0.0228139	2.20521	0	1	1	no	PGP10	P-glycoprotein 10
AT1G10690	AT1G10690	-	1:3549991-3550632	Col0Mockb_dir	dek2_1Mocka_dir	OK	8.97019	4.05932	-1.1439	-2.23564	0.0037	0.0775677	no	AT1G10690	cyclin-dependent kinase inhibitor
AT1G10700	AT1G10700	-	1:3554103-3556503	Col0Mockb_dir	dek2_1Mocka_dir	OK	4.4069	4.94802	0.167088	0.465087	0.46675	0.784289	no	PRS3	phosphoribosyl pyrophosphate (PRPP) synthase 3
AT1G10710	AT1G10710	-	1:3558357-3561634	Col0Mockb_dir	dek2_1Mocka_dir	NOTEST	0.0580957	0.0505197	-0.201585	0	1	1	no	PHS1	poor homologous synapsis 1
AT1G10717	AT1G10717	-	1:3562179-3562554	Col0Mockb_dir	dek2_1Mocka_dir	NOTEST	0	0	0	0	1	1	no	AT1G10717	EMBRYO SURROUNDING FACTOR-like protein
AT1G10720	AT1G10720	-	1:3562951-3564759	Col0Mockb_dir	dek2_1Mocka_dir	OK	13.574	10.7382	-0.338093	-1.15884	0.07505	0.371652	no	AT1G10720	BSD domain-containing protein
AT1G10730	AT1G10730	-	1:3565462-3567779	Col0Mockb_dir	dek2_1Mocka_dir	NOTEST	0.339116	0.292917	-0.211288	0	1	1	no	AT1G10730	Clathrin adaptor complexes medium subunit family protein
AT1G10740	AT1G10740	-	1:3567904-3570838	Col0Mockb_dir	dek2_1Mocka_dir	OK	9.40072	10.6911	0.185565	0.651422	0.3164	0.678647	no	AT1G10740	alpha/beta-Hydrolases superfamily protein
AT1G10745	AT1G10745	-	1:3572709-3573066	Col0Mockb_dir	dek2_1Mocka_dir	NOTEST	0	0	0	0	1	1	no	AT1G10745	maternally expressed family protein
AT1G10747	AT1G10747	-	1:3574311-3578474	Col0Mockb_dir	dek2_1Mocka_dir	NOTEST	0	0	0	0	1	1	no	AT1G10747	maternally expressed family protein
AT1G10750	AT1G10750	-	1:3574311-3578474	Col0Mockb_dir	dek2_1Mocka_dir	OK	0.827833	1.31413	0.666695	1.16668	0.07535	0.372675	no	AT1G10750	carboxyl-terminal peptidase, putative (DUF239)
AT1G10760	AT1G10760	-	1:3581033-3590928	Col0Mockb_dir	dek2_1Mocka_dir	OK	7.7053	7.12529	-0.112901	-0.435072	0.5	0.803652	no	SEX1	Pyruvate phosphate dikinase, PEP/pyruvate binding domain-containing protein
AT1G10770	AT1G10770	-	1:3591632-3592411	Col0Mockb_dir	dek2_1Mocka_dir	NOTEST	0.278907	0.0116361	-4.58311	0	1	1	no	AT1G10770	Plant invertase/pectin methylesterase inhibitor superfamily protein
AT1G10780	AT1G10780	-	1:3592745-3595077	Col0Mockb_dir	dek2_1Mocka_dir	OK	6.39943	5.06445	-0.337538	-0.978011	0.13095	0.476154	no	AT1G10780	F-box/RNI-like superfamily protein
AT1G10790	AT1G10790	-	1:3596359-3597847	Col0Mockb_dir	dek2_1Mocka_dir	OK	1.03597	0.55599	-0.897849	-0.930875	0.1875	0.551258	no	AT1G10790	hydroxyproline-rich glycoprotein family protein
AT1G10800	AT1G10800	-	1:3598157-3598591	Col0Mockb_dir	dek2_1Mocka_dir	OK	0.837904	1.10821	0.403377	0.266455	0.6939	0.896235	no	AT1G10800	voltage-gated hydrogen channel-like protein
AT1G10810	AT1G10810	-	1:3599270-3600877	Col0Mockb_dir	dek2_1Mocka_dir	OK	2.34589	1.86974	-0.327299	-0.609909	0.351	0.703523	no	AT1G10810	NAD(P)-linked oxidoreductase superfamily protein
AT1G10820	AT1G10820	-	1:3600909-3605076	Col0Mockb_dir	dek2_1Mocka_dir	OK	6.56049	5.16184	-0.345918	-1.15836	0.07595	0.373604	no	AT1G10820	hypothetical protein (DUF3755)
AT1G10830	AT1G10830	-	1:3605575-3607493	Col0Mockb_dir	dek2_1Mocka_dir	OK	32.8	27.2734	-0.266199	-1.04777	0.11705	0.453924	no	Z-ISO	15-cis-zeta-carotene isomerase
AT1G10840	AT1G10840	-	1:3607630-3610520	Col0Mockb_dir	dek2_1Mocka_dir	OK	22.7796	19.4856	-0.225336	-0.873675	0.18185	0.544539	no	TIF3H1	translation initiation factor 3 subunit H1
AT1G10850	AT1G10850	-	1:3611746-3616159	Col0Mockb_dir	dek2_1Mocka_dir	OK	13.7411	12.2097	-0.170467	-0.589813	0.3716	0.71991	no	AT1G10850	Leucine-rich repeat protein kinase family protein
AT1G10865	AT1G10865	-	1:3611746-3616159	Col0Mockb_dir	dek2_1Mocka_dir	OK	11.0266	8.57717	-0.362415	-0.630417	0.3343	0.69081	no	AT1G10865	cytochrome C oxidase assembly factor
AT1G10870	AT1G10870	-	1:3616609-3623758	Col0Mockb_dir	dek2_1Mocka_dir	OK	4.37152	4.26776	-0.0346556	-0.123056	0.8513	0.954003	no	AGD4	ARF-GAP domain 4
AT1G10880	AT1G10880	-	1:3624034-3627082	Col0Mockb_dir	dek2_1Mocka_dir	NOTEST	0.0267494	0	#NAME?	0	1	1	no	AT1G10880	core-2/I-branching beta-1,6-n-acetylglucosaminyltransferase family protein
AT1G10890	AT1G10890	-	1:3627725-3630765	Col0Mockb_dir	dek2_1Mocka_dir	OK	31.656	23.9625	-0.401701	-1.57361	0.0168	0.183128	no	AT1G10890	arginine/glutamate-rich 1 protein
AT1G10900	AT1G10900	-	1:3632233-3637141	Col0Mockb_dir	dek2_1Mocka_dir	OK	11.0459	9.74394	-0.180936	-0.683144	0.29375	0.660559	no	AT1G10900	Phosphatidylinositol-4-phosphate 5-kinase family protein
AT1G10910	AT1G10910	-	1:3639877-3644162	Col0Mockb_dir	dek2_1Mocka_dir	OK	7.26781	7.23272	-0.00698302	-0.0247895	0.9687	0.990765	no	EMB3103	Pentatricopeptide repeat (PPR) superfamily protein
AT1G10920	AT1G10920	-	1:3644419-3647768	Col0Mockb_dir	dek2_1Mocka_dir	OK	2.95851	2.3087	-0.357789	-0.940199	0.14905	0.501538	no	LOV1	NB-ARC domain-containing disease resistance protein
AT1G10930	AT1G10930	-	1:3647893-3655590	Col0Mockb_dir	dek2_1Mocka_dir	OK	2.482	2.60839	0.0716561	0.232888	0.72225	0.908715	no	RECQ4A	DNA helicase (RECQl4A)
AT1G10940	AT1G10940	-	1:3655776-3658608	Col0Mockb_dir	dek2_1Mocka_dir	OK	49.0079	38.9144	-0.332712	-1.28684	0.04675	0.304792	no	SNRK2.4	Protein kinase superfamily protein
AT1G10950	AT1G10950	-	1:3659208-3663984	Col0Mockb_dir	dek2_1Mocka_dir	OK	17.1452	16.6453	-0.0426882	-0.168597	0.79955	0.935703	no	TMN1	transmembrane nine 1
AT1G10960	AT1G10960	-	1:3664385-3665039	Col0Mockb_dir	dek2_1Mocka_dir	OK	944.655	818.876	-0.206144	-0.83559	0.2544	0.62349	no	FD1	ferredoxin 1
AT1G10970	AT1G10970	-	1:3665086-3667139	Col0Mockb_dir	dek2_1Mocka_dir	OK	2.58821	2.21	-0.227907	-0.48354	0.4685	0.785905	no	ZIP4	zinc transporter
AT1G10980	AT1G10980	-	1:3667247-3669902	Col0Mockb_dir	dek2_1Mocka_dir	NOTEST	0.309141	0.125538	-1.30014	0	1	1	no	AT1G10980	Lung seven transmembrane receptor family protein
AT1G10990	AT1G10990	-	1:3670277-3671187	Col0Mockb_dir	dek2_1Mocka_dir	OK	3.59994	2.89085	-0.31648	-0.553964	0.4244	0.760973	no	AT1G10990	transmembrane protein
AT1G11000	AT1G11000	-	1:3671755-3675979	Col0Mockb_dir	dek2_1Mocka_dir	OK	4.07906	3.50076	-0.220569	-0.666748	0.2971	0.664194	no	MLO4	Seven transmembrane MLO family protein
AT1G11020	AT1G11020	-	1:3676690-3678524	Col0Mockb_dir	dek2_1Mocka_dir	OK	9.54652	9.85159	0.0453824	0.142057	0.8276	0.9455	no	AT1G11020	RING/FYVE/PHD zinc finger superfamily protein
AT1G11040	AT1G11040	-	1:3679224-3680924	Col0Mockb_dir	dek2_1Mocka_dir	NOTEST	0	0	0	0	1	1	no	AT1G11040	HSP40/DnaJ peptide-binding protein
AT1G11050	AT1G11050	-	1:3681887-3684169	Col0Mockb_dir	dek2_1Mocka_dir	OK	5.95007	10.786	0.858178	2.79142	0.0001	0.00586382	yes	AT1G11050	Protein kinase superfamily protein
AT1G11060	AT1G11060	-	1:3684567-3689847	Col0Mockb_dir	dek2_1Mocka_dir	OK	4.29177	2.56872	-0.740523	-2.33211	0.0004	0.0169316	yes	AT1G11060	WAPL (Wings apart-like protein regulation of heterochromatin) protein
AT1G11070	AT1G11070	-	1:3690211-3693648	Col0Mockb_dir	dek2_1Mocka_dir	OK	1.02742	0.609273	-0.753863	-1.29118	0.05395	0.319739	no	AT1G11070	hydroxyproline-rich glycoprotein family protein
AT1G11080	AT1G11080	-	1:3694671-3698013	Col0Mockb_dir	dek2_1Mocka_dir	OK	6.08724	4.04833	-0.588461	-1.74309	0.0059	0.102732	no	scpl31	serine carboxypeptidase-like 31
AT1G11090	AT1G11090	-	1:3702607-3709302	Col0Mockb_dir	dek2_1Mocka_dir	OK	9.98532	10.4961	0.0719678	0.206736	0.7518	0.921017	no	AT1G11090	alpha/beta-Hydrolases superfamily protein
AT1G11100	AT1G11100	-	1:3702607-3709302	Col0Mockb_dir	dek2_1Mocka_dir	NOTEST	0.448812	0.384624	-0.222662	0	1	1	no	AT1G11100	SNF2 domain-containing protein / helicase domain-containing protein / zinc finger protein-like protein
AT1G11110	AT1G11110	-	1:3710207-3712503	Col0Mockb_dir	dek2_1Mocka_dir	NOTEST	0	0.0096566	inf	0	1	1	no	AT1G11110	LisH and RanBPM domains containing protein
AT1G11112	AT1G11112	-	1:3712998-3713735	Col0Mockb_dir	dek2_1Mocka_dir	OK	6.59182	3.78956	-0.798645	-1.32919	0.04605	0.303103	no	AT1G11112	hypothetical protein
AT1G11120	AT1G11120	-	1:3715183-3717320	Col0Mockb_dir	dek2_1Mocka_dir	OK	0.477097	1.10153	1.20716	1.36691	0.04665	0.304738	no	AT1G11120	CTTNBP 2 amino-terminal-like protein
AT1G11125	AT1G11125	-	1:3718782-3719711	Col0Mockb_dir	dek2_1Mocka_dir	OK	1.67819	1.3225	-0.343637	-0.488172	0.46625	0.783912	no	AT1G11125	hypothetical protein
AT1G11130	AT1G11130	-	1:3722856-3727450	Col0Mockb_dir	dek2_1Mocka_dir	OK	2.3788	2.39349	0.00887789	0.0243131	0.97005	0.991027	no	SUB	Leucine-rich repeat protein kinase family protein
AT1G11145	AT1G11145	-	1:3727531-3728166	Col0Mockb_dir	dek2_1Mocka_dir	NOTEST	0.103523	0.0371191	-1.47971	0	1	1	no	AT1G11145	hypothetical protein (DUF674)
AT1G11160	AT1G11160	-	1:3733138-3739842	Col0Mockb_dir	dek2_1Mocka_dir	OK	0.473912	0.597008	0.333133	0.594722	0.3561	0.708414	no	AT1G11160	Transducin/WD40 repeat-like superfamily protein
AT1G11170	AT1G11170	-	1:3740764-3744675	Col0Mockb_dir	dek2_1Mocka_dir	OK	1.01522	1.18663	0.225073	0.413946	0.5289	0.819682	no	AT1G11170	lysine ketoglutarate reductase trans-splicing-like protein (DUF707)
AT1G11180	AT1G11180	-	1:3745773-3748521	Col0Mockb_dir	dek2_1Mocka_dir	OK	2.06846	1.69564	-0.286725	-0.585971	0.3788	0.725034	no	SCAMP2	Secretory carrier membrane protein (SCAMP) family protein
AT1G11190	AT1G11190	-	1:3750065-3752780	Col0Mockb_dir	dek2_1Mocka_dir	OK	1.22932	1.51104	0.297684	0.488424	0.45425	0.777038	no	BFN1	bifunctional nuclease i
AT1G11200	AT1G11200	-	1:3753364-3755641	Col0Mockb_dir	dek2_1Mocka_dir	OK	5.31106	6.35105	0.257995	0.721285	0.26005	0.62943	no	AT1G11200	organic solute transporter ostalpha protein (DUF300)
AT1G11210	AT1G11210	-	1:3755676-3756998	Col0Mockb_dir	dek2_1Mocka_dir	NOTEST	0.416775	0.434689	0.0607139	0	1	1	no	AT1G11210	cotton fiber protein, putative (DUF761)
AT1G11220	AT1G11220	-	1:3759861-3761165	Col0Mockb_dir	dek2_1Mocka_dir	OK	2.96947	1.62807	-0.86704	-1.62008	0.02285	0.209453	no	AT1G11220	cotton fiber, putative (DUF761)
AT1G11230	AT1G11230	-	1:3763267-3764483	Col0Mockb_dir	dek2_1Mocka_dir	NOTEST	0	0.0137576	inf	0	1	1	no	AT1G11230	transmembrane protein, putative (DUF761)
AT1G11240	AT1G11240	-	1:3766753-3768294	Col0Mockb_dir	dek2_1Mocka_dir	OK	27.0478	30.4111	0.169086	0.636523	0.32825	0.686563	no	AT1G11240	ribosomal RNA-processing protein
AT1G11250	AT1G11250	-	1:3768723-3769706	Col0Mockb_dir	dek2_1Mocka_dir	NOTEST	0.178096	0.0462829	-1.9441	0	1	1	no	SYP125	syntaxin of plants 125
AT1G11260	AT1G11260	-	1:3777327-3780337	Col0Mockb_dir	dek2_1Mocka_dir	OK	14.3262	16.8982	0.238217	0.930004	0.1655	0.522581	no	STP1	sugar transporter 1
AT1G11270	AT1G11270	-	1:3780428-3786990	Col0Mockb_dir	dek2_1Mocka_dir	OK	2.00783	1.3316	-0.592481	-1.62434	0.01705	0.184382	no	AT1G11270	F-box and associated interaction domains-containing protein
AT1G11280	AT1G11280	-	1:3787333-3790876	Col0Mockb_dir	dek2_1Mocka_dir	OK	10.8735	8.90021	-0.288899	-1.04542	0.10435	0.431982	no	AT1G11280	S-locus lectin protein kinase family protein
AT1G11290	AT1G11290	-	1:3791453-3793883	Col0Mockb_dir	dek2_1Mocka_dir	OK	0.851268	0.947997	0.15527	0.242797	0.71075	0.903379	no	CRR22	Pentatricopeptide repeat (PPR) superfamily protein
AT1G11300	AT1G11300	-	1:3794237-3800719	Col0Mockb_dir	dek2_1Mocka_dir	OK	1.32102	1.24538	-0.0850697	-0.22045	0.72905	0.911175	no	AT1G11300	G-type lectin S-receptor-like Serine/Threonine-kinase
AT1G11310	AT1G11310	-	1:3800737-3804185	Col0Mockb_dir	dek2_1Mocka_dir	OK	20.0275	24.5867	0.295893	1.14716	0.0774	0.377384	no	MLO2	Seven transmembrane MLO family protein
AT1G11320	AT1G11320	-	1:3807127-3808875	Col0Mockb_dir	dek2_1Mocka_dir	OK	3.47862	3.19477	-0.122804	-0.276393	0.67215	0.886851	no	AT1G11320	GDSL esterase/lipase
AT1G11330	AT1G11330	-	1:3810092-3813607	Col0Mockb_dir	dek2_1Mocka_dir	OK	5.39468	4.64448	-0.21602	-0.68053	0.285	0.653109	no	AT1G11330	S-locus lectin protein kinase family protein
AT1G11340	AT1G11340	-	1:3814115-3817420	Col0Mockb_dir	dek2_1Mocka_dir	OK	0.943177	0.584203	-0.691058	-1.13951	0.0912	0.406132	no	AT1G11340	G-type lectin S-receptor-like Serine/Threonine-kinase
AT1G11350	AT1G11350	-	1:3817590-3820805	Col0Mockb_dir	dek2_1Mocka_dir	OK	3.71887	3.61897	-0.0392834	-0.118438	0.8546	0.955054	no	SD1-13	S-domain-1 13
AT1G11360	AT1G11360	-	1:3821442-3823088	Col0Mockb_dir	dek2_1Mocka_dir	OK	8.57943	9.13579	0.0906487	0.285863	0.65915	0.881777	no	AT1G11360	Adenine nucleotide alpha hydrolases-like superfamily protein
AT1G11362	AT1G11362	-	1:3824509-3825196	Col0Mockb_dir	dek2_1Mocka_dir	NOTEST	0	0	0	0	1	1	no	AT1G11362	Plant invertase/pectin methylesterase inhibitor superfamily protein
AT1G11370	AT1G11370	-	1:3828097-3830945	Col0Mockb_dir	dek2_1Mocka_dir	NOTEST	0	0.00455135	inf	0	1	1	no	AT1G11370	Pectin lyase-like superfamily protein
AT1G11380	AT1G11380	-	1:3832622-3834191	Col0Mockb_dir	dek2_1Mocka_dir	OK	7.05272	10.0809	0.51538	1.5146	0.0183	0.190223	no	AT1G11380	PLAC8 family protein
AT1G11390	AT1G11390	-	1:3834458-3837629	Col0Mockb_dir	dek2_1Mocka_dir	OK	3.72565	3.77441	0.0187585	0.0536799	0.9318	0.979147	no	AT1G11390	Protein kinase superfamily protein
AT1G11400	AT1G11400	-	1:3837820-3840207	Col0Mockb_dir	dek2_1Mocka_dir	OK	6.2716	5.66767	-0.14608	-0.43857	0.48645	0.797169	no	PYM	partner of Y14-MAGO
AT1G11410	AT1G11410	-	1:3841285-3844432	Col0Mockb_dir	dek2_1Mocka_dir	OK	6.29457	5.53391	-0.185809	-0.619371	0.3359	0.691854	no	AT1G11410	S-locus lectin protein kinase family protein
AT1G11420	AT1G11420	-	1:3844580-3846872	Col0Mockb_dir	dek2_1Mocka_dir	OK	0.732352	0.849935	0.214815	0.293436	0.64465	0.876415	no	DUF2	agenet domain protein (DOMAIN OF UNKNOWN FUNCTION 724 2)
AT1G11430	AT1G11430	-	1:3847242-3849162	Col0Mockb_dir	dek2_1Mocka_dir	OK	75.1768	59.2687	-0.343016	-1.31819	0.0435	0.294686	no	MORF9	plastid developmental protein DAG
AT1G11440	AT1G11440	-	1:3849359-3850662	Col0Mockb_dir	dek2_1Mocka_dir	OK	13.7295	11.2673	-0.285134	-0.901791	0.1611	0.516903	no	AT1G11440	hypothetical protein
AT1G11450	AT1G11450	-	1:3853242-3855385	Col0Mockb_dir	dek2_1Mocka_dir	OK	3.62692	3.03814	-0.255558	-0.558603	0.39525	0.739568	no	UMAMIT27	nodulin MtN21 /EamA-like transporter family protein
AT1G11460	AT1G11460	-	1:3857004-3859268	Col0Mockb_dir	dek2_1Mocka_dir	NOTEST	0.136835	0.0212067	-2.68985	0	1	1	no	UMAMIT26	nodulin MtN21 /EamA-like transporter family protein
AT1G11470	AT1G11470	-	1:3859661-3860604	Col0Mockb_dir	dek2_1Mocka_dir	NOTEST	0	0	0	0	1	1	no	AT1G11470	Pentatricopeptide repeat (PPR) superfamily protein
AT1G11475	AT1G11475	-	1:3862398-3864030	Col0Mockb_dir	dek2_1Mocka_dir	OK	4.43502	4.7977	0.113402	0.251264	0.6969	0.897609	no	NRPB10	RNA polymerases N / 8 kDa subunit
AT1G11480	AT1G11480	-	1:3864152-3866969	Col0Mockb_dir	dek2_1Mocka_dir	OK	16.8174	14.3463	-0.229275	-0.904805	0.1735	0.533313	no	AT1G11480	eukaryotic translation initiation factor-like protein
AT1G11490	AT1G11490	-	1:3868883-3870065	Col0Mockb_dir	dek2_1Mocka_dir	NOTEST	0.425008	0.372637	-0.189719	0	1	1	no	AT1G11490	zinc finger (C2H2 type) family protein
AT1G11500	AT1G11500	-	1:3870832-3871570	Col0Mockb_dir	dek2_1Mocka_dir	OK	0.441154	0.694582	0.654863	0.444625	0.50985	0.810159	no	AT1G11500	transmembrane protein, putative (DUF1218)
AT1G11510	AT1G11510	-	1:3871777-3872836	Col0Mockb_dir	dek2_1Mocka_dir	NOTEST	0	0	0	0	1	1	no	AT1G11510	DNA-binding storekeeper protein-related transcriptional regulator
AT1G11520	AT1G11520	-	1:3873028-3873619	Col0Mockb_dir	dek2_1Mocka_dir	NOTEST	0	0.0156781	inf	0	1	1	no	AT1G11520	pliceosome associated protein-like protein
AT1G11530	AT1G11530	-	1:3874436-3877155	Col0Mockb_dir	dek2_1Mocka_dir	OK	15.989	14.1069	-0.180682	-0.489354	0.44845	0.773622	no	CXXS1	C-terminal cysteine residue is changed to a serine 1
AT1G11540	AT1G11540	-	1:3874436-3877155	Col0Mockb_dir	dek2_1Mocka_dir	OK	1.19796	1.49058	0.31529	0.315496	0.61485	0.862698	no	AT1G11540	Sulfite exporter TauE/SafE family protein
AT1G11545	AT1G11545	-	1:3878549-3880361	Col0Mockb_dir	dek2_1Mocka_dir	OK	27.2864	27.6889	0.0211264	0.0804923	0.90265	0.969412	no	XTH8	xyloglucan endotransglucosylase/hydrolase 8
AT1G11560	AT1G11560	-	1:3881787-3882819	Col0Mockb_dir	dek2_1Mocka_dir	NOTEST	0	0.058639	inf	0	1	1	no	AT1G11560	Oligosaccharyltransferase complex/magnesium transporter family protein
AT1G11570	AT1G11570	-	1:3883279-3883956	Col0Mockb_dir	dek2_1Mocka_dir	OK	0.154608	1.17558	2.92669	1.69465	0.11795	0.456065	no	NTL	NTF2-like protein
AT1G11572	AT1G11572	-	1:3884355-3884952	Col0Mockb_dir	dek2_1Mocka_dir	NOTEST	0	0.265942	inf	0	1	1	no	AT1G11572	Plant thionin family protein
AT1G11580	AT1G11580	-	1:3888689-3890811	Col0Mockb_dir	dek2_1Mocka_dir	OK	72.2629	69.4979	-0.0562864	-0.220065	0.74255	0.917693	no	PMEPCRA	methylesterase PCR A
AT1G11590	AT1G11590	-	1:3892579-3894677	Col0Mockb_dir	dek2_1Mocka_dir	NOTEST	0.0243005	0	#NAME?	0	1	1	no	AT1G11590	Plant invertase/pectin methylesterase inhibitor superfamily
AT1G11593	AT1G11593	-	1:3898001-3898609	Col0Mockb_dir	dek2_1Mocka_dir	NOTEST	0	0	0	0	1	1	no	AT1G11593	Plant invertase/pectin methylesterase inhibitor superfamily protein
AT1G11600	AT1G11600	-	1:3902011-3903782	Col0Mockb_dir	dek2_1Mocka_dir	OK	4.61683	4.67133	0.016932	0.0465251	0.9421	0.982819	no	CYP77B1	cytochrome P450, family 77, subfamily B, polypeptide 1
AT1G11608	AT1G11608	-	1:3905578-3906818	Col0Mockb_dir	dek2_1Mocka_dir	NOTEST	0	0	0	0	1	1	no	AT1G11608	F-box associated ubiquitination effector family protein
AT1G11610	AT1G11610	-	1:3906861-3909338	Col0Mockb_dir	dek2_1Mocka_dir	NOTEST	0	0	0	0	1	1	no	CYP71A18	cytochrome P450, family 71, subfamily A, polypeptide 18
AT1G11620	AT1G11620	-	1:3910832-3911924	Col0Mockb_dir	dek2_1Mocka_dir	NOTEST	0	0	0	0	1	1	no	AT1G11620	F-box and associated interaction domains-containing protein
AT1G11630	AT1G11630	-	1:3912901-3914407	Col0Mockb_dir	dek2_1Mocka_dir	OK	5.68326	4.20828	-0.433488	-1.05837	0.1077	0.437582	no	AT1G11630	Tetratricopeptide repeat (TPR)-like superfamily protein
AT1G11650	AT1G11650	-	1:3914773-3918176	Col0Mockb_dir	dek2_1Mocka_dir	OK	67.4565	62.5466	-0.109026	-0.423616	0.5177	0.814804	no	RBP45B	RNA-binding (RRM/RBD/RNP motifs) family protein
AT1G11655	AT1G11655	-	1:3919271-3919774	Col0Mockb_dir	dek2_1Mocka_dir	OK	1.88484	1.35531	-0.475821	-0.496101	0.5147	0.813184	no	AT1G11655	hypothetical protein
AT1G11660	AT1G11660	-	1:3920542-3924555	Col0Mockb_dir	dek2_1Mocka_dir	OK	4.66024	4.25905	-0.129874	-0.414373	0.5171	0.814588	no	AT1G11660	heat shock protein 70 (Hsp 70) family protein
AT1G11670	AT1G11670	-	1:3928161-3931576	Col0Mockb_dir	dek2_1Mocka_dir	OK	6.52157	5.7204	-0.189104	-0.613539	0.33875	0.694321	no	AT1G11670	MATE efflux family protein
AT1G11680	AT1G11680	-	1:3938500-3940754	Col0Mockb_dir	dek2_1Mocka_dir	OK	55.753	52.2675	-0.0931353	-0.36507	0.5786	0.843488	no	CYP51G1	CYTOCHROME P450 51G1
AT1G11684	AT1G11684	-	1:3941102-3941300	Col0Mockb_dir	dek2_1Mocka_dir	OK	0	0.82132	inf	#NAME?	0.0264	0.22493	no	AT1G11684	hypothetical protein
AT1G11690	AT1G11690	-	1:3941468-3942212	Col0Mockb_dir	dek2_1Mocka_dir	NOTEST	0	0.17787	inf	0	1	1	no	AT1G11690	BRANCHLESS TRICHOME-like protein
AT1G11700	AT1G11700	-	1:3945736-3946613	Col0Mockb_dir	dek2_1Mocka_dir	OK	23.3961	17.9926	-0.378863	-1.62137	0.04705	0.30498	no	AT1G11700	senescence regulator (Protein of unknown function, DUF584)
AT1G11710	AT1G11710	-	1:3948713-3951359	Col0Mockb_dir	dek2_1Mocka_dir	OK	1.71443	1.53799	-0.156674	-0.309762	0.62885	0.869384	no	AT1G11710	Pentatricopeptide repeat (PPR) superfamily protein
AT1G11720	AT1G11720	-	1:3951552-3957044	Col0Mockb_dir	dek2_1Mocka_dir	OK	6.45507	6.83935	0.0834272	0.30351	0.6352	0.872853	no	SS3	starch synthase 3
AT1G11730	AT1G11730	-	1:3957472-3960113	Col0Mockb_dir	dek2_1Mocka_dir	OK	0.510979	0.473038	-0.111309	-0.121213	0.85145	0.954003	no	AT1G11730	Galactosyltransferase family protein
AT1G11740	AT1G11740	-	1:3963053-3966824	Col0Mockb_dir	dek2_1Mocka_dir	OK	0.581164	0.847314	0.543951	0.899266	0.1612	0.516903	no	AT1G11740	ankyrin repeat family protein
AT1G11750	AT1G11750	-	1:3967475-3971840	Col0Mockb_dir	dek2_1Mocka_dir	OK	13.5429	13.5518	0.000939032	0.00310084	0.9957	0.997952	no	CLPP6	CLP protease proteolytic subunit 6
AT1G11755	AT1G11755	-	1:3967475-3971840	Col0Mockb_dir	dek2_1Mocka_dir	OK	3.47358	3.78514	0.123921	0.18093	0.7788	0.929412	no	LEW1	Undecaprenyl pyrophosphate synthetase family protein
AT1G11760	AT1G11760	-	1:3972031-3973286	Col0Mockb_dir	dek2_1Mocka_dir	OK	7.588	6.6614	-0.187893	-0.478719	0.45565	0.778231	no	MED32	mediator of RNA polymerase II transcription subunit-like protein
AT1G11765	AT1G11765	-	1:3973874-3974509	Col0Mockb_dir	dek2_1Mocka_dir	NOTEST	0	0	0	0	1	1	no	AT1G11765	Plant self-incompatibility protein S1 family
AT1G11770	AT1G11770	-	1:3975678-3979195	Col0Mockb_dir	dek2_1Mocka_dir	NOTEST	0	0	0	0	1	1	no	AT1G11770	FAD-binding Berberine family protein
AT1G11780	AT1G11780	-	1:3975678-3979195	Col0Mockb_dir	dek2_1Mocka_dir	OK	2.72944	2.94235	0.108364	0.246065	0.6988	0.898142	no	AT1G11780	oxidoreductase, 2OG-Fe(II) oxygenase family protein
AT1G11785	AT1G11785	-	1:3979861-3980956	Col0Mockb_dir	dek2_1Mocka_dir	OK	0.440157	0.579874	0.397722	0.313866	0.67345	0.887238	no	AT1G11785	transmembrane protein
AT1G11790	AT1G11790	-	1:3981247-3985215	Col0Mockb_dir	dek2_1Mocka_dir	OK	6.75432	6.05546	-0.157576	-0.548862	0.41505	0.753629	no	ADT1	arogenate dehydratase 1
AT1G11800	AT1G11800	-	1:3985224-3987290	Col0Mockb_dir	dek2_1Mocka_dir	OK	4.17135	3.93031	-0.085872	-0.220516	0.73565	0.914152	no	AT1G11800	endonuclease/exonuclease/phosphatase family protein
AT1G11810	AT1G11810	-	1:3989762-3993598	Col0Mockb_dir	dek2_1Mocka_dir	NOTEST	0	0	0	0	1	1	no	AT1G11810	F-box associated ubiquitination effector family protein
AT1G11820	AT1G11820	-	1:3989762-3993598	Col0Mockb_dir	dek2_1Mocka_dir	OK	21.0015	20.0043	-0.0701762	-0.262659	0.685	0.891788	no	AT1G11820	O-Glycosyl hydrolases family 17 protein
AT1G11840	AT1G11840	-	1:3995168-3997907	Col0Mockb_dir	dek2_1Mocka_dir	OK	76.6311	73.897	-0.052414	-0.202625	0.75555	0.922277	no	GLX1	glyoxalase/bleomycin resistance protein/dioxygenase superfamily protein
AT1G11850	AT1G11850	-	1:3999198-3999876	Col0Mockb_dir	dek2_1Mocka_dir	OK	37.2478	44.8949	0.269399	1.03537	0.1417	0.493204	no	AT1G11850	transmembrane protein
AT1G11860	AT1G11860	-	1:4001112-4003442	Col0Mockb_dir	dek2_1Mocka_dir	OK	678.231	651.33	-0.0583865	-0.191885	0.7606	0.923968	no	AT1G11860	Glycine cleavage T-protein family
AT1G11870	AT1G11870	-	1:4003845-4006739	Col0Mockb_dir	dek2_1Mocka_dir	OK	13.3017	10.7529	-0.306884	-1.12882	0.08415	0.392812	no	SRS	Seryl-tRNA synthetase
AT1G11880	AT1G11880	-	1:4007704-4010433	Col0Mockb_dir	dek2_1Mocka_dir	OK	1.03631	1.47495	0.509209	0.845637	0.1967	0.562883	no	AT1G11880	transferases, transferring hexosyl groups
AT1G11890	AT1G11890	-	1:4010778-4014681	Col0Mockb_dir	dek2_1Mocka_dir	OK	20.1933	21.524	0.0920706	0.339333	0.61415	0.862698	no	SEC22	Synaptobrevin family protein
AT1G11900	AT1G11900	-	1:4010778-4014681	Col0Mockb_dir	dek2_1Mocka_dir	OK	2.08236	2.01197	-0.0496153	-0.0454045	0.94215	0.982819	no	AT1G11900	Tetratricopeptide repeat (TPR)-like superfamily protein
AT1G11905	AT1G11905	-	1:4014846-4016540	Col0Mockb_dir	dek2_1Mocka_dir	OK	8.64515	7.87885	-0.133907	-0.391345	0.5371	0.823451	no	AT1G11905	B-cell receptor-associated protein 31-like protein
AT1G11910	AT1G11910	-	1:4016783-4020983	Col0Mockb_dir	dek2_1Mocka_dir	OK	103.025	99.7877	-0.0460656	-0.17316	0.79805	0.935619	no	APA1	aspartic proteinase A1
AT1G11915	AT1G11915	-	1:4021824-4023292	Col0Mockb_dir	dek2_1Mocka_dir	OK	0.700335	1.00368	0.519183	0.579219	0.3659	0.715472	no	AT1G11915	wall-associated receptor kinase galacturonan-binding protein
AT1G11920	AT1G11920	-	1:4023666-4025097	Col0Mockb_dir	dek2_1Mocka_dir	NOTEST	0	0	0	0	1	1	no	AT1G11920	Pectin lyase-like superfamily protein
AT1G11925	AT1G11925	-	1:4025929-4026732	Col0Mockb_dir	dek2_1Mocka_dir	NOTEST	0.23267	0	#NAME?	0	1	1	no	AT1G11925	Stigma-specific Stig1 family protein
AT1G11930	AT1G11930	-	1:4028691-4030584	Col0Mockb_dir	dek2_1Mocka_dir	OK	10.372	9.52274	-0.123252	-0.399476	0.5326	0.821162	no	AT1G11930	Putative pyridoxal phosphate-dependent enzyme, YBL036C type
AT1G11940	AT1G11940	-	1:4031573-4034078	Col0Mockb_dir	dek2_1Mocka_dir	OK	2.39154	2.21673	-0.109506	-0.232273	0.7199	0.907878	no	AT1G11940	Core-2/I-branching beta-1,6-N-acetylglucosaminyltransferase family protein
AT1G11950	AT1G11950	-	1:4034586-4038758	Col0Mockb_dir	dek2_1Mocka_dir	OK	0.29532	0.536265	0.860666	1.10804	0.08255	0.389354	no	AT1G11950	Transcription factor jumonji (jmjC) domain-containing protein
AT1G11960	AT1G11960	-	1:4039710-4043880	Col0Mockb_dir	dek2_1Mocka_dir	OK	1.68527	2.11677	0.328882	0.800761	0.21995	0.588222	no	AT1G11960	ERD (early-responsive to dehydration stress) family protein
AT1G11970	AT1G11970	-	1:4044369-4044669	Col0Mockb_dir	dek2_1Mocka_dir	NOTEST	0	0.311462	inf	0	1	1	no	AT1G11970	Ubiquitin-like superfamily protein
AT1G11980	AT1G11980	-	1:4045618-4045855	Col0Mockb_dir	dek2_1Mocka_dir	NOTEST	0	0	0	0	1	1	no	RUB3	ubiquitin-related protein 3
AT1G11990	AT1G11990	-	1:4046245-4049060	Col0Mockb_dir	dek2_1Mocka_dir	NOTEST	0.131162	0.198622	0.598673	0	1	1	no	AT1G11990	O-fucosyltransferase family protein
AT1G12000	AT1G12000	-	1:4049895-4053835	Col0Mockb_dir	dek2_1Mocka_dir	OK	10.1216	11.8362	0.225772	0.838951	0.19375	0.56015	no	AT1G12000	Phosphofructokinase family protein
AT1G12010	AT1G12010	-	1:4056206-4057933	Col0Mockb_dir	dek2_1Mocka_dir	OK	6.49958	5.60704	-0.213109	-0.583018	0.3687	0.717779	no	AT1G12010	2-oxoglutarate (2OG) and Fe(II)-dependent oxygenase superfamily protein
AT1G12020	AT1G12020	-	1:4062461-4063337	Col0Mockb_dir	dek2_1Mocka_dir	OK	12.2835	14.6058	0.249824	0.727531	0.2551	0.623811	no	AT1G12020	hypothetical protein
AT1G12030	AT1G12030	-	1:4064666-4066341	Col0Mockb_dir	dek2_1Mocka_dir	OK	1.03857	1.42834	0.459735	0.686739	0.3089	0.67255	no	AT1G12030	phosphoenolpyruvate carboxylase, putative (DUF506)
AT1G12040	AT1G12040	-	1:4070123-4072567	Col0Mockb_dir	dek2_1Mocka_dir	OK	2.42422	2.88863	0.252864	0.661435	0.34565	0.699404	no	LRX1	leucine-rich repeat/extensin 1
AT1G12050	AT1G12050	-	1:4072751-4076207	Col0Mockb_dir	dek2_1Mocka_dir	OK	1.25289	1.59623	0.349416	0.699272	0.2859	0.654269	no	AT1G12050	fumarylacetoacetase
AT1G12060	AT1G12060	-	1:4076333-4076981	Col0Mockb_dir	dek2_1Mocka_dir	OK	8.8106	6.10448	-0.529373	-1.17692	0.09495	0.414046	no	BAG5	BCL-2-associated athanogene 5
AT1G12064	AT1G12064	-	1:4077497-4078095	Col0Mockb_dir	dek2_1Mocka_dir	NOTEST	0	0.510491	inf	0	1	1	no	AT1G12064	transmembrane protein
AT1G12070	AT1G12070	-	1:4078912-4080106	Col0Mockb_dir	dek2_1Mocka_dir	NOTEST	0	0.10788	inf	0	1	1	no	AT1G12070	Immunoglobulin E-set superfamily protein
AT1G12080	AT1G12080	-	1:4084161-4085045	Col0Mockb_dir	dek2_1Mocka_dir	OK	75.1613	73.8948	-0.0245162	-0.112181	0.8847	0.963208	no	AT1G12080	Vacuolar calcium-binding protein-like protein
AT1G12090	AT1G12090	-	1:4089846-4090725	Col0Mockb_dir	dek2_1Mocka_dir	OK	659.374	670.123	0.0233284	0.0917268	0.89755	0.968105	no	ELP	extensin-like protein
AT1G12100	AT1G12100	-	1:4095245-4095845	Col0Mockb_dir	dek2_1Mocka_dir	OK	1.15748	1.53213	0.404554	0.342566	0.61185	0.861169	no	AT1G12100	Bifunctional inhibitor/lipid-transfer protein/seed storage 2S albumin superfamily protein
AT1G12110	AT1G12110	-	1:4105232-4109545	Col0Mockb_dir	dek2_1Mocka_dir	OK	26.6296	31.7166	0.252211	0.964321	0.1339	0.481871	no	NRT1.1	nitrate transporter 1.1
AT1G12120	AT1G12120	-	1:4114770-4117594	Col0Mockb_dir	dek2_1Mocka_dir	OK	29.0257	23.5852	-0.299446	-1.14747	0.0772	0.37687	no	AT1G12120	hypothetical protein (DUF863)
AT1G12130	AT1G12130	-	1:4118593-4120871	Col0Mockb_dir	dek2_1Mocka_dir	NOTEST	0.0576003	0.059319	0.042418	0	1	1	no	AT1G12130	Flavin-binding monooxygenase family protein
AT1G12140	AT1G12140	-	1:4121368-4125648	Col0Mockb_dir	dek2_1Mocka_dir	OK	11.4858	8.93232	-0.362751	-1.2496	0.05915	0.333877	no	FMO GS-OX5	flavin-monooxygenase glucosinolate S-oxygenase 5
AT1G12150	AT1G12150	-	1:4121368-4125648	Col0Mockb_dir	dek2_1Mocka_dir	OK	1.77567	1.94413	0.130762	0.176505	0.8105	0.939811	no	AT1G12150	weak chloroplast movement under blue light protein (DUF827)
AT1G12160	AT1G12160	-	1:4126065-4128310	Col0Mockb_dir	dek2_1Mocka_dir	OK	2.52492	2.64146	0.065096	0.146748	0.81795	0.94138	no	AT1G12160	Flavin-binding monooxygenase family protein
AT1G12170	AT1G12170	-	1:4128606-4129701	Col0Mockb_dir	dek2_1Mocka_dir	NOTEST	0	0	0	0	1	1	no	AT1G12170	F-box family protein
AT1G12180	AT1G12180	-	1:4130420-4131137	Col0Mockb_dir	dek2_1Mocka_dir	NOTEST	0	0	0	0	1	1	no	AT1G12180	14.7 kDa heat shock-like protein
AT1G12190	AT1G12190	-	1:4132966-4134094	Col0Mockb_dir	dek2_1Mocka_dir	NOTEST	0	0	0	0	1	1	no	AT1G12190	F-box and associated interaction domains-containing protein
AT1G12200	AT1G12200	-	1:4137532-4140028	Col0Mockb_dir	dek2_1Mocka_dir	OK	4.24065	4.61472	0.121956	0.360793	0.5782	0.843488	no	FMO	Flavin-binding monooxygenase family protein
AT1G12210	AT1G12210	-	1:4140947-4143605	Col0Mockb_dir	dek2_1Mocka_dir	OK	1.23297	0.790361	-0.64155	-1.05139	0.1154	0.450947	no	RFL1	RPS5-like 1
AT1G12211	AT1G12211	-	1:4143865-4144114	Col0Mockb_dir	dek2_1Mocka_dir	NOTEST	0	0	0	0	1	1	no	AT1G12211	hypothetical protein
AT1G12220	AT1G12220	-	1:4144571-4147911	Col0Mockb_dir	dek2_1Mocka_dir	OK	1.41984	1.59869	0.171159	0.359838	0.5683	0.83846	no	RPS5	Disease resistance protein (CC-NBS-LRR class) family
AT1G12230	AT1G12230	-	1:4147961-4151056	Col0Mockb_dir	dek2_1Mocka_dir	OK	36.4728	28.6083	-0.350385	-1.39352	0.0338	0.258287	no	AT1G12230	Aldolase superfamily protein
AT1G12240	AT1G12240	-	1:4153651-4157644	Col0Mockb_dir	dek2_1Mocka_dir	OK	27.6508	33.4065	0.272811	1.06516	0.10355	0.430907	no	ATBETAFRUCT4	Glycosyl hydrolases family 32 protein
AT1G12244	AT1G12244	-	1:4157653-4159046	Col0Mockb_dir	dek2_1Mocka_dir	OK	11.9651	9.04314	-0.403941	-1.18337	0.0655	0.349244	no	AT1G12244	Polynucleotidyl transferase, ribonuclease H-like superfamily protein
AT1G12250	AT1G12250	-	1:4159264-4161455	Col0Mockb_dir	dek2_1Mocka_dir	OK	25.7823	24.9642	-0.0465183	-0.178179	0.78805	0.932566	no	AT1G12250	Pentapeptide repeat-containing protein
AT1G12260	AT1G12260	-	1:4162831-4165852	Col0Mockb_dir	dek2_1Mocka_dir	OK	0.766659	0.769565	0.0054587	0.00785458	0.9906	0.996951	no	NAC007	NAC 007
AT1G12270	AT1G12270	-	1:4172074-4174775	Col0Mockb_dir	dek2_1Mocka_dir	OK	4.88678	6.31066	0.368908	1.206	0.0636	0.344657	no	Hop1	stress-inducible protein
AT1G12280	AT1G12280	-	1:4174874-4177559	Col0Mockb_dir	dek2_1Mocka_dir	OK	5.25977	4.40599	-0.255532	-0.768468	0.2431	0.611338	no	SUMM2	LRR and NB-ARC domains-containing disease resistance protein
AT1G12290	AT1G12290	-	1:4178358-4182593	Col0Mockb_dir	dek2_1Mocka_dir	OK	0.862521	1.08102	0.325767	0.618476	0.33505	0.691429	no	AT1G12290	Disease resistance protein (CC-NBS-LRR class) family
AT1G12300	AT1G12300	-	1:4183065-4186124	Col0Mockb_dir	dek2_1Mocka_dir	OK	1.26774	1.49417	0.237084	0.476183	0.464	0.782704	no	AT1G12300	Tetratricopeptide repeat (TPR)-like superfamily protein
AT1G12310	AT1G12310	-	1:4187164-4188056	Col0Mockb_dir	dek2_1Mocka_dir	OK	107.714	95.7682	-0.169588	-0.682321	0.30745	0.671667	no	AT1G12310	Calcium-binding EF-hand family protein
AT1G12320	AT1G12320	-	1:4189354-4190342	Col0Mockb_dir	dek2_1Mocka_dir	OK	9.37675	7.97244	-0.234068	-0.640582	0.33615	0.691908	no	AT1G12320	ankyrin repeat/KH domain protein (DUF1442)
AT1G12330	AT1G12330	-	1:4194657-4196749	Col0Mockb_dir	dek2_1Mocka_dir	OK	9.81966	6.33969	-0.631261	-2.10609	0.00145	0.0414758	yes	AT1G12330	cyclin-dependent kinase-like protein
AT1G12340	AT1G12340	-	1:4197395-4198310	Col0Mockb_dir	dek2_1Mocka_dir	OK	0.311772	0.600408	0.945451	0.653896	0.3527	0.70494	no	AT1G12340	Cornichon family protein
AT1G12350	AT1G12350	-	1:4198412-4200802	Col0Mockb_dir	dek2_1Mocka_dir	OK	14.3178	12.7426	-0.168152	-0.593713	0.3604	0.711585	no	COAB	4-phospho-panto-thenoylcysteine synthetase
AT1G12360	AT1G12360	-	1:4200875-4208951	Col0Mockb_dir	dek2_1Mocka_dir	OK	1.43047	1.42848	-0.00200195	-0.00404808	0.9934	0.997653	no	KEU	Sec1/munc18-like (SM) proteins superfamily
AT1G12370	AT1G12370	-	1:4200875-4208951	Col0Mockb_dir	dek2_1Mocka_dir	OK	3.81855	3.50177	-0.124943	-0.297166	0.64785	0.877474	no	PHR1	photolyase 1
AT1G12380	AT1G12380	-	1:4214261-4217132	Col0Mockb_dir	dek2_1Mocka_dir	OK	4.58058	3.91723	-0.225694	-0.715025	0.2845	0.652788	no	AT1G12380	hypothetical protein
AT1G12390	AT1G12390	-	1:4220099-4221774	Col0Mockb_dir	dek2_1Mocka_dir	OK	4.7747	5.62275	0.235867	0.582943	0.3664	0.715817	no	AT1G12390	Cornichon family protein
AT1G12400	AT1G12400	-	1:4221862-4222837	Col0Mockb_dir	dek2_1Mocka_dir	OK	13.0492	11.4188	-0.192545	-0.499996	0.4679	0.785428	no	AT1G12400	Nucleotide excision repair, TFIIH, subunit TTDA
AT1G12410	AT1G12410	-	1:4223029-4225124	Col0Mockb_dir	dek2_1Mocka_dir	OK	34.0276	32.2894	-0.0756462	-0.288358	0.64955	0.877741	no	CLP2	CLP protease proteolytic subunit 2
AT1G12411	AT1G12411	-	1:4225320-4225482	Col0Mockb_dir	dek2_1Mocka_dir	NOTEST	0	0	0	0	1	1	no	AT1G12411	hypothetical protein
AT1G12420	AT1G12420	-	1:4226361-4229138	Col0Mockb_dir	dek2_1Mocka_dir	OK	4.22211	4.53835	0.104205	0.292391	0.6402	0.875601	no	ACR8	ACT domain repeat 8
AT1G12423	AT1G12423	-	1:4231026-4231146	Col0Mockb_dir	dek2_1Mocka_dir	NOTEST	0	0	0	0	1	1	no
AT1G12430	AT1G12430	-	1:4233872-4238764	Col0Mockb_dir	dek2_1Mocka_dir	OK	3.98033	3.37288	-0.238908	-0.764874	0.22685	0.595328	no	ARK3	armadillo repeat kinesin 3
AT1G12440	AT1G12440	-	1:4241591-4243008	Col0Mockb_dir	dek2_1Mocka_dir	OK	65.4232	56.9716	-0.199558	-0.782233	0.22965	0.597486	no	AT1G12440	A20/AN1-like zinc finger family protein
AT1G12450	AT1G12450	-	1:4244307-4245993	Col0Mockb_dir	dek2_1Mocka_dir	OK	3.57679	5.12055	0.517634	1.18561	0.06825	0.355164	no	AT1G12450	SNARE associated Golgi protein family
AT1G12451	AT1G12451	-	1:4246108-4246291	Col0Mockb_dir	dek2_1Mocka_dir	NOTEST	0	0	0	0	1	1	no
AT1G12460	AT1G12460	-	1:4247248-4250630	Col0Mockb_dir	dek2_1Mocka_dir	OK	5.91451	5.20283	-0.184962	-0.595048	0.3532	0.705586	no	AT1G12460	Leucine-rich repeat protein kinase family protein
AT1G12470	AT1G12470	-	1:4251031-4259300	Col0Mockb_dir	dek2_1Mocka_dir	OK	4.42597	3.88696	-0.187351	-0.619091	0.33175	0.689679	no	AT1G12470	zinc ion binding protein
AT1G12480	AT1G12480	-	1:4251031-4259300	Col0Mockb_dir	dek2_1Mocka_dir	OK	2.10849	1.44204	-0.548096	-0.647359	0.32465	0.684419	no	OZS1	C4-dicarboxylate transporter/malic acid transport protein
AT1G12490	AT1G12490	-	1:4260782-4261869	Col0Mockb_dir	dek2_1Mocka_dir	NOTEST	0.314287	0.0896571	-1.80959	0	1	1	no	AT1G12490	F-box associated ubiquitination effector family protein
AT1G12500	AT1G12500	-	1:4263149-4265044	Col0Mockb_dir	dek2_1Mocka_dir	OK	43.7248	33.8772	-0.368135	-1.49701	0.02925	0.237635	no	AT1G12500	Nucleotide-sugar transporter family protein
AT1G12520	AT1G12520	-	1:4267105-4268926	Col0Mockb_dir	dek2_1Mocka_dir	OK	15.2977	14.9654	-0.0316895	-0.112159	0.85895	0.956326	no	CCS	copper chaperone for SOD1
AT1G12530	AT1G12530	-	1:4268985-4270787	Col0Mockb_dir	dek2_1Mocka_dir	OK	20.0951	17.7198	-0.181478	-0.64693	0.31115	0.674136	no	AT1G12530	hypothetical protein
AT1G12540	AT1G12540	-	1:4272959-4274206	Col0Mockb_dir	dek2_1Mocka_dir	NOTEST	0	0	0	0	1	1	no	AT1G12540	basic helix-loop-helix (bHLH) DNA-binding superfamily protein
AT1G12550	AT1G12550	-	1:4274593-4275981	Col0Mockb_dir	dek2_1Mocka_dir	OK	8.65303	5.22033	-0.729065	-2.03908	0.0044	0.0859185	no	HPR3	D-isomer specific 2-hydroxyacid dehydrogenase family protein
AT1G12560	AT1G12560	-	1:4276518-4277899	Col0Mockb_dir	dek2_1Mocka_dir	OK	5.95021	9.51177	0.676772	1.84036	0.0072	0.115391	no	EXPA7	expansin A7
AT1G12570	AT1G12570	-	1:4277992-4280862	Col0Mockb_dir	dek2_1Mocka_dir	OK	0.917463	0.692155	-0.406556	-0.650957	0.34115	0.696794	no	AT1G12570	Glucose-methanol-choline (GMC) oxidoreductase family protein
AT1G12580	AT1G12580	-	1:4282898-4285829	Col0Mockb_dir	dek2_1Mocka_dir	OK	14.2766	15.9277	0.157883	0.593778	0.35935	0.710891	no	PEPKR1	phosphoenolpyruvate carboxylase-related kinase 1
AT1G12600	AT1G12600	-	1:4286203-4288878	Col0Mockb_dir	dek2_1Mocka_dir	OK	0.637244	0.341689	-0.899164	-0.928047	0.1563	0.510176	no	AT1G12600	UDP-N-acetylglucosamine (UAA) transporter family
AT1G12610	AT1G12610	-	1:4289943-4291017	Col0Mockb_dir	dek2_1Mocka_dir	NOTEST	0.0406384	0	#NAME?	0	1	1	no	DDF1	Integrase-type DNA-binding superfamily protein
AT1G12620	AT1G12620	-	1:4294593-4297084	Col0Mockb_dir	dek2_1Mocka_dir	OK	2.26017	2.12443	-0.0893529	-0.191463	0.7603	0.923968	no	AT1G12620	Pentatricopeptide repeat (PPR) superfamily protein
AT1G12630	AT1G12630	-	1:4298888-4299475	Col0Mockb_dir	dek2_1Mocka_dir	OK	1.14329	0.378402	-1.5952	-1.29164	0.0578	0.330473	no	AT1G12630	Integrase-type DNA-binding superfamily protein
AT1G12640	AT1G12640	-	1:4303311-4305798	Col0Mockb_dir	dek2_1Mocka_dir	OK	12.0871	11.2849	-0.099076	-0.353687	0.5925	0.851671	no	LPLAT1	MBOAT (membrane bound O-acyl transferase) family protein
AT1G12650	AT1G12650	-	1:4305932-4308005	Col0Mockb_dir	dek2_1Mocka_dir	OK	8.06778	9.07749	0.170122	0.520904	0.41095	0.751684	no	AT1G12650	rRNA biogenesis RRP36-like protein
AT1G12660	AT1G12660	-	1:4308942-4309583	Col0Mockb_dir	dek2_1Mocka_dir	NOTEST	0	0	0	0	1	1	no	AT1G12660	thionin-like protein
AT1G12663	AT1G12663	-	1:4310968-4311457	Col0Mockb_dir	dek2_1Mocka_dir	NOTEST	0	0	0	0	1	1	no	AT1G12663	thionin-like protein
AT1G12665	AT1G12665	-	1:4312330-4312935	Col0Mockb_dir	dek2_1Mocka_dir	NOTEST	0	0.0358231	inf	0	1	1	no	AT1G12665	thionin-like protein
AT1G12672	AT1G12672	-	1:4318308-4319090	Col0Mockb_dir	dek2_1Mocka_dir	NOTEST	0	0.327507	inf	0	1	1	no	AT1G12672	thionin-like protein
AT1G12680	AT1G12680	-	1:4319885-4322945	Col0Mockb_dir	dek2_1Mocka_dir	OK	10.9382	9.76415	-0.163802	-0.591269	0.36265	0.713061	no	PEPKR2	phosphoenolpyruvate carboxylase-related kinase 2
AT1G12700	AT1G12700	-	1:4323555-4326333	Col0Mockb_dir	dek2_1Mocka_dir	OK	2.65795	2.00694	-0.405315	-0.913916	0.15135	0.504256	no	RPF1	RNA processing FACTOR
AT1G12710	AT1G12710	-	1:4326738-4328481	Col0Mockb_dir	dek2_1Mocka_dir	OK	3.6752	7.17903	0.965966	2.34744	0.001	0.0319503	yes	PP2-A12	phloem protein 2-A12
AT1G12730	AT1G12730	-	1:4334614-4337844	Col0Mockb_dir	dek2_1Mocka_dir	OK	2.17035	1.64513	-0.399723	-0.863775	0.19435	0.560503	no	AT1G12730	GPI transamidase subunit PIG-U
AT1G12740	AT1G12740	-	1:4342281-4344857	Col0Mockb_dir	dek2_1Mocka_dir	OK	1.94408	3.13709	0.690343	1.52455	0.01825	0.190223	no	CYP87A2	cytochrome P450, family 87, subfamily A, polypeptide 2
AT1G12750	AT1G12750	-	1:4344984-4348328	Col0Mockb_dir	dek2_1Mocka_dir	OK	15.467	11.0813	-0.481068	-1.80936	0.00585	0.102129	no	RBL6	RHOMBOID-like protein 6
AT1G12760	AT1G12760	-	1:4348497-4350867	Col0Mockb_dir	dek2_1Mocka_dir	OK	19.4507	18.6917	-0.0574236	-0.220478	0.7381	0.915262	no	AT1G12760	Zinc finger, C3HC4 type (RING finger) family protein
AT1G12770	AT1G12770	-	1:4351063-4353685	Col0Mockb_dir	dek2_1Mocka_dir	OK	32.0444	28.6183	-0.163134	-0.640355	0.33355	0.690477	no	EMB1586	P-loop containing nucleoside triphosphate hydrolases superfamily protein
AT1G12775	AT1G12775	-	1:4353905-4358328	Col0Mockb_dir	dek2_1Mocka_dir	OK	1.55021	1.48809	-0.059001	-0.0512147	0.92895	0.97816	no	AT1G12775	Pentatricopeptide repeat (PPR) superfamily protein
AT1G12780	AT1G12780	-	1:4353905-4358328	Col0Mockb_dir	dek2_1Mocka_dir	OK	7.41515	8.97182	0.274926	0.753404	0.2362	0.603966	no	UGE1	UDP-D-glucose/UDP-D-galactose 4-epimerase 1
AT1G12790	AT1G12790	-	1:4359150-4361272	Col0Mockb_dir	dek2_1Mocka_dir	OK	1.12028	0.500471	-1.1625	-1.33596	0.05025	0.312195	no	AT1G12790	DNA ligase-like protein
AT1G12800	AT1G12800	-	1:4361550-4365331	Col0Mockb_dir	dek2_1Mocka_dir	OK	12.184	14.5181	0.252866	0.967585	0.13805	0.488603	no	AT1G12800	Nucleic acid-binding, OB-fold-like protein
AT1G12805	AT1G12805	-	1:4366596-4367119	Col0Mockb_dir	dek2_1Mocka_dir	NOTEST	0	0.0521777	inf	0	1	1	no	AT1G12805	nucleotide binding protein
AT1G12810	AT1G12810	-	1:4367255-4371293	Col0Mockb_dir	dek2_1Mocka_dir	OK	15.1514	16.3247	0.107606	0.187175	0.78605	0.93178	no	AT1G12810	proline-rich family protein
AT1G12820	AT1G12820	-	1:4367255-4371293	Col0Mockb_dir	dek2_1Mocka_dir	OK	33.5037	25.429	-0.397847	-1.38845	0.0351	0.262782	no	AFB3	auxin signaling F-box 3
AT1G12830	AT1G12830	-	1:4374249-4375170	Col0Mockb_dir	dek2_1Mocka_dir	OK	20.4353	21.224	0.0546362	0.201026	0.77985	0.929412	no	AT1G12830	nucleolin
AT1G12840	AT1G12840	-	1:4375514-4378514	Col0Mockb_dir	dek2_1Mocka_dir	OK	30.1986	29.6749	-0.0252393	-0.0968958	0.8778	0.960325	no	DET3	vacuolar ATP synthase subunit C (VATC) / V-ATPase C subunit / vacuolar proton pump C subunit (DET3)
AT1G12845	AT1G12845	-	1:4378938-4379516	Col0Mockb_dir	dek2_1Mocka_dir	OK	15.2844	17.9187	0.229413	0.554367	0.39095	0.736037	no	AT1G12845	transmembrane protein
AT1G12850	AT1G12850	-	1:4379706-4381612	Col0Mockb_dir	dek2_1Mocka_dir	OK	28.0152	21.8842	-0.356319	-1.38921	0.0358	0.264939	no	AT1G12850	Phosphoglycerate mutase family protein
AT1G12855	AT1G12855	-	1:4382159-4383611	Col0Mockb_dir	dek2_1Mocka_dir	NOTEST	0	0.121213	inf	0	1	1	no	AT1G12855	F-box family protein
AT1G12860	AT1G12860	-	1:4384352-4386610	Col0Mockb_dir	dek2_1Mocka_dir	OK	16.9097	16.048	-0.0754593	-0.276466	0.6674	0.885352	no	SCRM2	basic helix-loop-helix (bHLH) DNA-binding superfamily protein
AT1G12870	AT1G12870	-	1:4387128-4389110	Col0Mockb_dir	dek2_1Mocka_dir	NOTEST	0	0	0	0	1	1	no	AT1G12870	F-box and associated interaction domains-containing protein
AT1G12880	AT1G12880	-	1:4389750-4391151	Col0Mockb_dir	dek2_1Mocka_dir	OK	11.8698	4.16375	-1.51134	-3.5819	5e-05	0.00323653	yes	NUDT12	nudix hydrolase homolog 12
AT1G12890	AT1G12890	-	1:4391733-4392393	Col0Mockb_dir	dek2_1Mocka_dir	NOTEST	0.12915	0.251005	0.958668	0	1	1	no	AT1G12890	Integrase-type DNA-binding superfamily protein
AT1G12900	AT1G12900	-	1:4392449-4394400	Col0Mockb_dir	dek2_1Mocka_dir	OK	1227.93	1103.04	-0.154742	-0.490261	0.45295	0.776213	no	GAPA-2	glyceraldehyde 3-phosphate dehydrogenase A subunit 2
AT1G12910	AT1G12910	-	1:4394896-4396291	Col0Mockb_dir	dek2_1Mocka_dir	OK	21.3709	20.7015	-0.0459118	-0.164561	0.80515	0.937373	no	ATAN11	Transducin/WD40 repeat-like superfamily protein
AT1G12920	AT1G12920	-	1:4396347-4398193	Col0Mockb_dir	dek2_1Mocka_dir	OK	64.0793	68.2992	0.0920117	0.354432	0.57615	0.842763	no	ERF1-2	eukaryotic release factor 1-2
AT1G12930	AT1G12930	-	1:4398374-4405605	Col0Mockb_dir	dek2_1Mocka_dir	OK	2.68724	2.11984	-0.342172	-1.0619	0.1057	0.434145	no	AT1G12930	ARM repeat superfamily protein
AT1G12938	AT1G12938	-	1:4412886-4413057	Col0Mockb_dir	dek2_1Mocka_dir	NOTEST	0	0	0	0	1	1	no
AT1G12940	AT1G12940	-	1:4416404-4418590	Col0Mockb_dir	dek2_1Mocka_dir	NOTEST	0	0.0101847	inf	0	1	1	no	NRT2.5	nitrate transporter2.5
AT1G12950	AT1G12950	-	1:4419769-4422638	Col0Mockb_dir	dek2_1Mocka_dir	OK	0.454347	0.94088	1.05022	1.39036	0.03105	0.245652	no	RSH2	root hair specific 2
AT1G12960	AT1G12960	-	1:4422706-4423155	Col0Mockb_dir	dek2_1Mocka_dir	NOTEST	0	0	0	0	1	1	no	AT1G12960	Ribosomal protein L18e/L15 superfamily protein
AT1G12970	AT1G12970	-	1:4423639-4425789	Col0Mockb_dir	dek2_1Mocka_dir	OK	6.48406	4.73992	-0.452037	-1.32136	0.04015	0.283008	no	PIRL3	plant intracellular ras group-related LRR 3
AT1G12980	AT1G12980	-	1:4429717-4430965	Col0Mockb_dir	dek2_1Mocka_dir	NOTEST	0	0.00686432	inf	0	1	1	no	ESR1	Integrase-type DNA-binding superfamily protein
AT1G12990	AT1G12990	-	1:4433639-4436075	Col0Mockb_dir	dek2_1Mocka_dir	OK	11.8377	9.83763	-0.267005	-0.921877	0.155	0.507842	no	AT1G12990	beta-1,4-N-acetylglucosaminyltransferase family protein
AT1G13000	AT1G13000	-	1:4436104-4439476	Col0Mockb_dir	dek2_1Mocka_dir	OK	4.04762	3.12212	-0.374549	-1.03796	0.11125	0.44351	no	AT1G13000	transmembrane protein, putative (DUF707)
AT1G13020	AT1G13020	-	1:4440543-4443684	Col0Mockb_dir	dek2_1Mocka_dir	OK	11.2071	10.2537	-0.128276	-0.491372	0.4606	0.780751	no	EIF4B2	eukaryotic initiation factor 4B2
AT1G13030	AT1G13030	-	1:4444042-4447406	Col0Mockb_dir	dek2_1Mocka_dir	OK	1.68066	1.97609	0.233624	0.532275	0.39605	0.74037	no	AT1G13030	sphere organelles protein-like protein
AT1G13040	AT1G13040	-	1:4447646-4449200	Col0Mockb_dir	dek2_1Mocka_dir	OK	0.497683	0.733678	0.559919	0.568349	0.4019	0.745276	no	AT1G13040	Pentatricopeptide repeat (PPR-like) superfamily protein
AT1G13050	AT1G13050	-	1:4450237-4451742	Col0Mockb_dir	dek2_1Mocka_dir	OK	8.70612	4.52655	-0.943619	-2.60387	0.0001	0.00586382	yes	AT1G13050	proline-rich receptor-like kinase
AT1G13060	AT1G13060	-	1:4452211-4454876	Col0Mockb_dir	dek2_1Mocka_dir	OK	40.277	38.3615	-0.0703	-0.273382	0.6747	0.88736	no	PBE1	20S proteasome beta subunit E1
AT1G13080	AT1G13080	-	1:4459165-4460940	Col0Mockb_dir	dek2_1Mocka_dir	OK	19.9546	18.8817	-0.0797329	-0.291744	0.65155	0.878531	no	CYP71B2	cytochrome P450, family 71, subfamily B, polypeptide 2
AT1G13090	AT1G13090	-	1:4461805-4463543	Col0Mockb_dir	dek2_1Mocka_dir	OK	38.3759	31.9542	-0.264194	-1.05491	0.1134	0.446898	no	CYP71B28	cytochrome P450, family 71, subfamily B, polypeptide 28
AT1G13100	AT1G13100	-	1:4463923-4465538	Col0Mockb_dir	dek2_1Mocka_dir	OK	6.05969	5.11573	-0.244304	-0.665291	0.3108	0.673817	no	CYP71B29	cytochrome P450, family 71, subfamily B, polypeptide 29
AT1G13110	AT1G13110	-	1:4467219-4469033	Col0Mockb_dir	dek2_1Mocka_dir	OK	36.071	35.7026	-0.0148099	-0.0587583	0.92985	0.978333	no	CYP71B7	cytochrome P450, family 71 subfamily B, polypeptide 7
AT1G13120	AT1G13120	-	1:4469180-4473213	Col0Mockb_dir	dek2_1Mocka_dir	OK	4.26019	4.93272	0.211466	0.684298	0.287	0.655432	no	GLE1	nucleoporin GLE1-like protein
AT1G13130	AT1G13130	-	1:4474719-4477941	Col0Mockb_dir	dek2_1Mocka_dir	NOTEST	0.163114	0.388325	1.25138	0	1	1	no	AT1G13130	Cellulase (glycosyl hydrolase family 5) protein
AT1G13140	AT1G13140	-	1:4478490-4480327	Col0Mockb_dir	dek2_1Mocka_dir	OK	1.69582	1.04757	-0.694935	-1.10113	0.0844	0.393108	no	CYP86C3	cytochrome P450, family 86, subfamily C, polypeptide 3
AT1G13150	AT1G13150	-	1:4481874-4483696	Col0Mockb_dir	dek2_1Mocka_dir	OK	1.23824	1.05666	-0.228782	-0.339707	0.5952	0.852417	no	CYP86C4	cytochrome P450, family 86, subfamily C, polypeptide 4
AT1G13160	AT1G13160	-	1:4484583-4492587	Col0Mockb_dir	dek2_1Mocka_dir	OK	5.43893	5.74186	0.0781955	0.184003	0.77285	0.927764	no	AT1G13160	ARM repeat superfamily protein
AT1G13170	AT1G13170	-	1:4484583-4492587	Col0Mockb_dir	dek2_1Mocka_dir	OK	4.59602	3.67494	-0.322665	-0.667312	0.3107	0.673817	no	ORP1D	OSBP(oxysterol binding protein)-related protein 1D
AT1G13180	AT1G13180	-	1:4495027-4498469	Col0Mockb_dir	dek2_1Mocka_dir	OK	1.22811	1.78708	0.541164	1.08654	0.09205	0.407251	no	DIS1	Actin-like ATPase superfamily protein
AT1G13190	AT1G13190	-	1:4498880-4503591	Col0Mockb_dir	dek2_1Mocka_dir	OK	13.3043	12.0943	-0.137562	-0.481772	0.4602	0.780593	no	AT1G13190	RNA-binding (RRM/RBD/RNP motifs) family protein
AT1G13195	AT1G13195	-	1:4498880-4503591	Col0Mockb_dir	dek2_1Mocka_dir	OK	4.33255	4.60499	0.0879816	0.124725	0.84695	0.952323	no	AT1G13195	RING/U-box superfamily protein
AT1G13200	AT1G13200	-	1:4507220-4508528	Col0Mockb_dir	dek2_1Mocka_dir	NOTEST	0	0.210604	inf	0	1	1	no	AT1G13200	F-box and associated interaction domains-containing protein
AT1G13210	AT1G13210	-	1:4508962-4513938	Col0Mockb_dir	dek2_1Mocka_dir	OK	2.83765	3.74727	0.401145	1.24955	0.05165	0.315389	no	ACA.l	autoinhibited Ca2 /ATPase II
AT1G13220	AT1G13220	-	1:4515605-4520284	Col0Mockb_dir	dek2_1Mocka_dir	OK	6.18684	6.02185	-0.0389953	-0.144183	0.8273	0.945425	no	LINC2	nuclear matrix constituent protein-like protein
AT1G13230	AT1G13230	-	1:4520630-4522544	Col0Mockb_dir	dek2_1Mocka_dir	OK	0.790144	0.247532	-1.6745	-1.52676	0.03475	0.261734	no	AT1G13230	Leucine-rich repeat (LRR) family protein
AT1G13245	AT1G13245	-	1:4525485-4526064	Col0Mockb_dir	dek2_1Mocka_dir	OK	188.788	195.415	0.0497758	0.194178	0.7657	0.925017	no	RTFL17	ROTUNDIFOLIA like 17
AT1G13250	AT1G13250	-	1:4528622-4530063	Col0Mockb_dir	dek2_1Mocka_dir	OK	26.3178	18.046	-0.544363	-2.18813	0.0023	0.0564718	no	GATL3	galacturonosyltransferase-like 3
AT1G13260	AT1G13260	-	1:4542167-4543742	Col0Mockb_dir	dek2_1Mocka_dir	OK	16.0985	35.6427	1.14668	4.35236	5e-05	0.00323653	yes	RAV1	related to ABI3/VP1 1
AT1G13270	AT1G13270	-	1:4544952-4547312	Col0Mockb_dir	dek2_1Mocka_dir	OK	10.3144	8.57766	-0.266011	-0.870816	0.1812	0.543655	no	MAP1C	methionine aminopeptidase 1B
AT1G13280	AT1G13280	-	1:4547453-4548875	Col0Mockb_dir	dek2_1Mocka_dir	OK	26.5456	26.3345	-0.0115221	-0.0425488	0.9488	0.985117	no	AOC4	allene oxide cyclase 4
AT1G13290	AT1G13290	-	1:4550152-4551620	Col0Mockb_dir	dek2_1Mocka_dir	NOTEST	0	0.00634863	inf	0	1	1	no	DOT5	C2H2-like zinc finger protein
AT1G13300	AT1G13300	-	1:4556891-4558708	Col0Mockb_dir	dek2_1Mocka_dir	OK	9.34145	9.66591	0.0492591	0.17059	0.8069	0.938301	no	HRS1	myb-like transcription factor family protein
AT1G13310	AT1G13310	-	1:4561067-4563061	Col0Mockb_dir	dek2_1Mocka_dir	NOTEST	0.0487798	0.0678003	0.475009	0	1	1	no	AT1G13310	Endosomal targeting BRO1-like domain-containing protein
AT1G13320	AT1G13320	-	1:4563470-4567807	Col0Mockb_dir	dek2_1Mocka_dir	OK	6.29269	5.53769	-0.184391	-0.630743	0.33255	0.690199	no	PP2AA3	protein phosphatase 2A subunit A3
AT1G13330	AT1G13330	-	1:4567934-4571118	Col0Mockb_dir	dek2_1Mocka_dir	NOTEST	0.222888	0.20293	-0.135338	0	1	1	no	AHP2	Tat-binding protein 1(Tbp-1)-interacting protein (TBPIP)
AT1G13340	AT1G13340	-	1:4567934-4571118	Col0Mockb_dir	dek2_1Mocka_dir	OK	4.8551	4.283	-0.180879	-0.450142	0.4829	0.794486	no	AT1G13340	Regulator of Vps4 activity in the MVB pathway protein
AT1G13350	AT1G13350	-	1:4572418-4576632	Col0Mockb_dir	dek2_1Mocka_dir	OK	6.26247	7.46762	0.253918	0.90164	0.1602	0.516312	no	AT1G13350	Protein kinase superfamily protein
AT1G13360	AT1G13360	-	1:4576872-4577967	Col0Mockb_dir	dek2_1Mocka_dir	OK	48.7825	37.454	-0.381244	-1.50892	0.02895	0.236548	no	AT1G13360	hypothetical protein
AT1G13370	AT1G13370	-	1:4587779-4588613	Col0Mockb_dir	dek2_1Mocka_dir	OK	0.841586	0.212273	-1.98719	-1.32194	0.0717	0.363158	no	AT1G13370	Histone superfamily protein
AT1G13380	AT1G13380	-	1:4589070-4590423	Col0Mockb_dir	dek2_1Mocka_dir	OK	14.2248	18.9927	0.417037	1.35958	0.0436	0.294862	no	AT1G13380	sodium/hydrogen exchanger (DUF1218)
AT1G13390	AT1G13390	-	1:4592480-4594391	Col0Mockb_dir	dek2_1Mocka_dir	OK	21.2371	22.9223	0.11017	0.405629	0.5255	0.818058	no	AT1G13390	translocase subunit seca
AT1G13400	AT1G13400	-	1:4597626-4598911	Col0Mockb_dir	dek2_1Mocka_dir	OK	0.706793	0.172433	-2.03525	-1.52538	0.066	0.350331	no	NUB	C2H2 and C2HC zinc fingers superfamily protein
AT1G13410	AT1G13410	-	1:4601260-4603298	Col0Mockb_dir	dek2_1Mocka_dir	OK	0.855502	1.08839	0.347357	0.478849	0.44315	0.771488	no	AT1G13410	Tetratricopeptide repeat (TPR)-like superfamily protein
AT1G13420	AT1G13420	-	1:4604840-4606053	Col0Mockb_dir	dek2_1Mocka_dir	OK	12.9896	14.5271	0.161386	0.53838	0.438	0.768976	no	ST4B	sulfotransferase 4B
AT1G13430	AT1G13430	-	1:4606499-4607747	Col0Mockb_dir	dek2_1Mocka_dir	OK	0.245237	0.642459	1.38942	1.03183	0.14115	0.492407	no	ST4C	sulfotransferase 4C
AT1G13440	AT1G13440	-	1:4608195-4610647	Col0Mockb_dir	dek2_1Mocka_dir	OK	633.654	512.099	-0.307271	-1.0232	0.11375	0.447569	no	GAPC2	glyceraldehyde-3-phosphate dehydrogenase C2
AT1G13450	AT1G13450	-	1:4612730-4615353	Col0Mockb_dir	dek2_1Mocka_dir	OK	12.8391	10.6809	-0.265519	-0.93529	0.14665	0.498595	no	GT-1	Homeodomain-like superfamily protein
AT1G13460	AT1G13460	-	1:4615812-4618329	Col0Mockb_dir	dek2_1Mocka_dir	OK	11.3798	7.4036	-0.620178	-2.04268	0.00185	0.0480879	yes	AT1G13460	Protein phosphatase 2A regulatory B subunit family protein
AT1G13470	AT1G13470	-	1:4620227-4621580	Col0Mockb_dir	dek2_1Mocka_dir	NOTEST	0.236299	0.147613	-0.678795	0	1	1	no	AT1G13470	hypothetical protein (DUF1262)
AT1G13480	AT1G13480	-	1:4622633-4624070	Col0Mockb_dir	dek2_1Mocka_dir	OK	1.20506	1.13508	-0.0863186	-0.120537	0.8652	0.958145	no	AT1G13480	hypothetical protein (DUF1262)
AT1G13485	AT1G13485	-	1:4624170-4624344	Col0Mockb_dir	dek2_1Mocka_dir	NOTEST	0	0	0	0	1	1	no	AT1G13485	hypothetical protein
AT1G13490	AT1G13490	-	1:4624714-4626064	Col0Mockb_dir	dek2_1Mocka_dir	NOTEST	0	0.017428	inf	0	1	1	no	AT1G13490	hypothetical protein (DUF1262)
AT1G13500	AT1G13500	-	1:4627788-4629169	Col0Mockb_dir	dek2_1Mocka_dir	OK	1.50986	1.82881	0.276495	0.412509	0.5039	0.806216	no	AT1G13500	hypothetical protein (DUF1262)
AT1G13510	AT1G13510	-	1:4629202-4630821	Col0Mockb_dir	dek2_1Mocka_dir	OK	1.3815	1.65586	0.261348	0.407594	0.5113	0.81096	no	AT1G13510	hypothetical protein (DUF1262)
AT1G13520	AT1G13520	-	1:4631777-4633248	Col0Mockb_dir	dek2_1Mocka_dir	OK	1.91912	2.46746	0.362581	0.640927	0.3024	0.667658	no	AT1G13520	hypothetical protein (DUF1262)
AT1G13530	AT1G13530	-	1:4633739-4635129	Col0Mockb_dir	dek2_1Mocka_dir	OK	0.738951	2.20184	1.57516	1.97874	0.00585	0.102129	no	AT1G13530	hypothetical protein (DUF1262)
AT1G13540	AT1G13540	-	1:4635462-4636805	Col0Mockb_dir	dek2_1Mocka_dir	OK	0.373238	0.772222	1.04892	0.995847	0.16065	0.516903	no	AT1G13540	hypothetical protein (DUF1262)
AT1G13550	AT1G13550	-	1:4636983-4638330	Col0Mockb_dir	dek2_1Mocka_dir	NOTEST	0.335155	0.329873	-0.0229178	0	1	1	no	AT1G13550	hypothetical protein (DUF1262)
AT1G13560	AT1G13560	-	1:4638513-4642104	Col0Mockb_dir	dek2_1Mocka_dir	OK	4.47982	4.89529	0.127953	0.39231	0.54305	0.826259	no	AAPT1	aminoalcoholphosphotransferase 1
AT1G13570	AT1G13570	-	1:4642345-4644422	Col0Mockb_dir	dek2_1Mocka_dir	OK	14.1375	10.3594	-0.448592	-1.51825	0.02005	0.197796	no	AT1G13570	F-box/RNI-like superfamily protein
AT1G13580	AT1G13580	-	1:4644520-4647007	Col0Mockb_dir	dek2_1Mocka_dir	OK	6.8223	6.7525	-0.0148364	-0.0441696	0.94405	0.983669	no	LAG13	LAG1 longevity assurance-like protein
AT1G13590	AT1G13590	-	1:4647948-4648740	Col0Mockb_dir	dek2_1Mocka_dir	OK	7.54239	8.74711	0.213786	0.42082	0.5241	0.817347	no	PSK1	phytosulfokine 1 precursor
AT1G13600	AT1G13600	-	1:4650786-4651469	Col0Mockb_dir	dek2_1Mocka_dir	OK	1.98334	2.40887	0.28042	0.327653	0.60435	0.856782	no	bZIP58	basic leucine-zipper 58
AT1G13605	AT1G13605	-	1:4658537-4659106	Col0Mockb_dir	dek2_1Mocka_dir	NOTEST	0	0	0	0	1	1	no	AT1G13605	defensin-like protein
AT1G13607	AT1G13607	-	1:4660777-4661218	Col0Mockb_dir	dek2_1Mocka_dir	NOTEST	0.974364	0.372688	-1.38649	0	1	1	no	AT1G13607	Defensin-like (DEFL) family protein
AT1G13608	AT1G13608	-	1:4661681-4662029	Col0Mockb_dir	dek2_1Mocka_dir	NOTEST	0.228762	0.360248	0.655143	0	1	1	no	AT1G13608	Defensin-like (DEFL) family protein
AT1G13609	AT1G13609	-	1:4662720-4663219	Col0Mockb_dir	dek2_1Mocka_dir	OK	15.7367	19.381	0.300515	0.636248	0.31875	0.679889	no	AT1G13609	Defensin-like (DEFL) family protein
AT1G13610	AT1G13610	-	1:4663830-4666031	Col0Mockb_dir	dek2_1Mocka_dir	OK	0.763123	1.05551	0.467957	0.627314	0.3349	0.691365	no	AT1G13610	alpha/beta-Hydrolases superfamily protein
AT1G13620	AT1G13620	-	1:4668442-4669471	Col0Mockb_dir	dek2_1Mocka_dir	OK	1.55881	2.07627	0.413546	0.51146	0.4373	0.768748	no	RGF2	root meristem growth factor-like protein
AT1G13630	AT1G13630	-	1:4669783-4672957	Col0Mockb_dir	dek2_1Mocka_dir	NOTEST	0.10757	0.410981	1.93379	0	1	1	no	AT1G13630	Tetratricopeptide repeat (TPR)-like superfamily protein
AT1G13635	AT1G13635	-	1:4674151-4676170	Col0Mockb_dir	dek2_1Mocka_dir	OK	0.343888	0.834356	1.27872	1.26018	0.0575	0.329324	no	AT1G13635	DNA glycosylase superfamily protein
AT1G13640	AT1G13640	-	1:4677026-4679812	Col0Mockb_dir	dek2_1Mocka_dir	OK	15.4133	14.6134	-0.0768821	-0.296576	0.64715	0.877317	no	AT1G13640	Phosphatidylinositol 3- and 4-kinase family protein
AT1G13650	AT1G13650	-	1:4680431-4682196	Col0Mockb_dir	dek2_1Mocka_dir	OK	145.901	81.117	-0.84691	-3.28767	5e-05	0.00323653	yes	AT1G13650	hypothetical protein
AT1G13670	AT1G13670	-	1:4688155-4688966	Col0Mockb_dir	dek2_1Mocka_dir	OK	14.1164	12.6153	-0.162201	-0.543217	0.4698	0.787159	no	AT1G13670	hypothetical protein
AT1G13680	AT1G13680	-	1:4690408-4692841	Col0Mockb_dir	dek2_1Mocka_dir	NOTEST	0	0.00624527	inf	0	1	1	no	AT1G13680	PLC-like phosphodiesterases superfamily protein
AT1G13690	AT1G13690	-	1:4693288-4696023	Col0Mockb_dir	dek2_1Mocka_dir	OK	15.7058	16.2187	0.0463649	0.127441	0.84335	0.951549	no	ATE1	ATPase E1
AT1G13700	AT1G13700	-	1:4693288-4696023	Col0Mockb_dir	dek2_1Mocka_dir	OK	5.44823	9.16142	0.749784	1.39375	0.03625	0.267376	no	PGL1	6-phosphogluconolactonase 1
AT1G13710	AT1G13710	-	1:4702724-4704657	Col0Mockb_dir	dek2_1Mocka_dir	OK	2.27354	1.32193	-0.782292	-1.42347	0.02735	0.22959	no	CYP78A5	cytochrome P450, family 78, subfamily A, polypeptide 5
AT1G13730	AT1G13730	-	1:4709823-4712550	Col0Mockb_dir	dek2_1Mocka_dir	OK	17.7982	16.7035	-0.0915778	-0.342646	0.59135	0.850775	no	AT1G13730	Nuclear transport factor 2 (NTF2) family protein with RNA binding (RRM-RBD-RNP motifs) domain-containing protein
AT1G13740	AT1G13740	-	1:4713673-4718235	Col0Mockb_dir	dek2_1Mocka_dir	OK	3.90698	4.43565	0.183094	0.417435	0.53935	0.824998	no	AFP2	ABI five binding protein 2
AT1G13750	AT1G13750	-	1:4713673-4718235	Col0Mockb_dir	dek2_1Mocka_dir	OK	1.19138	2.51152	1.07593	1.51909	0.03055	0.243241	no	AT1G13750	Purple acid phosphatases superfamily protein
AT1G13755	AT1G13755	-	1:4718672-4719354	Col0Mockb_dir	dek2_1Mocka_dir	NOTEST	0	0	0	0	1	1	no	AT1G13755	Defensin-like (DEFL) family protein
AT1G13760	AT1G13760	-	1:4720242-4721342	Col0Mockb_dir	dek2_1Mocka_dir	NOTEST	0	0	0	0	1	1	no	AT1G13760	hypothetical protein
AT1G13770	AT1G13770	-	1:4721694-4724510	Col0Mockb_dir	dek2_1Mocka_dir	OK	3.73697	2.80006	-0.416412	-1.04862	0.1095	0.440942	no	RUS3	root UVB sensitive protein (Protein of unknown function, DUF647)
AT1G13780	AT1G13780	-	1:4724607-4726499	Col0Mockb_dir	dek2_1Mocka_dir	OK	3.91885	3.78172	-0.0513895	-0.118202	0.85775	0.956162	no	AT1G13780	F-box/RNI-like/FBD-like domains-containing protein
AT1G13790	AT1G13790	-	1:4727437-4730425	Col0Mockb_dir	dek2_1Mocka_dir	OK	1.23675	1.19045	-0.0550505	-0.110867	0.87075	0.959648	no	FDM4	XH/XS domain-containing protein
AT1G13800	AT1G13800	-	1:4731055-4733707	Col0Mockb_dir	dek2_1Mocka_dir	NOTEST	0.23904	0.294114	0.299122	0	1	1	no	FAC19	Tetratricopeptide repeat (TPR)-like superfamily protein
AT1G13810	AT1G13810	-	1:4734035-4735389	Col0Mockb_dir	dek2_1Mocka_dir	OK	5.32056	5.7061	0.100927	0.243128	0.7073	0.902088	no	AT1G13810	Restriction endonuclease, type II-like superfamily protein
AT1G13820	AT1G13820	-	1:4735546-4737808	Col0Mockb_dir	dek2_1Mocka_dir	OK	22.6541	16.5622	-0.451874	-1.66963	0.0095	0.134614	no	AT1G13820	alpha/beta-Hydrolases superfamily protein
AT1G13830	AT1G13830	-	1:4739872-4741038	Col0Mockb_dir	dek2_1Mocka_dir	OK	5.73598	5.98137	0.0604367	0.134466	0.8349	0.94878	no	AT1G13830	Carbohydrate-binding X8 domain superfamily protein
AT1G13860	AT1G13860	-	1:4743204-4746956	Col0Mockb_dir	dek2_1Mocka_dir	OK	3.01434	3.32423	0.14118	0.391384	0.53575	0.823017	no	QUL1	QUASIMODO2 LIKE 1
AT1G13870	AT1G13870	-	1:4747264-4748642	Col0Mockb_dir	dek2_1Mocka_dir	OK	17.6216	18.3242	0.0564107	0.191199	0.766	0.925017	no	DRL1	KTI12-like, chromatin associated protein
AT1G13880	AT1G13880	-	1:4748872-4751212	Col0Mockb_dir	dek2_1Mocka_dir	OK	12.3315	12.189	-0.0167653	-0.0591164	0.9271	0.977975	no	AT1G13880	ELM2 domain-containing protein
AT1G13890	AT1G13890	-	1:4751580-4752844	Col0Mockb_dir	dek2_1Mocka_dir	NOTEST	0	0.00722863	inf	0	1	1	no	SNAP30	soluble N-ethylmaleimide-sensitive factor adaptor protein 30
AT1G13900	AT1G13900	-	1:4753144-4755580	Col0Mockb_dir	dek2_1Mocka_dir	OK	11.2642	11.7044	0.0553167	0.195856	0.7661	0.925017	no	PAP2	Purple acid phosphatases superfamily protein
AT1G13910	AT1G13910	-	1:4755783-4757991	Col0Mockb_dir	dek2_1Mocka_dir	OK	0.895312	1.48061	0.725725	1.07002	0.1168	0.453219	no	AT1G13910	Leucine-rich repeat (LRR) family protein
AT1G13920	AT1G13920	-	1:4758187-4759754	Col0Mockb_dir	dek2_1Mocka_dir	OK	1.86415	1.92422	0.0457542	0.079498	0.90595	0.970448	no	AT1G13920	Remorin family protein
AT1G13930	AT1G13930	-	1:4761011-4762666	Col0Mockb_dir	dek2_1Mocka_dir	OK	237.013	249.641	0.0748914	0.280648	0.6712	0.886851	no	AT1G13930	oleosin-B3-like protein
AT1G13940	AT1G13940	-	1:4762702-4766749	Col0Mockb_dir	dek2_1Mocka_dir	OK	4.19156	3.8209	-0.133577	-0.421651	0.51105	0.810694	no	AT1G13940	T-box transcription factor, putative (DUF863)
AT1G13950	AT1G13950	-	1:4773575-4774867	Col0Mockb_dir	dek2_1Mocka_dir	OK	11.8403	14.1266	0.254714	0.755946	0.24135	0.609235	no	ELF5A-1	eukaryotic elongation factor 5A-1
AT1G13960	AT1G13960	-	1:4776462-4779400	Col0Mockb_dir	dek2_1Mocka_dir	OK	4.55842	5.23321	0.199162	0.618567	0.3306	0.688373	no	WRKY4	WRKY DNA-binding protein 4
AT1G13970	AT1G13970	-	1:4779522-4782542	Col0Mockb_dir	dek2_1Mocka_dir	OK	1.77629	1.54377	-0.202415	-0.40266	0.5463	0.827691	no	AT1G13970	beta-hexosaminidase (DUF1336)
AT1G13980	AT1G13980	-	1:4788462-4794654	Col0Mockb_dir	dek2_1Mocka_dir	OK	7.44886	7.0098	-0.0876471	-0.329052	0.6089	0.859018	no	GN	sec7 domain-containing protein
AT1G13990	AT1G13990	-	1:4794755-4796597	Col0Mockb_dir	dek2_1Mocka_dir	OK	5.15526	6.81733	0.403162	1.12832	0.08005	0.383551	no	AT1G13990	plant/protein
AT1G14000	AT1G14000	-	1:4797357-4801850	Col0Mockb_dir	dek2_1Mocka_dir	OK	9.95428	8.03427	-0.309149	-0.745635	0.24045	0.607663	no	VIK	VH1-interacting kinase
AT1G14010	AT1G14010	-	1:4797357-4801850	Col0Mockb_dir	dek2_1Mocka_dir	OK	10.6827	13.7538	0.36455	0.802004	0.21155	0.579523	no	AT1G14010	emp24/gp25L/p24 family/GOLD family protein
AT1G14020	AT1G14020	-	1:4802719-4807517	Col0Mockb_dir	dek2_1Mocka_dir	OK	7.83138	7.17708	-0.12587	-0.22838	0.72345	0.909088	no	AT1G14020	O-fucosyltransferase family protein
AT1G14030	AT1G14030	-	1:4802719-4807517	Col0Mockb_dir	dek2_1Mocka_dir	OK	34.6733	24.4902	-0.501621	-1.6936	0.0081	0.123181	no	LSMT-L	Rubisco methyltransferase family protein
AT1G14040	AT1G14040	-	1:4810487-4814543	Col0Mockb_dir	dek2_1Mocka_dir	OK	0.45978	0.517748	0.171306	0.247459	0.69505	0.896907	no	AT1G14040	EXS (ERD1/XPR1/SYG1) family protein
AT1G14048	AT1G14048	-	1:4815682-4815988	Col0Mockb_dir	dek2_1Mocka_dir	NOTEST	0	0	0	0	1	1	no	AT1G14048	GCK domain-containing protein
AT1G14060	AT1G14060	-	1:4817143-4818020	Col0Mockb_dir	dek2_1Mocka_dir	OK	22.4763	22.6508	0.0111559	0.0433629	0.95365	0.986454	no	AT1G14060	GCK domain-containing protein
AT1G14070	AT1G14070	-	1:4818547-4820150	Col0Mockb_dir	dek2_1Mocka_dir	OK	5.52382	4.57412	-0.272172	-0.669003	0.2998	0.665676	no
AT1G14080	AT1G14080	-	1:4822527-4824414	Col0Mockb_dir	dek2_1Mocka_dir	OK	3.86536	3.64719	-0.0838167	-0.201414	0.7575	0.923291	no	FUT6	fucosyltransferase 6
AT1G14100	AT1G14100	-	1:4827960-4829587	Col0Mockb_dir	dek2_1Mocka_dir	NOTEST	0.0971695	0.0520622	-0.900268	0	1	1	no	FUT8	fucosyltransferase 8
AT1G14110	AT1G14110	-	1:4830296-4831915	Col0Mockb_dir	dek2_1Mocka_dir	NOTEST	0	0	0	0	1	1	no	FUT9	fucosyltransferase 9
AT1G14120	AT1G14120	-	1:4833517-4835089	Col0Mockb_dir	dek2_1Mocka_dir	OK	29.4283	31.446	0.0956721	0.355607	0.5829	0.84623	no	AT1G14120	2-oxoglutarate (2OG) and Fe(II)-dependent oxygenase superfamily protein
AT1G14130	AT1G14130	-	1:4835723-4837616	Col0Mockb_dir	dek2_1Mocka_dir	OK	7.86532	9.26557	0.236375	0.716699	0.2631	0.632023	no	AT1G14130	2-oxoglutarate (2OG) and Fe(II)-dependent oxygenase superfamily protein
AT1G14140	AT1G14140	-	1:4837926-4839633	Col0Mockb_dir	dek2_1Mocka_dir	OK	11.3153	10.8983	-0.0541789	-0.175704	0.7834	0.931011	no	UCP3	Mitochondrial substrate carrier family protein
AT1G14150	AT1G14150	-	1:4839852-4841848	Col0Mockb_dir	dek2_1Mocka_dir	OK	86.6045	83.425	-0.0539609	-0.209372	0.75415	0.921795	no	PnsL2	PsbQ-like 2
AT1G14160	AT1G14160	-	1:4839852-4841848	Col0Mockb_dir	dek2_1Mocka_dir	OK	4.37134	3.94329	-0.148676	-0.108662	0.8706	0.959648	no	AT1G14160	Uncharacterized protein family (UPF0497)
AT1G14170	AT1G14170	-	1:4843233-4845847	Col0Mockb_dir	dek2_1Mocka_dir	OK	1.21379	1.77388	0.547395	0.998013	0.11845	0.456065	no	AT1G14170	RNA-binding KH domain-containing protein
AT1G14180	AT1G14180	-	1:4847161-4849207	Col0Mockb_dir	dek2_1Mocka_dir	OK	5.59799	4.3723	-0.356515	-0.962093	0.1337	0.481499	no	AT1G14180	RING/U-box superfamily protein
AT1G14185	AT1G14185	-	1:4850273-4852096	Col0Mockb_dir	dek2_1Mocka_dir	OK	4.90058	4.00517	-0.291088	-0.738596	0.2546	0.62349	no	AT1G14185	Glucose-methanol-choline (GMC) oxidoreductase family protein
AT1G14190	AT1G14190	-	1:4852801-4854307	Col0Mockb_dir	dek2_1Mocka_dir	OK	4.82244	4.14855	-0.217155	-0.52032	0.4205	0.758573	no	AT1G14190	Glucose-methanol-choline (GMC) oxidoreductase family protein
AT1G14200	AT1G14200	-	1:4854383-4855200	Col0Mockb_dir	dek2_1Mocka_dir	OK	17.3572	15.6928	-0.145433	-0.460006	0.4956	0.801751	no	AT1G14200	RING/U-box superfamily protein
AT1G14205	AT1G14205	-	1:4855532-4857964	Col0Mockb_dir	dek2_1Mocka_dir	NOTEST	0.415598	0.445719	0.100946	0	1	1	no	AT1G14205	Ribosomal L18p/L5e family protein
AT1G14210	AT1G14210	-	1:4855532-4857964	Col0Mockb_dir	dek2_1Mocka_dir	OK	18.3716	21.2995	0.213341	0.696198	0.27995	0.649036	no	AT1G14210	Ribonuclease T2 family protein
AT1G14220	AT1G14220	-	1:4858641-4859601	Col0Mockb_dir	dek2_1Mocka_dir	OK	1.42693	2.10454	0.560592	0.643403	0.302	0.667402	no	AT1G14220	Ribonuclease T2 family protein
AT1G14225	AT1G14225	-	1:4860514-4860649	Col0Mockb_dir	dek2_1Mocka_dir	NOTEST	0	2.88548	inf	0	1	1	no
AT1G14230	AT1G14230	-	1:4861265-4864094	Col0Mockb_dir	dek2_1Mocka_dir	OK	4.38691	3.97897	-0.140809	-0.398135	0.5385	0.82451	no	AT1G14230	GDA1/CD39 nucleoside phosphatase family protein
AT1G14240	AT1G14240	-	1:4864901-4868000	Col0Mockb_dir	dek2_1Mocka_dir	OK	3.11013	5.07464	0.70633	1.93368	0.00305	0.0679417	no	AT1G14240	GDA1/CD39 nucleoside phosphatase family protein
AT1G14250	AT1G14250	-	1:4868451-4871488	Col0Mockb_dir	dek2_1Mocka_dir	OK	1.69086	4.89027	1.53216	3.60181	5e-05	0.00323653	yes	AT1G14250	GDA1/CD39 nucleoside phosphatase family protein
AT1G14260	AT1G14260	-	1:4872855-4877248	Col0Mockb_dir	dek2_1Mocka_dir	OK	0.958876	0.626245	-0.614616	-0.523608	0.4247	0.761101	no	AT1G14260	RING/FYVE/PHD zinc finger superfamily protein
AT1G14270	AT1G14270	-	1:4872855-4877248	Col0Mockb_dir	dek2_1Mocka_dir	OK	8.04871	7.66327	-0.0707984	-0.218036	0.7388	0.915783	no	AT1G14270	CAAX amino terminal protease family protein
AT1G14280	AT1G14280	-	1:4877626-4879149	Col0Mockb_dir	dek2_1Mocka_dir	OK	23.1404	21.4875	-0.106915	-0.398063	0.54905	0.829085	no	PKS2	phytochrome kinase substrate 2
AT1G14290	AT1G14290	-	1:4880050-4881964	Col0Mockb_dir	dek2_1Mocka_dir	OK	16.3293	19.1552	0.230276	0.812354	0.2169	0.584765	no	SBH2	sphingoid base hydroxylase 2
AT1G14300	AT1G14300	-	1:4882375-4884791	Col0Mockb_dir	dek2_1Mocka_dir	OK	2.05265	2.48518	0.27586	0.576888	0.36105	0.712092	no	AT1G14300	ARM repeat superfamily protein
AT1G14310	AT1G14310	-	1:4885043-4887933	Col0Mockb_dir	dek2_1Mocka_dir	OK	1.60069	1.62237	0.0194087	0.030085	0.96255	0.98843	no	AT1G14310	Haloacid dehalogenase-like hydrolase (HAD) superfamily protein
AT1G14315	AT1G14315	-	1:4885043-4887933	Col0Mockb_dir	dek2_1Mocka_dir	NOTEST	0	0	0	0	1	1	no	AT1G14315	F-box and associated interaction domains-containing protein
AT1G14320	AT1G14320	-	1:4888213-4889661	Col0Mockb_dir	dek2_1Mocka_dir	OK	591.984	651.225	0.137599	0.473307	0.46105	0.781182	no	SAC52	Ribosomal protein L16p/L10e family protein
AT1G14330	AT1G14330	-	1:4890117-4892251	Col0Mockb_dir	dek2_1Mocka_dir	OK	5.84783	7.12958	0.285914	0.837867	0.18795	0.551621	no	AT1G14330	Galactose oxidase/kelch repeat superfamily protein
AT1G14340	AT1G14340	-	1:4897345-4898961	Col0Mockb_dir	dek2_1Mocka_dir	OK	18.3673	17.5179	-0.0683109	-0.237339	0.7132	0.904521	no	AT1G14340	RNA-binding (RRM/RBD/RNP motifs) family protein
AT1G14345	AT1G14345	-	1:4899144-4899979	Col0Mockb_dir	dek2_1Mocka_dir	OK	213.679	196.703	-0.119433	-0.489587	0.47	0.787362	no	AT1G14345	NAD(P)-linked oxidoreductase superfamily protein
AT1G14350	AT1G14350	-	1:4907952-4913152	Col0Mockb_dir	dek2_1Mocka_dir	OK	4.70571	4.42946	-0.0872825	-0.173747	0.78415	0.931094	no	FLP	Duplicated homeodomain-like superfamily protein
AT1G14360	AT1G14360	-	1:4907952-4913152	Col0Mockb_dir	dek2_1Mocka_dir	OK	15.4649	14.5904	-0.0839786	-0.253182	0.69285	0.896214	no	UTR3	UDP-galactose transporter 3
AT1G14370	AT1G14370	-	1:4915575-4921596	Col0Mockb_dir	dek2_1Mocka_dir	OK	3.53127	4.79142	0.440268	0.77112	0.23735	0.605344	no	APK2A	protein kinase 2A
AT1G14380	AT1G14380	-	1:4915575-4921596	Col0Mockb_dir	dek2_1Mocka_dir	OK	9.13395	8.54735	-0.0957625	-0.316299	0.62505	0.868527	no	IQD28	IQ-domain 28
AT1G14390	AT1G14390	-	1:4924276-4926794	Col0Mockb_dir	dek2_1Mocka_dir	OK	0.933748	1.23694	0.405675	0.650653	0.3108	0.673817	no	AT1G14390	Leucine-rich repeat protein kinase family protein
AT1G14400	AT1G14400	-	1:4927010-4928690	Col0Mockb_dir	dek2_1Mocka_dir	OK	89.4282	72.8021	-0.296749	-1.15034	0.0781	0.378852	no	UBC1	ubiquitin carrier protein 1
AT1G14410	AT1G14410	-	1:4929122-4930904	Col0Mockb_dir	dek2_1Mocka_dir	OK	16.5784	15.3663	-0.10953	-0.376092	0.55735	0.832987	no	WHY1	ssDNA-binding transcriptional regulator
AT1G14420	AT1G14420	-	1:4931565-4933515	Col0Mockb_dir	dek2_1Mocka_dir	NOTEST	0.0901858	0.0496974	-0.85973	0	1	1	no	AT59	Pectate lyase family protein
AT1G14430	AT1G14430	-	1:4934119-4936100	Col0Mockb_dir	dek2_1Mocka_dir	OK	2.52339	2.47173	-0.0298398	-0.0691464	0.9183	0.974097	no	AT1G14430	glyoxal oxidase-related protein
AT1G14440	AT1G14440	-	1:4938823-4940903	Col0Mockb_dir	dek2_1Mocka_dir	OK	8.84597	6.9134	-0.355624	-1.09257	0.0885	0.402011	no	HB31	homeobox protein 31
AT1G14450	AT1G14450	-	1:4946217-4947576	Col0Mockb_dir	dek2_1Mocka_dir	OK	37.7015	53.587	0.507262	1.93323	0.00305	0.0679417	no	AT1G14450	NADH dehydrogenase (ubiquinone)s
AT1G14455	AT1G14455	-	1:4947818-4948400	Col0Mockb_dir	dek2_1Mocka_dir	OK	0.573838	1.54598	1.4298	1.11276	0.19635	0.56259	no	AT1G14455	hypothetical protein
AT1G14460	AT1G14460	-	1:4948747-4952927	Col0Mockb_dir	dek2_1Mocka_dir	OK	2.46286	2.40883	-0.0319999	-0.090416	0.8904	0.96546	no	AT1G14460	AAA-type ATPase family protein
AT1G14470	AT1G14470	-	1:4954079-4955702	Col0Mockb_dir	dek2_1Mocka_dir	NOTEST	0.0697205	0.270965	1.95845	0	1	1	no	AT1G14470	Pentatricopeptide repeat (PPR) superfamily protein
AT1G14480	AT1G14480	-	1:4956256-4958076	Col0Mockb_dir	dek2_1Mocka_dir	OK	1.88559	1.72753	-0.126299	-0.220206	0.7249	0.909734	no	AT1G14480	Ankyrin repeat family protein
AT1G14490	AT1G14490	-	1:4958513-4959325	Col0Mockb_dir	dek2_1Mocka_dir	OK	1.30727	1.22425	-0.0946554	-0.120317	0.87885	0.960516	no	AT1G14490	Putative AT-hook DNA-binding family protein
AT1G14500	AT1G14500	-	1:4960374-4961780	Col0Mockb_dir	dek2_1Mocka_dir	NOTEST	0	0.198114	inf	0	1	1	no	AT1G14500	Ankyrin repeat family protein
AT1G14510	AT1G14510	-	1:4961885-4964428	Col0Mockb_dir	dek2_1Mocka_dir	OK	19.6365	17.89	-0.134383	-0.50596	0.4349	0.767242	no	AL7	alfin-like 7
AT1G14520	AT1G14520	-	1:4968141-4970311	Col0Mockb_dir	dek2_1Mocka_dir	OK	0.504848	0.757419	0.585244	0.686323	0.28435	0.652594	no	MIOX1	myo-inositol oxygenase 1
AT1G14530	AT1G14530	-	1:4970857-4973726	Col0Mockb_dir	dek2_1Mocka_dir	OK	1.35883	1.27954	-0.0867371	-0.154233	0.81745	0.941345	no	THH1	tobamovirus multiplication-like protein (DUF1084)
AT1G14540	AT1G14540	-	1:4974066-4975705	Col0Mockb_dir	dek2_1Mocka_dir	OK	1.47376	2.75331	0.901664	1.49432	0.02185	0.205192	no	PER4	Peroxidase superfamily protein
AT1G14549	AT1G14549	-	1:4978793-4978907	Col0Mockb_dir	dek2_1Mocka_dir	NOTEST	0	0	0	0	1	1	no
AT1G14550	AT1G14550	-	1:4979027-4980324	Col0Mockb_dir	dek2_1Mocka_dir	NOTEST	0.0420211	0.197114	2.22984	0	1	1	no	AT1G14550	Peroxidase superfamily protein
AT1G14560	AT1G14560	-	1:4980671-4983284	Col0Mockb_dir	dek2_1Mocka_dir	OK	7.22452	5.11196	-0.499027	-1.52217	0.01885	0.193152	no	AT1G14560	Mitochondrial substrate carrier family protein
AT1G14570	AT1G14570	-	1:4983534-4987375	Col0Mockb_dir	dek2_1Mocka_dir	OK	9.84518	9.92205	0.0112208	0.0416435	0.94925	0.985123	no	AT1G14570	UBX domain-containing protein
AT1G14580	AT1G14580	-	1:4989561-4992732	Col0Mockb_dir	dek2_1Mocka_dir	OK	6.60978	6.23258	-0.0847726	-0.287266	0.6573	0.881048	no	AT1G14580	C2H2-like zinc finger protein
AT1G14590	AT1G14590	-	1:4998815-5000643	Col0Mockb_dir	dek2_1Mocka_dir	OK	6.14421	3.96021	-0.63365	-1.60366	0.0134	0.162208	no	AT1G14590	Nucleotide-diphospho-sugar transferase family protein
AT1G14600	AT1G14600	-	1:5001010-5003370	Col0Mockb_dir	dek2_1Mocka_dir	OK	2.2791	2.41539	0.0837922	0.170546	0.79025	0.93315	no	AT1G14600	Homeodomain-like superfamily protein
AT1G14610	AT1G14610	-	1:5008243-5014533	Col0Mockb_dir	dek2_1Mocka_dir	OK	12.703	13.3357	0.0701161	0.270945	0.6741	0.887273	no	TWN2	valyl-tRNA synthetase / valine-tRNA ligase (VALRS)
AT1G14620	AT1G14620	-	1:5014752-5016604	Col0Mockb_dir	dek2_1Mocka_dir	OK	20.7838	17.8714	-0.217806	-0.774334	0.2302	0.597954	no	DECOY	decoy
AT1G14630	AT1G14630	-	1:5019954-5021537	Col0Mockb_dir	dek2_1Mocka_dir	OK	6.38872	5.61972	-0.185028	-0.459578	0.47275	0.788787	no	AT1G14630	XRI1-like protein
AT1G14640	AT1G14640	-	1:5023655-5025955	Col0Mockb_dir	dek2_1Mocka_dir	OK	0.385072	0.539287	0.485924	0.583325	0.4105	0.751528	no	AT1G14640	SWAP (Suppressor-of-White-APricot)/surp domain-containing protein
AT1G14642	AT1G14642	-	1:5026363-5026585	Col0Mockb_dir	dek2_1Mocka_dir	NOTEST	0	0.898769	inf	0	1	1	no	AT1G14642	hypothetical protein
AT1G14650	AT1G14650	-	1:5027661-5031779	Col0Mockb_dir	dek2_1Mocka_dir	OK	15.3539	12.5595	-0.289829	-1.14869	0.0869	0.398282	no	AT1G14650	SWAP (Suppressor-of-White-APricot)/surp domain-containing protein / ubiquitin family protein
AT1G14660	AT1G14660	-	1:5031949-5036477	Col0Mockb_dir	dek2_1Mocka_dir	OK	1.41028	1.4782	0.0678552	0.153611	0.81475	0.940802	no	NHX8	Na /H exchanger 8
AT1G14670	AT1G14670	-	1:5037611-5040528	Col0Mockb_dir	dek2_1Mocka_dir	OK	23.708	25.3145	0.0945933	0.367239	0.57265	0.840592	no	AT1G14670	Endomembrane protein 70 protein family
AT1G14680	AT1G14680	-	1:5040860-5041733	Col0Mockb_dir	dek2_1Mocka_dir	OK	1.57534	0.787564	-1.0002	-1.03535	0.14135	0.49276	no	AT1G14680	early endosome antigen
AT1G14685	AT1G14685	-	1:5042322-5044294	Col0Mockb_dir	dek2_1Mocka_dir	OK	34.3527	28.2631	-0.281501	-1.08837	0.09365	0.410622	no	BPC2	basic pentacysteine 2
AT1G14686	AT1G14686	-	1:5045780-5046800	Col0Mockb_dir	dek2_1Mocka_dir	NOTEST	0.170175	0.119898	-0.505214	0	1	1	no	AT1G14686	ENTH/ANTH/VHS superfamily protein
AT1G14687	AT1G14687	-	1:5047802-5048612	Col0Mockb_dir	dek2_1Mocka_dir	OK	1.41377	1.95377	0.466712	0.586981	0.3571	0.708973	no	HB32	homeobox protein 32
AT1G14688	AT1G14688	-	1:5049525-5050983	Col0Mockb_dir	dek2_1Mocka_dir	NOTEST	0	0	0	0	1	1	no	AT1G14688	E3 ubiquitin ligase
AT1G14690	AT1G14690	-	1:5051759-5055252	Col0Mockb_dir	dek2_1Mocka_dir	OK	12.1916	10.6984	-0.188496	-0.69625	0.2758	0.644093	no	MAP65-7	microtubule-associated protein 65-7
AT1G14700	AT1G14700	-	1:5058679-5061136	Col0Mockb_dir	dek2_1Mocka_dir	OK	13.9207	11.5287	-0.271996	-0.947964	0.14675	0.498765	no	PAP3	purple acid phosphatase 3
AT1G14710	AT1G14710	-	1:5061865-5065178	Col0Mockb_dir	dek2_1Mocka_dir	OK	27.1405	23.4721	-0.209502	-0.831165	0.2068	0.57463	no	AT1G14710	hydroxyproline-rich glycoprotein family protein
AT1G14720	AT1G14720	-	1:5066635-5068645	Col0Mockb_dir	dek2_1Mocka_dir	OK	43.9908	49.6371	0.174217	0.678035	0.2975	0.664455	no	XTH28	xyloglucan endotransglucosylase/hydrolase 28
AT1G14730	AT1G14730	-	1:5073104-5074779	Col0Mockb_dir	dek2_1Mocka_dir	OK	16.8254	16.5284	-0.0256902	-0.0898618	0.8902	0.965295	no	AT1G14730	Cytochrome b561/ferric reductase transmembrane protein family
AT1G14740	AT1G14740	-	1:5075212-5077791	Col0Mockb_dir	dek2_1Mocka_dir	OK	19.3337	20.3886	0.0766397	0.305281	0.6451	0.876522	no	TTA1	class I heat shock protein, putative (DUF1423)
AT1G14750	AT1G14750	-	1:5079406-5082520	Col0Mockb_dir	dek2_1Mocka_dir	NOTEST	0.440476	0.215338	-1.03246	0	1	1	no	SDS	Cyclin family protein
AT1G14755	AT1G14755	-	1:5083741-5084342	Col0Mockb_dir	dek2_1Mocka_dir	NOTEST	0	0	0	0	1	1	no	AT1G14755	S locus-related glycoprotein 1 (SLR1) binding pollen coat protein family
AT1G14760	AT1G14760	-	1:5084351-5085213	Col0Mockb_dir	dek2_1Mocka_dir	NOTEST	0.111566	0.271756	1.28442	0	1	1	no	KNATM	KNOX meinox protein
AT1G14770	AT1G14770	-	1:5086625-5088846	Col0Mockb_dir	dek2_1Mocka_dir	OK	4.68685	4.09703	-0.194039	-0.518914	0.4152	0.753696	no	AT1G14770	RING/FYVE/PHD zinc finger superfamily protein
AT1G14780	AT1G14780	-	1:5090989-5098032	Col0Mockb_dir	dek2_1Mocka_dir	OK	1.08591	1.2888	0.247127	0.414439	0.52595	0.818058	no	AT1G14780	MAC/Perforin domain-containing protein
AT1G14790	AT1G14790	-	1:5090989-5098032	Col0Mockb_dir	dek2_1Mocka_dir	OK	1.43561	1.41866	-0.017127	-0.0355315	0.95275	0.986086	no	RDR1	RNA-dependent RNA polymerase 1
AT1G14800	AT1G14800	-	1:5099571-5104695	Col0Mockb_dir	dek2_1Mocka_dir	NOTEST	0.155182	0.0897146	-0.790542	0	1	1	no	AT1G14800	Nucleic acid-binding, OB-fold-like protein
AT1G14810	AT1G14810	-	1:5099571-5104695	Col0Mockb_dir	dek2_1Mocka_dir	OK	26.45	24.9618	-0.0835462	-0.317415	0.62025	0.865295	no	AT1G14810	semialdehyde dehydrogenase family protein
AT1G14820	AT1G14820	-	1:5105017-5106954	Col0Mockb_dir	dek2_1Mocka_dir	OK	7.16803	7.08097	-0.0176309	-0.0515291	0.93795	0.980953	no	AT1G14820	Sec14p-like phosphatidylinositol transfer family protein
AT1G14830	AT1G14830	-	1:5107420-5111670	Col0Mockb_dir	dek2_1Mocka_dir	OK	13.9268	12.3009	-0.179096	-0.682333	0.28875	0.657284	no	DL1C	DYNAMIN-like 1C
AT1G14840	AT1G14840	-	1:5111954-5115497	Col0Mockb_dir	dek2_1Mocka_dir	OK	8.99937	6.65915	-0.434485	-1.56243	0.0188	0.192806	no	MAP70-4	microtubule-associated proteins 70-4
AT1G14850	AT1G14850	-	1:5116695-5123259	Col0Mockb_dir	dek2_1Mocka_dir	OK	3.76909	3.1891	-0.241066	-0.833166	0.19615	0.562421	no	NUP155	nucleoporin 155
AT1G14860	AT1G14860	-	1:5124741-5126151	Col0Mockb_dir	dek2_1Mocka_dir	OK	19.2807	15.0011	-0.362092	-1.19959	0.06325	0.343695	no	NUDT18	nudix hydrolase homolog 18
AT1G14870	AT1G14870	-	1:5128374-5129523	Col0Mockb_dir	dek2_1Mocka_dir	OK	38.5761	42.958	0.155219	0.57484	0.3757	0.724456	no	PCR2	PLANT CADMIUM RESISTANCE 2
AT1G14880	AT1G14880	-	1:5132534-5133716	Col0Mockb_dir	dek2_1Mocka_dir	NOTEST	0.0295638	0.456488	3.94867	0	1	1	no	PCR1	PLANT CADMIUM RESISTANCE 1
AT1G14890	AT1G14890	-	1:5137013-5137957	Col0Mockb_dir	dek2_1Mocka_dir	OK	15.3695	14.9957	-0.035524	-0.123646	0.86305	0.957466	no	AT1G14890	Plant invertase/pectin methylesterase inhibitor superfamily protein
AT1G14900	AT1G14900	-	1:5138333-5139432	Col0Mockb_dir	dek2_1Mocka_dir	OK	43.5477	31.6225	-0.461645	-1.88537	0.0076	0.118933	no	HMGA	high mobility group A
AT1G14910	AT1G14910	-	1:5139711-5143689	Col0Mockb_dir	dek2_1Mocka_dir	OK	12.4314	9.88315	-0.330945	-1.27665	0.0571	0.328354	no	AT1G14910	ENTH/ANTH/VHS superfamily protein
AT1G14920	AT1G14920	-	1:5149225-5151354	Col0Mockb_dir	dek2_1Mocka_dir	OK	10.4018	7.58475	-0.45566	-1.56325	0.0189	0.193152	no	GAI	GRAS family transcription factor family protein
AT1G14930	AT1G14930	-	1:5152262-5153084	Col0Mockb_dir	dek2_1Mocka_dir	NOTEST	0.150281	0.0816312	-0.880468	0	1	1	no	AT1G14930	Polyketide cyclase/dehydrase and lipid transport superfamily protein
AT1G14940	AT1G14940	-	1:5154536-5155564	Col0Mockb_dir	dek2_1Mocka_dir	NOTEST	0	0	0	0	1	1	no	AT1G14940	Polyketide cyclase/dehydrase and lipid transport superfamily protein
AT1G14950	AT1G14950	-	1:5157335-5158269	Col0Mockb_dir	dek2_1Mocka_dir	NOTEST	0	0	0	0	1	1	no	AT1G14950	Polyketide cyclase/dehydrase and lipid transport superfamily protein
AT1G14960	AT1G14960	-	1:5159198-5160083	Col0Mockb_dir	dek2_1Mocka_dir	OK	10.5624	13.5053	0.354586	1.04013	0.1292	0.472895	no	AT1G14960	Polyketide cyclase/dehydrase and lipid transport superfamily protein
AT1G14970	AT1G14970	-	1:5161948-5164917	Col0Mockb_dir	dek2_1Mocka_dir	OK	1.61741	2.18437	0.433527	0.956735	0.1408	0.491875	no	AT1G14970	O-fucosyltransferase family protein
AT1G14980	AT1G14980	-	1:5165627-5166745	Col0Mockb_dir	dek2_1Mocka_dir	OK	89.4296	82.8136	-0.110883	-0.42101	0.50905	0.809841	no	CPN10	chaperonin 10
AT1G14990	AT1G14990	-	1:5167030-5168264	Col0Mockb_dir	dek2_1Mocka_dir	OK	6.70895	7.18264	0.0984267	0.235352	0.71085	0.903379	no	AT1G14990	transmembrane protein
AT1G15000	AT1G15000	-	1:5168595-5170066	Col0Mockb_dir	dek2_1Mocka_dir	OK	9.28575	7.15401	-0.376267	-1.32925	0.06595	0.350252	no	scpl50	serine carboxypeptidase-like 50
AT1G15010	AT1G15010	-	1:5171206-5171742	Col0Mockb_dir	dek2_1Mocka_dir	OK	1.8375	1.27445	-0.527872	-0.524607	0.4823	0.794056	no	AT1G15010	mediator of RNA polymerase II transcription subunit
AT1G15015	AT1G15015	-	1:5172080-5172923	Col0Mockb_dir	dek2_1Mocka_dir	NOTEST	0.477383	0.144869	-1.7204	0	1	1	no	AT1G15015	F-box family protein
AT1G15020	AT1G15020	-	1:5173096-5176223	Col0Mockb_dir	dek2_1Mocka_dir	OK	6.75747	5.7129	-0.242261	-0.80096	0.2031	0.571195	no	QSOX1	quiescin-sulfhydryl oxidase 1
AT1G15030	AT1G15030	-	1:5177528-5181389	Col0Mockb_dir	dek2_1Mocka_dir	OK	16.5491	14.6302	-0.177806	-0.626426	0.3355	0.691633	no	AT1G15030	hypothetical protein (DUF789)
AT1G15040	AT1G15040	-	1:5177528-5181389	Col0Mockb_dir	dek2_1Mocka_dir	OK	2.33008	3.19148	0.453846	0.575285	0.3949	0.739568	no	GAT1_2.1	Class I glutamine amidotransferase-like superfamily protein
AT1G15045	AT1G15045	-	1:5181856-5181964	Col0Mockb_dir	dek2_1Mocka_dir	NOTEST	0	0	0	0	1	1	no
AT1G15050	AT1G15050	-	1:5182255-5183243	Col0Mockb_dir	dek2_1Mocka_dir	NOTEST	0.415087	0.154829	-1.42274	0	1	1	no	IAA34	indole-3-acetic acid inducible 34
AT1G15060	AT1G15060	-	1:5183606-5186974	Col0Mockb_dir	dek2_1Mocka_dir	OK	7.41838	7.04741	-0.0740121	-0.25831	0.6896	0.894222	no	AT1G15060	alpha/beta hydrolase family protein
AT1G15080	AT1G15080	-	1:5187625-5189673	Col0Mockb_dir	dek2_1Mocka_dir	OK	3.70872	2.94801	-0.331177	-0.769687	0.2363	0.604066	no	LPP2	lipid phosphate phosphatase 2
AT1G15100	AT1G15100	-	1:5193425-5194203	Col0Mockb_dir	dek2_1Mocka_dir	OK	42.1994	38.2279	-0.142594	-0.550645	0.42955	0.764112	no	RHA2A	RING-H2 finger A2A
AT1G15110	AT1G15110	-	1:5199017-5202175	Col0Mockb_dir	dek2_1Mocka_dir	OK	3.09978	3.78185	0.286926	0.785216	0.2191	0.587834	no	PSS1	phosphatidyl serine synthase family protein
AT1G15120	AT1G15120	-	1:5202647-5204193	Col0Mockb_dir	dek2_1Mocka_dir	OK	23.8294	26.8666	0.17307	0.61805	0.33365	0.690541	no	AT1G15120	Ubiquinol-cytochrome C reductase hinge protein
AT1G15125	AT1G15125	-	1:5204624-5205912	Col0Mockb_dir	dek2_1Mocka_dir	OK	2.02376	4.58995	1.18144	2.24384	0.00315	0.0694707	no	AT1G15125	S-adenosyl-L-methionine-dependent methyltransferases superfamily protein
AT1G15130	AT1G15130	-	1:5206001-5209915	Col0Mockb_dir	dek2_1Mocka_dir	OK	14.4766	12.4609	-0.216319	-0.846823	0.19595	0.562109	no	AT1G15130	Endosomal targeting BRO1-like domain-containing protein
AT1G15140	AT1G15140	-	1:5210205-5212349	Col0Mockb_dir	dek2_1Mocka_dir	OK	15.0207	14.545	-0.0464283	-0.17783	0.7979	0.935584	no	AT1G15140	FAD/NAD(P)-binding oxidoreductase
AT1G15150	AT1G15150	-	1:5212614-5214858	Col0Mockb_dir	dek2_1Mocka_dir	OK	0.505179	0.258372	-0.967347	-0.973138	0.1505	0.503271	no	AT1G15150	MATE efflux family protein
AT1G15160	AT1G15160	-	1:5215474-5217545	Col0Mockb_dir	dek2_1Mocka_dir	OK	5.71652	3.7191	-0.620184	-1.66249	0.0159	0.179658	no	AT1G15160	MATE efflux family protein
AT1G15165	AT1G15165	-	1:5217718-5220113	Col0Mockb_dir	dek2_1Mocka_dir	OK	2.32118	1.48894	-0.640574	-1.22742	0.0673	0.352909	no	AT1G15165	RING/FYVE/PHD zinc finger superfamily protein
AT1G15170	AT1G15170	-	1:5220640-5222973	Col0Mockb_dir	dek2_1Mocka_dir	OK	6.23194	4.85552	-0.360056	-1.05952	0.10525	0.433368	no	AT1G15170	MATE efflux family protein
AT1G15180	AT1G15180	-	1:5224384-5226702	Col0Mockb_dir	dek2_1Mocka_dir	OK	12.1665	11.1047	-0.131731	-0.475641	0.4813	0.793819	no	AT1G15180	MATE efflux family protein
AT1G15190	AT1G15190	-	1:5227052-5228202	Col0Mockb_dir	dek2_1Mocka_dir	OK	1.11188	0.53411	-1.05779	-1.24386	0.142	0.493473	no	AT1G15190	Fasciclin-like arabinogalactan family protein
AT1G15200	AT1G15200	-	1:5228299-5231184	Col0Mockb_dir	dek2_1Mocka_dir	OK	43.3467	36.8114	-0.235767	-0.905029	0.15875	0.513882	no	AT1G15200	protein-protein interaction regulator family protein
AT1G15210	AT1G15210	-	1:5231347-5236573	Col0Mockb_dir	dek2_1Mocka_dir	OK	7.91348	9.01865	0.188599	0.718456	0.2703	0.639185	no	ABCG35	pleiotropic drug resistance 7
AT1G15215	AT1G15215	-	1:5238064-5241538	Col0Mockb_dir	dek2_1Mocka_dir	OK	4.49435	4.08698	-0.137076	-0.279631	0.6698	0.886648	no	SHH1	SAWADEE HOMEODOMAIN protein
AT1G15220	AT1G15220	-	1:5238064-5241538	Col0Mockb_dir	dek2_1Mocka_dir	OK	4.66967	3.48948	-0.420311	-0.78683	0.22765	0.595838	no	CCMH	cytochrome c biogenesis protein family
AT1G15230	AT1G15230	-	1:5242197-5243227	Col0Mockb_dir	dek2_1Mocka_dir	OK	36.2056	29.8931	-0.276398	-1.06823	0.11565	0.451393	no	AT1G15230	hypothetical protein
AT1G15240	AT1G15240	-	1:5243449-5248604	Col0Mockb_dir	dek2_1Mocka_dir	OK	2.09145	2.37151	0.181304	0.522382	0.41835	0.756521	no	AT1G15240	phox (PX) domain-containing protein
AT1G15250	AT1G15250	-	1:5248663-5249474	Col0Mockb_dir	dek2_1Mocka_dir	OK	4.35176	4.64976	0.0955582	0.170554	0.78735	0.932537	no	AT1G15250	Zinc-binding ribosomal protein family protein
AT1G15260	AT1G15260	-	1:5249759-5250573	Col0Mockb_dir	dek2_1Mocka_dir	OK	55.4327	41.2826	-0.425204	-1.62058	0.01695	0.183959	no	AT1G15260	LOW protein: ATP-dependent RNA helicase-like protein
AT1G15270	AT1G15270	-	1:5250649-5252121	Col0Mockb_dir	dek2_1Mocka_dir	OK	117.211	96.5885	-0.27918	-1.09944	0.09205	0.407251	no	AT1G15270	Translation machinery associated TMA7
AT1G15280	AT1G15280	-	1:5252314-5256753	Col0Mockb_dir	dek2_1Mocka_dir	OK	8.21871	6.75362	-0.28325	-1.02751	0.1095	0.440942	no	AT1G15280	CASC3/Barentsz eIF4AIII binding protein
AT1G15290	AT1G15290	-	1:5257045-5264942	Col0Mockb_dir	dek2_1Mocka_dir	OK	33.1233	30.2648	-0.130206	-0.495676	0.44355	0.771696	no	AT1G15290	Tetratricopeptide repeat (TPR)-like superfamily protein
AT1G15310	AT1G15310	-	1:5269018-5272058	Col0Mockb_dir	dek2_1Mocka_dir	OK	3.05042	2.70729	-0.172158	-0.446573	0.49455	0.801157	no	ATHSRP54A	signal recognition particle 54 kDa subunit
AT1G15320	AT1G15320	-	1:5272255-5274074	Col0Mockb_dir	dek2_1Mocka_dir	NOTEST	0.0275639	0.0841519	1.61021	0	1	1	no	AT1G15320	seed dormancy control protein
AT1G15330	AT1G15330	-	1:5274345-5275602	Col0Mockb_dir	dek2_1Mocka_dir	OK	0.597688	0.0699013	-3.096	-1.66664	0.05325	0.317573	no	AT1G15330	Cystathionine beta-synthase (CBS) protein
AT1G15340	AT1G15340	-	1:5275676-5277689	Col0Mockb_dir	dek2_1Mocka_dir	OK	55.4934	45.9448	-0.272417	-1.21409	0.1024	0.428897	no	MBD10	methyl-CPG-binding domain 10
AT1G15350	AT1G15350	-	1:5278259-5279877	Col0Mockb_dir	dek2_1Mocka_dir	OK	10.3755	11.1458	0.103316	0.323933	0.60825	0.859018	no	AT1G15350	DUF4050 family protein
AT1G15360	AT1G15360	-	1:5283537-5284673	Col0Mockb_dir	dek2_1Mocka_dir	NOTEST	0.125786	0.0536941	-1.22814	0	1	1	no	SHN1	Integrase-type DNA-binding superfamily protein
AT1G15370	AT1G15370	-	1:5287046-5288577	Col0Mockb_dir	dek2_1Mocka_dir	OK	37.2795	29.6376	-0.330958	-1.24522	0.05595	0.325349	no	AT1G15370	SNARE-like superfamily protein
AT1G15380	AT1G15380	-	1:5290744-5292535	Col0Mockb_dir	dek2_1Mocka_dir	OK	28.3307	28.0567	-0.0140182	-0.0515028	0.93335	0.980049	no	GLYI4	Lactoylglutathione lyase / glyoxalase I family protein
AT1G15385	AT1G15385	-	1:5292755-5293265	Col0Mockb_dir	dek2_1Mocka_dir	OK	1.72274	1.04314	-0.723777	-0.598485	0.3716	0.71991	no	AT1G15385	cotton fiber protein
AT1G15390	AT1G15390	-	1:5294628-5296902	Col0Mockb_dir	dek2_1Mocka_dir	OK	45.0231	32.9911	-0.448587	-1.19035	0.0705	0.3604	no	PDF1A	peptide deformylase 1A
AT1G15400	AT1G15400	-	1:5294628-5296902	Col0Mockb_dir	dek2_1Mocka_dir	OK	47.2699	41.7286	-0.179887	-0.509599	0.45295	0.776213	no	AT1G15400	hypothetical protein
AT1G15410	AT1G15410	-	1:5298323-5301412	Col0Mockb_dir	dek2_1Mocka_dir	OK	13.2925	14.7131	0.146493	0.529401	0.4142	0.75327	no	AT1G15410	aspartate-glutamate racemase family
AT1G15415	AT1G15415	-	1:5298323-5301412	Col0Mockb_dir	dek2_1Mocka_dir	OK	2.28062	4.62689	1.02062	0.705592	0.2675	0.636761	no	AT1G15415	late embryogenesis abundant-like protein
AT1G15420	AT1G15420	-	1:5301612-5303390	Col0Mockb_dir	dek2_1Mocka_dir	OK	13.6249	13.0061	-0.0670559	-0.227012	0.72265	0.908817	no	AT1G15420	WD repeat protein
AT1G15430	AT1G15430	-	1:5304316-5306012	Col0Mockb_dir	dek2_1Mocka_dir	OK	3.93072	7.21239	0.875682	2.28236	0.0013	0.0383404	yes	AT1G15430	hypothetical protein (DUF1644)
AT1G15440	AT1G15440	-	1:5306060-5309514	Col0Mockb_dir	dek2_1Mocka_dir	OK	5.98488	7.00361	0.226776	0.788376	0.22405	0.592425	no	PWP2	periodic tryptophan protein 2
AT1G15460	AT1G15460	-	1:5310000-5314094	Col0Mockb_dir	dek2_1Mocka_dir	OK	0.545928	0.416006	-0.392106	-0.567178	0.3944	0.739157	no	BOR4	HCO3- transporter family
AT1G15470	AT1G15470	-	1:5315506-5317863	Col0Mockb_dir	dek2_1Mocka_dir	OK	12.1566	10.6524	-0.19056	-0.666314	0.30825	0.672089	no	AT1G15470	Transducin/WD40 repeat-like superfamily protein
AT1G15480	AT1G15480	-	1:5318010-5320594	Col0Mockb_dir	dek2_1Mocka_dir	OK	6.21491	5.66033	-0.134846	-0.431294	0.50355	0.805979	no	AT1G15480	Tetratricopeptide repeat (TPR)-like superfamily protein
AT1G15490	AT1G15490	-	1:5320614-5323895	Col0Mockb_dir	dek2_1Mocka_dir	OK	2.56681	2.78588	0.118156	0.317849	0.6254	0.86865	no	AT1G15490	alpha/beta-Hydrolases superfamily protein
AT1G15500	AT1G15500	-	1:5326289-5328874	Col0Mockb_dir	dek2_1Mocka_dir	OK	100.554	84.5094	-0.250782	-0.969056	0.1383	0.489054	no	ATNTT2	TLC ATP/ADP transporter
AT1G15510	AT1G15510	-	1:5329110-5331711	Col0Mockb_dir	dek2_1Mocka_dir	OK	1.71297	1.77206	0.0489289	0.101887	0.8745	0.96009	no	ECB2	Tetratricopeptide repeat (TPR)-like superfamily protein
AT1G15520	AT1G15520	-	1:5331857-5338326	Col0Mockb_dir	dek2_1Mocka_dir	OK	0.677615	0.599762	-0.176075	-0.351468	0.5844	0.847236	no	ABCG40	pleiotropic drug resistance 12
AT1G15530	AT1G15530	-	1:5339960-5341931	Col0Mockb_dir	dek2_1Mocka_dir	OK	3.7107	4.41873	0.251942	0.698585	0.3133	0.675637	no	AT1G15530	Concanavalin A-like lectin protein kinase family protein
AT1G15540	AT1G15540	-	1:5342586-5343705	Col0Mockb_dir	dek2_1Mocka_dir	OK	4.91789	1.49111	-1.72166	-2.85238	0.0003	0.0135934	yes	AT1G15540	2-oxoglutarate-dependent dioxygenase-like protein
AT1G15550	AT1G15550	-	1:5344477-5346166	Col0Mockb_dir	dek2_1Mocka_dir	OK	20.6359	13.7049	-0.590467	-2.17515	0.00155	0.0432806	yes	GA3OX1	gibberellin 3-oxidase 1
AT1G15570	AT1G15570	-	1:5362008-5365549	Col0Mockb_dir	dek2_1Mocka_dir	OK	5.18289	4.16127	-0.316733	-0.983999	0.1268	0.469912	no	CYCA2;3	CYCLIN A2;3
AT1G15580	AT1G15580	-	1:5365664-5366497	Col0Mockb_dir	dek2_1Mocka_dir	OK	1.05717	1.63719	0.631009	0.639289	0.3146	0.67683	no	IAA5	indole-3-acetic acid inducible 5
AT1G15590	AT1G15590	-	1:5367296-5368670	Col0Mockb_dir	dek2_1Mocka_dir	NOTEST	0	0	0	0	1	1	no	AT1G15590	E3 ubiquitin-protein ligase
AT1G15600	AT1G15600	-	1:5368922-5370344	Col0Mockb_dir	dek2_1Mocka_dir	NOTEST	0	0	0	0	1	1	no	AT1G15600	transmembrane protein
AT1G15610	AT1G15610	-	1:5370676-5371859	Col0Mockb_dir	dek2_1Mocka_dir	NOTEST	0	0	0	0	1	1	no	AT1G15610	transmembrane protein
AT1G15620	AT1G15620	-	1:5373503-5374575	Col0Mockb_dir	dek2_1Mocka_dir	NOTEST	0	0	0	0	1	1	no	AT1G15620	transmembrane protein
AT1G15630	AT1G15630	-	1:5376792-5378027	Col0Mockb_dir	dek2_1Mocka_dir	NOTEST	0.134407	0.0545241	-1.30164	0	1	1	no	AT1G15630	transmembrane protein
AT1G15640	AT1G15640	-	1:5378885-5380139	Col0Mockb_dir	dek2_1Mocka_dir	OK	0.54336	0.320695	-0.760708	-0.494841	0.43725	0.768748	no	AT1G15640	transmembrane protein
AT1G15660	AT1G15660	-	1:5381169-5385254	Col0Mockb_dir	dek2_1Mocka_dir	OK	2.86918	3.05057	0.0884376	0.251743	0.6962	0.897461	no	CENP-C	centromere protein C
AT1G15670	AT1G15670	-	1:5389951-5391490	Col0Mockb_dir	dek2_1Mocka_dir	OK	9.5603	8.50095	-0.169431	-0.546411	0.423	0.760194	no	AT1G15670	Galactose oxidase/kelch repeat superfamily protein
AT1G15680	AT1G15680	-	1:5393406-5394639	Col0Mockb_dir	dek2_1Mocka_dir	NOTEST	0	0	0	0	1	1	no	AT1G15680	F-box family protein
AT1G15690	AT1G15690	-	1:5398989-5403818	Col0Mockb_dir	dek2_1Mocka_dir	OK	204.499	187.874	-0.12233	-0.438579	0.49235	0.799981	no	AVP1	Inorganic H pyrophosphatase family protein
AT1G15700	AT1G15700	-	1:5398989-5403818	Col0Mockb_dir	dek2_1Mocka_dir	OK	6.49943	5.92513	-0.133467	-0.0495323	0.90095	0.969308	no	ATPC2	ATPase, F1 complex, gamma subunit protein
AT1G15710	AT1G15710	-	1:5404357-5405686	Col0Mockb_dir	dek2_1Mocka_dir	OK	12.9902	11.6706	-0.154547	-0.516751	0.45005	0.774572	no	AT1G15710	prephenate dehydrogenase family protein
AT1G15720	AT1G15720	-	1:5406024-5409987	Col0Mockb_dir	dek2_1Mocka_dir	OK	2.75725	2.19292	-0.330376	-0.415949	0.5274	0.818872	no	TRFL5	TRF-like 5
AT1G15730	AT1G15730	-	1:5406024-5409987	Col0Mockb_dir	dek2_1Mocka_dir	OK	10.0629	9.72242	-0.0496607	-0.163863	0.79735	0.935379	no	AT1G15730	Cobalamin biosynthesis CobW-like protein
AT1G15740	AT1G15740	-	1:5410907-5421033	Col0Mockb_dir	dek2_1Mocka_dir	OK	13.8317	14.8049	0.0980935	0.205227	0.75	0.920966	no	AT1G15740	Leucine-rich repeat family protein
AT1G15750	AT1G15750	-	1:5410907-5421033	Col0Mockb_dir	dek2_1Mocka_dir	OK	19.6292	17.8608	-0.136207	-0.438376	0.4964	0.801939	no	TPL	Transducin family protein / WD-40 repeat family protein
AT1G15757	AT1G15757	-	1:5424241-5424576	Col0Mockb_dir	dek2_1Mocka_dir	NOTEST	0	0	0	0	1	1	no	AT1G15757	Molecular chaperone Hsp40/DnaJ family protein
AT1G15760	AT1G15760	-	1:5425713-5426322	Col0Mockb_dir	dek2_1Mocka_dir	OK	3.84148	4.1377	0.107167	0.172465	0.7924	0.933803	no	AT1G15760	Sterile alpha motif (SAM) domain-containing protein
AT1G15770	AT1G15770	-	1:5426891-5428280	Col0Mockb_dir	dek2_1Mocka_dir	NOTEST	0.0223797	0.0901606	2.01031	0	1	1	no	AT1G15770	mediator of RNA polymerase II transcription subunit
AT1G15772	AT1G15772	-	1:5428519-5429561	Col0Mockb_dir	dek2_1Mocka_dir	NOTEST	0.228633	0.287994	0.333003	0	1	1	no	AT1G15772	mediator of RNA polymerase II transcription subunit
AT1G15780	AT1G15780	-	1:5430182-5436412	Col0Mockb_dir	dek2_1Mocka_dir	OK	4.78167	4.33269	-0.142251	-0.519836	0.42085	0.758633	no	NRB4	mediator of RNA polymerase II transcription subunit 15a-like protein
AT1G15790	AT1G15790	-	1:5438252-5440087	Col0Mockb_dir	dek2_1Mocka_dir	OK	0.924384	0.697259	-0.406797	-0.47182	0.48155	0.793902	no	AT1G15790	mediator of RNA polymerase II transcription subunit 15a-like protein
AT1G15800	AT1G15800	-	1:5441081-5443684	Col0Mockb_dir	dek2_1Mocka_dir	OK	1.29405	0.884616	-0.548776	-0.940946	0.15785	0.51255	no	AT1G15800	hypothetical protein
AT1G15810	AT1G15810	-	1:5444417-5447859	Col0Mockb_dir	dek2_1Mocka_dir	OK	14.4522	14.0039	-0.0454655	-0.00996042	0.98095	0.993912	no	AT1G15810	S15/NS1, RNA-binding protein
AT1G15820	AT1G15820	-	1:5444417-5447859	Col0Mockb_dir	dek2_1Mocka_dir	OK	3794.68	3185.81	-0.252317	-0.775859	0.26805	0.637276	no	LHCB6	light harvesting complex photosystem II subunit 6
AT1G15825	AT1G15825	-	1:5448148-5448529	Col0Mockb_dir	dek2_1Mocka_dir	OK	2.85431	3.73186	0.386752	0.433625	0.55905	0.833714	no	AT1G15825	hydroxyproline-rich glycoprotein family protein
AT1G15830	AT1G15830	-	1:5448725-5450177	Col0Mockb_dir	dek2_1Mocka_dir	OK	5.26162	4.92681	-0.094852	-0.368297	0.6766	0.888043	no	AT1G15830	hypothetical protein
AT1G15840	AT1G15840	-	1:5451431-5452374	Col0Mockb_dir	dek2_1Mocka_dir	NOTEST	0	0.0311972	inf	0	1	1	no	AT1G15840	hypothetical protein
AT1G15850	AT1G15850	-	1:5453244-5454088	Col0Mockb_dir	dek2_1Mocka_dir	NOTEST	0	0	0	0	1	1	no	AT1G15850	Transducin/WD40 repeat-like superfamily protein
AT1G15860	AT1G15860	-	1:5454784-5457022	Col0Mockb_dir	dek2_1Mocka_dir	OK	17.4778	18.0592	0.047212	0.173808	0.79165	0.933637	no	AT1G15860	defective in cullin neddylation protein (DUF298)
AT1G15870	AT1G15870	-	1:5457083-5458429	Col0Mockb_dir	dek2_1Mocka_dir	OK	1.55381	1.20589	-0.365714	-0.472262	0.46285	0.782322	no	AT1G15870	Mitochondrial glycoprotein family protein
AT1G15880	AT1G15880	-	1:5458534-5460333	Col0Mockb_dir	dek2_1Mocka_dir	OK	8.43039	6.92324	-0.284152	-0.82383	0.2038	0.571793	no	GOS11	golgi snare 11
AT1G15885	AT1G15885	-	1:5460476-5461281	Col0Mockb_dir	dek2_1Mocka_dir	OK	6.93107	5.09438	-0.444172	-0.827912	0.2098	0.577812	no	AT1G15885	hypothetical protein
AT1G15890	AT1G15890	-	1:5461316-5464223	Col0Mockb_dir	dek2_1Mocka_dir	OK	0.739125	0.748324	0.0178444	0.0265265	0.96875	0.990765	no	AT1G15890	Disease resistance protein (CC-NBS-LRR class) family
AT1G15900	AT1G15900	-	1:5464355-5464697	Col0Mockb_dir	dek2_1Mocka_dir	OK	0.992513	2.67543	1.43061	1.24935	0.1992	0.566118	no	AT1G15900	transmembrane protein
AT1G15910	AT1G15910	-	1:5465335-5469125	Col0Mockb_dir	dek2_1Mocka_dir	OK	5.50943	4.99595	-0.141144	-0.475447	0.4588	0.779937	no	FDM1	XH/XS domain-containing protein
AT1G15920	AT1G15920	-	1:5469388-5471149	Col0Mockb_dir	dek2_1Mocka_dir	OK	13.4761	11.4992	-0.228874	-0.763137	0.24335	0.611601	no	AT1G15920	Polynucleotidyl transferase, ribonuclease H-like superfamily protein
AT1G15930	AT1G15930	-	1:5471399-5473014	Col0Mockb_dir	dek2_1Mocka_dir	OK	119.775	129.778	0.115713	0.465825	0.4905	0.799011	no	AT1G15930	Ribosomal protein L7Ae/L30e/S12e/Gadd45 family protein
AT1G15940	AT1G15940	-	1:5473564-5478259	Col0Mockb_dir	dek2_1Mocka_dir	OK	9.25557	7.85627	-0.236477	-0.900987	0.1741	0.533923	no	AT1G15940	Tudor/PWWP/MBT superfamily protein
AT1G15950	AT1G15950	-	1:5478753-5485082	Col0Mockb_dir	dek2_1Mocka_dir	OK	7.34109	10.4135	0.504385	0.828104	0.20015	0.5673	no	CCR1	cinnamoyl coa reductase 1
AT1G15960	AT1G15960	-	1:5478753-5485082	Col0Mockb_dir	dek2_1Mocka_dir	OK	43.2961	38.0528	-0.186234	-0.651772	0.3137	0.675988	no	NRAMP6	NRAMP metal ion transporter 6
AT1G15970	AT1G15970	-	1:5486318-5488868	Col0Mockb_dir	dek2_1Mocka_dir	OK	10.118	7.63901	-0.405466	-1.36437	0.0324	0.251245	no	AT1G15970	DNA glycosylase superfamily protein
AT1G15980	AT1G15980	-	1:5489297-5493772	Col0Mockb_dir	dek2_1Mocka_dir	OK	36.2645	37.9891	0.0670285	0.25863	0.68445	0.891775	no	PnsB1	NDH-dependent cyclic electron flow 1
AT1G15990	AT1G15990	-	1:5489297-5493772	Col0Mockb_dir	dek2_1Mocka_dir	NOTEST	0.225311	0.176472	-0.352474	0	1	1	no	CNGC7	cyclic nucleotide gated channel 7
AT1G16000	AT1G16000	-	1:5494532-5495359	Col0Mockb_dir	dek2_1Mocka_dir	OK	19.7329	25.6716	0.379571	1.14393	0.0742	0.369554	no	AT1G16000	GAG1At protein
AT1G16010	AT1G16010	-	1:5495372-5497723	Col0Mockb_dir	dek2_1Mocka_dir	OK	13.7983	14.5084	0.0724019	0.264912	0.67995	0.889708	no	MGT2	magnesium transporter 2
AT1G16020	AT1G16020	-	1:5498164-5501358	Col0Mockb_dir	dek2_1Mocka_dir	OK	5.23058	4.52701	-0.208412	-0.638404	0.31785	0.679268	no	AT1G16020	vacuolar fusion protein (DUF1712)
AT1G16022	AT1G16022	-	1:5501395-5501959	Col0Mockb_dir	dek2_1Mocka_dir	OK	2.08196	1.11446	-0.901597	-0.718414	0.29395	0.660559	no	AT1G16022	transmembrane protein
AT1G16025	AT1G16025	-	1:5501395-5501959	Col0Mockb_dir	dek2_1Mocka_dir	OK	4.58604	3.78558	-0.276736	-0.3247	0.62765	0.869292	no	AT1G16025	hypothetical protein
AT1G16030	AT1G16030	-	1:5502205-5504535	Col0Mockb_dir	dek2_1Mocka_dir	OK	3.75555	2.28615	-0.716105	-1.94807	0.00455	0.0875611	no	Hsp70b	heat shock protein 70B
AT1G16040	AT1G16040	-	1:5504734-5506611	Col0Mockb_dir	dek2_1Mocka_dir	OK	5.04907	5.02529	-0.00680942	-0.0166064	0.97805	0.993806	no	AT1G16040	phosphatidylinositol-glycan biosynthesis class F-like protein
AT1G16060	AT1G16060	-	1:5508506-5511735	Col0Mockb_dir	dek2_1Mocka_dir	OK	7.81925	8.01906	0.0364023	0.124065	0.84735	0.952558	no	ADAP	ARIA-interacting double AP2 domain protein
AT1G16070	AT1G16070	-	1:5511872-5513896	Col0Mockb_dir	dek2_1Mocka_dir	OK	0.285821	0.589443	1.04424	1.03944	0.11385	0.447786	no	TLP8	tubby like protein 8
AT1G16080	AT1G16080	-	1:5514316-5516027	Col0Mockb_dir	dek2_1Mocka_dir	OK	57.9256	46.0362	-0.331433	-1.3099	0.05015	0.312176	no	AT1G16080	nuclear protein
AT1G16090	AT1G16090	-	1:5516258-5517822	Col0Mockb_dir	dek2_1Mocka_dir	OK	5.69096	5.27556	-0.109348	-0.285327	0.66365	0.88308	no	WAKL7	wall associated kinase-like 7
AT1G16110	AT1G16110	-	1:5518372-5520891	Col0Mockb_dir	dek2_1Mocka_dir	OK	1.454	1.69444	0.220777	0.441511	0.49765	0.802592	no	WAKL6	wall associated kinase-like 6
AT1G16120	AT1G16120	-	1:5522638-5524983	Col0Mockb_dir	dek2_1Mocka_dir	OK	0.503603	0.674568	0.421678	0.533574	0.4026	0.745416	no	WAKL1	wall associated kinase-like 1
AT1G16130	AT1G16130	-	1:5525490-5528212	Col0Mockb_dir	dek2_1Mocka_dir	OK	0.441526	1.13971	1.3681	2.04569	0.0142	0.168716	no	WAKL2	wall associated kinase-like 2
AT1G16150	AT1G16150	-	1:5532414-5534877	Col0Mockb_dir	dek2_1Mocka_dir	OK	0.572666	0.752724	0.394427	0.532927	0.3839	0.729421	no	WAKL4	wall associated kinase-like 4
AT1G16160	AT1G16160	-	1:5535972-5538269	Col0Mockb_dir	dek2_1Mocka_dir	NOTEST	0.103976	0.142062	0.450276	0	1	1	no	WAKL5	wall associated kinase-like 5
AT1G16170	AT1G16170	-	1:5538731-5539821	Col0Mockb_dir	dek2_1Mocka_dir	OK	30.2116	28.5479	-0.0817168	-0.286897	0.66555	0.884487	no	AT1G16170	ephrin-A3 protein
AT1G16180	AT1G16180	-	1:5540426-5542902	Col0Mockb_dir	dek2_1Mocka_dir	OK	65.2978	66.1794	0.0193472	0.0763586	0.90785	0.971124	no	AT1G16180	Serinc-domain containing serine and sphingolipid biosynthesis protein
AT1G16190	AT1G16190	-	1:5543151-5546103	Col0Mockb_dir	dek2_1Mocka_dir	OK	5.60665	4.90042	-0.194235	-0.596477	0.36365	0.713592	no	RAD23A	Rad23 UV excision repair protein family
AT1G16210	AT1G16210	-	1:5546127-5547552	Col0Mockb_dir	dek2_1Mocka_dir	OK	26.582	24.6574	-0.108426	-0.439401	0.5288	0.819677	no	AT1G16210	coiled-coil protein
AT1G16220	AT1G16220	-	1:5548652-5550553	Col0Mockb_dir	dek2_1Mocka_dir	OK	5.54602	4.77637	-0.215537	-0.593095	0.3567	0.7089	no	AT1G16220	Protein phosphatase 2C family protein
AT1G16225	AT1G16225	-	1:5551040-5552097	Col0Mockb_dir	dek2_1Mocka_dir	NOTEST	0	0	0	0	1	1	no	AT1G16225	Target SNARE coiled-coil domain protein
AT1G16230	AT1G16230	-	1:5553466-5554324	Col0Mockb_dir	dek2_1Mocka_dir	NOTEST	0	0.0815868	inf	0	1	1	no	AT1G16230	Target SNARE coiled-coil domain protein
AT1G16240	AT1G16240	-	1:5555006-5556841	Col0Mockb_dir	dek2_1Mocka_dir	OK	18.3106	19.7802	0.111379	0.397737	0.53525	0.822766	no	SYP51	syntaxin of plants 51
AT1G16250	AT1G16250	-	1:5556988-5559520	Col0Mockb_dir	dek2_1Mocka_dir	OK	5.29428	4.16089	-0.347544	-0.977436	0.12645	0.469379	no	AT1G16250	Galactose oxidase/kelch repeat superfamily protein
AT1G16260	AT1G16260	-	1:5559578-5562113	Col0Mockb_dir	dek2_1Mocka_dir	OK	11.2241	9.41477	-0.253605	-0.916129	0.1608	0.516903	no	AT1G16260	Wall-associated kinase family protein
AT1G16270	AT1G16270	-	1:5563086-5568368	Col0Mockb_dir	dek2_1Mocka_dir	OK	2.31267	3.18211	0.460427	1.40267	0.0318	0.248431	no	AT1G16270	kinase superfamily with octicosapeptide/Phox/Bem1p domain-containing protein
AT1G16280	AT1G16280	-	1:5568481-5570487	Col0Mockb_dir	dek2_1Mocka_dir	OK	0.889164	1.3106	0.559702	0.822662	0.19825	0.564564	no	RH36	RNA helicase 36
AT1G16290	AT1G16290	-	1:5570752-5573538	Col0Mockb_dir	dek2_1Mocka_dir	NOTEST	0.0712202	0	#NAME?	0	1	1	no	AT1G16290	transglycosylase
AT1G16300	AT1G16300	-	1:5574309-5577622	Col0Mockb_dir	dek2_1Mocka_dir	OK	3.1871	3.23449	0.0212905	0.0578951	0.92785	0.978039	no	GAPCP-2	glyceraldehyde-3-phosphate dehydrogenase of plastid 2
AT1G16310	AT1G16310	-	1:5578430-5580693	Col0Mockb_dir	dek2_1Mocka_dir	OK	4.33313	3.8893	-0.1559	-0.401641	0.53445	0.822361	no	AT1G16310	Cation efflux family protein
AT1G16320	AT1G16320	-	1:5580854-5582143	Col0Mockb_dir	dek2_1Mocka_dir	OK	93.8957	74.0353	-0.342846	-1.32665	0.0397	0.281873	no	AT1G16320	plant/protein (DUF2358)
AT1G16330	AT1G16330	-	1:5582386-5587391	Col0Mockb_dir	dek2_1Mocka_dir	NOTEST	0.1441	0.153469	0.0908811	0	1	1	no	CYCB3;1	cyclin b3;1
AT1G16340	AT1G16340	-	1:5587789-5590651	Col0Mockb_dir	dek2_1Mocka_dir	OK	0.319167	0.575573	0.850687	0.909799	0.14875	0.501538	no	ATKDSA2	Aldolase superfamily protein
AT1G16350	AT1G16350	-	1:5590950-5593007	Col0Mockb_dir	dek2_1Mocka_dir	OK	18.6045	19.9784	0.102788	0.387559	0.5511	0.82983	no	AT1G16350	Aldolase-type TIM barrel family protein
AT1G16360	AT1G16360	-	1:5593300-5595179	Col0Mockb_dir	dek2_1Mocka_dir	NOTEST	0.0753614	0.248404	1.72079	0	1	1	no	AT1G16360	LEM3 (ligand-effect modulator 3) family protein / CDC50 family protein
AT1G16370	AT1G16370	-	1:5596693-5598447	Col0Mockb_dir	dek2_1Mocka_dir	OK	1.02168	1.24598	0.286341	0.397937	0.54255	0.825864	no	2024-10-06	organic cation/carnitine transporter 6
AT1G16380	AT1G16380	-	1:5598452-5601367	Col0Mockb_dir	dek2_1Mocka_dir	NOTEST	0	0	0	0	1	1	no	ATCHX1	Cation/hydrogen exchanger family protein
AT1G16390	AT1G16390	-	1:5602872-5604663	Col0Mockb_dir	dek2_1Mocka_dir	OK	6.88803	7.54814	0.132031	0.389857	0.5421	0.825864	no	2024-10-03	organic cation/carnitine transporter 3
AT1G16400	AT1G16400	-	1:5605158-5607473	Col0Mockb_dir	dek2_1Mocka_dir	OK	15.0669	17.8434	0.244012	0.909437	0.1639	0.520489	no	CYP79F2	cytochrome P450, family 79, subfamily F, polypeptide 2
AT1G16410	AT1G16410	-	1:5608806-5611426	Col0Mockb_dir	dek2_1Mocka_dir	OK	42.2091	41.9277	-0.00965037	-0.0373628	0.9542	0.986665	no	CYP79F1	cytochrome p450 79f1
AT1G16420	AT1G16420	-	1:5612149-5613867	Col0Mockb_dir	dek2_1Mocka_dir	OK	0.444542	0.805886	0.858256	0.932791	0.14345	0.494551	no	MC8	metacaspase 8
AT1G16430	AT1G16430	-	1:5614618-5615510	Col0Mockb_dir	dek2_1Mocka_dir	OK	6.3648	5.76852	-0.141913	-0.300453	0.6402	0.875601	no	AT1G16430	Surfeit locus protein 5 subunit 22 of Mediator complex
AT1G16440	AT1G16440	-	1:5615814-5617672	Col0Mockb_dir	dek2_1Mocka_dir	OK	0.49256	0.814743	0.726044	0.875595	0.20355	0.571494	no	RSH3	root hair specific 3
AT1G16445	AT1G16445	-	1:5617810-5619334	Col0Mockb_dir	dek2_1Mocka_dir	OK	1.78644	1.10248	-0.696338	-0.963377	0.148	0.500709	no	AT1G16445	S-adenosyl-L-methionine-dependent methyltransferases superfamily protein
AT1G16460	AT1G16460	-	1:5619581-5622663	Col0Mockb_dir	dek2_1Mocka_dir	OK	11.3685	9.19472	-0.306167	-1.08354	0.09765	0.419851	no	RDH2	rhodanese homologue 2
AT1G16470	AT1G16470	-	1:5622785-5625643	Col0Mockb_dir	dek2_1Mocka_dir	OK	7.58942	7.42785	-0.0310449	-0.10161	0.87285	0.960058	no	PAB1	proteasome subunit PAB1
AT1G16480	AT1G16480	-	1:5625698-5628656	Col0Mockb_dir	dek2_1Mocka_dir	OK	1.36544	1.12564	-0.278613	-0.538303	0.4122	0.751741	no	AT1G16480	Tetratricopeptide repeat (TPR)-like superfamily protein
AT1G16490	AT1G16490	-	1:5629654-5630995	Col0Mockb_dir	dek2_1Mocka_dir	OK	2.22611	2.32177	0.0606982	0.106254	0.8708	0.959648	no	MYB58	myb domain protein 58
AT1G16500	AT1G16500	-	1:5639031-5640173	Col0Mockb_dir	dek2_1Mocka_dir	OK	4.96399	4.63035	-0.100379	-0.228807	0.72845	0.911154	no	AT1G16500	filamentous hemagglutinin transporter
AT1G16510	AT1G16510	-	1:5644571-5645443	Col0Mockb_dir	dek2_1Mocka_dir	OK	7.31301	9.0182	0.302374	0.755252	0.2879	0.656248	no	AT1G16510	SAUR-like auxin-responsive protein family
AT1G16515	AT1G16515	-	1:5647548-5647813	Col0Mockb_dir	dek2_1Mocka_dir	OK	7.62834	8.43772	0.145483	0.132254	0.8323	0.947554	no	AT1G16515	transmembrane protein
AT1G16520	AT1G16520	-	1:5648759-5651167	Col0Mockb_dir	dek2_1Mocka_dir	OK	3.95538	3.83038	-0.0463287	-0.122303	0.8475	0.952566	no	AT1G16520	interactor of constitutive active ROPs protein
AT1G16530	AT1G16530	-	1:5651369-5652883	Col0Mockb_dir	dek2_1Mocka_dir	OK	3.77704	5.93476	0.651935	1.44679	0.0273	0.229267	no	ASL9	ASYMMETRIC LEAVES 2-like 9
AT1G16540	AT1G16540	-	1:5659414-5665449	Col0Mockb_dir	dek2_1Mocka_dir	OK	1.65178	1.29646	-0.349444	-0.878142	0.17475	0.535328	no	ABA3	molybdenum cofactor sulfurase (LOS5) (ABA3)
AT1G16560	AT1G16560	-	1:5668383-5673600	Col0Mockb_dir	dek2_1Mocka_dir	OK	27.4074	22.9955	-0.253214	-0.952746	0.1457	0.496635	no	AT1G16560	Per1-like family protein
AT1G16570	AT1G16570	-	1:5668383-5673600	Col0Mockb_dir	dek2_1Mocka_dir	OK	1.27918	1.02422	-0.320696	-0.267652	0.68345	0.891775	no	AT1G16570	UDP-Glycosyltransferase superfamily protein
AT1G16590	AT1G16590	-	1:5673794-5675131	Col0Mockb_dir	dek2_1Mocka_dir	OK	3.88001	2.77032	-0.486004	-0.978613	0.13975	0.490787	no	REV7	DNA-binding HORMA family protein
AT1G16610	AT1G16610	-	1:5675703-5678852	Col0Mockb_dir	dek2_1Mocka_dir	OK	9.05569	7.38282	-0.294651	-1.08322	0.1187	0.456065	no	SR45	arginine/serine-rich 45
AT1G16630	AT1G16630	-	1:5682117-5684867	Col0Mockb_dir	dek2_1Mocka_dir	OK	2.62807	3.92021	0.576926	1.61218	0.0153	0.175712	no	AT1G16630	transmembrane protein
AT1G16640	AT1G16640	-	1:5686602-5687715	Col0Mockb_dir	dek2_1Mocka_dir	OK	3.21299	3.01783	-0.090405	-0.146476	0.8175	0.941348	no	AT1G16640	AP2/B3-like transcriptional factor family protein
AT1G16650	AT1G16650	-	1:5687942-5691198	Col0Mockb_dir	dek2_1Mocka_dir	OK	1.80579	2.20925	0.290926	0.652899	0.31855	0.679889	no	AT1G16650	S-adenosyl-L-methionine-dependent methyltransferases superfamily protein
AT1G16670	AT1G16670	-	1:5697323-5699769	Col0Mockb_dir	dek2_1Mocka_dir	OK	4.74238	3.864	-0.295514	-0.794616	0.2157	0.583499	no	AT1G16670	Protein kinase superfamily protein
AT1G16680	AT1G16680	-	1:5702752-5705838	Col0Mockb_dir	dek2_1Mocka_dir	OK	11.0315	8.26741	-0.41612	-1.45726	0.0256	0.221426	no	AT1G16680	Chaperone DnaJ-domain superfamily protein
AT1G16690	AT1G16690	-	1:5705968-5709533	Col0Mockb_dir	dek2_1Mocka_dir	OK	3.89104	3.06705	-0.343303	-0.982423	0.12575	0.468175	no	AT1G16690	Enhancer of polycomb-like transcription factor protein
AT1G16700	AT1G16700	-	1:5709724-5711902	Col0Mockb_dir	dek2_1Mocka_dir	OK	35.1106	26.8397	-0.387535	-1.48278	0.02085	0.201204	no	AT1G16700	Alpha-helical ferredoxin
AT1G16705	AT1G16705	-	1:5712087-5713752	Col0Mockb_dir	dek2_1Mocka_dir	NOTEST	0.3784	0.196268	-0.947086	0	1	1	no	AT1G16705	p300/CBP acetyltransferase-related protein-like protein
AT1G16710	AT1G16710	-	1:5714218-5722614	Col0Mockb_dir	dek2_1Mocka_dir	OK	3.11588	2.9465	-0.0806396	-0.282247	0.66845	0.885802	no	HAC12	histone acetyltransferase of the CBP family 12
AT1G16720	AT1G16720	-	1:5723087-5727312	Col0Mockb_dir	dek2_1Mocka_dir	OK	15.6159	17.7932	0.188311	0.651868	0.30825	0.672089	no	HCF173	high chlorophyll fluorescence phenotype 173
AT1G16730	AT1G16730	-	1:5723087-5727312	Col0Mockb_dir	dek2_1Mocka_dir	OK	15.7368	13.4103	-0.230802	-0.398614	0.5803	0.844311	no	UP6	hypothetical protein
AT1G16740	AT1G16740	-	1:5727689-5729080	Col0Mockb_dir	dek2_1Mocka_dir	OK	37.558	38.7501	0.0450805	0.167796	0.79405	0.934532	no	AT1G16740	Ribosomal protein L20
AT1G16750	AT1G16750	-	1:5729096-5731870	Col0Mockb_dir	dek2_1Mocka_dir	OK	3.19042	3.15512	-0.0160471	-0.0421451	0.94835	0.984959	no	AT1G16750	GPI-anchored adhesin-like protein, putative (Protein of unknown function, DUF547)
AT1G16760	AT1G16760	-	1:5734233-5737307	Col0Mockb_dir	dek2_1Mocka_dir	NOTEST	0	0.00562514	inf	0	1	1	no	AT1G16760	kinase with adenine nucleotide alpha hydrolases-like domain-containing protein
AT1G16770	AT1G16770	-	1:5737877-5744214	Col0Mockb_dir	dek2_1Mocka_dir	NOTEST	0.32806	0.358162	0.126656	0	1	1	no	AT1G16770	hypothetical protein
AT1G16780	AT1G16780	-	1:5737877-5744214	Col0Mockb_dir	dek2_1Mocka_dir	OK	2.38998	2.11753	-0.174621	-0.483611	0.4586	0.77973	no	VHP2;2	Inorganic H pyrophosphatase family protein
AT1G16790	AT1G16790	-	1:5744552-5745209	Col0Mockb_dir	dek2_1Mocka_dir	OK	25.862	19.914	-0.377051	-1.28104	0.0673	0.352909	no	AT1G16790	ribosomal protein-like protein
AT1G16800	AT1G16800	-	1:5745522-5755263	Col0Mockb_dir	dek2_1Mocka_dir	OK	0.772871	0.662205	-0.222949	-0.538094	0.39525	0.739568	no	AT1G16800	P-loop containing nucleoside triphosphate hydrolases superfamily protein
AT1G16810	AT1G16810	-	1:5755587-5758464	Col0Mockb_dir	dek2_1Mocka_dir	OK	57.0162	67.4204	0.241815	0.912649	0.15425	0.507538	no	AT1G16810	7-dehydrocholesterol reductase-like protein
AT1G16820	AT1G16820	-	1:5755587-5758464	Col0Mockb_dir	dek2_1Mocka_dir	OK	3.71783	2.64345	-0.49204	-0.415896	0.5284	0.819389	no	AT1G16820	vacuolar ATP synthase catalytic subunit-related / V-ATPase-related / vacuolar proton pump-like protein
AT1G16825	AT1G16825	-	1:5758854-5760501	Col0Mockb_dir	dek2_1Mocka_dir	OK	1.57998	1.59735	0.0157793	0.0236227	0.97155	0.991443	no	AT1G16825	Reticulon family protein
AT1G16830	AT1G16830	-	1:5760771-5762619	Col0Mockb_dir	dek2_1Mocka_dir	OK	1.39889	1.03765	-0.430964	-0.63106	0.3245	0.684419	no	AT1G16830	Pentatricopeptide repeat (PPR) superfamily protein
AT1G16840	AT1G16840	-	1:5762693-5764073	Col0Mockb_dir	dek2_1Mocka_dir	OK	15.7675	15.1982	-0.0530543	-0.178811	0.7909	0.93315	no	AT1G16840	hypothetical protein
AT1G16850	AT1G16850	-	1:5764806-5765651	Col0Mockb_dir	dek2_1Mocka_dir	OK	4.66717	4.04521	-0.206334	-0.404823	0.55975	0.834123	no	AT1G16850	transmembrane protein
AT1G16860	AT1G16860	-	1:5767299-5770602	Col0Mockb_dir	dek2_1Mocka_dir	OK	13.1035	11.9073	-0.138111	-0.52261	0.42535	0.761649	no	AT1G16860	Ubiquitin-specific protease family C19-related protein
AT1G16870	AT1G16870	-	1:5770731-5773251	Col0Mockb_dir	dek2_1Mocka_dir	OK	9.39931	7.9026	-0.250228	-0.846799	0.18835	0.552063	no	AT1G16870	mitochondrial 28S ribosomal protein S29-like protein
AT1G16880	AT1G16880	-	1:5773591-5778484	Col0Mockb_dir	dek2_1Mocka_dir	OK	22.8333	27.2533	0.255293	0.822187	0.20265	0.570593	no	ACR11	uridylyltransferase-like protein
AT1G16890	AT1G16890	-	1:5773591-5778484	Col0Mockb_dir	dek2_1Mocka_dir	OK	15.4826	13.3059	-0.218583	-0.471634	0.47115	0.78803	no	UBC36	ubiquitin-conjugating enzyme 36
AT1G16900	AT1G16900	-	1:5779020-5782433	Col0Mockb_dir	dek2_1Mocka_dir	OK	3.53659	3.65767	0.0485651	0.137076	0.8352	0.948789	no	EBS3	Alg9-like mannosyltransferase family
AT1G16905	AT1G16905	-	1:5782454-5783840	Col0Mockb_dir	dek2_1Mocka_dir	NOTEST	0.409856	0.334793	-0.291848	0	1	1	no	AT1G16905	Curculin-like (mannose-binding) lectin family protein
AT1G16910	AT1G16910	-	1:5785002-5785927	Col0Mockb_dir	dek2_1Mocka_dir	NOTEST	0.0965572	0.180883	0.905605	0	1	1	no	LSH8	LIGHT-DEPENDENT SHORT HYPOCOTYLS-like protein (DUF640)
AT1G16916	AT1G16916	-	1:5786559-5787112	Col0Mockb_dir	dek2_1Mocka_dir	OK	23.4145	18.6103	-0.331302	-0.963654	0.16605	0.523405	no	AT1G16916	transmembrane protein
AT1G16920	AT1G16920	-	1:5787329-5789249	Col0Mockb_dir	dek2_1Mocka_dir	OK	34.215	33.8995	-0.013365	-0.0516012	0.9357	0.980194	no	RABA1b	RAB GTPase homolog A1B
AT1G16930	AT1G16930	-	1:5789986-5791534	Col0Mockb_dir	dek2_1Mocka_dir	OK	2.09618	2.95707	0.496405	0.851693	0.17855	0.540749	no	AT1G16930	F-box/RNI-like/FBD-like domains-containing protein
AT1G16940	AT1G16940	-	1:5791982-5793491	Col0Mockb_dir	dek2_1Mocka_dir	NOTEST	0	0	0	0	1	1	no	AT1G16940	F-box/RNI-like/FBD-like domains-containing protein
AT1G16950	AT1G16950	-	1:5796008-5796559	Col0Mockb_dir	dek2_1Mocka_dir	NOTEST	0	0	0	0	1	1	no	AT1G16950	transmembrane protein
AT1G16960	AT1G16960	-	1:5799887-5805799	Col0Mockb_dir	dek2_1Mocka_dir	OK	8.09692	8.88476	0.13396	0.239261	0.70625	0.901787	no	AT1G16960	Ubiquitin domain-containing protein
AT1G16970	AT1G16970	-	1:5799887-5805799	Col0Mockb_dir	dek2_1Mocka_dir	OK	3.38361	2.47253	-0.452578	-1.12896	0.0836	0.391896	no	KU70	ATP-dependent DNA helicase 2 subunit Ku70-like protein
AT1G16980	AT1G16980	-	1:5807310-5811488	Col0Mockb_dir	dek2_1Mocka_dir	NOTEST	0	0.00343739	inf	0	1	1	no	TPS2	trehalose-6-phosphate synthase
AT1G17000	AT1G17000	-	1:5812727-5816662	Col0Mockb_dir	dek2_1Mocka_dir	NOTEST	0	0.0165684	inf	0	1	1	no	TPS3	trehalose-phosphatase/synthase 3
AT1G17010	AT1G17010	-	1:5817566-5819352	Col0Mockb_dir	dek2_1Mocka_dir	NOTEST	0	0	0	0	1	1	no	AT1G17010	2-oxoglutarate (2OG) and Fe(II)-dependent oxygenase superfamily protein
AT1G17020	AT1G17020	-	1:5820205-5822013	Col0Mockb_dir	dek2_1Mocka_dir	OK	2.18362	3.17371	0.53945	1.08879	0.09545	0.415409	no	SRG1	senescence-related gene 1
AT1G17030	AT1G17030	-	1:5822367-5824455	Col0Mockb_dir	dek2_1Mocka_dir	OK	0.489215	0.592172	0.275549	0.318481	0.61975	0.8651	no	AT1G17030	hypothetical protein
AT1G17040	AT1G17040	-	1:5824847-5828233	Col0Mockb_dir	dek2_1Mocka_dir	OK	1.54289	1.86792	0.275795	0.590542	0.3493	0.702582	no	SHA	SH2 domain protein A
AT1G17050	AT1G17050	-	1:5829079-5831343	Col0Mockb_dir	dek2_1Mocka_dir	OK	63.5818	60.7925	-0.0647195	-0.24983	0.6959	0.897461	no	SPS2	solanesyl diphosphate synthase 2
AT1G17060	AT1G17060	-	1:5832096-5835456	Col0Mockb_dir	dek2_1Mocka_dir	OK	3.59438	4.43484	0.303141	0.862341	0.18085	0.543177	no	CYP72C1	cytochrome p450 72c1
AT1G17070	AT1G17070	-	1:5837589-5841606	Col0Mockb_dir	dek2_1Mocka_dir	OK	4.00158	3.48697	-0.198597	-0.477372	0.47885	0.792829	no	STIPL1	GC-rich sequence DNA-binding factor-like protein with Tuftelin interacting domain-containing protein
AT1G17080	AT1G17080	-	1:5837589-5841606	Col0Mockb_dir	dek2_1Mocka_dir	OK	12.478	16.1836	0.375148	0.969604	0.1394	0.490335	no	AT1G17080	Ribosomal protein L18ae family
AT1G17090	AT1G17090	-	1:5842215-5844283	Col0Mockb_dir	dek2_1Mocka_dir	OK	5.38317	5.09267	-0.0800325	-0.202751	0.75335	0.921444	no	AT1G17090	transmembrane protein
AT1G17100	AT1G17100	-	1:5844675-5850934	Col0Mockb_dir	dek2_1Mocka_dir	OK	253.484	193.838	-0.387038	-1.40317	0.0441	0.296034	no	HBP1	SOUL heme-binding family protein
AT1G17110	AT1G17110	-	1:5844675-5850934	Col0Mockb_dir	dek2_1Mocka_dir	OK	10.1653	9.20991	-0.14239	-0.222855	0.72945	0.911224	no	UBP15	ubiquitin-specific protease 15
AT1G17120	AT1G17120	-	1:5851952-5853955	Col0Mockb_dir	dek2_1Mocka_dir	OK	9.32606	11.2437	0.269775	0.905322	0.16495	0.521753	no	CAT8	cationic amino acid transporter 8
AT1G17130	AT1G17130	-	1:5854147-5858550	Col0Mockb_dir	dek2_1Mocka_dir	OK	12.7768	12.317	-0.052881	-0.0951296	0.88015	0.961141	no	AT1G17130	coiled-coil protein (DUF572)
AT1G17140	AT1G17140	-	1:5854147-5858550	Col0Mockb_dir	dek2_1Mocka_dir	OK	44.6019	31.3351	-0.509325	-1.66843	0.01105	0.147459	no	ICR1	interactor of constitutive active rops 1
AT1G17145	AT1G17145	-	1:5860118-5862682	Col0Mockb_dir	dek2_1Mocka_dir	OK	10.7092	9.58737	-0.159645	-0.540748	0.40385	0.746252	no	AT1G17145	RING/U-box superfamily protein
AT1G17147	AT1G17147	-	1:5863430-5864009	Col0Mockb_dir	dek2_1Mocka_dir	OK	10.6839	13.1417	0.298714	0.67772	0.3221	0.68367	no	AT1G17147	VQ motif-containing protein
AT1G17150	AT1G17150	-	1:5865706-5867495	Col0Mockb_dir	dek2_1Mocka_dir	NOTEST	0	0	0	0	1	1	no	AT1G17150	Pectin lyase-like superfamily protein
AT1G17160	AT1G17160	-	1:5867634-5869356	Col0Mockb_dir	dek2_1Mocka_dir	OK	5.25376	5.34643	0.0252259	0.0720139	0.9149	0.973598	no	AT1G17160	pfkB-like carbohydrate kinase family protein
AT1G17170	AT1G17170	-	1:5869845-5870840	Col0Mockb_dir	dek2_1Mocka_dir	OK	73.7273	79.8931	0.115873	0.469832	0.4919	0.79987	no	GSTU24	glutathione S-transferase TAU 24
AT1G17180	AT1G17180	-	1:5872144-5873086	Col0Mockb_dir	dek2_1Mocka_dir	OK	75.0872	94.2668	0.328184	1.30876	0.0501	0.312176	no	GSTU25	glutathione S-transferase TAU 25
AT1G17190	AT1G17190	-	1:5875349-5876545	Col0Mockb_dir	dek2_1Mocka_dir	OK	22.06	34.1732	0.631429	2.23137	0.00065	0.0234341	yes	GSTU26	glutathione S-transferase tau 26
AT1G17200	AT1G17200	-	1:5878399-5880041	Col0Mockb_dir	dek2_1Mocka_dir	OK	23.3987	27.173	0.215742	0.792213	0.226	0.594716	no	AT1G17200	Uncharacterized protein family (UPF0497)
AT1G17210	AT1G17210	-	1:5880129-5884756	Col0Mockb_dir	dek2_1Mocka_dir	OK	7.26126	7.11564	-0.0292256	-0.107423	0.8677	0.958892	no	ILP1	IAP-like protein 1
AT1G17220	AT1G17220	-	1:5885082-5890470	Col0Mockb_dir	dek2_1Mocka_dir	OK	31.6218	36.7521	0.216907	0.834436	0.19275	0.559042	no	FUG1	Translation initiation factor 2, small GTP-binding protein
AT1G17230	AT1G17230	-	1:5891323-5895075	Col0Mockb_dir	dek2_1Mocka_dir	OK	1.34021	1.58028	0.237723	0.525757	0.4079	0.749176	no	AT1G17230	Leucine-rich receptor-like protein kinase family protein
AT1G17235	AT1G17235	-	1:5895350-5895710	Col0Mockb_dir	dek2_1Mocka_dir	NOTEST	0	0	0	0	1	1	no	RTFL11	ROTUNDIFOLIA like 11
AT1G17240	AT1G17240	-	1:5896415-5898717	Col0Mockb_dir	dek2_1Mocka_dir	NOTEST	0.467294	0.473379	0.0186646	0	1	1	no	RLP2	receptor like protein 2
AT1G17250	AT1G17250	-	1:5901168-5903439	Col0Mockb_dir	dek2_1Mocka_dir	OK	2.30795	1.40901	-0.711927	-1.40989	0.03875	0.277758	no	RLP3	receptor like protein 3
AT1G17260	AT1G17260	-	1:5904057-5908898	Col0Mockb_dir	dek2_1Mocka_dir	NOTEST	0.087875	0.167984	0.934799	0	1	1	no	AHA10	autoinhibited H[ ]-ATPase isoform 10
AT1G17270	AT1G17270	-	1:5909248-5911693	Col0Mockb_dir	dek2_1Mocka_dir	OK	2.07238	2.08376	0.00789884	0.0167523	0.98005	0.993859	no	AT1G17270	O-fucosyltransferase family protein
AT1G17280	AT1G17280	-	1:5916870-5920089	Col0Mockb_dir	dek2_1Mocka_dir	OK	14.452	14.7341	0.0278861	0.10369	0.87375	0.96009	no	UBC34	ubiquitin-conjugating enzyme 34
AT1G17285	AT1G17285	-	1:5920773-5921415	Col0Mockb_dir	dek2_1Mocka_dir	OK	10.4121	12.6721	0.283393	0.677839	0.31745	0.679214	no	AT1G17285	transmembrane protein
AT1G17290	AT1G17290	-	1:5922629-5926400	Col0Mockb_dir	dek2_1Mocka_dir	OK	18.3555	19.4282	0.0819369	0.319633	0.62035	0.865313	no	AlaAT1	alanine aminotransferas
AT1G17300	AT1G17300	-	1:5926993-5927784	Col0Mockb_dir	dek2_1Mocka_dir	OK	3.25867	5.63407	0.789896	1.2787	0.04685	0.3049	no	AT1G17300	hypothetical protein
AT1G17310	AT1G17310	-	1:5928013-5928667	Col0Mockb_dir	dek2_1Mocka_dir	NOTEST	0.414522	0.189247	-1.13118	0	1	1	no	AT1G17310	MADS-box transcription factor family protein
AT1G17330	AT1G17330	-	1:5929908-5931831	Col0Mockb_dir	dek2_1Mocka_dir	OK	5.41126	4.25609	-0.346436	-0.9095	0.161	0.516903	no	AT1G17330	Metal-dependent phosphohydrolase
AT1G17340	AT1G17340	-	1:5933869-5938761	Col0Mockb_dir	dek2_1Mocka_dir	OK	2.5587	2.29421	-0.157419	-0.447386	0.49365	0.800786	no	AT1G17340	Phosphoinositide phosphatase family protein
AT1G17345	AT1G17345	-	1:5940422-5941210	Col0Mockb_dir	dek2_1Mocka_dir	NOTEST	0.274009	0.4599	0.747096	0	1	1	no	AT1G17345	SAUR-like auxin-responsive protein family
AT1G17350	AT1G17350	-	1:5941783-5944463	Col0Mockb_dir	dek2_1Mocka_dir	OK	5.70731	4.75846	-0.262318	-0.756222	0.24295	0.611269	no	AT1G17350	NADH:ubiquinone oxidoreductase intermediate-associated protein 30
AT1G17360	AT1G17360	-	1:5946763-5951473	Col0Mockb_dir	dek2_1Mocka_dir	OK	10.4558	11.4401	0.129804	0.496	0.44695	0.773186	no	AT1G17360	LOW protein: protein phosphatase 1 regulatory subunit-like protein
AT1G17370	AT1G17370	-	1:5951541-5955037	Col0Mockb_dir	dek2_1Mocka_dir	OK	27.9455	22.6036	-0.306067	-1.19288	0.069	0.356276	no	UBP1B	oligouridylate binding protein 1B
AT1G17380	AT1G17380	-	1:5955487-5957212	Col0Mockb_dir	dek2_1Mocka_dir	OK	0.503681	1.11732	1.14946	1.31538	0.05035	0.31233	no	JAZ5	jasmonate-zim-domain protein 5
AT1G17400	AT1G17400	-	1:5960480-5962481	Col0Mockb_dir	dek2_1Mocka_dir	NOTEST	0.0399038	0.197187	2.30497	0	1	1	no	AT1G17400	hypothetical protein
AT1G17410	AT1G17410	-	1:5968533-5969995	Col0Mockb_dir	dek2_1Mocka_dir	OK	1.81821	1.71862	-0.0812687	-0.124888	0.8463	0.952257	no	AT1G17410	Nucleoside diphosphate kinase family protein
AT1G17420	AT1G17420	-	1:5977410-5981480	Col0Mockb_dir	dek2_1Mocka_dir	OK	2.38511	2.40885	0.0142844	0.0404686	0.9492	0.985122	no	LOX3	lipoxygenase 3
AT1G17430	AT1G17430	-	1:5982266-5987784	Col0Mockb_dir	dek2_1Mocka_dir	OK	2.34857	2.07359	-0.179654	-0.230178	0.72105	0.908352	no	AT1G17430	alpha/beta-Hydrolases superfamily protein
AT1G17440	AT1G17440	-	1:5982266-5987784	Col0Mockb_dir	dek2_1Mocka_dir	OK	4.60756	4.22935	-0.123566	-0.377728	0.5601	0.834458	no	EER4	Transcription initiation factor TFIID subunit A
AT1G17450	AT1G17450	-	1:5988279-5996785	Col0Mockb_dir	dek2_1Mocka_dir	OK	1.65148	1.73698	0.0728179	0.22053	0.7326	0.91258	no	AT1G17450	B-block binding subunit of TFIIIC
AT1G17455	AT1G17455	-	1:5997179-5998475	Col0Mockb_dir	dek2_1Mocka_dir	OK	7.64223	7.14508	-0.0970432	-0.238815	0.7147	0.905272	no	ELF4-L4	ELF4-like 4
AT1G17460	AT1G17460	-	1:5998813-6002716	Col0Mockb_dir	dek2_1Mocka_dir	OK	0.451188	0.753608	0.740086	1.06897	0.1002	0.424588	no	TRFL3	TRF-like 3
AT1G17470	AT1G17470	-	1:6002911-6006405	Col0Mockb_dir	dek2_1Mocka_dir	OK	10.5874	10.0684	-0.0725067	-0.26319	0.68445	0.891775	no	DRG1	developmentally regulated G-protein 1
AT1G17480	AT1G17480	-	1:6006460-6008266	Col0Mockb_dir	dek2_1Mocka_dir	OK	2.57148	2.82868	0.137532	0.287139	0.66085	0.881944	no	IQD7	IQ-domain 7
AT1G17490	AT1G17490	-	1:6008588-6009420	Col0Mockb_dir	dek2_1Mocka_dir	OK	18.9623	21.8073	0.201677	0.585597	0.35685	0.7089	no	AT1G17490	epidermal patterning factor-like protein
AT1G17500	AT1G17500	-	1:6018756-6023503	Col0Mockb_dir	dek2_1Mocka_dir	OK	5.01558	4.80538	-0.0617661	-0.211885	0.73815	0.915262	no	AT1G17500	ATPase E1-E2 type family protein / haloacid dehalogenase-like hydrolase family protein
AT1G17510	AT1G17510	-	1:6023503-6024309	Col0Mockb_dir	dek2_1Mocka_dir	OK	5.7834	9.06109	0.647767	1.39676	0.03525	0.263016	no	AT1G17510	hypothetical protein
AT1G17520	AT1G17520	-	1:6024635-6027385	Col0Mockb_dir	dek2_1Mocka_dir	OK	3.14515	3.22896	0.0379381	0.0971284	0.87895	0.960516	no	AT1G17520	Homeodomain-like/winged-helix DNA-binding family protein
AT1G17530	AT1G17530	-	1:6027630-6028506	Col0Mockb_dir	dek2_1Mocka_dir	OK	30.0339	26.2496	-0.194296	-0.719751	0.29995	0.665676	no	TIM23-1	translocase of inner mitochondrial membrane 23
AT1G17540	AT1G17540	-	1:6029276-6032754	Col0Mockb_dir	dek2_1Mocka_dir	NOTEST	0.112055	0.021106	-2.40848	0	1	1	no	AT1G17540	kinase with adenine nucleotide alpha hydrolases-like domain-containing protein
AT1G17545	AT1G17545	-	1:6033108-6033908	Col0Mockb_dir	dek2_1Mocka_dir	NOTEST	0	0	0	0	1	1	no	AT1G17545	Protein phosphatase 2C family protein
AT1G17550	AT1G17550	-	1:6034361-6037289	Col0Mockb_dir	dek2_1Mocka_dir	OK	14.2079	12.5529	-0.178673	-0.658447	0.30945	0.673086	no	HAB2	homology to ABI2
AT1G17560	AT1G17560	-	1:6037463-6038692	Col0Mockb_dir	dek2_1Mocka_dir	OK	13.2976	18.3988	0.46845	1.48105	0.02165	0.204832	no	HLL	Ribosomal protein L14p/L23e family protein
AT1G17580	AT1G17580	-	1:6039302-6049556	Col0Mockb_dir	dek2_1Mocka_dir	OK	2.57982	1.91491	-0.429993	-1.44115	0.02525	0.219829	no	MYA1	myosin 1
AT1G17590	AT1G17590	-	1:6050192-6052568	Col0Mockb_dir	dek2_1Mocka_dir	OK	7.45814	4.78559	-0.640121	-1.87262	0.00485	0.0913073	no	NF-YA8	nuclear factor Y, subunit A8
AT1G17600	AT1G17600	-	1:6052935-6056664	Col0Mockb_dir	dek2_1Mocka_dir	OK	0.721839	1.01715	0.494788	0.869443	0.16835	0.526567	no	AT1G17600	Disease resistance protein (TIR-NBS-LRR class) family
AT1G17610	AT1G17610	-	1:6056894-6058357	Col0Mockb_dir	dek2_1Mocka_dir	OK	1.83665	1.43348	-0.357559	-0.557395	0.4011	0.74439	no	AT1G17610	Disease resistance protein (TIR-NBS class)
AT1G17615	AT1G17615	-	1:6059440-6060667	Col0Mockb_dir	dek2_1Mocka_dir	NOTEST	0	0	0	0	1	1	no	AT1G17615	Disease resistance protein (TIR-NBS class)
AT1G17620	AT1G17620	-	1:6062215-6063291	Col0Mockb_dir	dek2_1Mocka_dir	OK	53.6706	47.0707	-0.189302	-0.808406	0.26345	0.632439	no	AT1G17620	Late embryogenesis abundant (LEA) hydroxyproline-rich glycoprotein family
AT1G17630	AT1G17630	-	1:6064524-6066720	Col0Mockb_dir	dek2_1Mocka_dir	OK	0.226854	0.484476	1.09466	0.958831	0.14185	0.493296	no	AT1G17630	Pentatricopeptide repeat (PPR-like) superfamily protein
AT1G17640	AT1G17640	-	1:6067393-6069098	Col0Mockb_dir	dek2_1Mocka_dir	OK	2.36759	1.82683	-0.374074	-0.65921	0.31045	0.673679	no	AT1G17640	RNA-binding (RRM/RBD/RNP motifs) family protein
AT1G17650	AT1G17650	-	1:6069476-6072012	Col0Mockb_dir	dek2_1Mocka_dir	OK	12.7826	11.3101	-0.176572	-0.624059	0.33995	0.695422	no	GLYR2	glyoxylate reductase 2
AT1G17665	AT1G17665	-	1:6072252-6074484	Col0Mockb_dir	dek2_1Mocka_dir	NOTEST	0.262733	0.252419	-0.0577811	0	1	1	no	AT1G17665	CA-responsive protein
AT1G17680	AT1G17680	-	1:6076076-6082337	Col0Mockb_dir	dek2_1Mocka_dir	OK	3.03978	3.10392	0.0301207	0.0976989	0.8757	0.96009	no	AT1G17680	tetratricopeptide repeat (TPR)-containing protein
AT1G17690	AT1G17690	-	1:6082754-6088340	Col0Mockb_dir	dek2_1Mocka_dir	OK	1.20914	1.21625	0.00845315	0.0190479	0.97625	0.993542	no	NOF1	U3 small nucleolar RNA-associated protein
AT1G17700	AT1G17700	-	1:6089516-6090323	Col0Mockb_dir	dek2_1Mocka_dir	OK	3.17892	2.4993	-0.347011	-0.5402	0.43405	0.766577	no	PRA1.F1	prenylated RAB acceptor 1.F1
AT1G17710	AT1G17710	-	1:6090559-6092027	Col0Mockb_dir	dek2_1Mocka_dir	OK	1.50925	4.03112	1.41735	2.26795	0.0019	0.048941	yes	PEPC1	Pyridoxal phosphate phosphatase-related protein
AT1G17720	AT1G17720	-	1:6093207-6098383	Col0Mockb_dir	dek2_1Mocka_dir	OK	18.2632	15.4181	-0.244316	-0.947161	0.1418	0.493294	no	ATB BETA	Protein phosphatase 2A, regulatory subunit PR55
AT1G17730	AT1G17730	-	1:6099088-6100315	Col0Mockb_dir	dek2_1Mocka_dir	OK	45.9309	41.0286	-0.162836	-0.627402	0.3428	0.698536	no	VPS46.1	vacuolar protein sorting 46.1
AT1G17744	AT1G17744	-	1:6100960-6105265	Col0Mockb_dir	dek2_1Mocka_dir	NOTEST	0	0	0	0	1	1	no	AT1G17744	hypothetical protein
AT1G17745	AT1G17745	-	1:6100960-6105265	Col0Mockb_dir	dek2_1Mocka_dir	OK	11.1193	14.0675	0.339295	1.29336	0.04985	0.311946	no	PGDH	D-3-phosphoglycerate dehydrogenase
AT1G17750	AT1G17750	-	1:6106655-6116617	Col0Mockb_dir	dek2_1Mocka_dir	OK	1.32054	1.57365	0.252983	0.375664	0.5495	0.829199	no	PEPR2	PEP1 receptor 2
AT1G17760	AT1G17760	-	1:6106655-6116617	Col0Mockb_dir	dek2_1Mocka_dir	OK	2.40051	2.57481	0.101123	0.27529	0.6704	0.886851	no	CSTF77	Tetratricopeptide repeat (TPR)-like superfamily protein
AT1G17770	AT1G17770	-	1:6120740-6122822	Col0Mockb_dir	dek2_1Mocka_dir	NOTEST	0	0	0	0	1	1	no	SUVH7	histone-lysine N-methyltransferase, H3 lysine-9 specific SUVH3-like protein
AT1G17780	AT1G17780	-	1:6123700-6125269	Col0Mockb_dir	dek2_1Mocka_dir	OK	11.9657	9.57958	-0.320865	-0.963855	0.1316	0.47782	no	AT1G17780	transmembrane protein
AT1G17790	AT1G17790	-	1:6125355-6127404	Col0Mockb_dir	dek2_1Mocka_dir	OK	2.63861	2.60445	-0.0188011	-0.0420987	0.94675	0.984477	no	AT1G17790	DNA-binding bromodomain-containing protein
AT1G17800	AT1G17800	-	1:6128822-6129508	Col0Mockb_dir	dek2_1Mocka_dir	NOTEST	0	0	0	0	1	1	no	ENODL22	early nodulin-like protein 22
AT1G17810	AT1G17810	-	1:6130024-6135345	Col0Mockb_dir	dek2_1Mocka_dir	NOTEST	0	0.00716277	inf	0	1	1	no	BETA-TIP	beta-tonoplast intrinsic protein
AT1G17820	AT1G17820	-	1:6130024-6135345	Col0Mockb_dir	dek2_1Mocka_dir	OK	6.37879	4.82266	-0.403455	-1.36474	0.0341	0.259287	no	AT1G17820	testis-expressed sequence 2-like protein (DUF2404)
AT1G17830	AT1G17830	-	1:6135802-6138432	Col0Mockb_dir	dek2_1Mocka_dir	OK	3.8974	2.76031	-0.497681	-1.20153	0.0702	0.359419	no	AT1G17830	hypothetical protein (DUF789)
AT1G17840	AT1G17840	-	1:6142563-6148940	Col0Mockb_dir	dek2_1Mocka_dir	OK	7.83584	9.39423	0.261686	0.676245	0.29955	0.665676	no	ABCG11	white-brown complex-like protein
AT1G17850	AT1G17850	-	1:6142563-6148940	Col0Mockb_dir	dek2_1Mocka_dir	OK	12.7823	11.0228	-0.213659	-0.533494	0.40565	0.747661	no	AT1G17850	Rhodanese/Cell cycle control phosphatase superfamily protein
AT1G17860	AT1G17860	-	1:6149300-6152222	Col0Mockb_dir	dek2_1Mocka_dir	OK	185.702	181.224	-0.0352211	-0.133909	0.83575	0.948789	no	AT1G17860	Kunitz family trypsin and protease inhibitor protein
AT1G17870	AT1G17870	-	1:6149300-6152222	Col0Mockb_dir	dek2_1Mocka_dir	OK	2.85741	3.57831	0.324569	0.257098	0.6789	0.889313	no	EGY3	ethylene-dependent gravitropism-deficient and yellow-green-like 3
AT1G17880	AT1G17880	-	1:6152408-6153982	Col0Mockb_dir	dek2_1Mocka_dir	OK	165.688	160.046	-0.0499832	-0.191436	0.7715	0.927093	no	BTF3	basic transcription factor 3
AT1G17890	AT1G17890	-	1:6154267-6155752	Col0Mockb_dir	dek2_1Mocka_dir	OK	37.206	37.8536	0.0248951	0.0968986	0.88165	0.961989	no	GER2	NAD(P)-binding Rossmann-fold superfamily protein
AT1G17910	AT1G17910	-	1:6159125-6161615	Col0Mockb_dir	dek2_1Mocka_dir	NOTEST	0	0	0	0	1	1	no	AT1G17910	Wall-associated kinase family protein
AT1G17920	AT1G17920	-	1:6161871-6165382	Col0Mockb_dir	dek2_1Mocka_dir	OK	1.58467	1.18194	-0.423024	-0.852907	0.18465	0.547659	no	HDG12	homeodomain GLABROUS 12
AT1G17930	AT1G17930	-	1:6166219-6168839	Col0Mockb_dir	dek2_1Mocka_dir	OK	4.0808	3.45772	-0.239034	-0.642079	0.3149	0.677256	no	AT1G17930	Aminotransferase-like, plant mobile domain family protein
AT1G17940	AT1G17940	-	1:6169340-6173222	Col0Mockb_dir	dek2_1Mocka_dir	OK	2.66508	2.47165	-0.108701	-0.285181	0.66465	0.883821	no	AT1G17940	Endosomal targeting BRO1-like domain-containing protein
AT1G17950	AT1G17950	-	1:6177616-6179289	Col0Mockb_dir	dek2_1Mocka_dir	OK	0.944882	1.24201	0.394468	0.507837	0.42375	0.760693	no	MYB52	myb domain protein 52
AT1G17960	AT1G17960	-	1:6180895-6183806	Col0Mockb_dir	dek2_1Mocka_dir	NOTEST	0.287693	0.477322	0.730433	0	1	1	no	AT1G17960	Threonyl-tRNA synthetase
AT1G17970	AT1G17970	-	1:6184903-6187472	Col0Mockb_dir	dek2_1Mocka_dir	OK	8.57366	7.76047	-0.143767	-0.472359	0.4579	0.779337	no	AT1G17970	RING/U-box superfamily protein
AT1G17980	AT1G17980	-	1:6187506-6191708	Col0Mockb_dir	dek2_1Mocka_dir	OK	2.79232	2.80224	0.00511668	0.0145176	0.9816	0.994116	no	PAPS1	poly(A) polymerase 1
AT1G17990	AT1G17990	-	1:6192070-6194093	Col0Mockb_dir	dek2_1Mocka_dir	OK	22.9376	22.2065	-0.0467282	-0.17862	0.78255	0.930683	no	AT1G17990	FMN-linked oxidoreductases superfamily protein
AT1G18000	AT1G18000	-	1:6194542-6196229	Col0Mockb_dir	dek2_1Mocka_dir	OK	12.2429	13.1845	0.1069	0.391242	0.56745	0.83846	no	AT1G18000	Major facilitator superfamily protein
AT1G18010	AT1G18010	-	1:6199897-6201484	Col0Mockb_dir	dek2_1Mocka_dir	OK	13.927	12.6623	-0.137354	-0.50554	0.46365	0.782704	no	AT1G18010	Major facilitator superfamily protein
AT1G18020	AT1G18020	-	1:6202248-6203918	Col0Mockb_dir	dek2_1Mocka_dir	OK	25.9001	24.661	-0.0707267	-0.269909	0.6836	0.891775	no	AT1G18020	FMN-linked oxidoreductases superfamily protein
AT1G18030	AT1G18030	-	1:6204342-6209500	Col0Mockb_dir	dek2_1Mocka_dir	OK	3.84598	3.31226	-0.215536	-0.513858	0.41995	0.758314	no	AT1G18030	Protein phosphatase 2C family protein
AT1G18040	AT1G18040	-	1:6204342-6209500	Col0Mockb_dir	dek2_1Mocka_dir	OK	2.35424	2.63418	0.16209	0.306623	0.6328	0.871315	no	CDKD1;3	cyclin-dependent kinase D1;3
AT1G18050	AT1G18050	-	1:6209770-6211588	Col0Mockb_dir	dek2_1Mocka_dir	NOTEST	0.314554	0.152623	-1.04334	0	1	1	no	AT1G18050	SWAP/surp RNA-binding domain protein
AT1G18060	AT1G18060	-	1:6211872-6213444	Col0Mockb_dir	dek2_1Mocka_dir	OK	180.589	139.833	-0.369009	-1.4083	0.02815	0.232971	no	AT1G18060	microbial collagenase
AT1G18070	AT1G18070	-	1:6213724-6218340	Col0Mockb_dir	dek2_1Mocka_dir	OK	20.6608	19.813	-0.0604496	-0.233587	0.7191	0.907214	no	AT1G18070	Translation elongation factor EF1A/initiation factor IF2gamma family protein
AT1G18080	AT1G18080	-	1:6222200-6224151	Col0Mockb_dir	dek2_1Mocka_dir	OK	235.951	259.799	0.138904	0.523074	0.4269	0.762302	no	ATARCA	Transducin/WD40 repeat-like superfamily protein
AT1G18090	AT1G18090	-	1:6224500-6230188	Col0Mockb_dir	dek2_1Mocka_dir	OK	0.869745	0.715272	-0.282099	-0.303055	0.6393	0.875213	no	AT1G18090	5'-3' exonuclease family protein
AT1G18100	AT1G18100	-	1:6224500-6230188	Col0Mockb_dir	dek2_1Mocka_dir	OK	5.38796	5.23841	-0.0406081	-0.114796	0.8582	0.956236	no	E12A11	PEBP (phosphatidylethanolamine-binding protein) family protein
AT1G18130	AT1G18130	-	1:6235894-6238799	Col0Mockb_dir	dek2_1Mocka_dir	NOTEST	0	0	0	0	1	1	no	AT1G18130	Class II aaRS and biotin synthetases superfamily protein
AT1G18140	AT1G18140	-	1:6238843-6241436	Col0Mockb_dir	dek2_1Mocka_dir	OK	6.18599	5.8147	-0.0892994	-0.287456	0.6635	0.882939	no	LAC1	laccase 1
AT1G18150	AT1G18150	-	1:6244297-6247812	Col0Mockb_dir	dek2_1Mocka_dir	OK	5.01235	5.14811	0.0385572	0.121186	0.8462	0.952257	no	ATMPK8	Protein kinase superfamily protein
AT1G18160	AT1G18160	-	1:6248792-6254039	Col0Mockb_dir	dek2_1Mocka_dir	OK	5.03147	4.90486	-0.0367702	-0.128762	0.84195	0.950887	no	AT1G18160	Protein kinase superfamily protein
AT1G18170	AT1G18170	-	1:6254228-6255690	Col0Mockb_dir	dek2_1Mocka_dir	OK	29.3159	23.8546	-0.297415	-1.1375	0.08625	0.397267	no	AT1G18170	FKBP-like peptidyl-prolyl cis-trans isomerase family protein
AT1G18180	AT1G18180	-	1:6255829-6261457	Col0Mockb_dir	dek2_1Mocka_dir	OK	1.06373	0.994291	-0.0973933	-0.081275	0.8993	0.968735	no	AT1G18180	3-oxo-5-alpha-steroid 4-dehydrogenase (DUF1295)
AT1G18190	AT1G18190	-	1:6255829-6261457	Col0Mockb_dir	dek2_1Mocka_dir	OK	5.82792	4.55459	-0.35566	-1.14371	0.08165	0.387598	no	GC2	golgin Putative 2
AT1G18200	AT1G18200	-	1:6265415-6268828	Col0Mockb_dir	dek2_1Mocka_dir	OK	6.35483	7.38436	0.216621	0.248168	0.6982	0.898033	no	RABA6b	Rab GTPase-like A1I protein
AT1G18210	AT1G18210	-	1:6265415-6268828	Col0Mockb_dir	dek2_1Mocka_dir	OK	32.5556	31.0577	-0.0679542	-0.244134	0.71285	0.904422	no	AT1G18210	Calcium-binding EF-hand family protein
AT1G18220	AT1G18220	-	1:6269669-6269807	Col0Mockb_dir	dek2_1Mocka_dir	NOTEST	0	0	0	0	1	1	no	PUP9	purine permease 9
AT1G18250	AT1G18250	-	1:6276787-6278150	Col0Mockb_dir	dek2_1Mocka_dir	OK	38.1118	27.6404	-0.463461	-1.90075	0.0078	0.120363	no	ATLP-1	Pathogenesis-related thaumatin superfamily protein
AT1G18260	AT1G18260	-	1:6278847-6282103	Col0Mockb_dir	dek2_1Mocka_dir	OK	12.2171	11.1767	-0.128408	-0.481946	0.46355	0.782704	no	EBS5	HCP-like superfamily protein
AT1G18265	AT1G18265	-	1:6282251-6283293	Col0Mockb_dir	dek2_1Mocka_dir	OK	8.8003	7.77613	-0.178499	-0.477799	0.47275	0.788787	no	AT1G18265	zein-binding protein (Protein of unknown function, DUF593)
AT1G18270	AT1G18270	-	1:6283411-6293871	Col0Mockb_dir	dek2_1Mocka_dir	OK	3.61137	3.39111	-0.0907885	-0.331948	0.6036	0.856277	no	AT1G18270	ketose-bisphosphate aldolase class-II family protein
AT1G18280	AT1G18280	-	1:6294332-6295364	Col0Mockb_dir	dek2_1Mocka_dir	NOTEST	0.0842956	0.153754	0.867095	0	1	1	no	AT1G18280	Bifunctional inhibitor/lipid-transfer protein/seed storage 2S albumin superfamily protein
AT1G18290	AT1G18290	-	1:6297363-6298328	Col0Mockb_dir	dek2_1Mocka_dir	OK	1.71908	0.999905	-0.781776	-0.871101	0.2017	0.569326	no	AT1G18290	DUF4228 domain protein
AT1G18300	AT1G18300	-	1:6299686-6301086	Col0Mockb_dir	dek2_1Mocka_dir	OK	4.47996	8.32556	0.894062	2.22687	0.00115	0.035219	yes	NUDT4	nudix hydrolase homolog 4
AT1G18310	AT1G18310	-	1:6301199-6303956	Col0Mockb_dir	dek2_1Mocka_dir	NOTEST	0	0.00784869	inf	0	1	1	no	AT1G18310	glycosyl hydrolase family 81 protein
AT1G18320	AT1G18320	-	1:6304359-6305689	Col0Mockb_dir	dek2_1Mocka_dir	OK	1.8351	1.87074	0.0277511	0.0400596	0.9529	0.986088	no	AT1G18320	Mitochondrial import inner membrane translocase subunit Tim17/Tim22/Tim23 family protein
AT1G18330	AT1G18330	-	1:6305965-6308013	Col0Mockb_dir	dek2_1Mocka_dir	OK	25.6685	19.597	-0.389367	-1.45299	0.02375	0.213579	no	EPR1	Homeodomain-like superfamily protein
AT1G18335	AT1G18335	-	1:6309040-6311326	Col0Mockb_dir	dek2_1Mocka_dir	OK	3.29451	3.45723	0.0695515	0.162608	0.8049	0.937373	no	AT1G18335	Acyl-CoA N-acyltransferases (NAT) superfamily protein
AT1G18340	AT1G18340	-	1:6311482-6313931	Col0Mockb_dir	dek2_1Mocka_dir	OK	1.6207	1.93276	0.254045	0.471443	0.46885	0.786294	no	AT1G18340	basal transcription factor complex subunit-like protein
AT1G18350	AT1G18350	-	1:6315650-6319427	Col0Mockb_dir	dek2_1Mocka_dir	NOTEST	0.457074	0.243155	-0.910554	0	1	1	no	MKK7	MAP kinase kinase 7
AT1G18360	AT1G18360	-	1:6315650-6319427	Col0Mockb_dir	dek2_1Mocka_dir	OK	23.1814	17.0755	-0.441037	-1.68066	0.009	0.130592	no	AT1G18360	alpha/beta-Hydrolases superfamily protein
AT1G18370	AT1G18370	-	1:6319649-6324222	Col0Mockb_dir	dek2_1Mocka_dir	OK	3.92658	4.52466	0.204537	0.672004	0.29125	0.658803	no	HIK	ATP binding microtubule motor family protein
AT1G18390	AT1G18390	-	1:6325641-6330098	Col0Mockb_dir	dek2_1Mocka_dir	OK	4.17026	4.08149	-0.0310426	-0.101136	0.8775	0.960325	no	AT1G18390	Serine/Threonine kinase family catalytic domain protein
AT1G18400	AT1G18400	-	1:6331397-6333743	Col0Mockb_dir	dek2_1Mocka_dir	OK	3.03926	3.08804	0.0229716	0.0520778	0.935	0.980182	no	BEE1	BR enhanced expression 1
AT1G18410	AT1G18410	-	1:6336527-6342460	Col0Mockb_dir	dek2_1Mocka_dir	NOTEST	0.242061	0.0990085	-1.28974	0	1	1	no	AT1G18410	P-loop containing nucleoside triphosphate hydrolases superfamily protein
AT1G18420	AT1G18420	-	1:6343329-6345689	Col0Mockb_dir	dek2_1Mocka_dir	OK	2.67012	3.30027	0.305683	0.76112	0.2467	0.615086	no	AT1G18420	aluminum activated malate transporter family protein
AT1G18440	AT1G18440	-	1:6345973-6347910	Col0Mockb_dir	dek2_1Mocka_dir	OK	7.72622	5.40635	-0.515107	-1.46219	0.0268	0.22698	no	AT1G18440	Peptidyl-tRNA hydrolase family protein
AT1G18450	AT1G18450	-	1:6348106-6351975	Col0Mockb_dir	dek2_1Mocka_dir	OK	3.34105	3.60693	0.11047	0.321804	0.61075	0.860228	no	ARP4	actin-related protein 4
AT1G18460	AT1G18460	-	1:6352469-6356113	Col0Mockb_dir	dek2_1Mocka_dir	OK	20.3218	20.5642	0.0171047	0.0674784	0.91815	0.974095	no	AT1G18460	alpha/beta-Hydrolases superfamily protein
AT1G18470	AT1G18470	-	1:6356130-6360192	Col0Mockb_dir	dek2_1Mocka_dir	OK	5.20404	5.69713	0.130602	0.428796	0.5048	0.806974	no	AT1G18470	Transmembrane Fragile-X-F-associated protein
AT1G18480	AT1G18480	-	1:6361628-6363007	Col0Mockb_dir	dek2_1Mocka_dir	OK	11.3257	10.989	-0.0435392	-0.139063	0.8284	0.945652	no	SLP2	Calcineurin-like metallo-phosphoesterase superfamily protein
AT1G18485	AT1G18485	-	1:6363171-6366235	Col0Mockb_dir	dek2_1Mocka_dir	OK	7.68201	6.00148	-0.356167	-1.21147	0.06095	0.338202	no	AT1G18485	Pentatricopeptide repeat (PPR) superfamily protein
AT1G18486	AT1G18486	-	1:6366396-6368849	Col0Mockb_dir	dek2_1Mocka_dir	NOTEST	0	0	0	0	1	1	no	AT1G18486	transmembrane protein
AT1G18490	AT1G18490	-	1:6366396-6368849	Col0Mockb_dir	dek2_1Mocka_dir	OK	5.95545	5.77548	-0.0442681	-0.127709	0.84365	0.951567	no	AT1G18490	2-aminoethanethiol dioxygenase, putative (DUF1637)
AT1G18500	AT1G18500	-	1:6369346-6373025	Col0Mockb_dir	dek2_1Mocka_dir	OK	12.8792	10.2288	-0.332398	-1.2435	0.05225	0.316126	no	MAML-4	methylthioalkylmalate synthase-like 4
AT1G18510	AT1G18510	-	1:6373294-6374090	Col0Mockb_dir	dek2_1Mocka_dir	NOTEST	0	0	0	0	1	1	no	TET16	tetraspanin
AT1G18520	AT1G18520	-	1:6374931-6376316	Col0Mockb_dir	dek2_1Mocka_dir	NOTEST	0	0	0	0	1	1	no	TET11	tetraspanin11
AT1G18530	AT1G18530	-	1:6376782-6377256	Col0Mockb_dir	dek2_1Mocka_dir	OK	0.693147	0.368562	-0.911254	-0.448536	0.5494	0.829199	no	AT1G18530	EF hand calcium-binding protein family
AT1G18540	AT1G18540	-	1:6377320-6378580	Col0Mockb_dir	dek2_1Mocka_dir	OK	297.521	309.093	0.0550503	0.204451	0.75465	0.921795	no	AT1G18540	Ribosomal protein L6 family protein
AT1G18550	AT1G18550	-	1:6381502-6384340	Col0Mockb_dir	dek2_1Mocka_dir	OK	1.736	2.42493	0.48218	1.10801	0.0876	0.400294	no	AT1G18550	ATP binding microtubule motor family protein
AT1G18560	AT1G18560	-	1:6385448-6388080	Col0Mockb_dir	dek2_1Mocka_dir	OK	1.76367	1.88203	0.0937134	0.194419	0.76455	0.925017	no	AT1G18560	BED zinc finger and hAT dimerization domain-containing protein
AT1G18570	AT1G18570	-	1:6389410-6391267	Col0Mockb_dir	dek2_1Mocka_dir	OK	1.53728	4.20317	1.4511	2.78885	0.0001	0.00586382	yes	MYB51	myb domain protein 51
AT1G18580	AT1G18580	-	1:6395863-6398239	Col0Mockb_dir	dek2_1Mocka_dir	OK	8.81336	7.93925	-0.150689	-0.503205	0.4388	0.768976	no	GAUT11	galacturonosyltransferase 11
AT1G18590	AT1G18590	-	1:6398579-6399942	Col0Mockb_dir	dek2_1Mocka_dir	OK	31.1117	31.5024	0.0180068	0.0668262	0.91675	0.974095	no	SOT17	sulfotransferase 17
AT1G18600	AT1G18600	-	1:6400403-6402791	Col0Mockb_dir	dek2_1Mocka_dir	OK	5.11118	3.67488	-0.47596	-1.26271	0.05265	0.316646	no	RBL12	RHOMBOID-like protein 12
AT1G18610	AT1G18610	-	1:6405644-6409297	Col0Mockb_dir	dek2_1Mocka_dir	OK	3.60281	2.60352	-0.46866	-1.30107	0.04735	0.305165	no	AT1G18610	Galactose oxidase/kelch repeat superfamily protein
AT1G18620	AT1G18620	-	1:6409977-6414451	Col0Mockb_dir	dek2_1Mocka_dir	OK	22.4055	17.1032	-0.389587	-1.50593	0.02005	0.197796	no	TRM3	LONGIFOLIA protein
AT1G18630	AT1G18630	-	1:6414724-6418690	Col0Mockb_dir	dek2_1Mocka_dir	OK	9.25799	12.254	0.404479	0.965364	0.144	0.494992	no	GR-RBP6	glycine-rich RNA-binding protein 6
AT1G18640	AT1G18640	-	1:6414724-6418690	Col0Mockb_dir	dek2_1Mocka_dir	OK	5.543	5.55541	0.00322766	0.00674526	0.9918	0.997554	no	PSP	3-phosphoserine phosphatase
AT1G18650	AT1G18650	-	1:6418857-6420557	Col0Mockb_dir	dek2_1Mocka_dir	OK	48.7537	36.6236	-0.412738	-1.60674	0.01465	0.172012	no	PDCB3	plasmodesmata callose-binding protein 3
AT1G18660	AT1G18660	-	1:6421116-6425880	Col0Mockb_dir	dek2_1Mocka_dir	OK	6.98359	6.86099	-0.0255531	-0.0917928	0.88755	0.964257	no	AT1G18660	zinc finger (C3HC4-type RING finger) family protein
AT1G18670	AT1G18670	-	1:6426897-6430696	Col0Mockb_dir	dek2_1Mocka_dir	OK	3.04992	2.63679	-0.209986	-0.58944	0.3602	0.711542	no	IBS1	Protein kinase superfamily protein
AT1G18680	AT1G18680	-	1:6431937-6433464	Col0Mockb_dir	dek2_1Mocka_dir	OK	3.8898	4.24698	0.126744	0.277419	0.66905	0.886008	no	AT1G18680	HNH endonuclease domain-containing protein
AT1G18690	AT1G18690	-	1:6433573-6436922	Col0Mockb_dir	dek2_1Mocka_dir	OK	4.05064	2.59836	-0.640552	-1.79513	0.0059	0.102732	no	XXT4	Galactosyl transferase GMA12/MNN10 family protein
AT1G18700	AT1G18700	-	1:6437476-6444076	Col0Mockb_dir	dek2_1Mocka_dir	OK	3.24677	3.33527	0.0387986	0.128163	0.84625	0.952257	no	AT1G18700	DNAJ heat shock N-terminal domain-containing protein
AT1G18710	AT1G18710	-	1:6450593-6453114	Col0Mockb_dir	dek2_1Mocka_dir	OK	1.738	1.38766	-0.324774	-0.594019	0.3391	0.694824	no	MYB47	myb domain protein 47
AT1G18720	AT1G18720	-	1:6457820-6459751	Col0Mockb_dir	dek2_1Mocka_dir	OK	35.7226	34.5391	-0.048607	-0.194255	0.77045	0.926686	no	AT1G18720	ER membrane protein, putative (DUF962)
AT1G18730	AT1G18730	-	1:6460597-6462224	Col0Mockb_dir	dek2_1Mocka_dir	OK	56.8168	52.8747	-0.103741	-0.39933	0.5309	0.820649	no	PnsB4	NDH dependent flow 6
AT1G18740	AT1G18740	-	1:6463921-6465476	Col0Mockb_dir	dek2_1Mocka_dir	OK	11.7213	15.1766	0.372719	1.23977	0.05815	0.331618	no	AT1G18740	ROH1, putative (DUF793)
AT1G18750	AT1G18750	-	1:6466760-6469984	Col0Mockb_dir	dek2_1Mocka_dir	OK	1.93836	1.77138	-0.129957	-0.276629	0.67205	0.886851	no	AGL65	AGAMOUS-like 65
AT1G18760	AT1G18760	-	1:6471149-6471824	Col0Mockb_dir	dek2_1Mocka_dir	NOTEST	0	0	0	0	1	1	no	AT1G18760	Zinc finger, C3HC4 type (RING finger) family protein
AT1G18770	AT1G18770	-	1:6473369-6474048	Col0Mockb_dir	dek2_1Mocka_dir	NOTEST	0	0	0	0	1	1	no	AT1G18770	RING/U-box superfamily protein
AT1G18773	AT1G18773	-	1:6474801-6475904	Col0Mockb_dir	dek2_1Mocka_dir	OK	11.4315	6.23693	-0.874109	-2.25063	0.0006	0.0221933	yes	AT1G18773	acyl thioesterase-like protein
AT1G18780	AT1G18780	-	1:6476257-6477235	Col0Mockb_dir	dek2_1Mocka_dir	NOTEST	0	0.0415315	inf	0	1	1	no	AT1G18780	RING/U-box superfamily protein
AT1G18790	AT1G18790	-	1:6478850-6480043	Col0Mockb_dir	dek2_1Mocka_dir	NOTEST	0	0	0	0	1	1	no	RKD1	RWP-RK domain-containing protein
AT1G18800	AT1G18800	-	1:6481112-6483596	Col0Mockb_dir	dek2_1Mocka_dir	OK	12.989	12.8136	-0.0196195	-0.0686155	0.91355	0.972941	no	NRP2	NAP1-related protein 2
AT1G18810	AT1G18810	-	1:6485595-6487030	Col0Mockb_dir	dek2_1Mocka_dir	OK	9.12207	7.91835	-0.204161	-0.590891	0.35675	0.7089	no	AT1G18810	phytochrome kinase substrate-like protein
AT1G18830	AT1G18830	-	1:6489308-6494218	Col0Mockb_dir	dek2_1Mocka_dir	NOTEST	0.037924	0.0284432	-0.415023	0	1	1	no	AT1G18830	Transducin/WD40 repeat-like superfamily protein
AT1G18835	AT1G18835	-	1:6496097-6496396	Col0Mockb_dir	dek2_1Mocka_dir	OK	0.880159	0.767034	-0.198473	-0.107845	0.87715	0.960325	no	MIF3	mini zinc finger
AT1G18840	AT1G18840	-	1:6500847-6504413	Col0Mockb_dir	dek2_1Mocka_dir	OK	10.2119	10.49	0.0387551	0.141129	0.8276	0.9455	no	IQD30	IQ-domain 30
AT1G18850	AT1G18850	-	1:6504805-6506424	Col0Mockb_dir	dek2_1Mocka_dir	OK	17.6363	16.9907	-0.0538075	-0.185701	0.7753	0.92892	no	AT1G18850	hypothetical protein
AT1G18860	AT1G18860	-	1:6509491-6511227	Col0Mockb_dir	dek2_1Mocka_dir	OK	2.08004	1.77607	-0.22792	-0.405308	0.5316	0.820713	no	WRKY61	WRKY DNA-binding protein 61
AT1G18870	AT1G18870	-	1:6515428-6519282	Col0Mockb_dir	dek2_1Mocka_dir	OK	0.545759	0.59569	0.126298	0.177363	0.7767	0.929412	no	ICS2	isochorismate synthase 2
AT1G18871	AT1G18871	-	1:6519308-6519485	Col0Mockb_dir	dek2_1Mocka_dir	NOTEST	0	0	0	0	1	1	no	AT1G18871	hypothetical protein
AT1G18880	AT1G18880	-	1:6520747-6525962	Col0Mockb_dir	dek2_1Mocka_dir	OK	2.73846	2.92917	0.0971267	0.132841	0.838	0.949597	no	NRT1.9	Major facilitator superfamily protein
AT1G18890	AT1G18890	-	1:6520747-6525962	Col0Mockb_dir	dek2_1Mocka_dir	OK	14.833	14.7356	-0.00950149	-0.0336679	0.9583	0.987524	no	CDPK1	calcium-dependent protein kinase 1
AT1G18900	AT1G18900	-	1:6528983-6538145	Col0Mockb_dir	dek2_1Mocka_dir	OK	6.30598	5.89198	-0.097968	-0.295849	0.6461	0.876645	no	AT1G18900	Pentatricopeptide repeat (PPR) superfamily protein
AT1G18910	AT1G18910	-	1:6528983-6538145	Col0Mockb_dir	dek2_1Mocka_dir	OK	1.98763	1.98042	-0.00524917	-0.00972687	0.98755	0.995741	no	AT1G18910	zinc ion binding protein
AT1G18940	AT1G18940	-	1:6543851-6545592	Col0Mockb_dir	dek2_1Mocka_dir	OK	0.799839	1.22357	0.613321	0.791093	0.21435	0.582299	no	AT1G18940	Nodulin-like / Major Facilitator Superfamily protein
AT1G18950	AT1G18950	-	1:6546398-6551887	Col0Mockb_dir	dek2_1Mocka_dir	OK	5.32706	5.42998	0.0276088	0.0980618	0.87865	0.960503	no	AT1G18950	DDT domain superfamily
AT1G18960	AT1G18960	-	1:6552751-6553940	Col0Mockb_dir	dek2_1Mocka_dir	NOTEST	0.138525	0.150927	0.123704	0	1	1	no	AT1G18960	myb-like HTH transcriptional regulator family protein
AT1G18970	AT1G18970	-	1:6554567-6555377	Col0Mockb_dir	dek2_1Mocka_dir	OK	9.70902	13.3513	0.459581	1.17593	0.07625	0.374064	no	GLP4	germin-like protein 4
AT1G18980	AT1G18980	-	1:6557253-6558045	Col0Mockb_dir	dek2_1Mocka_dir	OK	25.4921	26.2452	0.0420006	0.133421	0.83705	0.949114	no	AT1G18980	RmlC-like cupins superfamily protein
AT1G18990	AT1G18990	-	1:6558677-6560489	Col0Mockb_dir	dek2_1Mocka_dir	NOTEST	0.14678	0.101101	-0.537854	0	1	1	no	AT1G18990	myosin-binding protein, putative (Protein of unknown function, DUF593)
AT1G19000	AT1G19000	-	1:6560791-6562786	Col0Mockb_dir	dek2_1Mocka_dir	OK	71.8263	75.0558	0.0634503	0.245667	0.6987	0.898129	no	AT1G19000	Homeodomain-like superfamily protein
AT1G19010	AT1G19010	-	1:6565493-6567525	Col0Mockb_dir	dek2_1Mocka_dir	OK	4.39076	4.34259	-0.0159143	-0.0409926	0.94745	0.98469	no	AT1G19010	hypothetical protein
AT1G19020	AT1G19020	-	1:6568072-6568597	Col0Mockb_dir	dek2_1Mocka_dir	OK	16.929	28.9521	0.774169	2.34382	0.0021	0.0527966	no	AT1G19020	CDP-diacylglycerol-glycerol-3-phosphate 3-phosphatidyltransferase
AT1G19025	AT1G19025	-	1:6568852-6570939	Col0Mockb_dir	dek2_1Mocka_dir	OK	3.15123	1.86566	-0.756226	-1.54365	0.0163	0.180741	no	AT1G19025	DNA repair metallo-beta-lactamase family protein
AT1G19040	AT1G19040	-	1:6576894-6577413	Col0Mockb_dir	dek2_1Mocka_dir	NOTEST	0	0.387363	inf	0	1	1	no	AT1G19040	NAC (No Apical Meristem) domain transcriptional regulator superfamily protein
AT1G19050	AT1G19050	-	1:6577832-6579178	Col0Mockb_dir	dek2_1Mocka_dir	OK	14.0889	16.3342	0.213338	0.66954	0.29905	0.665676	no	ARR7	response regulator 7
AT1G19060	AT1G19060	-	1:6582065-6583601	Col0Mockb_dir	dek2_1Mocka_dir	NOTEST	0	0	0	0	1	1	no	AT1G19060	hypothetical protein (DUF626)
AT1G19070	AT1G19070	-	1:6584240-6586517	Col0Mockb_dir	dek2_1Mocka_dir	OK	0	1.3792	inf	#NAME?	0.16395	0.520489	no	AT1G19070	F-box family protein
AT1G19080	AT1G19080	-	1:6584240-6586517	Col0Mockb_dir	dek2_1Mocka_dir	OK	3.8384	3.95756	0.0441089	0.10869	0.8688	0.959252	no	TTN10	GINS complex protein
AT1G19086	AT1G19086	-	1:6588541-6589338	Col0Mockb_dir	dek2_1Mocka_dir	NOTEST	0	0	0	0	1	1	no	AT1G19086	hypothetical protein
AT1G19090	AT1G19090	-	1:6590244-6592816	Col0Mockb_dir	dek2_1Mocka_dir	NOTEST	0	0	0	0	1	1	no	RKF2	receptor-like serine/threonine kinase 2
AT1G19100	AT1G19100	-	1:6594929-6601355	Col0Mockb_dir	dek2_1Mocka_dir	OK	1.08836	0.836057	-0.380487	-0.831962	0.20745	0.575234	no	DMS11	Histidine kinase-, DNA gyrase B-, and HSP90-like ATPase family protein
AT1G19110	AT1G19110	-	1:6602125-6605908	Col0Mockb_dir	dek2_1Mocka_dir	OK	7.65912	8.29065	0.114306	0.409683	0.535	0.822509	no	AT1G19110	inter-alpha-trypsin inhibitor heavy chain-like protein
AT1G19115	AT1G19115	-	1:6606236-6607943	Col0Mockb_dir	dek2_1Mocka_dir	NOTEST	0	0.136553	inf	0	1	1	no	AT1G19115	hypothetical protein
AT1G19120	AT1G19120	-	1:6608114-6610613	Col0Mockb_dir	dek2_1Mocka_dir	OK	14.2154	14.933	0.071049	0.137243	0.83165	0.947201	no	LSM1A	Small nuclear ribonucleoprotein family protein
AT1G19130	AT1G19130	-	1:6608114-6610613	Col0Mockb_dir	dek2_1Mocka_dir	OK	39.8808	32.9739	-0.274369	-0.91258	0.1617	0.516968	no	AT1G19130	RmlC-like jelly roll fold protein
AT1G19140	AT1G19140	-	1:6610720-6612516	Col0Mockb_dir	dek2_1Mocka_dir	OK	25.6468	18.9739	-0.434762	-1.6406	0.0133	0.161487	no	AT1G19140	ubiquinone biosynthesis COQ9-like protein
AT1G19150	AT1G19150	-	1:6612748-6613972	Col0Mockb_dir	dek2_1Mocka_dir	OK	107.031	99.3725	-0.107104	-0.433464	0.51585	0.814227	no	Lhca6	PSI type II chlorophyll a/b-binding protein (Lhca2*1)
AT1G19160	AT1G19160	-	1:6614161-6615214	Col0Mockb_dir	dek2_1Mocka_dir	NOTEST	0.134437	0.02332	-2.52729	0	1	1	no	AT1G19160	F-box family protein
AT1G19170	AT1G19170	-	1:6616642-6618986	Col0Mockb_dir	dek2_1Mocka_dir	OK	6.472	5.54858	-0.222093	-0.680628	0.292	0.658925	no	AT1G19170	Pectin lyase-like superfamily protein
AT1G19180	AT1G19180	-	1:6622093-6623620	Col0Mockb_dir	dek2_1Mocka_dir	OK	10.7556	10.6973	-0.00784241	-0.024457	0.9711	0.991439	no	JAZ1	jasmonate-zim-domain protein 1
AT1G19190	AT1G19190	-	1:6623875-6624977	Col0Mockb_dir	dek2_1Mocka_dir	OK	4.4887	1.98693	-1.17575	-2.23956	0.0027	0.0631806	no	AT1G19190	alpha/beta-Hydrolases superfamily protein
AT1G19200	AT1G19200	-	1:6625019-6625856	Col0Mockb_dir	dek2_1Mocka_dir	OK	2.07169	2.63193	0.34531	0.486057	0.46105	0.781182	no	AT1G19200	cyclin-dependent kinase, putative (DUF581)
AT1G19210	AT1G19210	-	1:6626821-6627530	Col0Mockb_dir	dek2_1Mocka_dir	NOTEST	0	0.0346888	inf	0	1	1	no	AT1G19210	Integrase-type DNA-binding superfamily protein
AT1G19220	AT1G19220	-	1:6628067-6633087	Col0Mockb_dir	dek2_1Mocka_dir	OK	1.99809	1.95257	-0.0332424	-0.0920248	0.8838	0.962703	no	ARF19	auxin response factor 19
AT1G19230	AT1G19230	-	1:6644188-6650420	Col0Mockb_dir	dek2_1Mocka_dir	OK	1.2242	0.977054	-0.325326	-0.57522	0.3784	0.724982	no	AT1G19230	Riboflavin synthase-like superfamily protein
AT1G19240	AT1G19240	-	1:6644188-6650420	Col0Mockb_dir	dek2_1Mocka_dir	OK	4.73865	6.1084	0.366317	0.582746	0.35085	0.703523	no	AT1G19240	transmembrane protein
AT1G19250	AT1G19250	-	1:6650528-6653078	Col0Mockb_dir	dek2_1Mocka_dir	NOTEST	0.0365508	0.118072	1.69169	0	1	1	no	FMO1	flavin-dependent monooxygenase 1
AT1G19260	AT1G19260	-	1:6657259-6659569	Col0Mockb_dir	dek2_1Mocka_dir	NOTEST	0.131069	0.0338344	-1.95377	0	1	1	no	AT1G19260	TTF-type zinc finger protein with HAT dimerization domain-containing protein
AT1G19270	AT1G19270	-	1:6662500-6666028	Col0Mockb_dir	dek2_1Mocka_dir	OK	3.6625	3.41453	-0.101143	-0.289279	0.65025	0.878062	no	DA1	DA1
AT1G19290	AT1G19290	-	1:6666248-6668963	Col0Mockb_dir	dek2_1Mocka_dir	OK	0.847721	0.860574	0.0217096	0.0327159	0.95885	0.98758	no	AT1G19290	Pentatricopeptide repeat (PPR) superfamily protein
AT1G19300	AT1G19300	-	1:6671136-6672653	Col0Mockb_dir	dek2_1Mocka_dir	OK	6.89513	5.48471	-0.330163	-0.989597	0.1716	0.531385	no	PARVUS	Nucleotide-diphospho-sugar transferases superfamily protein
AT1G19310	AT1G19310	-	1:6676233-6677673	Col0Mockb_dir	dek2_1Mocka_dir	OK	10.0112	8.07572	-0.309955	-0.90608	0.17635	0.538339	no	AT1G19310	RING/U-box superfamily protein
AT1G19320	AT1G19320	-	1:6679280-6680252	Col0Mockb_dir	dek2_1Mocka_dir	NOTEST	0	0.0670254	inf	0	1	1	no	AT1G19320	Pathogenesis-related thaumatin superfamily protein
AT1G19330	AT1G19330	-	1:6680562-6683533	Col0Mockb_dir	dek2_1Mocka_dir	OK	5.01332	5.22799	0.0604906	0.177151	0.784	0.931094	no	AT1G19330	histone deacetylase complex subunit
AT1G19340	AT1G19340	-	1:6684750-6687116	Col0Mockb_dir	dek2_1Mocka_dir	OK	2.88279	2.68423	-0.102959	-0.232439	0.7206	0.908186	no	AT1G19340	Methyltransferase MT-A70 family protein
AT1G19350	AT1G19350	-	1:6688521-6690414	Col0Mockb_dir	dek2_1Mocka_dir	OK	84.9094	74.9788	-0.179441	-0.707004	0.28055	0.649672	no	BES1	Brassinosteroid signaling positive regulator (BZR1) family protein
AT1G19360	AT1G19360	-	1:6690455-6692477	Col0Mockb_dir	dek2_1Mocka_dir	OK	19.9186	22.1028	0.150113	0.565126	0.38595	0.731225	no	RRA3	Nucleotide-diphospho-sugar transferase family protein
AT1G19370	AT1G19370	-	1:6692763-6694934	Col0Mockb_dir	dek2_1Mocka_dir	OK	4.01638	5.096	0.343471	0.94842	0.14325	0.494541	no	AT1G19370	membrane protein
AT1G19380	AT1G19380	-	1:6698057-6698824	Col0Mockb_dir	dek2_1Mocka_dir	OK	6.32277	18.2164	1.52661	3.29249	5e-05	0.00323653	yes	AT1G19380	sugar, putative (DUF1195)
AT1G19390	AT1G19390	-	1:6700771-6703368	Col0Mockb_dir	dek2_1Mocka_dir	NOTEST	0.00997642	0.0221138	1.14835	0	1	1	no	AT1G19390	Wall-associated kinase family protein
AT1G19394	AT1G19394	-	1:6709772-6711788	Col0Mockb_dir	dek2_1Mocka_dir	NOTEST	0	0.206087	inf	0	1	1	no	AT1G19394	hypothetical protein
AT1G19396	AT1G19396	-	1:6709772-6711788	Col0Mockb_dir	dek2_1Mocka_dir	OK	2.55506	2.54182	-0.00749852	-0.0109943	0.98615	0.995387	no	AT1G19396	hypothetical protein
AT1G19397	AT1G19397	-	1:6709772-6711788	Col0Mockb_dir	dek2_1Mocka_dir	OK	25.2533	17.2411	-0.550618	-1.48024	0.02375	0.213579	no	AT1G19397	transmembrane protein
AT1G19400	AT1G19400	-	1:6712037-6714252	Col0Mockb_dir	dek2_1Mocka_dir	OK	44.9499	35.9494	-0.322351	-1.25061	0.05295	0.31703	no	AT1G19400	Erythronate-4-phosphate dehydrogenase family protein
AT1G19410	AT1G19410	-	1:6714491-6716439	Col0Mockb_dir	dek2_1Mocka_dir	NOTEST	0	0.00802889	inf	0	1	1	no	AT1G19410	FBD / Leucine Rich Repeat domains containing protein
AT1G19430	AT1G19430	-	1:6724572-6728040	Col0Mockb_dir	dek2_1Mocka_dir	OK	4.04624	3.9821	-0.0230542	-0.0696111	0.91	0.971443	no	AT1G19430	S-adenosyl-L-methionine-dependent methyltransferases superfamily protein
AT1G19440	AT1G19440	-	1:6728983-6730931	Col0Mockb_dir	dek2_1Mocka_dir	OK	16.1388	15.3295	-0.0742264	-0.265739	0.6745	0.887273	no	KCS4	3-ketoacyl-CoA synthase 4
AT1G19450	AT1G19450	-	1:6731433-6734882	Col0Mockb_dir	dek2_1Mocka_dir	OK	35.3945	35.7535	0.0145589	0.0570258	0.9277	0.978039	no	AT1G19450	Major facilitator superfamily protein
AT1G19460	AT1G19460	-	1:6738483-6739734	Col0Mockb_dir	dek2_1Mocka_dir	NOTEST	0	0	0	0	1	1	no	AT1G19460	Galactose oxidase/kelch repeat superfamily protein
AT1G19470	AT1G19470	-	1:6741295-6742534	Col0Mockb_dir	dek2_1Mocka_dir	NOTEST	0	0.0647068	inf	0	1	1	no	AT1G19470	Galactose oxidase/kelch repeat superfamily protein
AT1G19480	AT1G19480	-	1:6744352-6746408	Col0Mockb_dir	dek2_1Mocka_dir	OK	2.49489	2.445	-0.0291414	-0.0629952	0.92305	0.976175	no	AT1G19480	DNA glycosylase superfamily protein
AT1G19485	AT1G19485	-	1:6746777-6751507	Col0Mockb_dir	dek2_1Mocka_dir	OK	5.6883	4.67472	-0.283116	-0.967676	0.1318	0.478111	no	AT1G19485	Transducin/WD40 repeat-like superfamily protein
AT1G19490	AT1G19490	-	1:6751672-6753999	Col0Mockb_dir	dek2_1Mocka_dir	OK	2.69265	2.34244	-0.201015	-0.45862	0.4808	0.793405	no	AT1G19490	Basic-leucine zipper (bZIP) transcription factor family protein
AT1G19500	AT1G19500	-	1:6754785-6755684	Col0Mockb_dir	dek2_1Mocka_dir	NOTEST	0.198338	0.0156229	-3.66623	0	1	1	no	AT1G19500	hypothetical protein
AT1G19510	AT1G19510	-	1:6756283-6757377	Col0Mockb_dir	dek2_1Mocka_dir	OK	1.06494	0.535054	-0.993012	-0.824862	0.19765	0.563945	no	RL5	RAD-like 5
AT1G19520	AT1G19520	-	1:6759964-6762778	Col0Mockb_dir	dek2_1Mocka_dir	OK	10.2053	10.9752	0.104935	0.386158	0.55545	0.832056	no	NFD5	pentatricopeptide (PPR) repeat-containing protein
AT1G19530	AT1G19530	-	1:6763914-6764971	Col0Mockb_dir	dek2_1Mocka_dir	OK	2.75898	3.87377	0.489604	0.863004	0.18645	0.54989	no	AT1G19530	DNA polymerase epsilon catalytic subunit A
AT1G19540	AT1G19540	-	1:6765666-6767341	Col0Mockb_dir	dek2_1Mocka_dir	OK	2.09726	1.94301	-0.110211	-0.182861	0.77685	0.929412	no	AT1G19540	NmrA-like negative transcriptional regulator family protein
AT1G19550	AT1G19550	-	1:6767450-6767983	Col0Mockb_dir	dek2_1Mocka_dir	OK	6.51272	14.0928	1.11363	2.08221	0.00405	0.0818913	no	AT1G19550	Glutathione S-transferase family protein
AT1G19570	AT1G19570	-	1:6773301-6774528	Col0Mockb_dir	dek2_1Mocka_dir	OK	297.995	323.873	0.120138	0.457751	0.4912	0.799564	no	DHAR1	dehydroascorbate reductase
AT1G19580	AT1G19580	-	1:6774759-6777456	Col0Mockb_dir	dek2_1Mocka_dir	OK	14.583	15.6023	0.0974718	0.360658	0.5801	0.844311	no	GAMMA CA1	gamma carbonic anhydrase 1
AT1G19600	AT1G19600	-	1:6778987-6781173	Col0Mockb_dir	dek2_1Mocka_dir	OK	33.7546	27.6149	-0.289639	-1.1122	0.08545	0.394721	no	AT1G19600	pfkB-like carbohydrate kinase family protein
AT1G19610	AT1G19610	-	1:6781482-6782039	Col0Mockb_dir	dek2_1Mocka_dir	OK	1.084	1.34131	0.307279	0.266629	0.69765	0.897763	no	PDF1.4	defensin-like protein
AT1G19620	AT1G19620	-	1:6784019-6785075	Col0Mockb_dir	dek2_1Mocka_dir	OK	0.51831	0.975399	0.912179	0.982315	0.16245	0.518598	no	AT1G19620	transmembrane protein
AT1G19630	AT1G19630	-	1:6785426-6787967	Col0Mockb_dir	dek2_1Mocka_dir	NOTEST	0.013493	0.132364	3.29423	0	1	1	no	CYP722A1	cytochrome P450, family 722, subfamily A, polypeptide 1
AT1G19640	AT1G19640	-	1:6788884-6791846	Col0Mockb_dir	dek2_1Mocka_dir	OK	2.22653	1.83123	-0.281979	-0.618132	0.33735	0.692947	no	JMT	jasmonic acid carboxyl methyltransferase
AT1G19650	AT1G19650	-	1:6796201-6799764	Col0Mockb_dir	dek2_1Mocka_dir	OK	4.63844	3.69019	-0.329943	-0.989162	0.12555	0.46778	no	AT1G19650	Sec14p-like phosphatidylinositol transfer family protein
AT1G19660	AT1G19660	-	1:6799980-6802685	Col0Mockb_dir	dek2_1Mocka_dir	OK	5.94885	7.82143	0.394821	1.23011	0.0564	0.325743	no	AT1G19660	Wound-responsive family protein
AT1G19670	AT1G19670	-	1:6803610-6805044	Col0Mockb_dir	dek2_1Mocka_dir	OK	50.6663	31.9761	-0.664031	-2.65185	5e-05	0.00323653	yes	CLH1	chlorophyllase 1
AT1G19680	AT1G19680	-	1:6805456-6809569	Col0Mockb_dir	dek2_1Mocka_dir	OK	9.26701	7.46564	-0.311838	-0.728686	0.2622	0.631688	no	AT1G19680	RING/U-box superfamily protein
AT1G19690	AT1G19690	-	1:6805456-6809569	Col0Mockb_dir	dek2_1Mocka_dir	OK	12.9462	9.82363	-0.398201	-0.918407	0.153	0.506786	no	AT1G19690	NAD(P)-binding Rossmann-fold superfamily protein
AT1G19700	AT1G19700	-	1:6809723-6812663	Col0Mockb_dir	dek2_1Mocka_dir	OK	23.2568	20.4258	-0.18726	-0.715151	0.269	0.638046	no	BEL10	BEL1-like homeodomain 10
AT1G19710	AT1G19710	-	1:6814792-6819542	Col0Mockb_dir	dek2_1Mocka_dir	OK	13.6139	11.8497	-0.200231	-0.361769	0.58075	0.844557	no	AT1G19710	UDP-Glycosyltransferase superfamily protein
AT1G19715	AT1G19715	-	1:6814792-6819542	Col0Mockb_dir	dek2_1Mocka_dir	OK	32.908	27.4269	-0.262847	-0.895213	0.16475	0.521444	no	AT1G19715	Mannose-binding lectin superfamily protein
AT1G19720	AT1G19720	-	1:6819563-6822711	Col0Mockb_dir	dek2_1Mocka_dir	OK	4.19286	7.29464	0.798901	2.54476	5e-05	0.00323653	yes	AT1G19720	Pentatricopeptide repeat (PPR-like) superfamily protein
AT1G19730	AT1G19730	-	1:6822863-6824071	Col0Mockb_dir	dek2_1Mocka_dir	OK	9.85079	10.2222	0.0533985	0.143923	0.8233	0.944701	no	ATTRX4	Thioredoxin superfamily protein
AT1G19740	AT1G19740	-	1:6824321-6825459	Col0Mockb_dir	dek2_1Mocka_dir	OK	93.5942	79.8584	-0.228975	-0.945332	0.1615	0.516903	no	AT1G19740	ATP-dependent protease La (LON) domain protein
AT1G19750	AT1G19750	-	1:6826996-6830063	Col0Mockb_dir	dek2_1Mocka_dir	NOTEST	0.436223	0.446036	0.0320927	0	1	1	no	AT1G19750	Transducin/WD40 repeat-like superfamily protein
AT1G19770	AT1G19770	-	1:6832346-6833837	Col0Mockb_dir	dek2_1Mocka_dir	OK	28.0319	54.4202	0.957072	3.55798	5e-05	0.00323653	yes	PUP14	purine permease 14
AT1G19780	AT1G19780	-	1:6833884-6836578	Col0Mockb_dir	dek2_1Mocka_dir	NOTEST	0.0680577	0.0903377	0.408569	0	1	1	no	CNGC8	cyclic nucleotide gated channel 8
AT1G19790	AT1G19790	-	1:6838119-6840293	Col0Mockb_dir	dek2_1Mocka_dir	OK	0.769713	0.274669	-1.48663	-1.58715	0.02945	0.238386	no	SRS7	SHI-related sequence 7
AT1G19800	AT1G19800	-	1:6846368-6848103	Col0Mockb_dir	dek2_1Mocka_dir	OK	37.3876	31.648	-0.240448	-0.926049	0.15475	0.507774	no	ABCI14	trigalactosyldiacylglycerol 1
AT1G19830	AT1G19830	-	1:6852154-6852872	Col0Mockb_dir	dek2_1Mocka_dir	NOTEST	0.285608	0.426049	0.576986	0	1	1	no	AT1G19830	SAUR-like auxin-responsive protein family
AT1G19835	AT1G19835	-	1:6855951-6860443	Col0Mockb_dir	dek2_1Mocka_dir	OK	11.9329	12.1245	0.0229829	0.088399	0.89695	0.967934	no	AT1G19835	filament-like protein (DUF869)
AT1G19840	AT1G19840	-	1:6872793-6873255	Col0Mockb_dir	dek2_1Mocka_dir	OK	0.923737	1.83831	0.992823	0.7112	0.29975	0.665676	no	AT1G19840	SAUR-like auxin-responsive protein family
AT1G19850	AT1G19850	-	1:6886878-6891374	Col0Mockb_dir	dek2_1Mocka_dir	OK	4.82765	3.74615	-0.365912	-1.19152	0.06445	0.346427	no	MP	Transcriptional factor B3 family protein / auxin-responsive factor AUX/IAA-like protein
AT1G19860	AT1G19860	-	1:6891428-6894736	Col0Mockb_dir	dek2_1Mocka_dir	OK	8.69653	7.04322	-0.304205	-1.0734	0.10125	0.426409	no	AT1G19860	Zinc finger C-x8-C-x5-C-x3-H type family protein
AT1G19870	AT1G19870	-	1:6895014-6898725	Col0Mockb_dir	dek2_1Mocka_dir	OK	16.7772	17.7423	0.0806906	0.315163	0.6308	0.870149	no	iqd32	IQ-domain 32
AT1G19880	AT1G19880	-	1:6900414-6904069	Col0Mockb_dir	dek2_1Mocka_dir	OK	22.4414	17.1817	-0.38529	-1.47971	0.02065	0.200435	no	AT1G19880	Regulator of chromosome condensation (RCC1) family protein
[truncated: 14,384 more rows]

## Sheet: WT_M_vs_WT-T
test_id	gene_id	gene	locus	sample_1	sample_2	status	value_1	value_2	log2(fold_change)	test_stat	p_value	q_value	significant	gene_name	gene_description
AT1G01010	AT1G01010	-	1:3630-5899	Col0Mocka_dir	Col0HrcCa_dir	OK	2.98986	3.15456	0.0773585	0.156283	0.8055	0.944993	no	NAC001	NAC domain containing protein 1
AT1G01020	AT1G01020	-	1:5927-8737	Col0Mocka_dir	Col0HrcCa_dir	OK	3.48066	3.34427	-0.0576684	-0.123827	0.84605	0.958946	no	ARV1	ARV1 family protein
AT1G01030	AT1G01030	-	1:11648-13714	Col0Mocka_dir	Col0HrcCa_dir	OK	1.89596	1.5508	-0.289914	-0.447145	0.4806	0.797433	no	NGA3	AP2/B3-like transcriptional factor family protein
AT1G01040	AT1G01040	-	1:23145-33153	Col0Mocka_dir	Col0HrcCa_dir	OK	4.44186	5.0153	0.175174	0.44231	0.49475	0.806341	no	DCL1	dicer-like 1
AT1G01050	AT1G01050	-	1:23145-33153	Col0Mocka_dir	Col0HrcCa_dir	OK	11.4588	8.3184	-0.462083	-0.668287	0.30065	0.673811	no	PPa1	pyrophosphorylase 1
AT1G01060	AT1G01060	-	1:33378-37871	Col0Mocka_dir	Col0HrcCa_dir	OK	30.2653	19.1588	-0.659659	-2.0839	0.0013	0.0220556	yes	LHY	Homeodomain-like superfamily protein
AT1G01070	AT1G01070	-	1:38751-40944	Col0Mocka_dir	Col0HrcCa_dir	OK	3.28189	2.29673	-0.514947	-0.914966	0.1648	0.518008	no	UMAMIT28	nodulin MtN21 /EamA-like transporter family protein
AT1G01073	AT1G01073	-	1:44676-44787	Col0Mocka_dir	Col0HrcCa_dir	NOTEST	0	0	0	0	1	1	no
AT1G01080	AT1G01080	-	1:45295-47019	Col0Mocka_dir	Col0HrcCa_dir	OK	45.1564	41.5138	-0.121337	-0.378668	0.56755	0.846631	no	AT1G01080	RNA-binding (RRM/RBD/RNP motifs) family protein
AT1G01090	AT1G01090	-	1:47484-49286	Col0Mocka_dir	Col0HrcCa_dir	OK	157.559	142.699	-0.142918	-0.451092	0.47845	0.795735	no	PDH-E1 ALPHA	pyruvate dehydrogenase E1 alpha
AT1G01100	AT1G01100	-	1:50074-51199	Col0Mocka_dir	Col0HrcCa_dir	OK	301.614	239.001	-0.335686	-1.04441	0.10435	0.414384	no	AT1G01100	60S acidic ribosomal protein family
AT1G01110	AT1G01110	-	1:52238-54692	Col0Mocka_dir	Col0HrcCa_dir	OK	2.81326	2.68397	-0.0678726	-0.138885	0.8304	0.953931	no	IQD18	IQ-domain 18
AT1G01115	AT1G01115	-	1:56623-56740	Col0Mocka_dir	Col0HrcCa_dir	NOTEST	0	0	0	0	1	1	no
AT1G01120	AT1G01120	-	1:57268-59167	Col0Mocka_dir	Col0HrcCa_dir	OK	38.018	56.727	0.577354	1.83697	0.0054	0.0660929	no	KCS1	3-ketoacyl-CoA synthase 1
AT1G01130	AT1G01130	-	1:61904-63811	Col0Mocka_dir	Col0HrcCa_dir	OK	0.71102	1.98771	1.48315	1.77958	0.0111	0.109894	no	AT1G01130	CBL-interacting Serine/Threonine-kinase
AT1G01140	AT1G01140	-	1:64165-67625	Col0Mocka_dir	Col0HrcCa_dir	OK	2.73331	3.82765	0.485813	1.09492	0.0897	0.384414	no	CIPK9	CBL-interacting protein kinase 9
AT1G01150	AT1G01150	-	1:70114-72138	Col0Mocka_dir	Col0HrcCa_dir	NOTEST	0.0263433	0.0142289	-0.888609	0	1	1	no	AT1G01150	Homeodomain-like protein with RING/FYVE/PHD-type zinc finger domain-containing protein
AT1G01160	AT1G01160	-	1:72338-74737	Col0Mocka_dir	Col0HrcCa_dir	OK	15.2679	14.8661	-0.0384694	-0.053423	0.93055	0.984238	no	GIF2	GRF1-interacting factor 2
AT1G01170	AT1G01170	-	1:72338-74737	Col0Mocka_dir	Col0HrcCa_dir	OK	118.237	100.334	-0.23687	-0.572564	0.37615	0.730982	no	AT1G01170	ozone-responsive stress-like protein (DUF1138)
AT1G01180	AT1G01180	-	1:75582-76758	Col0Mocka_dir	Col0HrcCa_dir	OK	7.66239	11.8394	0.62773	1.47096	0.0259	0.190731	no	AT1G01180	S-adenosyl-L-methionine-dependent methyltransferases superfamily protein
AT1G01190	AT1G01190	-	1:83044-84864	Col0Mocka_dir	Col0HrcCa_dir	OK	7.06525	8.30621	0.233449	0.572832	0.38205	0.735442	no	CYP78A8	cytochrome P450, family 78, subfamily A, polypeptide 8
AT1G01200	AT1G01200	-	1:86514-88213	Col0Mocka_dir	Col0HrcCa_dir	OK	3.69725	3.58427	-0.0447741	-0.0827263	0.89835	0.976631	no	RABA3	RAB GTPase homolog A3
AT1G01210	AT1G01210	-	1:88897-89745	Col0Mocka_dir	Col0HrcCa_dir	OK	14.7305	13.2997	-0.147413	-0.328634	0.6134	0.865911	no	AT1G01210	DNA-directed RNA polymerase, subunit M, archaeal
AT1G01220	AT1G01220	-	1:91375-95651	Col0Mocka_dir	Col0HrcCa_dir	OK	10.6263	10.5953	-0.00420611	-0.0127579	0.9832	0.996209	no	FKGP	L-fucokinase/GDP-L-fucose pyrophosphorylase
AT1G01225	AT1G01225	-	1:95986-97407	Col0Mocka_dir	Col0HrcCa_dir	OK	6.34524	5.30127	-0.259337	-0.524988	0.41815	0.759293	no	AT1G01225	NC domain-containing protein-like protein
AT1G01230	AT1G01230	-	1:97455-99240	Col0Mocka_dir	Col0HrcCa_dir	OK	14.9363	18.8456	0.335403	0.933607	0.14525	0.486721	no	AT1G01230	ORMDL family protein
AT1G01240	AT1G01240	-	1:99893-101834	Col0Mocka_dir	Col0HrcCa_dir	OK	14.5666	23.7697	0.706453	2.13545	0.0015	0.0246084	yes	AT1G01240	transmembrane protein
AT1G01250	AT1G01250	-	1:104490-105330	Col0Mocka_dir	Col0HrcCa_dir	OK	3.95842	3.01062	-0.394864	-0.565659	0.3894	0.740312	no	AT1G01250	Integrase-type DNA-binding superfamily protein
AT1G01260	AT1G01260	-	1:108945-111609	Col0Mocka_dir	Col0HrcCa_dir	OK	6.37285	8.36288	0.392061	1.08014	0.09845	0.40208	no	AT1G01260	basic helix-loop-helix (bHLH) DNA-binding superfamily protein
AT1G01280	AT1G01280	-	1:112262-113947	Col0Mocka_dir	Col0HrcCa_dir	NOTEST	0	0	0	0	1	1	no	CYP703A2	cytochrome P450, family 703, subfamily A, polypeptide 2
AT1G01290	AT1G01290	-	1:114285-116108	Col0Mocka_dir	Col0HrcCa_dir	OK	9.91463	10.1636	0.0357861	0.0918365	0.8873	0.973743	no	CNX3	cofactor of nitrate reductase and xanthine dehydrogenase 3
AT1G01300	AT1G01300	-	1:116942-118764	Col0Mocka_dir	Col0HrcCa_dir	OK	43.1305	35.5265	-0.27981	-0.880522	0.1742	0.532507	no	AT1G01300	Eukaryotic aspartyl protease family protein
AT1G01305	AT1G01305	-	1:119396-119997	Col0Mocka_dir	Col0HrcCa_dir	NOTEST	0	0	0	0	1	1	no	AT1G01305	hypothetical protein
AT1G01310	AT1G01310	-	1:120153-130577	Col0Mocka_dir	Col0HrcCa_dir	NOTEST	0	0.249384	inf	0	1	1	no	AT1G01310	CAP (Cysteine-rich secretory proteins, Antigen 5, and Pathogenesis-related 1 protein) superfamily protein
AT1G01320	AT1G01320	-	1:120153-130577	Col0Mocka_dir	Col0HrcCa_dir	OK	50.8635	43.6942	-0.21919	-0.663406	0.2962	0.669179	no	AT1G01320	Tetratricopeptide repeat (TPR)-like superfamily protein
AT1G01340	AT1G01340	-	1:132327-135831	Col0Mocka_dir	Col0HrcCa_dir	OK	3.55915	2.93267	-0.279315	-0.632371	0.315	0.685744	no	CNGC10	cyclic nucleotide gated channel 10
AT1G01350	AT1G01350	-	1:136123-138162	Col0Mocka_dir	Col0HrcCa_dir	OK	10.6532	11.1083	0.060363	0.165292	0.7903	0.939595	no	AT1G01350	Zinc finger (CCCH-type/C3HC4-type RING finger) family protein
AT1G01355	AT1G01355	-	1:138512-139568	Col0Mocka_dir	Col0HrcCa_dir	NOTEST	0	0.0598115	inf	0	1	1	no	AT1G01355	Putative endonuclease or glycosyl hydrolase
AT1G01360	AT1G01360	-	1:141970-143183	Col0Mocka_dir	Col0HrcCa_dir	OK	7.63682	10.0009	0.389082	0.86281	0.1782	0.538295	no	RCAR1	regulatory component of ABA receptor 1
AT1G01370	AT1G01370	-	1:143563-145684	Col0Mocka_dir	Col0HrcCa_dir	OK	3.09723	2.18213	-0.505243	-0.881966	0.16765	0.522138	no	HTR12	Histone superfamily protein
AT1G01380	AT1G01380	-	1:147152-147942	Col0Mocka_dir	Col0HrcCa_dir	OK	1.25994	1.57558	0.322522	0.27852	0.6793	0.8964	no	ETC1	Homeodomain-like superfamily protein
AT1G01390	AT1G01390	-	1:148119-149806	Col0Mocka_dir	Col0HrcCa_dir	OK	3.93285	3.41699	-0.20285	-0.397118	0.53555	0.8321	no	AT1G01390	UDP-Glycosyltransferase superfamily protein
AT1G01400	AT1G01400	-	1:150688-152210	Col0Mocka_dir	Col0HrcCa_dir	NOTEST	0	0	0	0	1	1	no	AT1G01400	hypothetical protein
AT1G01410	AT1G01410	-	1:153112-154198	Col0Mocka_dir	Col0HrcCa_dir	NOTEST	0	0	0	0	1	1	no	PUM22	pumilio 22
AT1G01420	AT1G01420	-	1:154491-156011	Col0Mocka_dir	Col0HrcCa_dir	OK	9.61113	9.74575	0.0200671	0.0501976	0.93435	0.9854	no	UGT72B3	UDP-glucosyl transferase 72B3
AT1G01430	AT1G01430	-	1:156800-158655	Col0Mocka_dir	Col0HrcCa_dir	OK	61.1265	53.7179	-0.186396	-0.590617	0.35805	0.719853	no	TBL25	TRICHOME BIREFRINGENCE-LIKE 25
AT1G01440	AT1G01440	-	1:159855-162572	Col0Mocka_dir	Col0HrcCa_dir	OK	3.0232	3.89584	0.365857	0.802814	0.21775	0.587264	no	AT1G01440	hypothetical protein (DUF3133)
AT1G01450	AT1G01450	-	1:164104-165517	Col0Mocka_dir	Col0HrcCa_dir	OK	1.99668	2.86392	0.520392	0.792076	0.2185	0.588602	no	AT1G01450	Protein kinase superfamily protein
AT1G01453	AT1G01453	-	1:166588-167842	Col0Mocka_dir	Col0HrcCa_dir	NOTEST	0.0609231	0.0714772	0.230494	0	1	1	no	AT1G01453	late embryogenesis abundant hydroxyproline-rich glycoprotein family protein
AT1G01460	AT1G01460	-	1:168722-171165	Col0Mocka_dir	Col0HrcCa_dir	NOTEST	0	0.0218514	inf	0	1	1	no	PIPK11	Phosphatidylinositol-4-phosphate 5-kinase, core
AT1G01470	AT1G01470	-	1:172145-172948	Col0Mocka_dir	Col0HrcCa_dir	OK	65.5983	88.3317	0.429273	1.32658	0.0421	0.254823	no	LEA14	Late embryogenesis abundant protein
AT1G01471	AT1G01471	-	1:173250-173466	Col0Mocka_dir	Col0HrcCa_dir	NOTEST	0	0	0	0	1	1	no
AT1G01480	AT1G01480	-	1:175781-178400	Col0Mocka_dir	Col0HrcCa_dir	OK	1.16143	0.796426	-0.544293	-0.727259	0.2673	0.640007	no	ACS2	1-amino-cyclopropane-1-carboxylate synthase 2
AT1G01490	AT1G01490	-	1:180058-182358	Col0Mocka_dir	Col0HrcCa_dir	OK	39.7812	44.2826	0.154651	0.487507	0.4521	0.782039	no	AT1G01490	Heavy metal transport/detoxification superfamily protein
AT1G01500	AT1G01500	-	1:185132-186923	Col0Mocka_dir	Col0HrcCa_dir	OK	8.18552	11.4679	0.486458	1.24323	0.05075	0.286087	no	AT1G01500	Erythronate-4-phosphate dehydrogenase family protein
AT1G01510	AT1G01510	-	1:187210-190056	Col0Mocka_dir	Col0HrcCa_dir	OK	7.8435	7.8034	-0.00739536	-0.0203652	0.97345	0.994126	no	AN	NAD(P)-binding Rossmann-fold superfamily protein
AT1G01520	AT1G01520	-	1:190595-192139	Col0Mocka_dir	Col0HrcCa_dir	NOTEST	0.554555	0.400089	-0.471008	0	1	1	no	ASG4	Homeodomain-like superfamily protein
AT1G01530	AT1G01530	-	1:192639-193670	Col0Mocka_dir	Col0HrcCa_dir	NOTEST	0	0	0	0	1	1	no	AGL28	AGAMOUS-like 28
AT1G01540	AT1G01540	-	1:195779-198684	Col0Mocka_dir	Col0HrcCa_dir	OK	16.6969	18.9372	0.181637	0.560193	0.3827	0.736254	no	AT1G01540	Protein kinase superfamily protein
AT1G01550	AT1G01550	-	1:199638-201775	Col0Mocka_dir	Col0HrcCa_dir	OK	94.5155	98.955	0.0662223	0.211326	0.7495	0.922531	no	BPS1	BPS1-like protein (DUF793)
AT1G01560	AT1G01560	-	1:202135-204335	Col0Mocka_dir	Col0HrcCa_dir	NOTEST	0	0.181839	inf	0	1	1	no	MPK11	MAP kinase 11
AT1G01570	AT1G01570	-	1:205175-207435	Col0Mocka_dir	Col0HrcCa_dir	OK	1.04508	1.0462	0.00153741	0.0020027	0.9919	0.997973	no	AT1G01570	transferring glycosyl group transferase (DUF604)
AT1G01580	AT1G01580	-	1:209394-213041	Col0Mocka_dir	Col0HrcCa_dir	OK	36.9553	36.2287	-0.0286464	-0.0901593	0.89115	0.975096	no	FRO2	ferric reduction oxidase 2
AT1G01590	AT1G01590	-	1:214228-217304	Col0Mocka_dir	Col0HrcCa_dir	NOTEST	0.21537	0.0181295	-3.57041	0	1	1	no	FRO1	ferric reduction oxidase 1
AT1G01600	AT1G01600	-	1:218993-221286	Col0Mocka_dir	Col0HrcCa_dir	OK	2.93222	4.446	0.600513	1.31651	0.04035	0.248975	no	CYP86A4	cytochrome P450, family 86, subfamily A, polypeptide 4
AT1G01610	AT1G01610	-	1:221690-224340	Col0Mocka_dir	Col0HrcCa_dir	OK	24.9838	20.6466	-0.275093	-0.841697	0.1897	0.552013	no	GPAT4	glycerol-3-phosphate acyltransferase 4
AT1G01620	AT1G01620	-	1:225664-227302	Col0Mocka_dir	Col0HrcCa_dir	OK	111.492	120.495	0.112032	0.353887	0.58715	0.853928	no	PIP1C	plasma membrane intrinsic protein 1C
AT1G01630	AT1G01630	-	1:229012-230917	Col0Mocka_dir	Col0HrcCa_dir	OK	14.1988	15.5036	0.126832	0.361758	0.57215	0.848286	no	AT1G01630	Sec14p-like phosphatidylinositol transfer family protein
AT1G01640	AT1G01640	-	1:230993-232508	Col0Mocka_dir	Col0HrcCa_dir	OK	7.43992	7.19043	-0.0492102	-0.109258	0.8627	0.96517	no	AT1G01640	BTB/POZ domain-containing protein
AT1G01650	AT1G01650	-	1:232840-237817	Col0Mocka_dir	Col0HrcCa_dir	OK	3.70806	3.76584	0.0223083	0.0576963	0.92865	0.983469	no	SPPL4	SIGNAL PEPTIDE PEPTIDASE-LIKE 4
AT1G01660	AT1G01660	-	1:240056-242608	Col0Mocka_dir	Col0HrcCa_dir	NOTEST	0.370189	0.384908	0.056251	0	1	1	no	AT1G01660	RING/U-box superfamily protein
AT1G01670	AT1G01670	-	1:242842-245988	Col0Mocka_dir	Col0HrcCa_dir	NOTEST	0.556223	0.300069	-0.89037	0	1	1	no	AT1G01670	RING/U-box superfamily protein
AT1G01680	AT1G01680	-	1:246410-248367	Col0Mocka_dir	Col0HrcCa_dir	NOTEST	0.141623	0	#NAME?	0	1	1	no	PUB54	plant U-box 54
AT1G01690	AT1G01690	-	1:249140-252462	Col0Mocka_dir	Col0HrcCa_dir	OK	1.32063	0.926007	-0.512135	-0.797374	0.21375	0.582231	no	PRD3	putative recombination initiation defects 3
AT1G01695	AT1G01695	-	1:252946-254495	Col0Mocka_dir	Col0HrcCa_dir	OK	1.00676	0.699117	-0.526118	-0.525519	0.39345	0.742847	no	TRM33	Phosphatidylinositol N-acetyglucosaminlytransferase subunit P-like protein
AT1G01700	AT1G01700	-	1:259494-261474	Col0Mocka_dir	Col0HrcCa_dir	OK	1.14222	1.40401	0.297716	0.413503	0.5056	0.812879	no	ROPGEF2	RHO guanyl-nucleotide exchange factor 2
AT1G01710	AT1G01710	-	1:262827-267771	Col0Mocka_dir	Col0HrcCa_dir	OK	5.31698	5.89811	0.149648	0.421178	0.5163	0.820506	no	AT1G01710	acyl-CoA thioesterase II
AT1G01720	AT1G01720	-	1:268329-270775	Col0Mocka_dir	Col0HrcCa_dir	OK	38.8138	36.3266	-0.0955426	-0.280791	0.66915	0.892768	no	ATAF1	NAC (No Apical Meristem) domain transcriptional regulator superfamily protein
AT1G01725	AT1G01725	-	1:268329-270775	Col0Mocka_dir	Col0HrcCa_dir	OK	9.16275	8.05582	-0.185749	-0.156955	0.8127	0.948044	no	AT1G01725	adenylosuccinate synthetase
AT1G01730	AT1G01730	-	1:270955-272061	Col0Mocka_dir	Col0HrcCa_dir	OK	24.8253	22.4674	-0.143975	-0.421459	0.52465	0.825637	no	AT1G01730	hypothetical protein
AT1G01740	AT1G01740	-	1:272110-274569	Col0Mocka_dir	Col0HrcCa_dir	OK	2.17084	2.65254	0.289118	0.528725	0.40875	0.753329	no	BSK4	kinase with tetratricopeptide repeat domain-containing protein
AT1G01750	AT1G01750	-	1:275365-278448	Col0Mocka_dir	Col0HrcCa_dir	OK	17.66	18.7443	0.0859657	0.20905	0.74955	0.922534	no	ADF11	actin depolymerizing factor 11
AT1G01760	AT1G01760	-	1:275365-278448	Col0Mocka_dir	Col0HrcCa_dir	NOTEST	0.430662	0.624619	0.536421	0	1	1	no	AT1G01760	denosine deaminases acting on tRNA
AT1G01770	AT1G01770	-	1:278614-284245	Col0Mocka_dir	Col0HrcCa_dir	OK	2.62262	3.17245	0.27459	0.364239	0.57665	0.850597	no	AT1G01770	propionyl-CoA carboxylase
AT1G01780	AT1G01780	-	1:278614-284245	Col0Mocka_dir	Col0HrcCa_dir	OK	19.1785	15.3306	-0.323075	-0.660475	0.31075	0.68201	no	PLIM2b	GATA type zinc finger transcription factor family protein
AT1G01790	AT1G01790	-	1:284609-291094	Col0Mocka_dir	Col0HrcCa_dir	OK	14.1013	11.0914	-0.346386	-1.08576	0.0927	0.390279	no	KEA1	K efflux antiporter 1
AT1G01800	AT1G01800	-	1:293341-295040	Col0Mocka_dir	Col0HrcCa_dir	OK	51.2978	58.5969	0.191926	0.601132	0.35275	0.716721	no	AT1G01800	NAD(P)-binding Rossmann-fold superfamily protein
AT1G01810	AT1G01810	-	1:295220-295859	Col0Mocka_dir	Col0HrcCa_dir	OK	1.11197	1.36091	0.291456	0.272807	0.70175	0.904919	no	AT1G01810	hypothetical protein
AT1G01820	AT1G01820	-	1:296000-298120	Col0Mocka_dir	Col0HrcCa_dir	OK	12.095	11.8682	-0.027301	-0.07418	0.90465	0.977555	no	PEX11C	peroxin 11c
AT1G01830	AT1G01830	-	1:298534-302315	Col0Mocka_dir	Col0HrcCa_dir	OK	5.68401	4.93956	-0.202527	-0.548744	0.3809	0.734615	no	AT1G01830	ARM repeat superfamily protein
AT1G01840	AT1G01840	-	1:303536-306287	Col0Mocka_dir	Col0HrcCa_dir	OK	4.37782	4.01891	-0.123406	-0.138383	0.84455	0.958142	no	AT1G01840	AP2-like ethylene-responsive transcription factor SNZ
AT1G01860	AT1G01860	-	1:303536-306287	Col0Mocka_dir	Col0HrcCa_dir	OK	11.0587	9.08358	-0.283848	-0.72027	0.26625	0.639389	no	PFC1	Ribosomal RNA adenine dimethylase family protein
AT1G01880	AT1G01880	-	1:306479-309109	Col0Mocka_dir	Col0HrcCa_dir	OK	0.635417	1.00574	0.662474	0.796237	0.22745	0.598593	no	AT1G01880	5'-3' exonuclease family protein
AT1G01900	AT1G01900	-	1:310315-315902	Col0Mocka_dir	Col0HrcCa_dir	OK	4.61949	3.97575	-0.216509	-0.32478	0.6214	0.869224	no	SBTI1.1	subtilase family protein
AT1G01910	AT1G01910	-	1:310315-315902	Col0Mocka_dir	Col0HrcCa_dir	OK	16.8452	15.3764	-0.131626	-0.349257	0.5909	0.856036	no	AT1G01910	P-loop containing nucleoside triphosphate hydrolases superfamily protein
AT1G01920	AT1G01920	-	1:316127-319650	Col0Mocka_dir	Col0HrcCa_dir	OK	4.1063	3.56678	-0.203219	-0.488639	0.44965	0.780013	no	AT1G01920	SET domain-containing protein
AT1G01930	AT1G01930	-	1:319835-322860	Col0Mocka_dir	Col0HrcCa_dir	OK	3.17074	3.39132	0.0970291	0.22343	0.727	0.916235	no	AT1G01930	zinc finger protein-like protein
AT1G01940	AT1G01940	-	1:323026-324917	Col0Mocka_dir	Col0HrcCa_dir	OK	9.98309	9.65833	-0.0477134	-0.121642	0.84835	0.960037	no	AT1G01940	Cyclophilin-like peptidyl-prolyl cis-trans isomerase family protein
AT1G01950	AT1G01950	-	1:325378-337582	Col0Mocka_dir	Col0HrcCa_dir	OK	2.62025	2.24835	-0.220838	-0.236061	0.7122	0.910276	no	ARK2	armadillo repeat kinesin 2
AT1G01960	AT1G01960	-	1:325378-337582	Col0Mocka_dir	Col0HrcCa_dir	OK	11.3991	11.3012	-0.0124512	-0.0362571	0.9549	0.990209	no	EDA10	SEC7-like guanine nucleotide exchange family protein
AT1G01970	AT1G01970	-	1:338290-340077	Col0Mocka_dir	Col0HrcCa_dir	OK	31.8756	25.8297	-0.303417	-0.912402	0.1543	0.502435	no	AT1G01970	Tetratricopeptide repeat (TPR)-like superfamily protein
AT1G01980	AT1G01980	-	1:340171-341999	Col0Mocka_dir	Col0HrcCa_dir	NOTEST	0	0	0	0	1	1	no	AT1G01980	FAD-binding Berberine family protein
AT1G01990	AT1G01990	-	1:343165-344341	Col0Mocka_dir	Col0HrcCa_dir	OK	23.8178	20.2798	-0.232002	-0.646783	0.3131	0.684454	no	AT1G01990	hypothetical protein
AT1G02000	AT1G02000	-	1:345811-347592	Col0Mocka_dir	Col0HrcCa_dir	OK	7.6996	9.60839	0.319511	0.847989	0.195	0.558977	no	GAE2	UDP-D-glucuronate 4-epimerase 2
AT1G02010	AT1G02010	-	1:347890-352480	Col0Mocka_dir	Col0HrcCa_dir	OK	2.72344	2.01683	-0.43334	-0.987531	0.1203	0.445833	no	SEC1A	secretory 1A
AT1G02020	AT1G02020	-	1:352636-354969	Col0Mocka_dir	Col0HrcCa_dir	OK	8.26617	7.72551	-0.0975901	-0.261309	0.68755	0.899965	no	AT1G02020	nitroreductase family protein
AT1G02030	AT1G02030	-	1:355320-357258	Col0Mocka_dir	Col0HrcCa_dir	NOTEST	0.401115	0.420304	0.0674146	0	1	1	no	AT1G02030	C2H2-like zinc finger protein
AT1G02040	AT1G02040	-	1:358103-359078	Col0Mocka_dir	Col0HrcCa_dir	NOTEST	0	0	0	0	1	1	no	AT1G02040	C2H2-type zinc finger family protein
AT1G02050	AT1G02050	-	1:359116-360518	Col0Mocka_dir	Col0HrcCa_dir	OK	6.66508	8.84698	0.408563	1.059	0.12855	0.459785	no	LAP6	Chalcone and stilbene synthase family protein
AT1G02060	AT1G02060	-	1:360917-363094	Col0Mocka_dir	Col0HrcCa_dir	OK	0.815913	1.14238	0.485554	0.605304	0.3237	0.694308	no	AT1G02060	Tetratricopeptide repeat (TPR)-like superfamily protein
AT1G02065	AT1G02065	-	1:365208-367340	Col0Mocka_dir	Col0HrcCa_dir	NOTEST	0.270562	0.752021	1.47481	0	1	1	no	SPL8	squamosa promoter binding protein-like 8
AT1G02070	AT1G02070	-	1:370256-370967	Col0Mocka_dir	Col0HrcCa_dir	NOTEST	0.12332	0.272421	1.14343	0	1	1	no	AT1G02070	zinc ion-binding protein
AT1G02074	AT1G02074	-	1:372063-372210	Col0Mocka_dir	Col0HrcCa_dir	NOTEST	0	0	0	0	1	1	no
AT1G02080	AT1G02080	-	1:373334-386847	Col0Mocka_dir	Col0HrcCa_dir	OK	8.62803	6.61831	-0.382568	-1.2018	0.066	0.330244	no	AT1G02080	transcription regulator
AT1G02090	AT1G02090	-	1:387276-389647	Col0Mocka_dir	Col0HrcCa_dir	OK	6.23819	6.50397	0.0601916	0.147447	0.8166	0.949108	no	FUS5	Proteasome component (PCI) domain protein
AT1G02100	AT1G02100	-	1:389811-392816	Col0Mocka_dir	Col0HrcCa_dir	OK	11.6774	9.80631	-0.251942	-0.720578	0.26705	0.639804	no	SBI1	Leucine carboxyl methyltransferase
AT1G02110	AT1G02110	-	1:392830-395528	Col0Mocka_dir	Col0HrcCa_dir	OK	12.4625	9.98481	-0.319791	-0.99933	0.14245	0.48285	no	AT1G02110	bZIP domain class transcription factor (DUF630 and DUF632)
AT1G02120	AT1G02120	-	1:395760-399897	Col0Mocka_dir	Col0HrcCa_dir	OK	15.9762	16.849	0.0767429	0.237125	0.71325	0.910361	no	VAD1	GRAM domain family protein
AT1G02130	AT1G02130	-	1:400034-401882	Col0Mocka_dir	Col0HrcCa_dir	OK	19.8291	15.2889	-0.375135	-1.0687	0.09965	0.404678	no	RA-5	RAS 5
AT1G02140	AT1G02140	-	1:403189-404456	Col0Mocka_dir	Col0HrcCa_dir	OK	42.3071	43.2275	0.0310501	0.0949977	0.8865	0.973362	no	MAGO	mago nashi family protein
AT1G02145	AT1G02145	-	1:404599-408619	Col0Mocka_dir	Col0HrcCa_dir	OK	2.043	2.07229	0.0205371	0.0417233	0.95125	0.989812	no	ALG12	homolog of asparagine-linked glycosylation 12
AT1G02150	AT1G02150	-	1:408621-410611	Col0Mocka_dir	Col0HrcCa_dir	OK	69.3467	66.8045	-0.0538825	-0.169224	0.7886	0.939098	no	AT1G02150	Tetratricopeptide repeat (TPR)-like superfamily protein
AT1G02160	AT1G02160	-	1:410747-411597	Col0Mocka_dir	Col0HrcCa_dir	OK	19.4323	22.7218	0.225618	0.548716	0.3862	0.737859	no	AT1G02160	Cox19 family protein (CHCH motif)
AT1G02170	AT1G02170	-	1:411778-414645	Col0Mocka_dir	Col0HrcCa_dir	OK	11.0209	11.8346	0.102776	0.216463	0.7298	0.917102	no	MC1	metacaspase 1
AT1G02180	AT1G02180	-	1:411778-414645	Col0Mocka_dir	Col0HrcCa_dir	OK	6.57029	6.8782	0.0660751	0.0661848	0.9089	0.978214	no	AT1G02180	ferredoxin-like protein
AT1G02190	AT1G02190	-	1:415078-418010	Col0Mocka_dir	Col0HrcCa_dir	NOTEST	0.178085	0.0843561	-1.078	0	1	1	no	AT1G02190	Fatty acid hydroxylase superfamily
AT1G02205	AT1G02205	-	1:418747-422438	Col0Mocka_dir	Col0HrcCa_dir	OK	5.6681	3.84798	-0.558763	-1.43349	0.02585	0.190731	no	CER1	Fatty acid hydroxylase superfamily
AT1G02210	AT1G02210	-	1:427547-427811	Col0Mocka_dir	Col0HrcCa_dir	NOTEST	0	0	0	0	1	1	no	AT1G02210	NAC (No Apical Meristem) domain transcriptional regulator superfamily protein
AT1G02220	AT1G02220	-	1:428813-430647	Col0Mocka_dir	Col0HrcCa_dir	OK	7.32624	7.13645	-0.0378662	-0.0892879	0.89205	0.97553	no	NAC003	NAC domain containing protein 3
AT1G02230	AT1G02230	-	1:435173-436776	Col0Mocka_dir	Col0HrcCa_dir	NOTEST	0.199945	0.16772	-0.253543	0	1	1	no	NAC004	NAC domain containing protein 4
AT1G02250	AT1G02250	-	1:437950-439559	Col0Mocka_dir	Col0HrcCa_dir	NOTEST	0.0238076	0.0524094	1.1384	0	1	1	no	NAC005	NAC domain containing protein 5
AT1G02260	AT1G02260	-	1:440440-442877	Col0Mocka_dir	Col0HrcCa_dir	OK	8.8892	10.6704	0.263485	0.722752	0.26005	0.633016	no	AT1G02260	Divalent ion symporter
AT1G02270	AT1G02270	-	1:443148-446235	Col0Mocka_dir	Col0HrcCa_dir	OK	7.51857	6.83771	-0.136946	-0.358926	0.56325	0.844657	no	AT1G02270	Calcium-binding endonuclease/exonuclease/phosphatase family
AT1G02280	AT1G02280	-	1:448462-450426	Col0Mocka_dir	Col0HrcCa_dir	OK	34.1645	24.6022	-0.47371	-1.44993	0.0263	0.192288	no	TOC33	translocon at the outer envelope membrane of chloroplasts 33
AT1G02290	AT1G02290	-	1:450526-452737	Col0Mocka_dir	Col0HrcCa_dir	OK	5.3811	4.3966	-0.291515	-0.646066	0.31485	0.685713	no	AT1G02290	hypothetical protein
AT1G02300	AT1G02300	-	1:453287-455463	Col0Mocka_dir	Col0HrcCa_dir	OK	4.38149	6.35257	0.535918	1.20791	0.0608	0.316752	no	AT1G02300	Cysteine proteinases superfamily protein
AT1G02305	AT1G02305	-	1:455687-460696	Col0Mocka_dir	Col0HrcCa_dir	OK	13.1456	14.0755	0.0985992	0.272262	0.67485	0.894623	no	AT1G02305	Cysteine proteinases superfamily protein
AT1G02310	AT1G02310	-	1:455687-460696	Col0Mocka_dir	Col0HrcCa_dir	OK	1.51467	1.49126	-0.0224724	-0.0208636	0.9733	0.994126	no	MAN1	Glycosyl hydrolase superfamily protein
AT1G02320	AT1G02320	-	1:461827-461974	Col0Mocka_dir	Col0HrcCa_dir	NOTEST	0	0	0	0	1	1	no	AT1G02320	hypothetical protein
AT1G02330	AT1G02330	-	1:462074-463612	Col0Mocka_dir	Col0HrcCa_dir	OK	13.4902	12.0091	-0.167785	-0.470599	0.4743	0.793776	no	AT1G02330	integrator complex subunit-like protein
AT1G02335	AT1G02335	-	1:463854-464924	Col0Mocka_dir	Col0HrcCa_dir	OK	9.00614	10.2332	0.184274	0.38092	0.5527	0.839098	no	GL22	germin-like protein subfamily 2 member 2 precursor
AT1G02340	AT1G02340	-	1:465717-467844	Col0Mocka_dir	Col0HrcCa_dir	OK	1.2449	0.962869	-0.370613	-0.46684	0.5101	0.815832	no	HFR1	basic helix-loop-helix (bHLH) DNA-binding superfamily protein
AT1G02350	AT1G02350	-	1:469817-470693	Col0Mocka_dir	Col0HrcCa_dir	OK	1.95311	2.63853	0.433959	0.461509	0.47045	0.790955	no	AT1G02350	protoporphyrinogen oxidase-like protein
AT1G02360	AT1G02360	-	1:471989-473160	Col0Mocka_dir	Col0HrcCa_dir	OK	15.566	16.5031	0.0843395	0.215979	0.72875	0.916853	no	AT1G02360	Chitinase family protein
AT1G02370	AT1G02370	-	1:474499-476511	Col0Mocka_dir	Col0HrcCa_dir	OK	4.59336	5.50903	0.262248	0.596503	0.3489	0.712998	no	AT1G02370	Tetratricopeptide repeat (TPR)-like superfamily protein
AT1G02380	AT1G02380	-	1:476999-478971	Col0Mocka_dir	Col0HrcCa_dir	OK	0.866604	2.0489	1.24141	1.60296	0.0196	0.159425	no	AT1G02380	transmembrane protein
AT1G02390	AT1G02390	-	1:480851-483292	Col0Mocka_dir	Col0HrcCa_dir	NOTEST	0.699957	0.596273	-0.231293	0	1	1	no	GPAT2	glycerol-3-phosphate acyltransferase 2
AT1G02391	AT1G02391	-	1:483763-483919	Col0Mocka_dir	Col0HrcCa_dir	NOTEST	0	0	0	0	1	1	no
AT1G02400	AT1G02400	-	1:486800-489577	Col0Mocka_dir	Col0HrcCa_dir	OK	2.98187	2.41894	-0.30184	-0.594607	0.34385	0.709413	no	GA2OX6	gibberellin 2-oxidase 6
AT1G02405	AT1G02405	-	1:489978-490505	Col0Mocka_dir	Col0HrcCa_dir	NOTEST	0.544824	0.699452	0.360435	0	1	1	no	AT1G02405	proline-rich family protein
AT1G02410	AT1G02410	-	1:490924-492926	Col0Mocka_dir	Col0HrcCa_dir	OK	6.51628	6.73593	0.0478277	0.112636	0.86015	0.964266	no	AT1G02410	cytochrome c oxidase assembly protein CtaG / Cox11 family
AT1G02420	AT1G02420	-	1:493682-496062	Col0Mocka_dir	Col0HrcCa_dir	OK	1.15234	1.7332	0.588871	0.607145	0.36	0.720307	no	AT1G02420	Pentatricopeptide repeat (PPR) superfamily protein
AT1G02430	AT1G02430	-	1:493682-496062	Col0Mocka_dir	Col0HrcCa_dir	OK	6.95483	5.18589	-0.423424	-0.703653	0.26815	0.640696	no	ARFD1B	ADP-ribosylation factor D1B
AT1G02440	AT1G02440	-	1:496585-497479	Col0Mocka_dir	Col0HrcCa_dir	NOTEST	0.489981	0.462262	-0.0840135	0	1	1	no	ARFD1A	ADP-ribosylation factor D1A
AT1G02450	AT1G02450	-	1:497975-498516	Col0Mocka_dir	Col0HrcCa_dir	OK	1.30074	0.658006	-0.983164	-0.69021	0.4078	0.75258	no	NIMIN1	NIM1-interacting 1
AT1G02460	AT1G02460	-	1:504672-507204	Col0Mocka_dir	Col0HrcCa_dir	OK	0.572541	0.994157	0.796096	0.926726	0.1573	0.506597	no	AT1G02460	Pectin lyase-like superfamily protein
AT1G02470	AT1G02470	-	1:511764-513624	Col0Mocka_dir	Col0HrcCa_dir	NOTEST	0.687442	0.688947	0.00315485	0	1	1	no	AT1G02470	Polyketide cyclase/dehydrase and lipid transport superfamily protein
AT1G02475	AT1G02475	-	1:513842-515404	Col0Mocka_dir	Col0HrcCa_dir	OK	1.45672	3.43985	1.23962	1.7984	0.0271	0.195627	no	AT1G02475	Polyketide cyclase/dehydrase and lipid transport superfamily protein
AT1G02490	AT1G02490	-	1:516617-516734	Col0Mocka_dir	Col0HrcCa_dir	NOTEST	0	0	0	0	1	1	no	AT1G02490	hypothetical protein
AT1G02500	AT1G02500	-	1:518250-520437	Col0Mocka_dir	Col0HrcCa_dir	OK	460.363	388.843	-0.243584	-0.720676	0.274	0.646069	no	SAM1	S-adenosylmethionine synthetase 1
AT1G02510	AT1G02510	-	1:520497-521668	Col0Mocka_dir	Col0HrcCa_dir	NOTEST	0	0	0	0	1	1	no	TPK4	Outward rectifying potassium channel protein
AT1G02520	AT1G02520	-	1:523650-528745	Col0Mocka_dir	Col0HrcCa_dir	OK	1.59123	2.33861	0.555509	1.25372	0.051	0.286662	no	ABCB11	P-glycoprotein 11
AT1G02530	AT1G02530	-	1:529794-534677	Col0Mocka_dir	Col0HrcCa_dir	NOTEST	0.0559369	0.0656022	0.229944	0	1	1	no	ABCB12	P-glycoprotein 12
AT1G02540	AT1G02540	-	1:534826-535699	Col0Mocka_dir	Col0HrcCa_dir	NOTEST	0	0	0	0	1	1	no	AT1G02540	hypothetical protein
AT1G02550	AT1G02550	-	1:536482-537211	Col0Mocka_dir	Col0HrcCa_dir	NOTEST	0	0.130623	inf	0	1	1	no	AT1G02550	Plant invertase/pectin methylesterase inhibitor superfamily protein
AT1G02560	AT1G02560	-	1:537859-540109	Col0Mocka_dir	Col0HrcCa_dir	OK	176.181	137.159	-0.361216	-1.14314	0.08485	0.372867	no	CLPP5	nuclear encoded CLP protease 5
AT1G02570	AT1G02570	-	1:541334-542240	Col0Mocka_dir	Col0HrcCa_dir	NOTEST	0	0.692998	inf	0	1	1	no	AT1G02570	transmembrane protein
AT1G02575	AT1G02575	-	1:543109-544007	Col0Mocka_dir	Col0HrcCa_dir	NOTEST	0	0.560728	inf	0	1	1	no	AT1G02575	transmembrane protein
AT1G02580	AT1G02580	-	1:544782-549202	Col0Mocka_dir	Col0HrcCa_dir	NOTEST	0.0259773	0.0409276	0.655825	0	1	1	no	MEA	SET domain-containing protein
AT1G02590	AT1G02590	-	1:552137-552761	Col0Mocka_dir	Col0HrcCa_dir	NOTEST	0	0	0	0	1	1	no	AT1G02590	Aldehyde oxidase/xanthine dehydrogenase, molybdopterin binding protein
AT1G02610	AT1G02610	-	1:553049-555994	Col0Mocka_dir	Col0HrcCa_dir	OK	0.935087	5.13578	2.45741	4.17482	5e-05	0.00142045	yes	AT1G02610	RING/FYVE/PHD zinc finger superfamily protein
AT1G02620	AT1G02620	-	1:557091-557986	Col0Mocka_dir	Col0HrcCa_dir	NOTEST	0	0.546693	inf	0	1	1	no	AT1G02620	Ras-related small GTP-binding family protein
AT1G02630	AT1G02630	-	1:560609-562424	Col0Mocka_dir	Col0HrcCa_dir	NOTEST	0.0177344	0.0560423	1.65997	0	1	1	no	AT1G02630	Nucleoside transporter family protein
AT1G02640	AT1G02640	-	1:564204-567769	Col0Mocka_dir	Col0HrcCa_dir	OK	4.06375	6.76535	0.735354	1.93701	0.004	0.0527929	no	BXL2	beta-xylosidase 2
AT1G02650	AT1G02650	-	1:568703-570418	Col0Mocka_dir	Col0HrcCa_dir	OK	0.870898	1.41289	0.698076	0.830021	0.2102	0.578087	no	AT1G02650	Tetratricopeptide repeat (TPR)-like superfamily protein
AT1G02660	AT1G02660	-	1:571954-574981	Col0Mocka_dir	Col0HrcCa_dir	OK	0.81757	10.7154	3.7122	6.73903	5e-05	0.00142045	yes	AT1G02660	alpha/beta-Hydrolases superfamily protein
AT1G02670	AT1G02670	-	1:576045-580299	Col0Mocka_dir	Col0HrcCa_dir	NOTEST	0.116207	0.194934	0.746292	0	1	1	no	AT1G02670	P-loop containing nucleoside triphosphate hydrolases superfamily protein
AT1G02680	AT1G02680	-	1:580624-582310	Col0Mocka_dir	Col0HrcCa_dir	OK	9.29242	8.12898	-0.19298	-0.469501	0.46085	0.787003	no	TAF13	TBP-associated factor 13
AT1G02690	AT1G02690	-	1:584259-587219	Col0Mocka_dir	Col0HrcCa_dir	OK	11.4287	8.04225	-0.506987	-1.41912	0.02505	0.187247	no	IMPA-6	importin alpha isoform 6
AT1G02700	AT1G02700	-	1:588328-589480	Col0Mocka_dir	Col0HrcCa_dir	OK	0.709317	0.35166	-1.01225	-0.724596	0.19405	0.557905	no	AT1G02700	GATA transcription factor-like protein
AT1G02710	AT1G02710	-	1:589705-589996	Col0Mocka_dir	Col0HrcCa_dir	OK	12.01	11.1036	-0.113215	-0.166446	0.8343	0.954965	no	AT1G02710	glycine-rich protein
AT1G02720	AT1G02720	-	1:591825-594236	Col0Mocka_dir	Col0HrcCa_dir	OK	5.31768	5.54639	0.0607533	0.144185	0.8186	0.949496	no	GATL5	galacturonosyltransferase 5
AT1G02730	AT1G02730	-	1:594572-598657	Col0Mocka_dir	Col0HrcCa_dir	OK	10.1172	9.68892	-0.0623998	-0.187091	0.7703	0.931214	no	CSLD5	cellulose synthase-like D5
AT1G02740	AT1G02740	-	1:599415-602038	Col0Mocka_dir	Col0HrcCa_dir	OK	1.14538	1.37358	0.262111	0.387588	0.55335	0.839427	no	AT1G02740	MRG family protein
AT1G02750	AT1G02750	-	1:602496-604292	Col0Mocka_dir	Col0HrcCa_dir	OK	13.4354	11.5759	-0.214912	-0.572919	0.3762	0.730982	no	AT1G02750	Drought-responsive family protein
AT1G02770	AT1G02770	-	1:604872-606693	Col0Mocka_dir	Col0HrcCa_dir	NOTEST	0.300843	0.243909	-0.302668	0	1	1	no	AT1G02770	hypothetical protein
AT1G02780	AT1G02780	-	1:607807-609465	Col0Mocka_dir	Col0HrcCa_dir	OK	207.655	245.414	0.241029	0.736104	0.2513	0.624908	no	emb2386	Ribosomal protein L19e family protein
AT1G02790	AT1G02790	-	1:610390-612324	Col0Mocka_dir	Col0HrcCa_dir	NOTEST	0	0	0	0	1	1	no	PGA4	polygalacturonase 4
AT1G02800	AT1G02800	-	1:613215-616191	Col0Mocka_dir	Col0HrcCa_dir	OK	1.7674	0.945545	-0.902407	-1.38379	0.0422	0.25503	no	CEL2	cellulase 2
AT1G02810	AT1G02810	-	1:618264-620480	Col0Mocka_dir	Col0HrcCa_dir	OK	4.5369	4.27517	-0.0857249	-0.195628	0.77285	0.93197	no	AT1G02810	Plant invertase/pectin methylesterase inhibitor superfamily
AT1G02813	AT1G02813	-	1:620677-621289	Col0Mocka_dir	Col0HrcCa_dir	NOTEST	0.790962	0.471285	-0.747009	0	1	1	no	AT1G02813	pectinesterase (Protein of unknown function, DUF538)
AT1G02816	AT1G02816	-	1:621460-622469	Col0Mocka_dir	Col0HrcCa_dir	OK	23.3657	30.5817	0.388281	1.05901	0.09825	0.401856	no	AT1G02816	pectinesterase (Protein of unknown function, DUF538)
AT1G02820	AT1G02820	-	1:623764-624475	Col0Mocka_dir	Col0HrcCa_dir	OK	106.387	35.7963	-1.57144	-4.3015	5e-05	0.00142045	yes	LEA3	Late embryogenesis abundant 3 (LEA3) family protein
AT1G02830	AT1G02830	-	1:625144-625608	Col0Mocka_dir	Col0HrcCa_dir	NOTEST	0	0.0572698	inf	0	1	1	no	AT1G02830	Ribosomal L22e protein family
AT1G02840	AT1G02840	-	1:626740-629819	Col0Mocka_dir	Col0HrcCa_dir	OK	12.0692	13.7892	0.19221	0.574537	0.3657	0.723546	no	SR34	RNA-binding (RRM/RBD/RNP motifs) family protein
AT1G02850	AT1G02850	-	1:630504-633259	Col0Mocka_dir	Col0HrcCa_dir	OK	6.54991	13.6904	1.06361	2.92439	5e-05	0.00142045	yes	BGLU11	beta glucosidase 11
AT1G02860	AT1G02860	-	1:635143-638677	Col0Mocka_dir	Col0HrcCa_dir	OK	2.35659	2.1537	-0.129881	-0.149611	0.8124	0.948039	no	NLA	SPX (SYG1/Pho81/XPR1) domain-containing protein
AT1G02870	AT1G02870	-	1:635143-638677	Col0Mocka_dir	Col0HrcCa_dir	OK	12.448	11.8617	-0.0696063	-0.162549	0.80355	0.944765	no	AT1G02870	nucleolar-like protein
AT1G02880	AT1G02880	-	1:642751-644903	Col0Mocka_dir	Col0HrcCa_dir	OK	17.5256	17.8456	0.0261078	0.0775634	0.907	0.97775	no	TPK1	thiamin pyrophosphokinase1
AT1G02890	AT1G02890	-	1:645091-651907	Col0Mocka_dir	Col0HrcCa_dir	OK	2.54225	2.6666	0.0688984	0.180006	0.78055	0.935318	no	AT1G02890	AAA-type ATPase family protein
AT1G02900	AT1G02900	-	1:653764-654343	Col0Mocka_dir	Col0HrcCa_dir	OK	72.8134	84.2566	0.210587	0.647183	0.34065	0.707633	no	RALF1	rapid alkalinization factor 1
AT1G02910	AT1G02910	-	1:655576-658148	Col0Mocka_dir	Col0HrcCa_dir	OK	11.6404	10.5243	-0.145407	-0.412436	0.5201	0.823034	no	LPA1	tetratricopeptide repeat (TPR)-containing protein
AT1G02920	AT1G02920	-	1:658656-659771	Col0Mocka_dir	Col0HrcCa_dir	OK	11.0143	59.1731	2.42557	6.25647	5e-05	0.00142045	yes	GSTF7	glutathione S-transferase 7
AT1G02930	AT1G02930	-	1:661176-662456	Col0Mocka_dir	Col0HrcCa_dir	OK	53.7378	215.057	2.00071	6.1321	5e-05	0.00142045	yes	GSTF6	glutathione S-transferase 6
AT1G02940	AT1G02940	-	1:663078-664128	Col0Mocka_dir	Col0HrcCa_dir	OK	0.660556	1.45362	1.1379	0.950058	0.165	0.518384	no	GSTF5	glutathione S-transferase (class phi) 5
AT1G02950	AT1G02950	-	1:665151-666452	Col0Mocka_dir	Col0HrcCa_dir	OK	14.5564	11.847	-0.297132	-0.734868	0.253	0.626598	no	GSTF4	glutathione S-transferase F4
AT1G02960	AT1G02960	-	1:666871-669837	Col0Mocka_dir	Col0HrcCa_dir	OK	3.31296	4.27699	0.368476	0.840509	0.19	0.552326	no	AT1G02960	kinetochore protein
AT1G02965	AT1G02965	-	1:671660-672814	Col0Mocka_dir	Col0HrcCa_dir	NOTEST	0	0	0	0	1	1	no	AT1G02965	hypothetical protein
AT1G02970	AT1G02970	-	1:673305-676378	Col0Mocka_dir	Col0HrcCa_dir	OK	1.50833	1.31551	-0.197332	-0.322097	0.6256	0.870575	no	WEE1	WEE1-like kinase
AT1G02980	AT1G02980	-	1:677868-681310	Col0Mocka_dir	Col0HrcCa_dir	NOTEST	0.0886679	0.0287374	-1.62548	0	1	1	no	CUL2	cullin 2
AT1G02990	AT1G02990	-	1:681395-687315	Col0Mocka_dir	Col0HrcCa_dir	OK	2.77749	3.75228	0.433986	1.15493	0.07055	0.3413	no	AT1G02990	hypothetical protein
AT1G03000	AT1G03000	-	1:687889-692560	Col0Mocka_dir	Col0HrcCa_dir	OK	2.59173	3.01184	0.216731	0.520708	0.42515	0.765333	no	PEX6	peroxin 6
AT1G03010	AT1G03010	-	1:693479-696382	Col0Mocka_dir	Col0HrcCa_dir	NOTEST	0.353286	0.593695	0.748886	0	1	1	no	AT1G03010	Phototropic-responsive NPH3 family protein
AT1G03020	AT1G03020	-	1:698206-698515	Col0Mocka_dir	Col0HrcCa_dir	OK	0.36285	1.57351	2.11655	0.925021	0.27495	0.6476	no	AT1G03020	Thioredoxin superfamily protein
AT1G03022	AT1G03022	-	1:699120-699246	Col0Mocka_dir	Col0HrcCa_dir	NOTEST	0	0	0	0	1	1	no
AT1G03030	AT1G03030	-	1:701477-703864	Col0Mocka_dir	Col0HrcCa_dir	OK	4.51148	4.47525	-0.0116323	-0.0259978	0.96755	0.993075	no	AT1G03030	P-loop containing nucleoside triphosphate hydrolases superfamily protein
AT1G03040	AT1G03040	-	1:703905-706631	Col0Mocka_dir	Col0HrcCa_dir	OK	21.8948	19.4955	-0.167443	-0.516694	0.42175	0.762471	no	AT1G03040	basic helix-loop-helix (bHLH) DNA-binding superfamily protein
AT1G03050	AT1G03050	-	1:707725-711803	Col0Mocka_dir	Col0HrcCa_dir	NOTEST	0.0174351	0.133626	2.93814	0	1	1	no	AT1G03050	ENTH/ANTH/VHS superfamily protein
AT1G03055	AT1G03055	-	1:707725-711803	Col0Mocka_dir	Col0HrcCa_dir	OK	1.66291	1.64324	-0.0171706	-0.0229385	0.9724	0.993725	no	D27	beta-carotene isomerase D27-like protein
AT1G03060	AT1G03060	-	1:712472-726891	Col0Mocka_dir	Col0HrcCa_dir	OK	4.06172	4.72745	0.218971	0.677198	0.29105	0.663531	no	SPI	BEACH-DOMAIN HOMOLOG A1
AT1G03070	AT1G03070	-	1:729900-731557	Col0Mocka_dir	Col0HrcCa_dir	NOTEST	0.330883	0.578054	0.804884	0	1	1	no	AT1G03070	Bax inhibitor-1 family protein
AT1G03080	AT1G03080	-	1:731610-738056	Col0Mocka_dir	Col0HrcCa_dir	OK	14.7215	18.8124	0.353754	1.16747	0.08885	0.382804	no	NET1D	kinase interacting (KIP1-like) family protein
AT1G03090	AT1G03090	-	1:739678-746479	Col0Mocka_dir	Col0HrcCa_dir	OK	2.41688	3.08753	0.353311	0.751877	0.2412	0.61361	no	MCCA	methylcrotonyl-CoA carboxylase alpha chain
AT1G03100	AT1G03100	-	1:739678-746479	Col0Mocka_dir	Col0HrcCa_dir	OK	0.961269	1.36036	0.500974	0.498097	0.42265	0.763457	no	AT1G03100	Pentatricopeptide repeat (PPR) superfamily protein
AT1G03103	AT1G03103	-	1:747196-748057	Col0Mocka_dir	Col0HrcCa_dir	NOTEST	0	0	0	0	1	1	no	AT1G03103	Bifunctional inhibitor/lipid-transfer protein/seed storage 2S albumin superfamily protein
AT1G03106	AT1G03106	-	1:748101-749034	Col0Mocka_dir	Col0HrcCa_dir	OK	1.02205	0.40691	-1.32869	-0.861582	0.22445	0.5949	no	AT1G03106	hypothetical protein
AT1G03110	AT1G03110	-	1:749245-751963	Col0Mocka_dir	Col0HrcCa_dir	OK	6.13146	6.69765	0.127424	0.323238	0.61585	0.866906	no	TRM82	Transducin/WD40 repeat-like superfamily protein
AT1G03120	AT1G03120	-	1:752270-753140	Col0Mocka_dir	Col0HrcCa_dir	NOTEST	0.30714	0.373849	0.283559	0	1	1	no	RAB28	responsive to abscisic acid 28
AT1G03130	AT1G03130	-	1:753306-754198	Col0Mocka_dir	Col0HrcCa_dir	OK	1267.8	1310.57	0.047865	0.144998	0.8276	0.952975	no	PSAD-2	photosystem I subunit D-2
AT1G03140	AT1G03140	-	1:754370-756303	Col0Mocka_dir	Col0HrcCa_dir	OK	28.3038	28.9939	0.0347549	0.111841	0.8678	0.966856	no	AT1G03140	splicing factor Prp18 family protein
AT1G03150	AT1G03150	-	1:756413-758612	Col0Mocka_dir	Col0HrcCa_dir	OK	4.94748	3.53412	-0.485343	-0.981522	0.12095	0.446959	no	AT1G03150	Acyl-CoA N-acyltransferases (NAT) superfamily protein
AT1G03160	AT1G03160	-	1:761281-766158	Col0Mocka_dir	Col0HrcCa_dir	OK	7.02014	7.90329	0.170953	0.505998	0.4348	0.770112	no	FZL	FZO-like protein
AT1G03170	AT1G03170	-	1:769631-770684	Col0Mocka_dir	Col0HrcCa_dir	OK	1.83028	0.681132	-1.42606	-1.42806	0.04285	0.257512	no	FAF2	FANTASTIC four-like protein (DUF3049)
AT1G03180	AT1G03180	-	1:773410-775344	Col0Mocka_dir	Col0HrcCa_dir	OK	1.25987	1.88637	0.582334	0.806068	0.2094	0.577198	no	AT1G03180	non-structural protein
AT1G03190	AT1G03190	-	1:775526-780062	Col0Mocka_dir	Col0HrcCa_dir	OK	1.54697	1.58129	0.0316596	0.0628668	0.9221	0.981899	no	UVH6	RAD3-like DNA-binding helicase protein
AT1G03200	AT1G03200	-	1:780601-781285	Col0Mocka_dir	Col0HrcCa_dir	OK	0.0891181	1.32324	3.89221	1.47027	0.20465	0.570574	no	AT1G03200	hypothetical protein
AT1G03210	AT1G03210	-	1:782947-784240	Col0Mocka_dir	Col0HrcCa_dir	OK	9.01866	11.0372	0.291395	0.673883	0.2942	0.666993	no	AT1G03210	Phenazine biosynthesis PhzC/PhzF protein
AT1G03220	AT1G03220	-	1:787121-788651	Col0Mocka_dir	Col0HrcCa_dir	OK	79.3526	92.9379	0.22799	0.723061	0.26475	0.637567	no	AT1G03220	Eukaryotic aspartyl protease family protein
AT1G03230	AT1G03230	-	1:790090-791592	Col0Mocka_dir	Col0HrcCa_dir	OK	20.5758	22.5382	0.131424	0.391093	0.5513	0.838417	no	AT1G03230	Eukaryotic aspartyl protease family protein
AT1G03240	AT1G03240	-	1:792221-792986	Col0Mocka_dir	Col0HrcCa_dir	NOTEST	0	0	0	0	1	1	no	AT1G03240	hypothetical protein
AT1G03250	AT1G03250	-	1:793352-795376	Col0Mocka_dir	Col0HrcCa_dir	OK	17.8506	14.2912	-0.320847	-0.92152	0.15205	0.498978	no	AT1G03250	R3H domain protein
AT1G03260	AT1G03260	-	1:795531-798463	Col0Mocka_dir	Col0HrcCa_dir	OK	4.01147	3.6551	-0.13422	-0.301153	0.644	0.880173	no	AT1G03260	SNARE associated Golgi protein family
AT1G03270	AT1G03270	-	1:799190-802436	Col0Mocka_dir	Col0HrcCa_dir	OK	1.03042	0.687888	-0.582986	-0.776308	0.23765	0.609298	no	AT1G03270	CBS domain protein with a domain protein (DUF21)
AT1G03280	AT1G03280	-	1:803034-807066	Col0Mocka_dir	Col0HrcCa_dir	OK	7.52968	7.10789	-0.0831668	-0.240036	0.71455	0.910936	no	AT1G03280	Transcription factor TFIIE, alpha subunit
AT1G03290	AT1G03290	-	1:807360-810868	Col0Mocka_dir	Col0HrcCa_dir	OK	9.56999	7.99098	-0.260146	-0.740477	0.23655	0.607941	no	AT1G03290	ELKS/Rab6-interacting/CAST family protein
AT1G03300	AT1G03300	-	1:811032-813086	Col0Mocka_dir	Col0HrcCa_dir	OK	2.04241	3.33607	0.707875	1.3596	0.0372	0.236311	no	ATDUF1	agenet domain protein (DOMAIN OF UNKNOWN FUNCTION 724 1)
AT1G03310	AT1G03310	-	1:813470-816749	Col0Mocka_dir	Col0HrcCa_dir	OK	31.2264	23.4201	-0.415018	-1.30173	0.0442	0.262049	no	DBE1	debranching enzyme 1
AT1G03320	AT1G03320	-	1:817026-817767	Col0Mocka_dir	Col0HrcCa_dir	OK	1.70745	0.876744	-0.961612	-0.867436	0.2026	0.568236	no	AT1G03320	hypothetical protein
AT1G03330	AT1G03330	-	1:817982-819563	Col0Mocka_dir	Col0HrcCa_dir	OK	33.0895	28.0115	-0.240352	-0.711779	0.2702	0.642153	no	LSM2	Small nuclear ribonucleoprotein family protein
AT1G03340	AT1G03340	-	1:819661-821317	Col0Mocka_dir	Col0HrcCa_dir	OK	1.51592	2.42701	0.678986	0.94599	0.15075	0.496558	no	AT1G03340	hypothetical protein
AT1G03350	AT1G03350	-	1:822637-824393	Col0Mocka_dir	Col0HrcCa_dir	OK	16.7939	18.6661	0.152487	0.468674	0.47755	0.795028	no	AT1G03350	BSD domain-containing protein
AT1G03360	AT1G03360	-	1:824536-826358	Col0Mocka_dir	Col0HrcCa_dir	OK	11.2266	11.459	0.0295641	0.0784916	0.90165	0.977258	no	RRP4	ribosomal RNA processing 4
AT1G03365	AT1G03365	-	1:826568-830383	Col0Mocka_dir	Col0HrcCa_dir	OK	6.32692	6.41912	0.0208719	0.059017	0.92475	0.982936	no	AT1G03365	RING/U-box superfamily protein
AT1G03370	AT1G03370	-	1:830626-835361	Col0Mocka_dir	Col0HrcCa_dir	OK	3.66353	5.64192	0.622952	1.70883	0.0076	0.084384	no	AT1G03370	C2 calcium/lipid-binding and GRAM domain containing protein
AT1G03380	AT1G03380	-	1:835784-840940	Col0Mocka_dir	Col0HrcCa_dir	OK	7.20719	6.99425	-0.0432682	-0.127021	0.84075	0.957194	no	ATG18G	yeast autophagy 18 G-like protein
AT1G03390	AT1G03390	-	1:841032-842418	Col0Mocka_dir	Col0HrcCa_dir	NOTEST	0.0813209	0.0260538	-1.64213	0	1	1	no	AT1G03390	HXXXD-type acyl-transferase family protein
AT1G03400	AT1G03400	-	1:842746-844190	Col0Mocka_dir	Col0HrcCa_dir	OK	7.93033	9.40828	0.24655	0.594616	0.3582	0.719881	no	AT1G03400	2-oxoglutarate (2OG) and Fe(II)-dependent oxygenase superfamily protein
AT1G03410	AT1G03410	-	1:844435-847683	Col0Mocka_dir	Col0HrcCa_dir	OK	18.3729	19.2033	0.0637723	0.19935	0.7538	0.924418	no	2A6	2-oxoglutarate (2OG) and Fe(II)-dependent oxygenase superfamily protein
AT1G03430	AT1G03430	-	1:847872-849500	Col0Mocka_dir	Col0HrcCa_dir	OK	6.88177	7.61805	0.146642	0.333139	0.6151	0.866669	no	AHP5	histidine-containing phosphotransfer factor 5
AT1G03440	AT1G03440	-	1:852365-854032	Col0Mocka_dir	Col0HrcCa_dir	OK	16.866	13.9135	-0.277631	-0.761743	0.23685	0.608213	no	AT1G03440	Leucine-rich repeat (LRR) family protein
AT1G03445	AT1G03445	-	1:854409-859701	Col0Mocka_dir	Col0HrcCa_dir	NOTEST	0.257031	0.200248	-0.360152	0	1	1	no	BSU1	Serine/threonine protein phosphatase family protein
AT1G03457	AT1G03457	-	1:860787-864125	Col0Mocka_dir	Col0HrcCa_dir	OK	3.24886	4.16046	0.35681	0.839837	0.19035	0.552762	no	AT1G03457	RNA-binding (RRM/RBD/RNP motifs) family protein
AT1G03470	AT1G03470	-	1:865914-867733	Col0Mocka_dir	Col0HrcCa_dir	OK	5.76594	6.0118	0.0602418	0.139184	0.8272	0.952911	no	NET3A	Kinase interacting (KIP1-like) family protein
AT1G03475	AT1G03475	-	1:869050-871211	Col0Mocka_dir	Col0HrcCa_dir	OK	72.8247	61.5213	-0.243343	-0.755655	0.2433	0.616604	no	LIN2	Coproporphyrinogen III oxidase
AT1G03490	AT1G03490	-	1:871873-872906	Col0Mocka_dir	Col0HrcCa_dir	NOTEST	0	0	0	0	1	1	no	NAC006	NAC domain containing protein 6
AT1G03495	AT1G03495	-	1:873183-874935	Col0Mocka_dir	Col0HrcCa_dir	OK	14.0856	21.9846	0.642268	1.71121	0.00745	0.0831473	no	AT1G03495	HXXXD-type acyl-transferase family protein
AT1G03510	AT1G03510	-	1:876257-877547	Col0Mocka_dir	Col0HrcCa_dir	OK	1.17186	1.65144	0.494924	0.554324	0.3933	0.742781	no	AT1G03510	Tetratricopeptide repeat (TPR)-like superfamily protein
AT1G03520	AT1G03520	-	1:877861-880158	Col0Mocka_dir	Col0HrcCa_dir	OK	9.18206	11.2719	0.29584	0.802814	0.2207	0.590261	no	AT1G03520	Core-2/I-branching beta-1,6-N-acetylglucosaminyltransferase family protein
AT1G03530	AT1G03530	-	1:880495-883391	Col0Mocka_dir	Col0HrcCa_dir	OK	6.00789	6.95343	0.210866	0.579301	0.372	0.728398	no	NAF1	nuclear assembly factor 1
AT1G03540	AT1G03540	-	1:883781-885611	Col0Mocka_dir	Col0HrcCa_dir	NOTEST	0.315508	0.334312	0.0835184	0	1	1	no	AT1G03540	Pentatricopeptide repeat (PPR-like) superfamily protein
AT1G03550	AT1G03550	-	1:885622-887956	Col0Mocka_dir	Col0HrcCa_dir	OK	6.4509	4.92285	-0.390005	-0.91176	0.15615	0.504992	no	SCAMP4	Secretory carrier membrane protein (SCAMP) family protein
AT1G03560	AT1G03560	-	1:890155-892410	Col0Mocka_dir	Col0HrcCa_dir	OK	6.08525	7.55193	0.311528	0.808147	0.21195	0.580428	no	AT1G03560	Pentatricopeptide repeat (PPR-like) superfamily protein
AT1G03590	AT1G03590	-	1:894253-897518	Col0Mocka_dir	Col0HrcCa_dir	OK	8.73034	9.65201	0.144792	0.416289	0.50835	0.814394	no	AT1G03590	Protein phosphatase 2C family protein
AT1G03600	AT1G03600	-	1:898875-899655	Col0Mocka_dir	Col0HrcCa_dir	OK	1097.79	985.175	-0.156153	-0.485579	0.4569	0.78493	no	PSB27	photosystem II family protein
AT1G03610	AT1G03610	-	1:900886-903003	Col0Mocka_dir	Col0HrcCa_dir	OK	15.0104	25.3266	0.754689	2.25098	0.00065	0.0127081	yes	AT1G03610	plant/protein (DUF789)
AT1G03620	AT1G03620	-	1:904318-906186	Col0Mocka_dir	Col0HrcCa_dir	NOTEST	0.117711	0.348901	1.56757	0	1	1	no	AT1G03620	ELMO/CED-12 family protein
AT1G03630	AT1G03630	-	1:907641-909376	Col0Mocka_dir	Col0HrcCa_dir	OK	103.659	105.26	0.0221101	0.0693238	0.91615	0.980726	no	POR C	protochlorophyllide oxidoreductase C
AT1G03650	AT1G03650	-	1:910022-911193	Col0Mocka_dir	Col0HrcCa_dir	OK	3.63874	4.66435	0.358235	0.605604	0.3441	0.709475	no	AT1G03650	Acyl-CoA N-acyltransferases (NAT) superfamily protein
AT1G03660	AT1G03660	-	1:911435-911759	Col0Mocka_dir	Col0HrcCa_dir	OK	14.8708	4.96349	-1.58305	-1.38257	0.0493	0.280443	no	AT1G03660	Ankyrin-repeat containing protein
AT1G03670	AT1G03670	-	1:914221-916222	Col0Mocka_dir	Col0HrcCa_dir	NOTEST	0	0.0534155	inf	0	1	1	no	AT1G03670	ankyrin repeat family protein
AT1G03680	AT1G03680	-	1:916818-918064	Col0Mocka_dir	Col0HrcCa_dir	OK	456.28	359.816	-0.342662	-1.07085	0.1019	0.409439	no	THM1	thioredoxin M-type 1
AT1G03687	AT1G03687	-	1:918298-920507	Col0Mocka_dir	Col0HrcCa_dir	OK	7.78477	6.59292	-0.239737	-0.598304	0.34595	0.710608	no	AT1G03687	DTW domain-containing protein
AT1G03700	AT1G03700	-	1:920949-921901	Col0Mocka_dir	Col0HrcCa_dir	OK	3.40712	3.67751	0.110177	0.151712	0.81405	0.948534	no	AT1G03700	Uncharacterized protein family (UPF0497)
AT1G03710	AT1G03710	-	1:923425-924726	Col0Mocka_dir	Col0HrcCa_dir	NOTEST	0.0651737	0.181788	1.4799	0	1	1	no	AT1G03710	Cystatin/monellin superfamily protein
AT1G03720	AT1G03720	-	1:924995-926373	Col0Mocka_dir	Col0HrcCa_dir	NOTEST	0	0	0	0	1	1	no	AT1G03720	Cysteine proteinases superfamily protein
AT1G03730	AT1G03730	-	1:930827-931895	Col0Mocka_dir	Col0HrcCa_dir	OK	10.3022	15.4366	0.583406	1.34226	0.0369	0.235564	no	AT1G03730	pyrroline-5-carboxylate reductase
AT1G03740	AT1G03740	-	1:933511-937043	Col0Mocka_dir	Col0HrcCa_dir	OK	6.18714	10.2026	0.721596	2.06313	0.0019	0.0296875	yes	AT1G03740	Protein kinase superfamily protein
AT1G03750	AT1G03750	-	1:937919-943377	Col0Mocka_dir	Col0HrcCa_dir	OK	2.83144	2.02837	-0.481216	-0.929986	0.14915	0.492968	no	SWI2	switch 2
AT1G03760	AT1G03760	-	1:937919-943377	Col0Mocka_dir	Col0HrcCa_dir	OK	1.62121	1.81278	0.161128	0.213403	0.74165	0.919587	no	AT1G03760	Prefoldin chaperone subunit family protein
AT1G03770	AT1G03770	-	1:944571-947483	Col0Mocka_dir	Col0HrcCa_dir	OK	1.25651	1.19332	-0.0744402	-0.118242	0.8557	0.962955	no	RING1B	RING 1B
AT1G03780	AT1G03780	-	1:947519-951827	Col0Mocka_dir	Col0HrcCa_dir	OK	2.71351	2.72626	0.00676568	0.0162452	0.9794	0.995637	no	TPX2	targeting protein for XKLP2
AT1G03790	AT1G03790	-	1:954524-956097	Col0Mocka_dir	Col0HrcCa_dir	NOTEST	0	0.0290073	inf	0	1	1	no	SOM	Zinc finger C-x8-C-x5-C-x3-H type family protein
AT1G03800	AT1G03800	-	1:957260-957998	Col0Mocka_dir	Col0HrcCa_dir	OK	1.93421	1.62496	-0.251342	-0.280943	0.6846	0.898897	no	ERF10	ERF domain protein 10
AT1G03810	AT1G03810	-	1:958758-959609	Col0Mocka_dir	Col0HrcCa_dir	NOTEST	0	0	0	0	1	1	no	AT1G03810	Nucleic acid-binding, OB-fold-like protein
AT1G03820	AT1G03820	-	1:959868-960728	Col0Mocka_dir	Col0HrcCa_dir	OK	43.2024	43.7126	0.0169385	0.0515332	0.93945	0.986924	no	AT1G03820	E6-like protein
AT1G03830	AT1G03830	-	1:962015-966757	Col0Mocka_dir	Col0HrcCa_dir	OK	1.92452	2.30997	0.263372	0.606382	0.34585	0.710588	no	AT1G03830	guanylate-binding family protein
AT1G03840	AT1G03840	-	1:967502-970130	Col0Mocka_dir	Col0HrcCa_dir	OK	2.02306	2.59102	0.356975	0.668232	0.29695	0.670248	no	MGP	C2H2 and C2HC zinc fingers superfamily protein
AT1G03850	AT1G03850	-	1:976096-977761	Col0Mocka_dir	Col0HrcCa_dir	OK	7.98667	13.907	0.800143	1.99721	0.00245	0.0356908	yes	GRXS13	Glutaredoxin family protein
AT1G03860	AT1G03860	-	1:979307-981885	Col0Mocka_dir	Col0HrcCa_dir	OK	35.0814	33.8655	-0.0508922	-0.159612	0.80195	0.944087	no	PHB2	prohibitin 2
AT1G03870	AT1G03870	-	1:982505-983540	Col0Mocka_dir	Col0HrcCa_dir	OK	124.991	161.726	0.371723	1.17019	0.0725	0.345812	no	FLA9	FASCICLIN-like arabinoogalactan 9
AT1G03880	AT1G03880	-	1:985750-988146	Col0Mocka_dir	Col0HrcCa_dir	NOTEST	0	0	0	0	1	1	no	CRU2	cruciferin 2
AT1G03890	AT1G03890	-	1:989197-991020	Col0Mocka_dir	Col0HrcCa_dir	NOTEST	0	0	0	0	1	1	no	AT1G03890	RmlC-like cupins superfamily protein
AT1G03900	AT1G03900	-	1:991138-993118	Col0Mocka_dir	Col0HrcCa_dir	OK	34.4765	32.6359	-0.0791524	-0.247841	0.7044	0.905808	no	ABCI18	non-intrinsic ABC protein 4
AT1G03905	AT1G03905	-	1:993399-995784	Col0Mocka_dir	Col0HrcCa_dir	OK	4.48771	4.49484	0.0022903	0.00510209	0.99165	0.997973	no	ABCI19	P-loop containing nucleoside triphosphate hydrolases superfamily protein
AT1G03910	AT1G03910	-	1:996114-1000437	Col0Mocka_dir	Col0HrcCa_dir	OK	8.43527	8.43758	0.000395487	0.00118364	0.999	0.999205	no	AT1G03910	cactus-binding carboxy-terminal, cactin
AT1G03920	AT1G03920	-	1:1001320-1004383	Col0Mocka_dir	Col0HrcCa_dir	OK	0.410589	1.20089	1.54833	1.88901	0.00845	0.0912082	no	AT1G03920	Protein kinase family protein
AT1G03930	AT1G03930	-	1:1004768-1008370	Col0Mocka_dir	Col0HrcCa_dir	OK	11.4119	12.8617	0.172542	0.516987	0.41955	0.760197	no	ADK1	dual specificity kinase 1
AT1G03940	AT1G03940	-	1:1009541-1011056	Col0Mocka_dir	Col0HrcCa_dir	OK	12.7436	20.4711	0.683819	1.79999	0.00485	0.0604689	no	AT1G03940	HXXXD-type acyl-transferase family protein
AT1G03950	AT1G03950	-	1:1011171-1013365	Col0Mocka_dir	Col0HrcCa_dir	OK	1.82264	1.35613	-0.426538	-0.625349	0.3328	0.702091	no	VPS2.3	vacuolar protein sorting-associated protein 2.3
AT1G03960	AT1G03960	-	1:1013714-1017929	Col0Mocka_dir	Col0HrcCa_dir	OK	2.63005	2.91238	0.147106	0.337627	0.5967	0.857869	no	AT1G03960	Calcium-binding EF hand family protein
AT1G03970	AT1G03970	-	1:1018099-1022108	Col0Mocka_dir	Col0HrcCa_dir	OK	2.24002	3.9989	0.836092	0.90437	0.1844	0.545689	no	GBF4	G-box binding factor 4
AT1G03980	AT1G03980	-	1:1018099-1022108	Col0Mocka_dir	Col0HrcCa_dir	OK	5.68563	6.99328	0.298649	0.758572	0.2424	0.614967	no	PCS2	phytochelatin synthase 2
AT1G03982	AT1G03982	-	1:1022250-1023719	Col0Mocka_dir	Col0HrcCa_dir	NOTEST	0.113761	0.0552002	-1.04326	0	1	1	no	AT1G03982	PAK-box/P21-Rho-binding family protein
AT1G03990	AT1G03990	-	1:1024846-1027616	Col0Mocka_dir	Col0HrcCa_dir	OK	0.524995	1.67714	1.67563	2.35087	0.0012	0.0208147	yes	AT1G03990	Long-chain fatty alcohol dehydrogenase family protein
AT1G04000	AT1G04000	-	1:1028105-1029119	Col0Mocka_dir	Col0HrcCa_dir	OK	30.2482	24.0096	-0.33324	-0.940018	0.1464	0.488715	no	AT1G04000	hypothetical protein
AT1G04010	AT1G04010	-	1:1031199-1036237	Col0Mocka_dir	Col0HrcCa_dir	NOTEST	0.773551	0.725343	-0.0928337	0	1	1	no	PSAT1	phospholipid sterol acyl transferase 1
AT1G04020	AT1G04020	-	1:1036536-1040224	Col0Mocka_dir	Col0HrcCa_dir	OK	5.03017	4.40856	-0.190301	-0.489875	0.4458	0.777283	no	BARD1	breast cancer associated RING 1
AT1G04030	AT1G04030	-	1:1040382-1043864	Col0Mocka_dir	Col0HrcCa_dir	OK	2.10472	2.39144	0.184249	0.111499	0.8599	0.964266	no	AT1G04030	eisosome protein
AT1G04040	AT1G04040	-	1:1040382-1043864	Col0Mocka_dir	Col0HrcCa_dir	OK	71.7712	80.2382	0.160884	0.501053	0.44715	0.777835	no	AT1G04040	HAD superfamily, subfamily IIIB acid phosphatase
AT1G04050	AT1G04050	-	1:1045597-1049297	Col0Mocka_dir	Col0HrcCa_dir	OK	1.36852	1.44751	0.0809604	0.14862	0.8166	0.949108	no	SUVR1	histone-lysine N-methyltransferase SUVR2-like protein
AT1G04070	AT1G04070	-	1:1050552-1051186	Col0Mocka_dir	Col0HrcCa_dir	OK	19.3996	18.134	-0.0973335	-0.215479	0.734	0.918092	no	TOM22-I	translocase of outer membrane 22-I
AT1G04080	AT1G04080	-	1:1051311-1056827	Col0Mocka_dir	Col0HrcCa_dir	OK	14.6125	15.7846	0.111321	0.349812	0.58405	0.852139	no	PRP39	Tetratricopeptide repeat (TPR)-like superfamily protein
AT1G04090	AT1G04090	-	1:1057150-1059419	Col0Mocka_dir	Col0HrcCa_dir	OK	0.881965	0.667651	-0.401627	-0.462186	0.45435	0.783237	no	AT1G04090	vacuolar sorting-associated protein (DUF946)
AT1G04100	AT1G04100	-	1:1059505-1061191	Col0Mocka_dir	Col0HrcCa_dir	OK	0.978169	2.21207	1.17724	1.45027	0.0362	0.233015	no	IAA10	indoleacetic acid-induced protein 10
AT1G04110	AT1G04110	-	1:1061456-1063784	Col0Mocka_dir	Col0HrcCa_dir	OK	1.8277	2.06428	0.175607	0.307425	0.62625	0.870728	no	SDD1	Subtilase family protein
AT1G04120	AT1G04120	-	1:1064449-1071047	Col0Mocka_dir	Col0HrcCa_dir	OK	7.71959	8.34093	0.111683	0.344058	0.60335	0.860572	no	ABCC5	multidrug resistance-associated protein 5
AT1G04130	AT1G04130	-	1:1073426-1080630	Col0Mocka_dir	Col0HrcCa_dir	OK	1.59802	1.75492	0.135117	0.104451	0.86815	0.966912	no	TPR2	Tetratricopeptide repeat (TPR)-like superfamily protein
AT1G04140	AT1G04140	-	1:1073426-1080630	Col0Mocka_dir	Col0HrcCa_dir	OK	10.7538	10.9513	0.0262554	0.0784668	0.89865	0.976683	no	AT1G04140	Transducin family protein / WD-40 repeat family protein
AT1G04150	AT1G04150	-	1:1081207-1084246	Col0Mocka_dir	Col0HrcCa_dir	NOTEST	0.157096	0.0823053	-0.932589	0	1	1	no	AT1G04150	C2 calcium/lipid-binding plant phosphoribosyltransferase family protein
AT1G04160	AT1G04160	-	1:1086494-1096146	Col0Mocka_dir	Col0HrcCa_dir	NOTEST	0.193538	0.13766	-0.491504	0	1	1	no	XIB	myosin XI B
AT1G04170	AT1G04170	-	1:1096945-1099898	Col0Mocka_dir	Col0HrcCa_dir	OK	81.4416	54.9686	-0.567157	-1.7881	0.00655	0.0763116	no	EIF2 GAMMA	eukaryotic translation initiation factor 2 gamma subunit
AT1G04171	AT1G04171	-	1:1100443-1100608	Col0Mocka_dir	Col0HrcCa_dir	NOTEST	0	0	0	0	1	1	no
AT1G04180	AT1G04180	-	1:1104622-1105988	Col0Mocka_dir	Col0HrcCa_dir	OK	0.868986	1.17529	0.435614	0.473881	0.46245	0.787445	no	YUC9	YUCCA 9
AT1G04190	AT1G04190	-	1:1106427-1108715	Col0Mocka_dir	Col0HrcCa_dir	OK	6.751	5.43264	-0.313448	-0.758604	0.23915	0.611607	no	TPR3	Tetratricopeptide repeat (TPR)-like superfamily protein
AT1G04200	AT1G04200	-	1:1109481-1114107	Col0Mocka_dir	Col0HrcCa_dir	OK	3.34224	3.22562	-0.0512371	-0.125015	0.84425	0.958142	no	AT1G04200	dyggve-melchior-clausen syndrome protein
AT1G04210	AT1G04210	-	1:1114404-1122526	Col0Mocka_dir	Col0HrcCa_dir	OK	10.329	9.51673	-0.118166	-0.272829	0.67485	0.894623	no	AT1G04210	Leucine-rich repeat protein kinase family protein
AT1G04220	AT1G04220	-	1:1114404-1122526	Col0Mocka_dir	Col0HrcCa_dir	OK	18.5444	13.4754	-0.460652	-0.924575	0.15215	0.499053	no	KCS2	3-ketoacyl-CoA synthase 2
AT1G04230	AT1G04230	-	1:1125517-1128168	Col0Mocka_dir	Col0HrcCa_dir	OK	3.28791	2.5922	-0.342995	-0.712471	0.2698	0.641868	no	AT1G04230	rRNA-processing EFG1-like protein (DUF2361)
AT1G04240	AT1G04240	-	1:1128187-1129551	Col0Mocka_dir	Col0HrcCa_dir	OK	33.2601	49.1271	0.562729	1.71723	0.00815	0.0889613	no	SHY2	AUX/IAA transcriptional regulator family protein
AT1G04250	AT1G04250	-	1:1136257-1138613	Col0Mocka_dir	Col0HrcCa_dir	OK	14.5883	15.171	0.0565028	0.166968	0.8043	0.944804	no	AXR3	AUX/IAA transcriptional regulator family protein
AT1G04260	AT1G04260	-	1:1140527-1141365	Col0Mocka_dir	Col0HrcCa_dir	OK	37.9614	31.601	-0.264562	-0.728813	0.2595	0.632551	no	MPI7	CAMV movement protein interacting protein 7
AT1G04270	AT1G04270	-	1:1141603-1143053	Col0Mocka_dir	Col0HrcCa_dir	OK	603.053	488.465	-0.30403	-0.917858	0.1613	0.51255	no	RPS15	cytosolic ribosomal protein S15
AT1G04280	AT1G04280	-	1:1143435-1146654	Col0Mocka_dir	Col0HrcCa_dir	OK	11.4428	12.6525	0.144987	0.422698	0.5091	0.815258	no	AT1G04280	P-loop containing nucleoside triphosphate hydrolases superfamily protein
AT1G04290	AT1G04290	-	1:1147522-1148533	Col0Mocka_dir	Col0HrcCa_dir	OK	35.42	32.5464	-0.122069	-0.357838	0.5808	0.851144	no	AT1G04290	Thioesterase superfamily protein
AT1G04300	AT1G04300	-	1:1148596-1154652	Col0Mocka_dir	Col0HrcCa_dir	OK	15.3967	15.9351	0.0495896	0.156825	0.804	0.944804	no	AT1G04300	TRAF-like superfamily protein
AT1G04310	AT1G04310	-	1:1154763-1157711	Col0Mocka_dir	Col0HrcCa_dir	OK	2.07619	1.83149	-0.180917	-0.344691	0.59255	0.856079	no	ERS2	ethylene response sensor 2
AT1G04330	AT1G04330	-	1:1161310-1161982	Col0Mocka_dir	Col0HrcCa_dir	OK	2.75421	3.16489	0.200518	0.22146	0.7201	0.913204	no	AT1G04330	hypothetical protein
AT1G04340	AT1G04340	-	1:1163096-1164851	Col0Mocka_dir	Col0HrcCa_dir	OK	13.1362	10.8514	-0.275662	-0.713793	0.2638	0.637062	no	AT1G04340	HR-like lesion-inducing protein-like protein
AT1G04350	AT1G04350	-	1:1165164-1166768	Col0Mocka_dir	Col0HrcCa_dir	OK	56.6167	42.1423	-0.425957	-1.31881	0.03925	0.244602	no	AT1G04350	2-oxoglutarate (2OG) and Fe(II)-dependent oxygenase superfamily protein
AT1G04360	AT1G04360	-	1:1167456-1168878	Col0Mocka_dir	Col0HrcCa_dir	OK	6.38206	7.15848	0.16563	0.371096	0.56455	0.845429	no	AT1G04360	RING/U-box superfamily protein
AT1G04370	AT1G04370	-	1:1175176-1175578	Col0Mocka_dir	Col0HrcCa_dir	NOTEST	0.0872358	0.486083	2.47821	0	1	1	no	ERF14	Ethylene-responsive element binding factor 14
AT1G04380	AT1G04380	-	1:1176920-1178407	Col0Mocka_dir	Col0HrcCa_dir	NOTEST	0.276574	0.216218	-0.355176	0	1	1	no	AT1G04380	2-oxoglutarate (2OG) and Fe(II)-dependent oxygenase superfamily protein
AT1G04390	AT1G04390	-	1:1179362-1183704	Col0Mocka_dir	Col0HrcCa_dir	OK	4.05466	3.30908	-0.29315	-0.742508	0.2476	0.621808	no	AT1G04390	BTB/POZ domain-containing protein
AT1G04400	AT1G04400	-	1:1185549-1188517	Col0Mocka_dir	Col0HrcCa_dir	OK	28.3816	41.4061	0.544887	1.70553	0.00955	0.0987887	no	CRY2	cryptochrome 2
AT1G04410	AT1G04410	-	1:1189077-1191412	Col0Mocka_dir	Col0HrcCa_dir	OK	319.671	263.815	-0.277062	-0.829032	0.2008	0.566939	no	c-NAD-MDH1	Lactate/malate dehydrogenase family protein
AT1G04420	AT1G04420	-	1:1191607-1193884	Col0Mocka_dir	Col0HrcCa_dir	OK	57.9943	46.5391	-0.317469	-1.0023	0.12225	0.448173	no	AT1G04420	NAD(P)-linked oxidoreductase superfamily protein
AT1G04430	AT1G04430	-	1:1198117-1201527	Col0Mocka_dir	Col0HrcCa_dir	OK	28.3237	36.6282	0.370945	1.16565	0.0707	0.341514	no	AT1G04430	S-adenosyl-L-methionine-dependent methyltransferases superfamily protein
AT1G04440	AT1G04440	-	1:1202254-1205803	Col0Mocka_dir	Col0HrcCa_dir	OK	21.4673	21.4433	-0.00161029	-0.00499801	0.9929	0.998146	no	CKL13	casein kinase like 13
AT1G04445	AT1G04445	-	1:1207343-1207862	Col0Mocka_dir	Col0HrcCa_dir	OK	0.0746615	1.17232	3.97286	1.13502	0.2049	0.570721	no	AT1G04445	C2H2-like zinc finger protein
AT1G04450	AT1G04450	-	1:1208520-1209874	Col0Mocka_dir	Col0HrcCa_dir	NOTEST	0	0	0	0	1	1	no	RIC3	ROP-interactive CRIB motif-containing protein 3
[truncated: 16,023 more rows]

## Sheet: dek2_M_vs_dek2_T
test_id	gene_id	gene	locus	sample_1	sample_2	status	value_1	value_2	log2(fold_change)	test_stat	p_value	q_value	significant	gene_name	gene_description
[truncated: 16,383 more rows]

[truncated: 1 more sheets: WT_T_vs_dek2_T]
